# Supplementary material for: Mechanism and origins of regioselectivity of selenium-catalyzed allylic amination reactions
Source: Royal Society of Chemistry journal article supplement (doi:10.1039/d4qo01794c), 2024-11-05
Supplement: d4qo01794c1.pdf [file d4qo01794c1.pdf]

## Supplementary Information

# Mechanism and Origins of Regioselectivity of Selenium-Catalyzed Allylic Amination Reactions

Xiaoxiao Hu<sup>a,b</sup>, Dengmengfei Xiao<sup>b,c</sup>, Yu Chen<sup>b</sup>, Yi Lu<sup>b</sup>, Zhihan Zhang<sup>b</sup>, and Peiyuan Yu<sup>\*b</sup>

<sup>a</sup>*School of Chemistry and Chemical Engineering, Harbin Institute of Technology, Harbin 150001, China;*

<sup>b</sup>*Department of Chemistry and Shenzhen Grubbs Institute, Southern University of Science and Technology, Shenzhen, Guangdong 518055, China;*

<sup>c</sup>*Faculty of Chemistry and Food Chemistry, Technische Universität Dresden, 01062 Dresden, Germany.*

## Contents

|                                                                                                                   |   |
|-------------------------------------------------------------------------------------------------------------------|---|
| <b>I. Free energy profiles for the direct ene reaction of intermediate 9 with the substrate 11</b> .....          | 3 |
| <b>II. Free energy profiles for the generation of the active catalyst with the SePCy<sub>3</sub> ligand</b> ..... | 4 |
| <b>III. Free energy profiles for the formation of the product with the SePCy<sub>3</sub> ligand</b> .....         | 4 |
| <b>IV. Free energy profiles for the generation of the active catalyst with the OPCy<sub>3</sub> ligand</b> .....  | 5 |
| <b>V. Free energy profiles for the formation of the product with the OPCy<sub>3</sub> ligand</b> .....            | 5 |
| <b>VI. Free energy profiles for the generation of the active catalyst with the IMe ligand</b> .....               | 6 |
| <b>VII. Free energy profiles for the formation of the product with the IMe ligand</b> .....                       | 6 |
| <b>VIII. Free energy profiles for the generation of the active catalyst with the SeIMe ligand</b> .....           | 7 |
| <b>IX. Free energy profiles for the formation of the product with the SeIMe ligand</b> .....                      | 7 |

|                                                                                                                              |           |
|------------------------------------------------------------------------------------------------------------------------------|-----------|
| <b>X. Free energy profiles for the generation of the active catalyst with the OIMe ligand.....</b>                           | <b>8</b>  |
| <b>XI. Free energy profiles for the formation of the product with the OIMe ligand .....</b>                                  | <b>8</b>  |
| <b>XII. Calculated Gibbs free energy profiles of ene reaction with the substrate 42b and 44a .....</b>                       | <b>9</b>  |
| <b>XIII. The dihedral angle of the six-membered ring in the reactant component for structures of 38, TS19 and TS20 .....</b> | <b>10</b> |
| <b>XV. Energies and Cartesian coordinates of all the structures .....</b>                                                    | <b>11</b> |

# I. Free energy profiles for the direct ene reaction of intermediate **9** with the substrate **11**

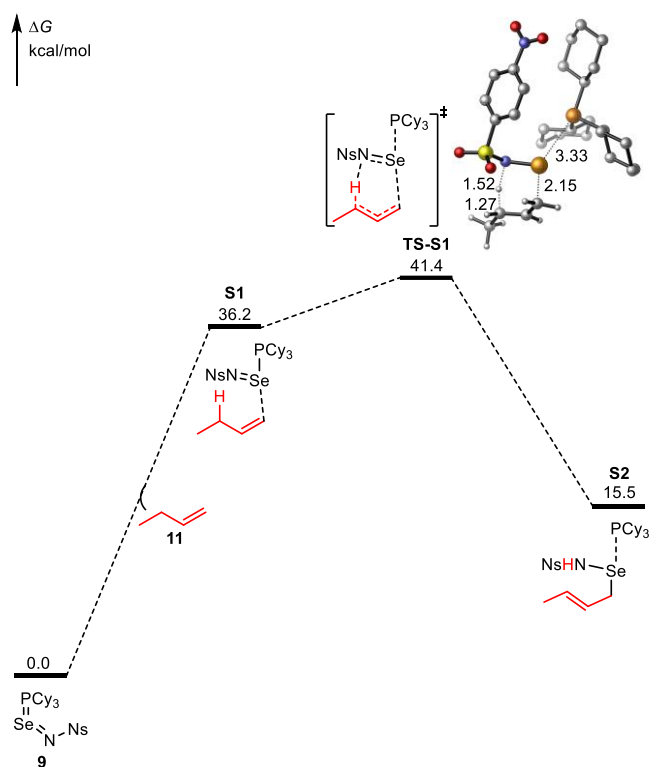

**Fig. S1.** Free energy profiles for the the direct ene reaction of intermediate **9** with the substrate **11**.

## II. Free energy profiles for the generation of the active catalyst with the SePCy<sub>3</sub> ligand

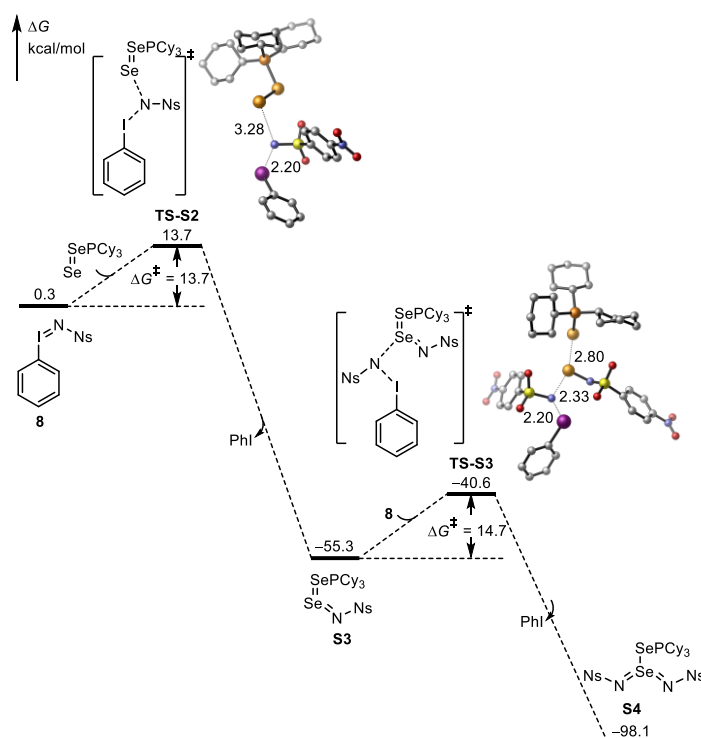

**Fig. S2.** Free energy profiles for the generation of the active catalyst with the SePCy<sub>3</sub> ligand, with selected bond lengths in Å.

## III. Free energy profiles for the formation of the product with the SePCy<sub>3</sub> ligand

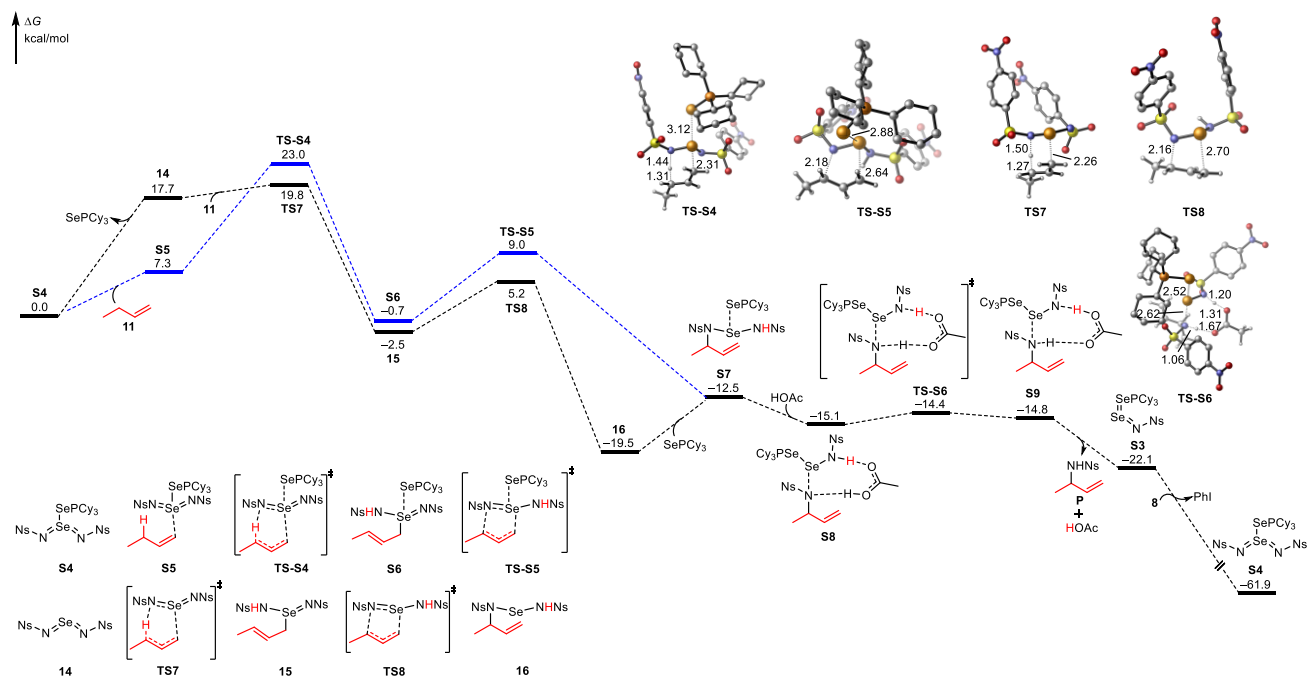

**Fig. S3.** Free energy profiles for ene reaction, sigmatropic shift and hydrogen transfer with the SePCy<sub>3</sub> ligand, leading to the formation of the final product, and selected bond lengths are given in Å.

#### IV. Free energy profiles for the generation of the active catalyst with the OPCy<sub>3</sub> ligand

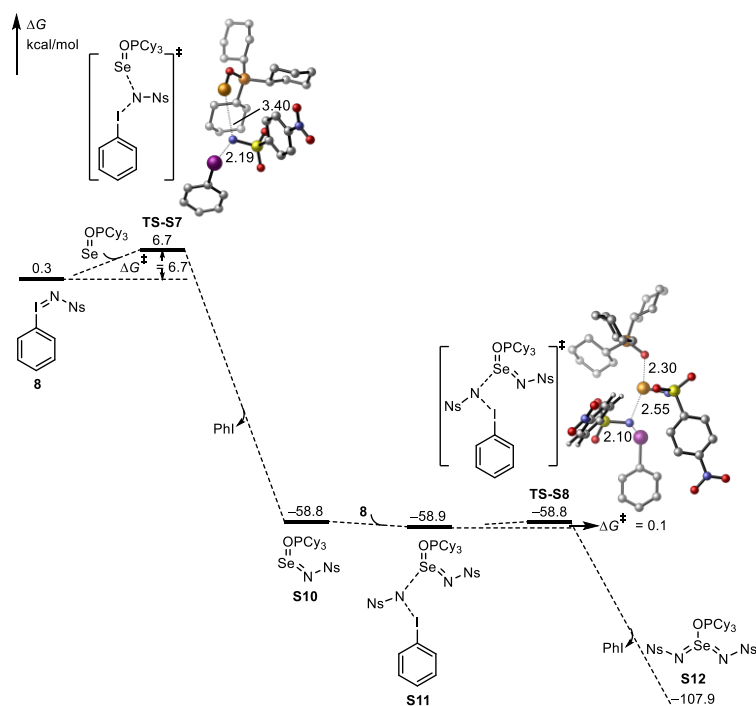

**Fig. S4.** Free energy profiles for the generation of the active catalyst with the OPCy<sub>3</sub> ligand, with selected bond lengths in Å.

#### V. Free energy profiles for the formation of the product with the OPCy<sub>3</sub> ligand

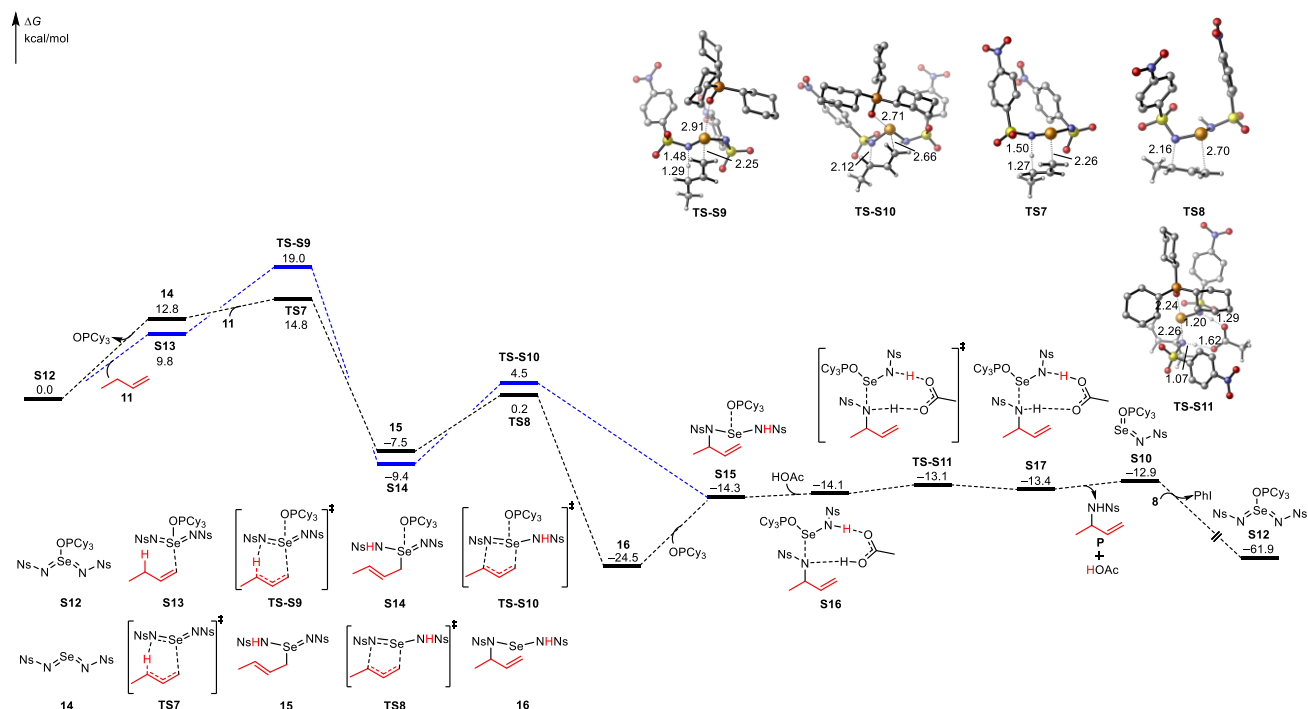

**Fig. S5.** Free energy profiles for ene reaction, sigmatropic shift and hydrogen transfer with the OPCy<sub>3</sub> ligand, leading to the formation of the final product, and selected bond lengths are given in Å.

## VI. Free energy profiles for the generation of the active catalyst with the IMe ligand

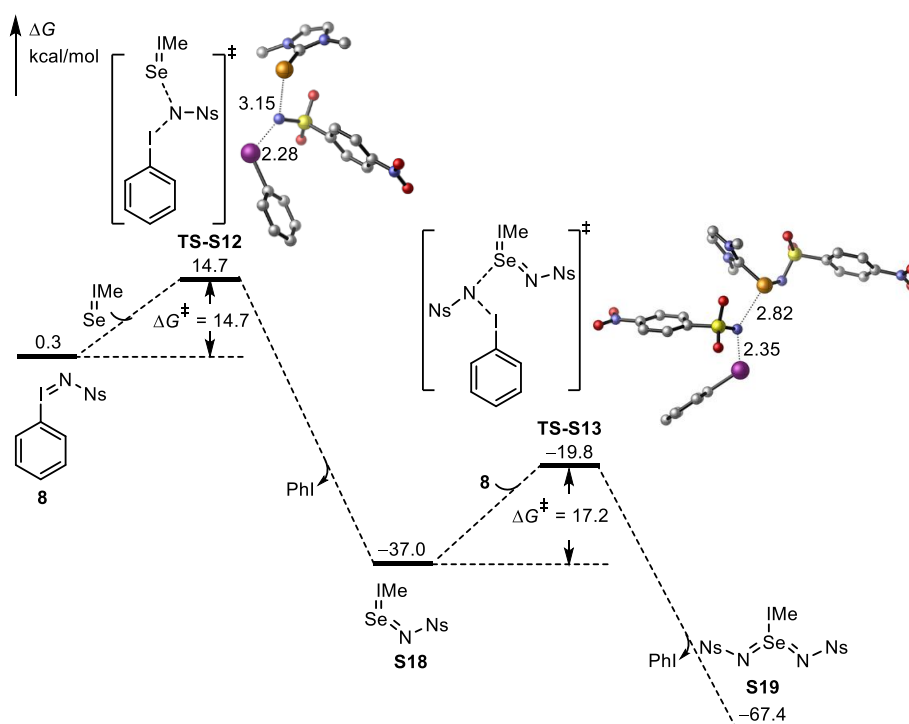

**Fig. S6.** Free energy profiles for the generation of the active catalyst with the IMe ligand, with selected bond lengths in Å.

## VII. Free energy profiles for the formation of the product with the IMe ligand

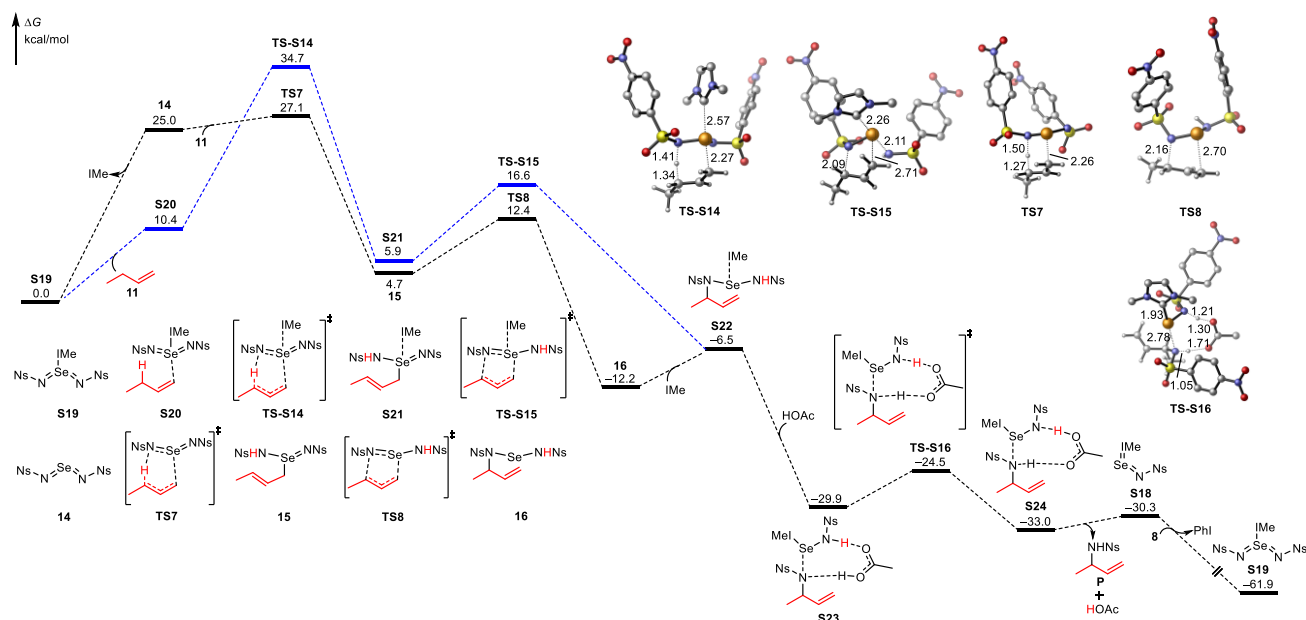

**Fig. S7.** Free energy profiles for ene reaction, sigmatropic shift and hydrogen transfer with the IMe ligand, leading to the formation of the final product, and selected bond lengths are given in Å.

## VIII. Free energy profiles for the generation of the active catalyst with the SeIme ligand

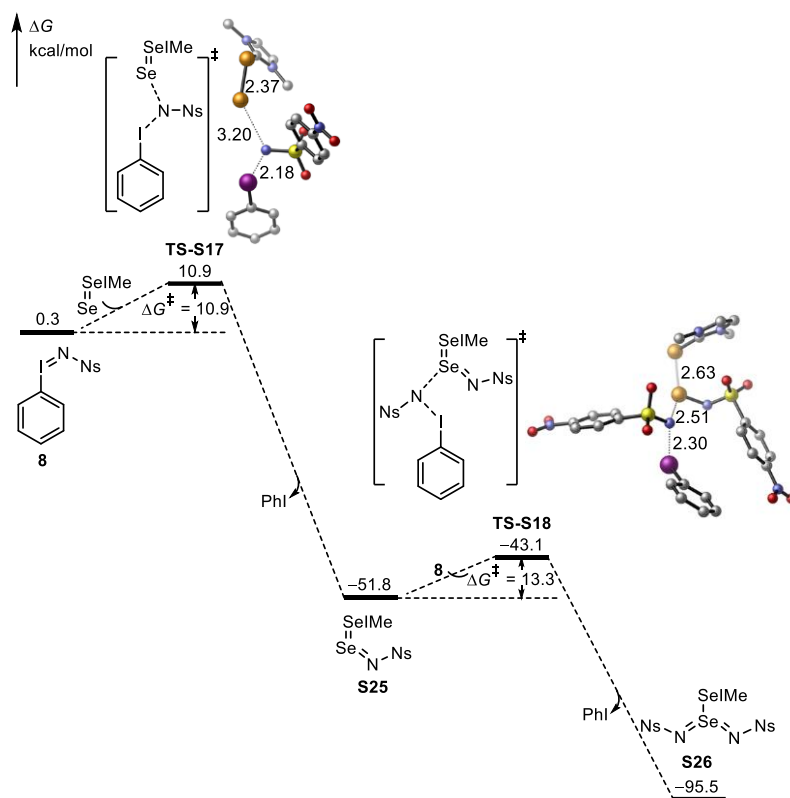

**Fig. S8.** Free energy profiles for the generation of the active catalyst with the SeIme ligand, with selected bond lengths in Å.

## IX. Free energy profiles for the formation of the product with the SeIme ligand

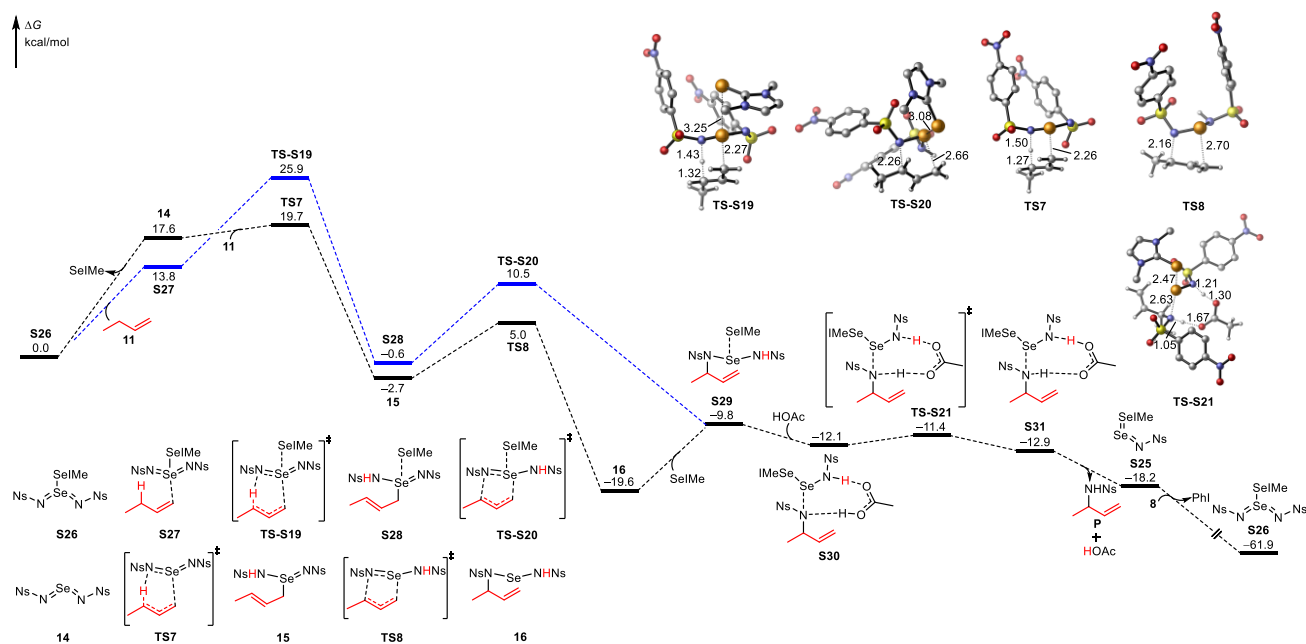

**Fig. S9.** Free energy profiles for ene reaction, sigmatropic shift and hydrogen transfer with the SeIme ligand, leading to the formation of the final product, and selected bond lengths are given in Å.

## X. Free energy profiles for the generation of the active catalyst with the OIme ligand

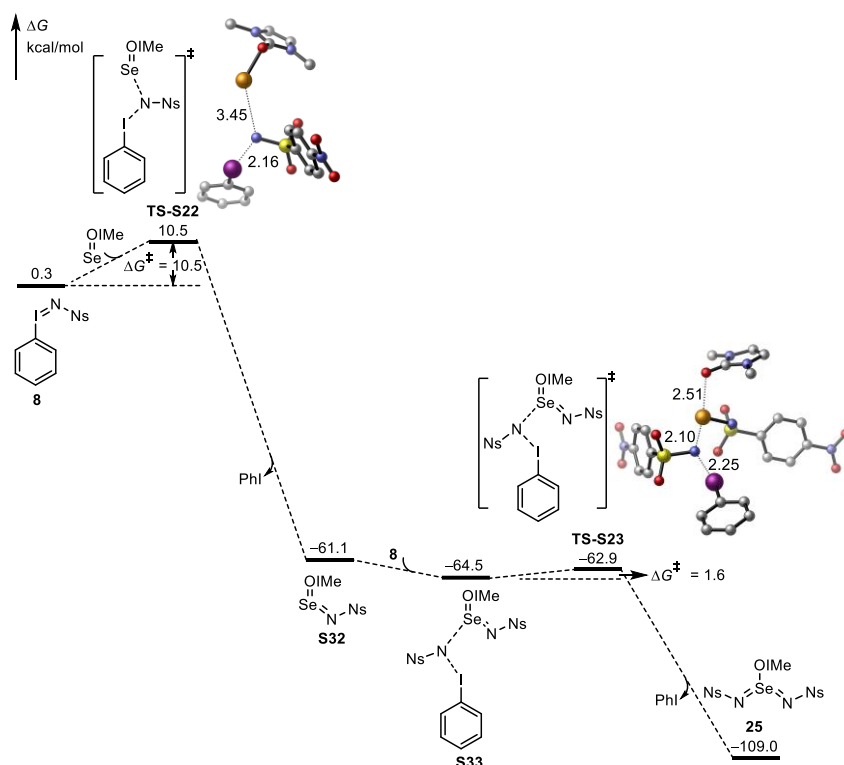

**Fig. S10.** Free energy profiles for the generation of the active catalyst with the OIme ligand, with selected bond lengths in Å.

## XI. Free energy profiles for the formation of the product with the OIme ligand

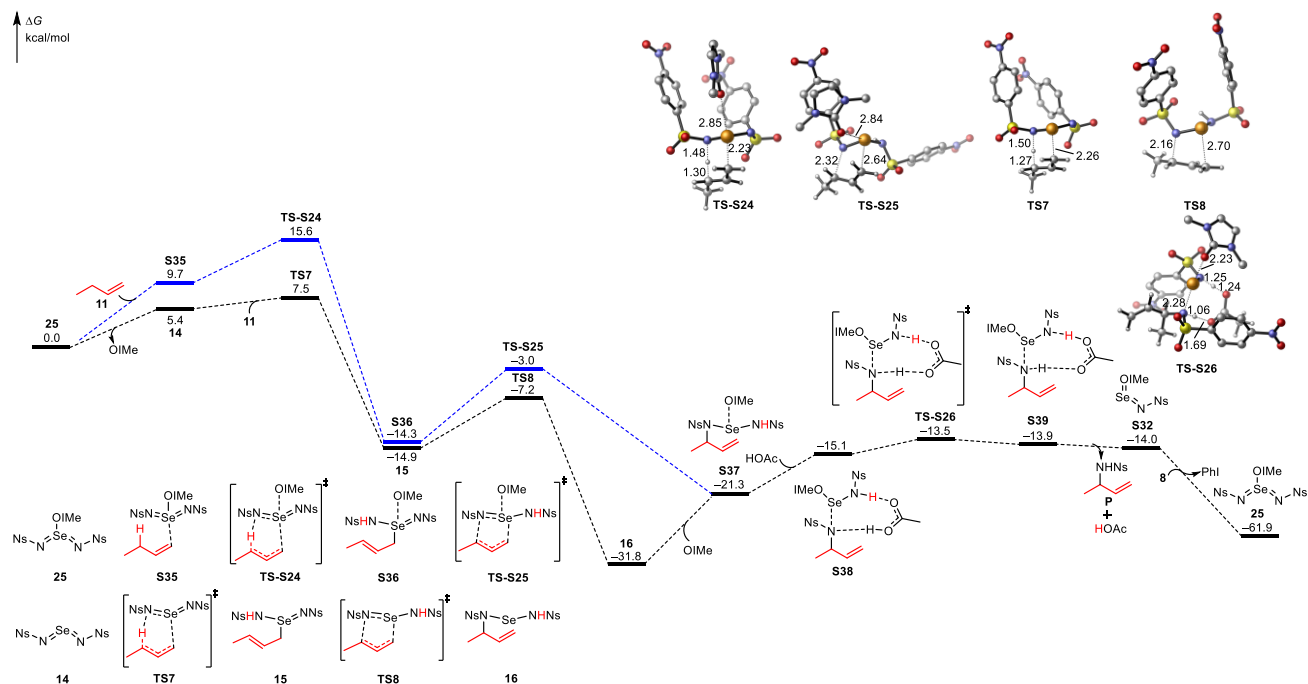

**Fig. S11.** Free energy profiles for ene reaction, sigmatropic shift and hydrogen transfer with the OIme ligand, leading to the formation of the final product, and selected bond lengths are given in Å.



## XII. Calculated Gibbs free energy profiles of ene reaction with the substrate 42b and 44a

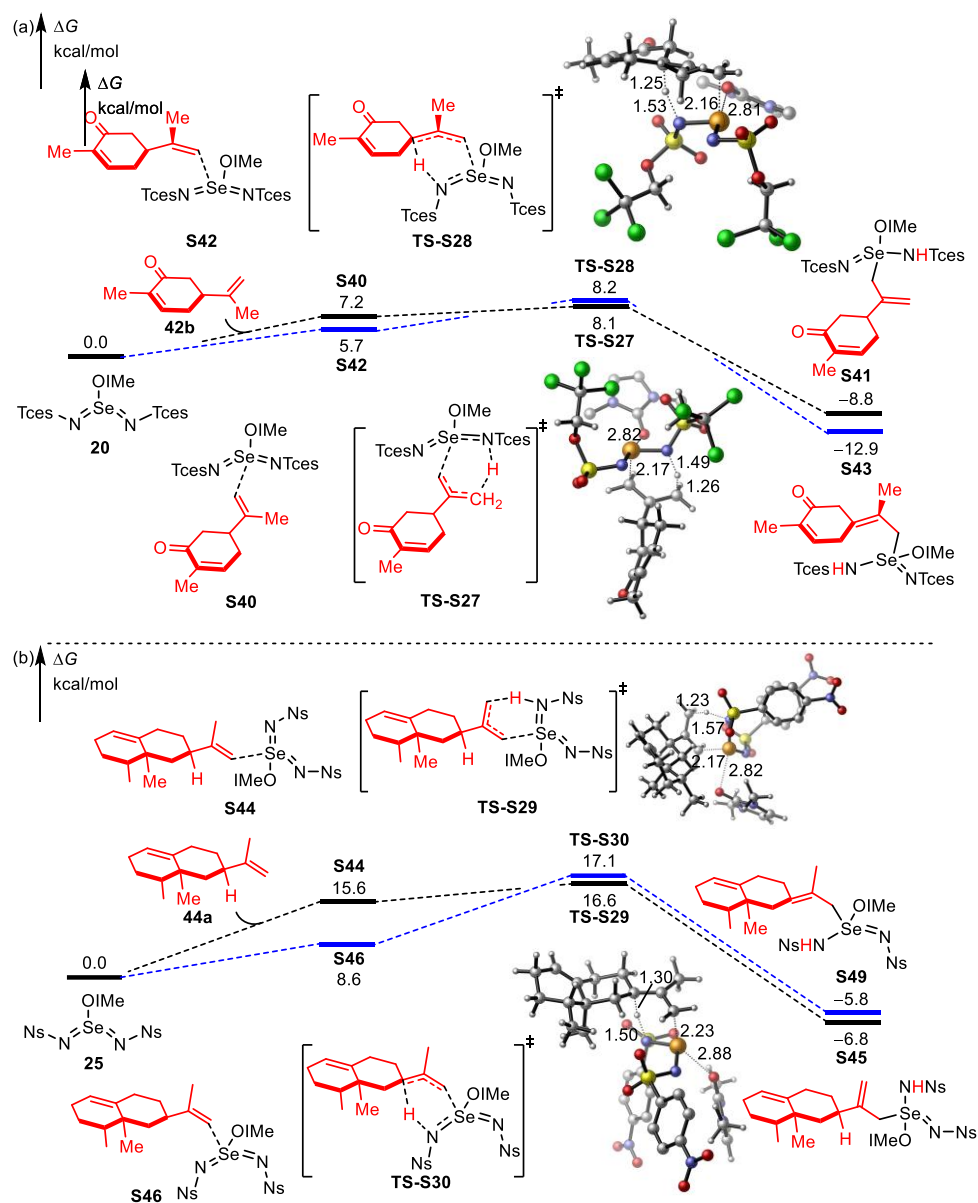

**Fig. S12.** Free energy profiles for ene reaction with the substrate **42b** and **44a**, with selected bond lengths in Å.

**XIII. The dihedral angle of the six-membered ring in the reactant component for structures of 38, TS19 and TS20**

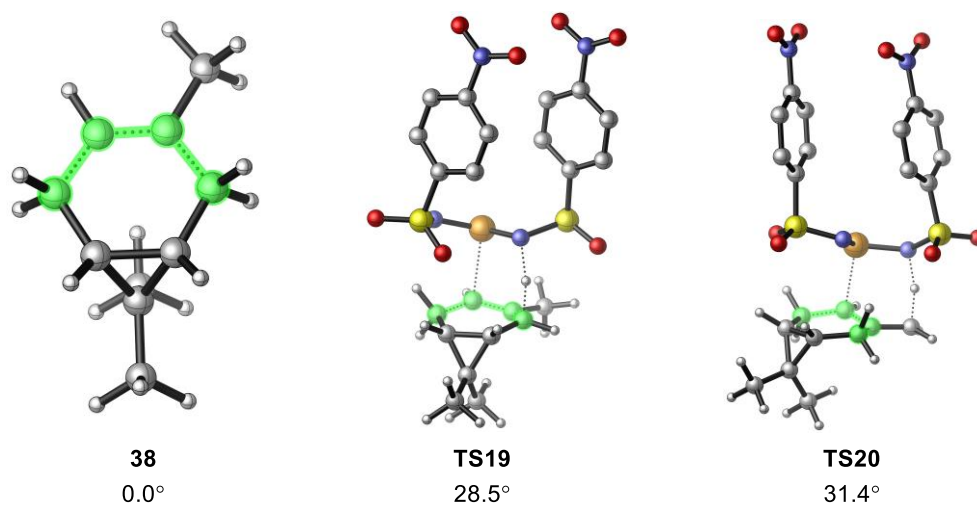

**Fig. S13.** The dihedral angle of the six-membered ring in the reactant component for structures of **38**, **TS19** and **TS20**.

#### XIV. Energies and Cartesian coordinates of all the structures

**Tables S1.** Energies and Cartesian coordinates of all the structures reported in the text of this manuscript.

1

0 imaginary frequency

H = -699.977998

G = -700.040213

Esol = -700.189259

|   |             |             |             |
|---|-------------|-------------|-------------|
| C | 2.46714800  | -1.76700300 | 0.17843800  |
| O | 1.61121000  | -1.48246100 | -0.79441400 |
| O | 2.31340200  | -1.49241900 | 1.36004400  |
| C | 3.69943000  | -2.48371300 | -0.35369500 |
| H | 4.18774200  | -1.86964700 | -1.11714600 |
| H | 4.39192100  | -2.68194500 | 0.46600600  |
| H | 3.40570500  | -3.42412100 | -0.83099100 |
| I | -0.35787000 | -0.71832300 | -0.20929200 |
| O | -2.19937900 | 0.40655100  | 0.22274700  |
| C | -3.20491900 | -0.44620800 | 0.24818300  |
| O | -3.07036500 | -1.65148400 | 0.05706700  |
| C | -4.54126200 | 0.20995300  | 0.54404800  |
| H | -4.51553900 | 0.66634200  | 1.53901400  |
| H | -4.73667400 | 1.00891200  | -0.17799100 |
| H | -5.33479100 | -0.53748800 | 0.50028600  |
| C | 0.47785000  | 1.25861600  | -0.07775900 |
| C | -0.01101900 | 2.23526800  | -0.94006100 |
| C | 1.46750300  | 1.50658400  | 0.86680000  |
| C | 0.52673100  | 3.52092400  | -0.85007900 |
| H | -0.79816400 | 2.01378900  | -1.65108500 |
| C | 1.99487600  | 2.80013900  | 0.93417700  |
| H | 1.82755000  | 0.71501900  | 1.51409500  |

|   |            |            |             |
|---|------------|------------|-------------|
| C | 1.52809800 | 3.80179700 | 0.08206500  |
| H | 0.16031200 | 4.29905000 | -1.51358400 |
| H | 2.77035600 | 3.01782100 | 1.66304900  |
| H | 1.94315100 | 4.80374900 | 0.14454400  |

10

0 imaginary frequency

H = -5527.769347

G = -5527.884893

Esol = -5528.520508

|    |             |             |             |
|----|-------------|-------------|-------------|
| Se | -0.50278400 | -0.31202800 | -1.27995600 |
| N  | -1.07808200 | -1.93803800 | -1.67534100 |
| S  | -1.14730700 | -3.13425700 | -0.53323900 |
| O  | -1.86664000 | -4.24668400 | -1.16365900 |
| O  | -1.64927600 | -2.62318800 | 0.76626100  |
| C  | 0.54879300  | -3.66469700 | -0.25698600 |
| C  | 0.98456900  | -3.88041600 | 1.05021500  |
| C  | 1.37442000  | -3.91829800 | -1.35548400 |
| C  | 2.27467000  | -4.35441600 | 1.26873400  |
| H  | 0.32106300  | -3.66629500 | 1.87968700  |
| C  | 2.66537300  | -4.38858200 | -1.14165800 |
| H  | 1.01818500  | -3.73204900 | -2.36254000 |
| C  | 3.09077600  | -4.60030900 | 0.16824000  |
| H  | 2.65528900  | -4.52863400 | 2.26711800  |
| H  | 3.34154200  | -4.58471200 | -1.96389500 |
| N  | 4.45771700  | -5.09821900 | 0.39858800  |
| O  | 5.15917300  | -5.32043600 | -0.58728700 |
| O  | 4.81515000  | -5.26912900 | 1.56390100  |
| N  | 0.74094000  | -0.17994300 | 0.04104000  |

|   |             |             |             |
|---|-------------|-------------|-------------|
| S | 2.24686200  | -0.24517900 | -0.63082800 |
| O | 3.10163700  | -1.14099600 | 0.15604000  |
| O | 2.13665700  | -0.43081700 | -2.10095200 |
| C | 2.93661100  | 1.40867400  | -0.37979200 |
| C | 3.10859700  | 2.25388000  | -1.47798100 |
| C | 3.30930500  | 1.80760700  | 0.90830900  |
| C | 3.64295300  | 3.52734200  | -1.28735700 |
| H | 2.84280500  | 1.90124500  | -2.46854800 |
| C | 3.83442100  | 3.08045100  | 1.10684300  |
| H | 3.20317800  | 1.11937100  | 1.74000100  |
| C | 3.98776900  | 3.92180100  | 0.00391600  |
| H | 3.80092500  | 4.20805400  | -2.11487200 |
| H | 4.13449100  | 3.42586400  | 2.08842900  |
| N | 4.53606000  | 5.27313200  | 0.21159900  |
| O | 4.82476000  | 5.60100200  | 1.36190700  |
| O | 4.66487100  | 5.99504400  | -0.77652300 |
| P | -2.19484700 | 0.68547900  | 0.10227800  |
| C | -6.54373600 | -0.14255800 | -1.71101000 |
| C | -5.54963700 | -1.29866400 | -1.54189000 |
| C | -4.44172600 | -0.95404300 | -0.53330800 |
| C | -3.70824200 | 0.33991300  | -0.95931200 |
| C | -4.70491800 | 1.51387000  | -1.09378600 |
| C | -5.82255200 | 1.15721900  | -2.09178100 |
| H | -7.09109400 | 0.00859000  | -0.76885800 |
| H | -7.29399300 | -0.39172400 | -2.47093400 |
| H | -5.09007600 | -1.54073000 | -2.51013200 |
| H | -4.89395800 | -0.80564400 | 0.45670800  |
| H | -3.26936900 | 0.14953100  | -1.95009200 |
| H | -5.15066800 | 1.73755200  | -0.11504100 |
| H | -4.20244500 | 2.42655800  | -1.43087300 |

|   |             |             |             |
|---|-------------|-------------|-------------|
| H | -5.38199800 | 1.05046900  | -3.09345400 |
| H | -6.53261800 | 1.99125600  | -2.14998700 |
| H | -6.06670300 | -2.20596600 | -1.20887100 |
| H | -3.74412100 | -1.78900400 | -0.44414400 |
| C | -0.17222300 | 4.95539800  | -0.47944300 |
| C | -0.60692000 | 4.54118500  | 0.93238300  |
| C | -0.80877100 | 3.02004800  | 1.06063100  |
| C | -1.81051400 | 2.51488300  | -0.00132200 |
| C | -1.33161700 | 2.90656300  | -1.42151500 |
| C | -1.14999800 | 4.42799200  | -1.53743700 |
| H | 0.82972200  | 4.55450700  | -0.68452500 |
| H | -0.09350900 | 6.04690700  | -0.54598700 |
| H | -1.54733000 | 5.05128200  | 1.18872100  |
| H | 0.14684200  | 2.49775200  | 0.93644300  |
| H | -2.77861600 | 3.00133400  | 0.18639400  |
| H | -0.37374000 | 2.41075300  | -1.61938600 |
| H | -2.03102200 | 2.55155700  | -2.18808600 |
| H | -2.12682100 | 4.91926200  | -1.41867400 |
| H | -0.79664800 | 4.67432600  | -2.54574900 |
| H | 0.13469000  | 4.86723000  | 1.67123000  |
| H | -1.16889300 | 2.79101600  | 2.06730000  |
| C | -2.66270700 | 0.08364700  | 4.79344800  |
| C | -1.59312200 | -0.72737300 | 4.04803400  |
| C | -1.21109500 | -0.07891500 | 2.70675600  |
| C | -2.48177900 | 0.09283000  | 1.84391100  |
| C | -3.55625300 | 0.94245100  | 2.56525100  |
| C | -3.90731100 | 0.30012900  | 3.92149000  |
| H | -2.24584600 | 1.06076000  | 5.07951500  |
| H | -2.94420900 | -0.42006800 | 5.72609900  |
| H | -1.96280300 | -1.74485400 | 3.85979000  |

|   |             |             |            |
|---|-------------|-------------|------------|
| H | -0.74090200 | 0.89229900  | 2.89716000 |
| H | -2.87543500 | -0.91382900 | 1.66848100 |
| H | -3.18114200 | 1.96078100  | 2.73313700 |
| H | -4.46549200 | 1.03374400  | 1.95965500 |
| H | -4.39876900 | -0.66599800 | 3.73999000 |
| H | -4.63853800 | 0.93252500  | 4.44016500 |
| H | -0.69362700 | -0.82997000 | 4.66703300 |
| H | -0.48177100 | -0.68989800 | 2.17372200 |

11

0 imaginary frequency

H = -157.172322

G = -157.206004

Esol = -157.287531

|   |             |             |             |
|---|-------------|-------------|-------------|
| C | -1.86275900 | 0.01834500  | -0.27808000 |
| C | -0.72308400 | -0.29748000 | 0.33795700  |
| C | 0.53982800  | 0.52037200  | 0.30779800  |
| H | -0.67029300 | -1.22705200 | 0.90880000  |
| H | 0.36612200  | 1.44439000  | -0.25814900 |
| H | 0.79892400  | 0.82534400  | 1.33292500  |
| H | -2.74137200 | -0.61913500 | -0.22334600 |
| H | -1.96231000 | 0.93231000  | -0.86093600 |
| C | 1.73031300  | -0.24566900 | -0.29394200 |
| H | 2.64114400  | 0.36338500  | -0.27308300 |
| H | 1.93170700  | -1.16723300 | 0.26555200  |
| H | 1.53029500  | -0.52541600 | -1.33416600 |

12

0 imaginary frequency

H = -5684.931935

G = -5685.062360

Esol = -5685.800271

|    |             |             |             |
|----|-------------|-------------|-------------|
| Se | -0.25828600 | -0.00666400 | -1.28803000 |
| N  | -1.78376000 | -0.56162400 | -0.65458600 |
| N  | 0.97216900  | -1.16381700 | -0.76531500 |
| S  | -1.89326700 | -1.51142900 | 0.70819000  |
| O  | -1.46751800 | -0.76560900 | 1.90975600  |
| O  | -1.37984300 | -2.87358400 | 0.51126600  |
| S  | 2.36356300  | -1.09681900 | -1.65111400 |
| O  | 2.79057700  | 0.30592100  | -1.88755600 |
| O  | 2.33635100  | -1.98011100 | -2.82937600 |
| C  | -0.56360800 | -0.89398100 | -4.44294000 |
| C  | -1.38119100 | -1.77774800 | -3.85602300 |
| C  | -0.96019200 | -3.08905200 | -3.25347600 |
| H  | -2.44854900 | -1.55109500 | -3.80213500 |
| H  | 0.12401100  | -3.20445800 | -3.35047300 |
| H  | -1.17338000 | -3.07400200 | -2.17545300 |
| H  | -0.94074700 | 0.03117200  | -4.87372900 |
| H  | 0.50533400  | -1.07746700 | -4.52166600 |
| C  | -1.68415300 | -4.28589900 | -3.89262000 |
| H  | -1.44922900 | -4.36614100 | -4.95998600 |
| H  | -1.38712600 | -5.22248000 | -3.40809100 |
| H  | -2.77407800 | -4.19337400 | -3.79982100 |
| C  | 3.49756700  | -1.83690800 | -0.46328500 |
| C  | 4.82657300  | -1.40756700 | -0.48207900 |
| C  | 3.06648800  | -2.85742100 | 0.39014700  |
| C  | 5.74895600  | -2.00601400 | 0.37228400  |
| H  | 5.12700600  | -0.60712500 | -1.14959600 |



|   |             |             |             |
|---|-------------|-------------|-------------|
| C | 3.98670700  | -3.45476600 | 1.24768700  |
| H | 2.02393500  | -3.15656900 | 0.39742000  |
| C | 5.31116200  | -3.01965400 | 1.22235300  |
| H | 6.78808100  | -1.70200100 | 0.39130600  |
| H | 3.69412300  | -4.24307400 | 1.93004200  |
| N | 6.28414400  | -3.64814600 | 2.13452100  |
| O | 5.87720000  | -4.54215500 | 2.87436400  |
| O | 7.44380700  | -3.23799100 | 2.10094400  |
| C | -3.69399700 | -1.62370700 | 0.75643900  |
| C | -4.39769400 | -0.90264700 | 1.72088300  |
| C | -4.34541000 | -2.47539000 | -0.13922500 |
| C | -5.78558100 | -1.01236000 | 1.77848900  |
| H | -3.85773000 | -0.27430700 | 2.41999900  |
| C | -5.73159100 | -2.58569900 | -0.09010100 |
| H | -3.77177100 | -3.04637300 | -0.86087300 |
| C | -6.42707500 | -1.84793100 | 0.86738700  |
| H | -6.37013000 | -0.47110200 | 2.51194800  |
| H | -6.27582200 | -3.23038800 | -0.76886500 |
| N | -7.89662900 | -1.96052800 | 0.92128500  |
| O | -8.44079100 | -2.70842300 | 0.11082400  |
| O | -8.48794400 | -1.29718700 | 1.77198100  |
| P | 0.41536400  | 2.21187300  | 0.12944700  |
| C | 2.92778500  | 0.74533300  | 3.89107800  |
| C | 1.53832000  | 1.35390300  | 4.12284500  |
| C | 0.69711300  | 1.35173600  | 2.83511300  |
| C | 1.43331300  | 2.09670800  | 1.70128800  |
| C | 2.81819100  | 1.46070000  | 1.45166600  |
| C | 3.65595900  | 1.45537300  | 2.74197400  |
| H | 2.81862400  | -0.32059800 | 3.64592600  |
| H | 3.52582800  | 0.79751600  | 4.80916000  |

|   |             |            |             |
|---|-------------|------------|-------------|
| H | 1.64814800  | 2.38577000 | 4.48987100  |
| H | 0.49347800  | 0.32271500 | 2.52494300  |
| H | 1.58466900  | 3.14236300 | 2.01039400  |
| H | 2.68062900  | 0.43114600 | 1.10440900  |
| H | 3.36203000  | 1.98950700 | 0.66234300  |
| H | 3.87884800  | 2.49244400 | 3.03458700  |
| H | 4.62089900  | 0.97324600 | 2.54246400  |
| H | 1.00340800  | 0.79949500 | 4.90329900  |
| H | -0.28106900 | 1.80352900 | 3.03197400  |
| C | -3.38099800 | 4.56119900 | 1.85259800  |
| C | -3.58335800 | 3.50671200 | 0.75632600  |
| C | -2.38125300 | 2.55527300 | 0.64234600  |
| C | -1.06742900 | 3.33949800 | 0.43101600  |
| C | -0.86185500 | 4.38941900 | 1.54775600  |
| C | -2.07330800 | 5.33515300 | 1.63816300  |
| H | -3.35080000 | 4.06551700 | 2.83396400  |
| H | -4.23120800 | 5.25371700 | 1.87804000  |
| H | -3.73681100 | 4.01233600 | -0.20871000 |
| H | -2.29946500 | 1.94521100 | 1.55124000  |
| H | -1.15846100 | 3.88196000 | -0.52160800 |
| H | -0.73811500 | 3.88160400 | 2.51209600  |
| H | 0.04963600  | 4.97225800 | 1.37743800  |
| H | -2.14381700 | 5.92393200 | 0.71180400  |
| H | -1.91246900 | 6.05285500 | 2.45231300  |
| H | -4.49217700 | 2.92296200 | 0.94728500  |
| H | -2.53352100 | 1.84945300 | -0.17877900 |
| C | 2.27558000  | 5.10518900 | -3.17512100 |
| C | 1.74950300  | 3.72224200 | -3.58320200 |
| C | 0.79512700  | 3.14185200 | -2.52651700 |
| C | 1.47968200  | 3.08980200 | -1.14071700 |

|   |             |            |             |
|---|-------------|------------|-------------|
| C | 1.97468100  | 4.49115900 | -0.72421300 |
| C | 2.92950000  | 5.06657200 | -1.78667400 |
| H | 1.44177300  | 5.82301300 | -3.16246700 |
| H | 2.99203800  | 5.47318500 | -3.91963200 |
| H | 2.59075200  | 3.02838800 | -3.71446400 |
| H | -0.11108300 | 3.76369300 | -2.47912600 |
| H | 2.34348500  | 2.42423200 | -1.24361900 |
| H | 1.11840100  | 5.17022400 | -0.61218200 |
| H | 2.48253500  | 4.45513400 | 0.24706000  |
| H | 3.83640900  | 4.44681700 | -1.82701900 |
| H | 3.24911100  | 6.07196400 | -1.48506100 |
| H | 1.23419100  | 3.77974600 | -4.54981500 |
| H | 0.47943000  | 2.13936400 | -2.82889900 |

13

0 imaginary frequency

H = -5684.947857

G = -5685.074989

Esol = -5685.815847

|    |             |             |            |
|----|-------------|-------------|------------|
| Se | 0.94481600  | -1.02400900 | 1.13819600 |
| N  | 0.26454800  | 0.23383300  | 2.20887700 |
| N  | 0.65536000  | -2.70057200 | 2.16243500 |
| S  | -1.21769100 | 0.01170800  | 2.85786400 |
| O  | -1.73737800 | -1.36230000 | 2.60896200 |
| S  | 0.74951300  | -4.01959200 | 1.13784400 |
| C  | 2.83922800  | -0.83792900 | 1.91015300 |
| C  | 2.82006000  | -1.06344100 | 3.36648200 |
| C  | 2.62969100  | -0.07223300 | 4.25153700 |
| H  | 2.89737900  | -2.09227300 | 3.70693400 |

|   |             |             |             |
|---|-------------|-------------|-------------|
| H | 2.52101600  | 0.94606200  | 3.88079300  |
| H | -0.26012300 | -2.61461300 | 2.62757600  |
| H | 3.09237200  | 0.17829700  | 1.61315200  |
| C | 2.51522500  | -0.25273900 | 5.73227500  |
| H | 1.51282200  | 0.05098100  | 6.06216300  |
| H | 2.67436600  | -1.29391400 | 6.03008900  |
| H | 3.23455400  | 0.37896700  | 6.26991300  |
| C | -2.35317700 | 1.11837500  | 1.99499100  |
| C | -2.22743000 | 2.49852600  | 2.18594600  |
| C | -3.36778000 | 0.58684200  | 1.19778300  |
| C | -3.11237300 | 3.36203500  | 1.54940000  |
| H | -1.45394800 | 2.88731100  | 2.83920300  |
| C | -4.26603600 | 1.44648100  | 0.56680500  |
| H | -3.45686100 | -0.48821100 | 1.09173100  |
| C | -4.11704200 | 2.81943200  | 0.74712800  |
| H | -3.04783400 | 4.43600600  | 1.67226500  |
| H | -5.07364200 | 1.07216300  | -0.05026000 |
| N | -5.05771000 | 3.73172000  | 0.07317000  |
| O | -4.90000100 | 4.94015300  | 0.24350700  |
| O | -5.93973300 | 3.23013900  | -0.62208900 |
| C | -0.63411700 | -3.86661200 | -0.01200700 |
| C | -0.38487300 | -3.40870900 | -1.30750100 |
| C | -1.92743100 | -4.17287800 | 0.41991200  |
| C | -1.45065500 | -3.24036800 | -2.18799900 |
| H | 0.63391600  | -3.20936000 | -1.61935500 |
| C | -2.99636500 | -4.00206300 | -0.45543900 |
| H | -2.09728900 | -4.54806300 | 1.42350100  |
| C | -2.73770100 | -3.52861700 | -1.74124700 |
| H | -1.30058200 | -2.89733000 | -3.20384600 |
| H | -4.01369800 | -4.22636600 | -0.15986000 |

|   |             |             |             |
|---|-------------|-------------|-------------|
| N | -3.86846500 | -3.32582000 | -2.66748100 |
| O | -4.99073700 | -3.62988300 | -2.26979000 |
| O | -3.61627000 | -2.85850000 | -3.77729100 |
| O | 1.97416300  | -3.78625200 | 0.35636000  |
| O | 0.53903000  | -5.22720300 | 1.93175300  |
| O | -1.17192400 | 0.51203600  | 4.23630500  |
| H | 3.39372100  | -1.57594200 | 1.32905300  |
| P | 1.85724000  | 1.10282300  | -1.13148700 |
| C | 5.39757400  | -1.12153200 | -3.47220600 |
| C | 5.71192600  | -0.29557200 | -2.21849500 |
| C | 4.43937000  | -0.00975700 | -1.40519500 |
| C | 3.35444000  | 0.70579600  | -2.24538600 |
| C | 3.03930500  | -0.14784700 | -3.49219800 |
| C | 4.30726100  | -0.44615000 | -4.31352200 |
| H | 5.05598900  | -2.12212600 | -3.16931900 |
| H | 6.30408400  | -1.26893600 | -4.07227900 |
| H | 6.17603000  | 0.65713100  | -2.51390100 |
| H | 4.02395800  | -0.96133800 | -1.04249500 |
| H | 3.76117100  | 1.66657600  | -2.59539400 |
| H | 2.58331200  | -1.09983100 | -3.17974100 |
| H | 2.31148500  | 0.35443800  | -4.13730200 |
| H | 4.69628800  | 0.49804600  | -4.72232200 |
| H | 4.04506600  | -1.07278600 | -5.17547000 |
| H | 6.44398400  | -0.81725400 | -1.58925300 |
| H | 4.69256700  | 0.57560700  | -0.51412900 |
| C | 2.59957600  | 5.14145400  | 1.25600900  |
| C | 1.25278600  | 4.95459100  | 0.54653800  |
| C | 1.01310800  | 3.48693900  | 0.15289100  |
| C | 2.16121800  | 2.92234500  | -0.71228500 |
| C | 3.51314800  | 3.12233700  | 0.00833700  |

|   |             |             |             |
|---|-------------|-------------|-------------|
| C | 3.74626500  | 4.59219600  | 0.39822700  |
| H | 2.58008600  | 4.61107000  | 2.21950500  |
| H | 2.76814700  | 6.20108000  | 1.48500400  |
| H | 1.22917900  | 5.58139200  | -0.35718800 |
| H | 0.91238700  | 2.87162700  | 1.05752900  |
| H | 2.19998700  | 3.48417400  | -1.65730200 |
| H | 3.53532400  | 2.50392900  | 0.91831200  |
| H | 4.34171800  | 2.78343600  | -0.62309600 |
| H | 3.83800400  | 5.19649400  | -0.51628100 |
| H | 4.70238200  | 4.68347700  | 0.92908500  |
| H | 0.43120100  | 5.30227300  | 1.18587500  |
| H | 0.05943400  | 3.41021400  | -0.37978400 |
| C | -2.17727900 | 1.86541000  | -3.62626700 |
| C | -2.10176800 | 0.71138400  | -2.61580300 |
| C | -0.96095900 | 0.91941600  | -1.60578400 |
| C | 0.39181500  | 1.11079100  | -2.32739400 |
| C | 0.31467300  | 2.28202200  | -3.32715900 |
| C | -0.83183900 | 2.08044100  | -4.33435900 |
| H | -2.45956300 | 2.78862800  | -3.09905200 |
| H | -2.96733100 | 1.67335900  | -4.36218300 |
| H | -1.94964500 | -0.23492300 | -3.15533600 |
| H | -1.18859600 | 1.79851700  | -0.99008700 |
| H | 0.55299000  | 0.19174700  | -2.90859700 |
| H | 0.14637700  | 3.22001800  | -2.78099900 |
| H | 1.26555300  | 2.40100000  | -3.86177900 |
| H | -0.60906300 | 1.20676800  | -4.96474300 |
| H | -0.88963300 | 2.94415600  | -5.00885900 |
| H | -3.05554200 | 0.61374500  | -2.08323800 |
| H | -0.89739600 | 0.07284900  | -0.91164100 |

14

0 imaginary frequency

H = -4480.691187

G = -4480.768071

Esol = -4480.932677

|    |             |             |             |
|----|-------------|-------------|-------------|
| Se | 0.25879600  | -1.81406300 | -1.26182300 |
| N  | -0.28904900 | -0.28756200 | -0.63795900 |
| N  | 1.36894500  | -2.55602800 | -0.20194800 |
| S  | -1.32060500 | 0.51783900  | -1.73820700 |
| O  | -1.55425100 | -0.35029100 | -2.90482500 |
| O  | -0.78002700 | 1.86512200  | -1.89865100 |
| S  | 1.80714700  | -1.99019200 | 1.37211300  |
| O  | 2.60257300  | -3.08106500 | 1.92297800  |
| O  | 0.62825400  | -1.47398900 | 2.06485200  |
| C  | 2.91114700  | -0.63210400 | 0.97381600  |
| C  | 4.25983800  | -0.91897800 | 0.73920000  |
| C  | 2.40751300  | 0.67026500  | 0.91805100  |
| C  | 5.12698200  | 0.12421300  | 0.42987600  |
| H  | 4.61934500  | -1.93930400 | 0.81316700  |
| C  | 3.27646700  | 1.71434200  | 0.60769500  |
| H  | 1.35894000  | 0.85640000  | 1.11482800  |
| C  | 4.61626000  | 1.42001300  | 0.36753700  |
| H  | 6.17964100  | -0.04724200 | 0.24301000  |
| H  | 2.93348200  | 2.73983300  | 0.55192300  |
| N  | 5.53802800  | 2.52886200  | 0.03949800  |
| O  | 6.71203700  | 2.24139700  | -0.18232000 |
| O  | 5.06991700  | 3.66427100  | 0.00966900  |
| C  | -2.83527000 | 0.61462200  | -0.78293700 |
| C  | -3.88967500 | -0.24482900 | -1.09770100 |

|   |             |             |             |
|---|-------------|-------------|-------------|
| C | -2.93015100 | 1.56431500  | 0.23819800  |
| C | -5.07095000 | -0.15944100 | -0.36464200 |
| H | -3.78863500 | -0.95435000 | -1.91138300 |
| C | -4.10847100 | 1.64710500  | 0.97374100  |
| H | -2.10135100 | 2.23218800  | 0.44455500  |
| C | -5.15456700 | 0.78173800  | 0.65847000  |
| H | -5.91792900 | -0.80062800 | -0.57436000 |
| H | -4.22935600 | 2.36549100  | 1.77479000  |
| N | -6.40795400 | 0.87097300  | 1.43815500  |
| O | -6.45992500 | 1.71420600  | 2.32988300  |
| O | -7.31388200 | 0.09561200  | 1.14227400  |

15

0 imaginary frequency

H = -4637.918598

G = -4638.006412

Esol = -4638.278069

|    |             |             |             |
|----|-------------|-------------|-------------|
| Se | -1.47558800 | -0.76472400 | -0.77010200 |
| N  | -1.19205700 | -2.02300700 | 0.45626400  |
| N  | -2.63284300 | 0.41773100  | 0.20942200  |
| S  | -0.09135900 | -1.53451300 | 1.59407900  |
| O  | -0.21680900 | -0.06693800 | 1.81278300  |
| S  | -2.76340700 | 1.94188900  | -0.51711100 |
| C  | -2.95077100 | -1.77073900 | -1.71987200 |
| C  | -4.04130300 | -2.15144100 | -0.79565100 |
| C  | -4.11995200 | -3.35576000 | -0.21350300 |
| H  | -4.78332900 | -1.38731800 | -0.57921000 |
| H  | -3.34745800 | -4.09414800 | -0.42821300 |
| H  | -2.25045500 | 0.45503700  | 1.16381100  |



|   |             |             |             |
|---|-------------|-------------|-------------|
| H | -2.39170000 | -2.61849800 | -2.12270300 |
| C | -5.19753900 | -3.77930700 | 0.73487200  |
| H | -4.76510800 | -4.04412400 | 1.70867400  |
| H | -5.93748800 | -2.98826200 | 0.89093200  |
| H | -5.71721900 | -4.67398300 | 0.36736800  |
| C | 1.54355800  | -1.78916000 | 0.87065800  |
| C | 2.12984100  | -3.05402200 | 0.96486700  |
| C | 2.17660100  | -0.74198700 | 0.19572900  |
| C | 3.36552400  | -3.28138100 | 0.36590700  |
| H | 1.62673900  | -3.84105600 | 1.51585700  |
| C | 3.41321700  | -0.96410500 | -0.40565800 |
| H | 1.71763200  | 0.24004200  | 0.16759100  |
| C | 3.98188500  | -2.23282900 | -0.31525500 |
| H | 3.85489500  | -4.24591400 | 0.41977800  |
| H | 3.94153500  | -0.17745800 | -0.93011700 |
| N | 5.28756200  | -2.47262400 | -0.95833700 |
| O | 5.77604100  | -3.59601900 | -0.85175600 |
| O | 5.80326600  | -1.53532600 | -1.56493200 |
| C | -1.18209300 | 2.76089800  | -0.25534900 |
| C | -0.17869300 | 2.62356700  | -1.21849400 |
| C | -0.97677400 | 3.47716200  | 0.92566000  |
| C | 1.06316600  | 3.21156700  | -0.99019700 |
| H | -0.37830300 | 2.09088500  | -2.14128600 |
| C | 0.26355800  | 4.06681900  | 1.15531400  |
| H | -1.78033600 | 3.58502700  | 1.64607300  |
| C | 1.26130800  | 3.91663600  | 0.19523400  |
| H | 1.86660500  | 3.14365400  | -1.71328700 |
| H | 0.46539500  | 4.63303200  | 2.05590900  |
| N | 2.58026700  | 4.53850400  | 0.43645900  |
| O | 2.71622900  | 5.19664900  | 1.46434000  |

|   |             |             |             |
|---|-------------|-------------|-------------|
| O | 3.45457000  | 4.35371500  | -0.40761400 |
| O | -2.86949000 | 1.62399600  | -1.94814600 |
| O | -3.78399700 | 2.68863900  | 0.20928800  |
| O | -0.21079000 | -2.45948800 | 2.71982500  |
| H | -3.23701500 | -1.07588100 | -2.51170100 |

16

0 imaginary frequency

H = -4637.945978

G = -4638.033387

Esol = -4638.306731

|    |             |             |             |
|----|-------------|-------------|-------------|
| Se | -0.32732300 | -0.28035400 | 1.00664800  |
| N  | -1.22965900 | -1.37001000 | -0.19611800 |
| N  | 1.29632100  | -0.01493200 | 0.13650400  |
| S  | -1.89040400 | -0.56303200 | -1.53761700 |
| O  | -0.85005000 | 0.37461600  | -1.97826300 |
| S  | 2.47392500  | -1.26084600 | 0.17603200  |
| C  | -4.05972700 | -3.14902200 | 1.08140600  |
| C  | -2.85352900 | -2.60014900 | 1.22133700  |
| C  | -1.73468300 | -2.72080500 | 0.21535400  |
| H  | -2.60859700 | -2.04340400 | 2.12853400  |
| H  | -2.11180100 | -3.17352200 | -0.70528400 |
| H  | 1.12332300  | 0.31244800  | -0.81892200 |
| H  | -4.32802300 | -3.71937100 | 0.19423800  |
| C  | -0.56687000 | -3.56009100 | 0.74378500  |
| H  | 0.22750000  | -3.62353400 | -0.00507000 |
| H  | -0.14348600 | -3.13004500 | 1.65561600  |
| H  | -0.92613800 | -4.56863100 | 0.97128300  |
| C  | -3.26045700 | 0.43987800  | -0.93553800 |

|   |             |             |             |
|---|-------------|-------------|-------------|
| C | -4.56206600 | -0.04970300 | -1.06199400 |
| C | -2.99402800 | 1.68127600  | -0.34763300 |
| C | -5.62499900 | 0.71352400  | -0.58531300 |
| H | -4.73560000 | -1.00654800 | -1.54020000 |
| C | -4.05501000 | 2.44069600  | 0.13797700  |
| H | -1.97544800 | 2.04111700  | -0.27260700 |
| C | -5.34999000 | 1.94184400  | 0.01110600  |
| H | -6.65018900 | 0.37539900  | -0.66963400 |
| H | -3.89637300 | 3.40758300  | 0.59895300  |
| N | -6.47489000 | 2.75017300  | 0.52312000  |
| O | -7.60766000 | 2.28969100  | 0.39763300  |
| O | -6.20612900 | 3.83041300  | 1.04460900  |
| C | 3.98082600  | -0.28046200 | 0.08678000  |
| C | 4.44585900  | 0.35382300  | 1.24194300  |
| C | 4.66357100  | -0.19680400 | -1.12738500 |
| C | 5.61610500  | 1.10310900  | 1.17769100  |
| H | 3.90454500  | 0.25063400  | 2.17588800  |
| C | 5.83599300  | 0.55408600  | -1.19463200 |
| H | 4.28665200  | -0.72150000 | -1.99831300 |
| C | 6.28666200  | 1.19150500  | -0.04188000 |
| H | 6.01565600  | 1.61062300  | 2.04673100  |
| H | 6.39938600  | 0.64686500  | -2.11468700 |
| N | 7.52831400  | 1.98904400  | -0.11137600 |
| O | 8.10308300  | 2.05045900  | -1.19592500 |
| O | 7.90569600  | 2.54111300  | 0.91999400  |
| O | 2.38136400  | -1.85943100 | 1.50657600  |
| O | 2.40956900  | -2.08056900 | -1.03734800 |
| O | -2.43765500 | -1.58871200 | -2.42496900 |
| H | -4.82106600 | -3.06081900 | 1.85143400  |

17

0 imaginary frequency

H = -5684.989705

G = -5685.116704

Esol = -5685.859561

|    |             |             |             |
|----|-------------|-------------|-------------|
| Se | -0.54755800 | 0.05221200  | 0.74361900  |
| N  | 1.36831200  | -1.10683500 | 1.58725700  |
| N  | 0.68310000  | 1.08633300  | -0.24441600 |
| S  | 2.31922100  | -1.88181600 | 0.55725700  |
| O  | 2.31951300  | -1.06733400 | -0.69713400 |
| S  | 1.24072600  | 2.51011300  | 0.52826700  |
| C  | 0.61035800  | -3.88995600 | 3.72235800  |
| C  | 0.33200600  | -2.70960300 | 3.16936900  |
| C  | 1.31558000  | -1.57405400 | 2.99195600  |
| H  | -0.67963200 | -2.50489600 | 2.81190700  |
| H  | 2.31318300  | -1.92362400 | 3.28901200  |
| H  | 1.45590500  | 0.42679800  | -0.48513500 |
| H  | 1.60966900  | -4.12772800 | 4.08177000  |
| C  | 0.93461400  | -0.38230200 | 3.88355100  |
| H  | 1.64954700  | 0.43445300  | 3.75569000  |
| H  | -0.05274600 | 0.00562000  | 3.61440500  |
| H  | 0.91434200  | -0.69028500 | 4.93418000  |
| C  | 1.56783400  | -3.44924800 | 0.02037500  |
| C  | 2.35028400  | -4.60266300 | -0.03887900 |
| C  | 0.22401900  | -3.46832600 | -0.36830500 |
| C  | 1.78956500  | -5.79326800 | -0.49870600 |
| H  | 3.38659000  | -4.55755700 | 0.27675700  |
| C  | -0.34272500 | -4.65046300 | -0.82824100 |
| H  | -0.36975900 | -2.56416000 | -0.28343500 |

|   |             |             |             |
|---|-------------|-------------|-------------|
| C | 0.45220200  | -5.79617000 | -0.88810400 |
| H | 2.36669000  | -6.70776900 | -0.55856400 |
| H | -1.37930300 | -4.70517300 | -1.13669900 |
| N | -0.14751000 | -7.04850900 | -1.37336200 |
| O | 0.56780500  | -8.04876200 | -1.41675300 |
| O | -1.33302300 | -7.02314400 | -1.70831900 |
| C | 2.98127400  | 2.50473600  | 0.07621700  |
| C | 3.44251800  | 3.46454400  | -0.82573700 |
| C | 3.83139600  | 1.56451700  | 0.66452400  |
| C | 4.79602800  | 3.48601200  | -1.15325300 |
| H | 2.74961700  | 4.17950300  | -1.25476000 |
| C | 5.18302200  | 1.58095000  | 0.33186100  |
| H | 3.44677700  | 0.82651900  | 1.36008900  |
| C | 5.63810700  | 2.54288400  | -0.56814900 |
| H | 5.20285900  | 4.21204200  | -1.84577000 |
| H | 5.87395900  | 0.86155500  | 0.75270600  |
| N | 7.07344400  | 2.56657900  | -0.91788900 |
| O | 7.80585100  | 1.74660000  | -0.36984300 |
| O | 7.44477700  | 3.40829300  | -1.73449200 |
| O | 0.57997800  | 3.63733600  | -0.15323300 |
| O | 1.12066900  | 2.41654400  | 1.98838000  |
| O | 3.62866700  | -2.25107800 | 1.13026900  |
| H | -0.14299300 | -4.66537000 | 3.83541100  |
| P | -2.36053700 | 1.19763500  | -0.31065400 |
| C | -6.14727400 | -1.61576500 | 0.43781900  |
| C | -4.83648700 | -1.85286300 | 1.20086400  |
| C | -3.93864900 | -0.60537300 | 1.17939700  |
| C | -3.66631200 | -0.14091600 | -0.27203300 |
| C | -4.98571300 | 0.11178900  | -1.03275400 |
| C | -5.87796500 | -1.14301700 | -0.99769700 |

|   |             |             |             |
|---|-------------|-------------|-------------|
| H | -6.74238100 | -0.85601900 | 0.96549600  |
| H | -6.74950400 | -2.53199100 | 0.42727000  |
| H | -4.29517800 | -2.69524600 | 0.74692300  |
| H | -4.42912500 | 0.20234900  | 1.73831400  |
| H | -3.14605300 | -0.96511900 | -0.78233000 |
| H | -5.52549500 | 0.95193500  | -0.58110500 |
| H | -4.78257100 | 0.38702000  | -2.07294400 |
| H | -5.38729100 | -1.94994800 | -1.56097100 |
| H | -6.82179900 | -0.93187900 | -1.51496000 |
| H | -5.04241900 | -2.13720200 | 2.23968500  |
| H | -2.99289500 | -0.81417300 | 1.69512500  |
| C | -1.79623800 | 1.58419400  | -5.01472300 |
| C | -0.87278300 | 0.67252900  | -4.19423300 |
| C | -1.48976600 | 0.32627200  | -2.83022400 |
| C | -1.85568100 | 1.61093300  | -2.05472200 |
| C | -2.79544800 | 2.52771600  | -2.86624200 |
| C | -2.16496700 | 2.85366600  | -4.23367900 |
| H | -2.71482100 | 1.03577000  | -5.27181900 |
| H | -1.31816300 | 1.85289100  | -5.96450800 |
| H | 0.09161000  | 1.17343400  | -4.03254000 |
| H | -2.39027900 | -0.28463500 | -2.98930200 |
| H | -0.92257700 | 2.16215300  | -1.87698700 |
| H | -3.76708400 | 2.04222100  | -3.02442800 |
| H | -2.98661800 | 3.46025800  | -2.32392300 |
| H | -0.65732400 | -0.25157300 | -4.74377100 |
| H | -0.79170800 | -0.26710400 | -2.23130400 |
| C | -4.09784000 | 4.62953800  | 2.52968700  |
| C | -4.44578400 | 4.66407400  | 1.03509100  |
| C | -4.26326000 | 3.28297200  | 0.37940800  |
| C | -2.82063800 | 2.77242100  | 0.59175300  |

|   |             |            |             |
|---|-------------|------------|-------------|
| C | -2.49105200 | 2.69756900 | 2.10268800  |
| C | -2.68669500 | 4.07190300 | 2.76195400  |
| H | -4.83011500 | 3.99857900 | 3.05528000  |
| H | -4.18607900 | 5.63418200 | 2.96090800  |
| H | -3.80014200 | 5.39243000 | 0.52387400  |
| H | -4.96832000 | 2.57798500 | 0.83969400  |
| H | -2.12029800 | 3.49311800 | 0.14315900  |
| H | -3.15437400 | 1.96475500 | 2.58393900  |
| H | -1.46756800 | 2.34897800 | 2.25611600  |
| H | -1.94142300 | 4.76833400 | 2.35314000  |
| H | -2.47952100 | 3.99072900 | 3.83577100  |
| H | -5.47884800 | 5.00329800 | 0.88811700  |
| H | -4.51712400 | 3.33731000 | -0.68446800 |
| H | -1.26122000 | 3.45843200 | -4.07352800 |
| H | -2.85859900 | 3.47434100 | -4.81438600 |

18

0 imaginary frequency

H = -5914.134310

G = -5914.273010

Esol = -5915.072093

|    |             |             |             |
|----|-------------|-------------|-------------|
| Se | -0.29069500 | 0.83344000  | -0.90837600 |
| N  | -2.39068500 | -0.80626600 | -2.31140800 |
| N  | 0.72396100  | -0.69100800 | -0.59294500 |
| S  | -3.73058700 | 0.11077300  | -1.85725800 |
| O  | -4.86228000 | -0.07454700 | -2.77758000 |
| O  | -3.27789400 | 1.49529900  | -1.60776400 |
| S  | 1.78204100  | -1.20125900 | -1.79402700 |
| O  | 2.31191700  | -0.01715000 | -2.49312700 |

|   |             |             |             |
|---|-------------|-------------|-------------|
| O | 1.21493300  | -2.30088800 | -2.58155400 |
| C | -2.50752600 | -3.22302700 | -4.89067000 |
| C | -1.82199000 | -2.41516600 | -4.08252000 |
| C | -2.22912600 | -0.99205300 | -3.79550100 |
| H | -0.90054800 | -2.75108300 | -3.61159800 |
| H | -3.20088100 | -0.81164200 | -4.26756300 |
| H | 0.11194300  | -1.53461000 | -0.13328100 |
| H | -2.17051800 | -4.23457600 | -5.10101500 |
| H | -3.43160800 | -2.90806400 | -5.37194600 |
| C | -1.21147200 | 0.02274600  | -4.34026700 |
| H | -1.46055800 | 1.03633300  | -4.00805700 |
| H | -0.19609600 | -0.21593800 | -4.01049100 |
| H | -1.22317100 | 0.00282500  | -5.43558900 |
| C | 3.12081600  | -1.90359600 | -0.80467200 |
| C | 2.83498900  | -2.79212500 | 0.23864900  |
| C | 4.43238000  | -1.58909400 | -1.16607600 |
| C | 3.89306600  | -3.35912200 | 0.94466500  |
| H | 1.80532800  | -3.02236600 | 0.50654300  |
| C | 5.49029400  | -2.16238700 | -0.46355600 |
| H | 4.61652800  | -0.90487500 | -1.98688900 |
| C | 5.20032000  | -3.03430900 | 0.58270500  |
| H | 3.71982400  | -4.04610100 | 1.76382100  |
| H | 6.52188400  | -1.94587500 | -0.71172900 |
| C | -4.18491700 | -0.60194600 | -0.26515300 |
| C | -5.46038100 | -1.14713000 | -0.12567500 |
| C | -3.29038700 | -0.53005700 | 0.80445600  |
| C | -5.85675900 | -1.63187200 | 1.11935400  |
| H | -6.12493300 | -1.18618300 | -0.98132500 |
| C | -3.67971100 | -1.01797800 | 2.04586100  |
| H | -2.30038700 | -0.12056500 | 0.64582800  |



|   |             |             |             |
|---|-------------|-------------|-------------|
| C | -4.95932900 | -1.55511700 | 2.18158300  |
| H | -6.83796900 | -2.06226900 | 1.27545700  |
| H | -3.01414400 | -0.99624000 | 2.89924900  |
| N | 6.31779100  | -3.62992200 | 1.33858000  |
| N | -5.37718100 | -2.05939600 | 3.50259000  |
| O | 6.03856200  | -4.39068800 | 2.26355500  |
| O | -4.57501600 | -1.95886200 | 4.43089900  |
| O | 7.46080500  | -3.32507200 | 1.00048600  |
| O | -6.50234300 | -2.54574400 | 3.59917100  |
| O | -0.35089900 | -2.62213700 | 0.62665800  |
| C | -1.30720900 | -3.36973100 | 0.18311000  |
| O | -2.10233100 | -3.08033900 | -0.72957500 |
| C | -1.43291200 | -4.72515900 | 0.87112500  |
| H | -2.35676700 | -5.22520100 | 0.57441200  |
| H | -0.58060000 | -5.35555000 | 0.59036600  |
| H | -1.40131200 | -4.60390300 | 1.95883300  |
| H | -2.31032000 | -1.68468200 | -1.74762000 |
| P | 0.83513300  | 2.22144100  | 0.52434500  |
| C | 1.60822500  | 0.34950500  | 4.82348200  |
| C | 2.69600500  | 1.22192200  | 4.18244300  |
| C | 2.12019900  | 2.10734900  | 3.06275300  |
| C | 1.41689500  | 1.23813500  | 1.99403600  |
| C | 0.30060800  | 0.37905200  | 2.63020300  |
| C | 0.87095500  | -0.48540400 | 3.76848700  |
| H | 0.88866700  | 0.99592500  | 5.34732000  |
| H | 2.04984300  | -0.30510900 | 5.58413700  |
| H | 3.48539000  | 0.58080200  | 3.76500300  |
| H | 1.39269200  | 2.80224000  | 3.50260500  |
| H | 2.15081200  | 0.54932200  | 1.55561700  |
| H | -0.48796400 | 1.03331400  | 3.02953800  |

|   |             |             |             |
|---|-------------|-------------|-------------|
| H | -0.15399800 | -0.27475300 | 1.88302900  |
| H | 1.55640300  | -1.22665000 | 3.33539600  |
| H | 0.05487300  | -1.05382200 | 4.22927500  |
| H | 3.17490300  | 1.85848000  | 4.93638200  |
| H | 2.91720600  | 2.71671100  | 2.62084700  |
| C | -2.00908400 | 6.01434400  | 1.08675200  |
| C | -0.91475100 | 5.73615000  | 2.12649500  |
| C | 0.18022900  | 4.81035500  | 1.56617200  |
| C | -0.43759100 | 3.48803000  | 1.05457100  |
| C | -1.51051800 | 3.77629500  | -0.02424600 |
| C | -2.59747700 | 4.70888500  | 0.53576100  |
| H | -1.58115000 | 6.59898800  | 0.25932900  |
| H | -2.80003700 | 6.63201800  | 1.52870100  |
| H | -1.36165500 | 5.26845700  | 3.01563700  |
| H | 0.68312700  | 5.32015900  | 0.73368400  |
| H | -0.93891400 | 2.98980900  | 1.89715100  |
| H | -1.03843900 | 4.25623200  | -0.89161700 |
| H | -1.98144400 | 2.85783600  | -0.38406700 |
| H | -3.14260700 | 4.18463100  | 1.33383100  |
| H | -3.32878300 | 4.91530300  | -0.25357200 |
| H | -0.45591300 | 6.67345200  | 2.46406200  |
| H | 0.94036200  | 4.62782700  | 2.33337300  |
| C | 4.31916600  | 3.40191800  | -2.43468900 |
| C | 4.70858300  | 2.97258600  | -1.01412100 |
| C | 3.56071300  | 2.22062100  | -0.31762600 |
| C | 2.27884000  | 3.08199900  | -0.29211700 |
| C | 1.88465400  | 3.53899300  | -1.71817100 |
| C | 3.04896200  | 4.26138600  | -2.41513600 |
| H | 4.14114000  | 2.50776000  | -3.04717600 |
| H | 5.14275700  | 3.95363000  | -2.90385700 |

|   |            |            |             |
|---|------------|------------|-------------|
| H | 4.98101200 | 3.85926900 | -0.42223700 |
| H | 3.36006000 | 1.29580200 | -0.86641900 |
| H | 2.46749200 | 3.96954100 | 0.32867100  |
| H | 1.58575100 | 2.65725600 | -2.29589400 |
| H | 1.01342200 | 4.20388800 | -1.67838700 |
| H | 3.25522100 | 5.20923500 | -1.89607100 |
| H | 2.74599300 | 4.52327400 | -3.43585700 |
| H | 5.59609100 | 2.32841000 | -1.03624900 |
| H | 3.86595200 | 1.94771500 | 0.69867900  |

19

0 imaginary frequency

H = -5914.133665

G = -5914.272776

Esol = -5915.073906

|    |             |             |             |
|----|-------------|-------------|-------------|
| Se | 0.60769700  | 0.36779400  | 0.59018000  |
| N  | 2.15406600  | -3.56802500 | 0.77549600  |
| N  | -1.20223600 | 0.58472500  | 0.24848900  |
| S  | 1.09509000  | -4.69412200 | 0.11490800  |
| O  | 0.03432700  | -5.04329500 | 1.07294700  |
| O  | 1.89707300  | -5.75388600 | -0.50776500 |
| S  | -1.96563800 | 1.42186500  | 1.42141100  |
| O  | -1.95238500 | 2.89471600  | 1.23426500  |
| O  | -1.61854500 | 0.99344300  | 2.81436700  |
| C  | 4.95909500  | -2.59508300 | 2.73477100  |
| C  | 3.80396700  | -3.22068000 | 2.50755900  |
| C  | 3.46203900  | -4.06832600 | 1.30228700  |
| H  | 3.01006300  | -3.14966100 | 3.25131500  |
| H  | 3.33800800  | -5.10192800 | 1.65850100  |

|   |             |             |             |
|---|-------------|-------------|-------------|
| H | -1.30997200 | -0.56310400 | 3.38040800  |
| H | 5.11901400  | -2.03262000 | 3.65048600  |
| H | 5.79128800  | -2.63042900 | 2.03780100  |
| C | 4.51782900  | -4.06935700 | 0.19769500  |
| H | 4.18619100  | -4.70324600 | -0.62676200 |
| H | 4.68067300  | -3.05478800 | -0.18116000 |
| H | 5.46778300  | -4.46517600 | 0.57317600  |
| C | -3.65828000 | 0.87997100  | 1.10362100  |
| C | -4.11107400 | -0.32608000 | 1.64481600  |
| C | -4.49337800 | 1.69186900  | 0.33484000  |
| C | -5.41879200 | -0.73487800 | 1.40092900  |
| H | -3.45637100 | -0.93213500 | 2.26122200  |
| C | -5.80246200 | 1.28706900  | 0.08526700  |
| H | -4.11857700 | 2.63371500  | -0.04916100 |
| C | -6.24051200 | 0.07851500  | 0.62170000  |
| H | -5.80876800 | -1.66129000 | 1.80362700  |
| H | -6.48112400 | 1.88763900  | -0.50736000 |
| C | 0.31040200  | -3.73646700 | -1.19359500 |
| C | -0.51908000 | -2.66260400 | -0.86167900 |
| C | 0.52668900  | -4.11691000 | -2.51908700 |
| C | -1.15009800 | -1.95051800 | -1.87706900 |
| H | -0.67944800 | -2.37874700 | 0.17174400  |
| C | -0.09699200 | -3.40418100 | -3.54003300 |
| H | 1.17145000  | -4.96086200 | -2.73715400 |
| C | -0.92651100 | -2.33718300 | -3.19798600 |
| H | -1.78393900 | -1.10439800 | -1.64148500 |
| H | 0.04448700  | -3.66286700 | -4.58210200 |
| N | -7.62664400 | -0.35188700 | 0.36374800  |
| N | -1.58383800 | -1.58222200 | -4.27613900 |
| O | -8.33550900 | 0.38618100  | -0.31914600 |

|   |             |             |             |
|---|-------------|-------------|-------------|
| O | -1.20548000 | -1.78335400 | -5.43064100 |
| O | -7.99076500 | -1.42287200 | 0.84721700  |
| O | -2.46942800 | -0.78759200 | -3.95944300 |
| O | -1.35803500 | -1.44913800 | 3.84790900  |
| C | -0.42564600 | -2.28080700 | 3.40748700  |
| O | 0.37654900  | -1.98378400 | 2.52333000  |
| C | -0.43385100 | -3.61796900 | 4.10393600  |
| H | 0.45622900  | -3.69160500 | 4.73989200  |
| H | -1.32231800 | -3.73796300 | 4.72554700  |
| H | -0.37553800 | -4.40945100 | 3.35183400  |
| H | 1.63068300  | -2.99086900 | 1.44711000  |
| P | 1.54503000  | 2.26475100  | -0.26115000 |
| C | -0.73103000 | 2.21685300  | -4.40519000 |
| C | 0.65328000  | 1.55971500  | -4.31031500 |
| C | 1.07354600  | 1.29576300  | -2.85415800 |
| C | 0.99045700  | 2.58783200  | -2.00935600 |
| C | -0.42573800 | 3.20487600  | -2.08114600 |
| C | -0.80761500 | 3.48466100  | -3.54453600 |
| H | -1.49553900 | 1.50260000  | -4.07505200 |
| H | -0.95909600 | 2.45448400  | -5.45126800 |
| H | 1.40205400  | 2.21169600  | -4.78486500 |
| H | 0.43194500  | 0.53911700  | -2.38847500 |
| H | 1.70817000  | 3.31979400  | -2.40810200 |
| H | -1.14274400 | 2.51065000  | -1.63018900 |
| H | -0.47540400 | 4.13308100  | -1.50185900 |
| H | -0.13375200 | 4.25210100  | -3.95547400 |
| H | -1.81882300 | 3.90793600  | -3.57832600 |
| H | 0.66382800  | 0.61587000  | -4.86877900 |
| H | 2.09219600  | 0.88804500  | -2.83416600 |
| C | 6.11302400  | 1.14976800  | -1.08957000 |

|   |             |             |             |
|---|-------------|-------------|-------------|
| C | 5.35138000  | 0.38352600  | -0.00022400 |
| C | 3.82693000  | 0.50918700  | -0.16066500 |
| C | 3.40320400  | 1.99674000  | -0.19982600 |
| C | 4.16028700  | 2.76025500  | -1.31194300 |
| C | 5.68202100  | 2.62174500  | -1.13281200 |
| H | 5.91750600  | 0.68540900  | -2.06708900 |
| H | 7.19403900  | 1.07686700  | -0.91973500 |
| H | 5.64110800  | 0.76945900  | 0.98799600  |
| H | 3.50932200  | 0.00725200  | -1.08341200 |
| H | 3.68373200  | 2.44338300  | 0.76426700  |
| H | 3.87985100  | 2.35347600  | -2.29210300 |
| H | 3.88289500  | 3.82049300  | -1.31634700 |
| H | 5.98383300  | 3.12033300  | -0.20030600 |
| H | 6.19191100  | 3.14914800  | -1.94825800 |
| H | 5.62739700  | -0.67727300 | -0.01121700 |
| H | 3.33270800  | -0.01489200 | 0.66496300  |
| C | 1.50628400  | 5.91804200  | 2.75980600  |
| C | 0.92666400  | 4.56263500  | 3.19155400  |
| C | 1.44914900  | 3.41816200  | 2.30910600  |
| C | 1.13080900  | 3.71252400  | 0.82532400  |
| C | 1.75874900  | 5.04962500  | 0.37743400  |
| C | 1.24747200  | 6.19554300  | 1.27144300  |
| H | 2.59110800  | 5.92554700  | 2.94500900  |
| H | 1.08118700  | 6.72484000  | 3.36926000  |
| H | -0.16878600 | 4.58281600  | 3.12463100  |
| H | 2.53702200  | 3.32438900  | 2.44858100  |
| H | 0.03825200  | 3.77979300  | 0.74307300  |
| H | 2.85370700  | 4.99367800  | 0.45776100  |
| H | 1.52533400  | 5.26666800  | -0.67230400 |
| H | 0.16852000  | 6.32046600  | 1.10550700  |

|   |            |            |            |
|---|------------|------------|------------|
| H | 1.72448200 | 7.13577800 | 0.96764900 |
| H | 1.17617100 | 4.35829900 | 4.23976700 |
| H | 1.00249900 | 2.46385000 | 2.60362400 |

2

0 imaginary frequency

H = -699.949848

G = -700.011963

Esol = -700.160805

|   |             |             |             |
|---|-------------|-------------|-------------|
| C | 0.24764900  | 2.31747000  | 0.00557700  |
| O | 0.22998800  | 1.28754700  | -0.86471200 |
| O | 0.20284600  | 2.21516800  | 1.21067600  |
| C | 0.33523600  | 3.62494400  | -0.76024100 |
| H | -0.35468000 | 3.62945400  | -1.60771300 |
| H | 0.11467100  | 4.44915300  | -0.08036100 |
| H | 1.35162600  | 3.73256600  | -1.15324800 |
| I | 0.35423300  | -0.59622700 | 0.00742000  |
| O | 2.84445700  | -1.90417900 | 0.47370300  |
| C | 3.29341100  | -0.81443000 | 0.09305100  |
| O | 2.53899000  | 0.17679900  | -0.28894200 |
| C | 4.78543700  | -0.52753200 | 0.04014700  |
| H | 5.34450700  | -1.42249100 | 0.32091400  |
| H | 5.07202900  | -0.20707900 | -0.96680000 |
| H | 5.02967300  | 0.29078100  | 0.72615600  |
| C | -1.81382900 | -0.49804200 | 0.00505500  |
| C | -2.53153600 | -1.12649900 | -1.01585300 |
| C | -2.47843700 | 0.12727700  | 1.06421300  |
| C | -3.92775300 | -1.13515300 | -0.97238600 |
| H | -2.01303900 | -1.60696700 | -1.84091500 |

|   |             |             |             |
|---|-------------|-------------|-------------|
| C | -3.87404200 | 0.11860000  | 1.09862400  |
| H | -1.91368900 | 0.62800800  | 1.84456800  |
| C | -4.59728100 | -0.51283500 | 0.08323600  |
| H | -4.48963900 | -1.62370500 | -1.76383200 |
| H | -4.39580200 | 0.60443300  | 1.91871900  |
| H | -5.68336200 | -0.51957800 | 0.11493300  |

20

0 imaginary frequency

H = -7055.022948

G = -7055.117625

Esol = -7055.306651

|    |             |             |             |
|----|-------------|-------------|-------------|
| Se | -0.41924400 | 1.14661700  | 0.16192500  |
| N  | 0.68425000  | 2.07865600  | 1.13486700  |
| N  | -0.85470700 | -0.05105500 | 1.36191700  |
| S  | 1.41821100  | 3.26980300  | 0.24488100  |
| O  | 1.86999700  | 4.29233300  | 1.17205800  |
| O  | 0.68152600  | 3.60884900  | -0.97458000 |
| S  | -2.04653100 | -1.05119000 | 0.79071100  |
| O  | -2.30946300 | -0.79307000 | -0.63886000 |
| O  | -3.15637200 | -1.11105000 | 1.72592200  |
| C  | -3.17853500 | 2.38416300  | -0.14390900 |
| C  | -5.34431000 | 2.00580300  | -0.55978500 |
| C  | -4.73716500 | 2.26499500  | -1.74580100 |
| H  | -6.37385000 | 1.78103700  | -0.33074800 |
| H  | -5.13536900 | 2.30111500  | -2.74733200 |
| N  | -4.37466100 | 2.07672700  | 0.42988000  |
| N  | -3.39717400 | 2.51328700  | -1.48255500 |
| C  | -4.56070000 | 1.84560000  | 1.86053100  |



|    |             |             |             |
|----|-------------|-------------|-------------|
| H  | -3.61795900 | 2.07294400  | 2.35809400  |
| H  | -5.34791400 | 2.50226900  | 2.23996300  |
| H  | -4.80903600 | 0.79768000  | 2.03873900  |
| C  | -2.33857300 | 2.76243800  | -2.45698100 |
| H  | -1.52992200 | 3.31260800  | -1.97297300 |
| H  | -1.95385500 | 1.81619000  | -2.84957100 |
| H  | -2.74394000 | 3.35873000  | -3.27689100 |
| O  | -2.07311400 | 2.54702700  | 0.47326500  |
| O  | -1.34917700 | -2.53141000 | 0.93877100  |
| C  | -0.24338100 | -2.82091000 | 0.08418900  |
| H  | -0.30617800 | -2.24979800 | -0.84605800 |
| H  | 0.69135700  | -2.60409400 | 0.60856900  |
| C  | -0.27246500 | -4.31247900 | -0.27559200 |
| Cl | 1.17382400  | -4.61392900 | -1.31497200 |
| Cl | -0.16989400 | -5.32010200 | 1.20370000  |
| Cl | -1.76347200 | -4.71449300 | -1.18528100 |
| O  | 2.76264700  | 2.50585000  | -0.37111600 |
| C  | 3.66072000  | 1.92360000  | 0.56972500  |
| H  | 3.17277200  | 1.72713300  | 1.52805800  |
| H  | 4.52281700  | 2.57970200  | 0.71837400  |
| C  | 4.15571200  | 0.58660300  | 0.00146700  |
| Cl | 5.00112100  | 0.83097900  | -1.55969400 |
| Cl | 2.76616400  | -0.54265500 | -0.24578000 |
| Cl | 5.29098500  | -0.12148900 | 1.20445900  |

21

0 imaginary frequency

H = -7139.582814

G = -7139.683224

Esol = -7139.954122

|    |             |             |             |
|----|-------------|-------------|-------------|
| Se | 1.00172800  | -0.07997600 | -0.48363200 |
| N  | 0.16438900  | 0.07054500  | 1.05412000  |
| N  | 1.95025800  | -1.50643600 | -0.08531100 |
| S  | -0.48488000 | 1.56830700  | 1.27365300  |
| O  | 0.29210900  | 2.62696600  | 0.61860200  |
| O  | -0.88597900 | 1.70011800  | 2.66366600  |
| S  | 3.06468900  | -1.84038800 | -1.27919800 |
| O  | 2.54541300  | -1.54865200 | -2.61568400 |
| O  | 3.65740800  | -3.12601500 | -0.94948000 |
| C  | -2.64588100 | -3.01299300 | 2.11577000  |
| C  | -1.54242600 | -2.93092900 | 1.09635600  |
| C  | -1.98296400 | -2.12272400 | -0.14005200 |
| C  | -3.34620800 | -2.66088400 | -0.64659000 |
| C  | -4.40330800 | -2.60487400 | 0.45853200  |
| C  | -3.95767600 | -2.84920900 | 1.85321100  |
| H  | -2.33653700 | -3.21848600 | 3.13995300  |
| H  | -0.65776800 | -2.46552500 | 1.54343600  |
| H  | -2.14882100 | -1.08866600 | 0.18101800  |
| H  | -3.72290300 | -2.09299500 | -1.50125600 |
| H  | -1.24501100 | -3.95192200 | 0.81264300  |
| H  | -3.24284300 | -3.70916200 | -0.96468300 |
| C  | -5.03298000 | -2.89913000 | 2.90509300  |
| H  | -4.60990000 | -3.10011100 | 3.89354800  |
| H  | -5.58080100 | -1.95104700 | 2.94437100  |
| H  | -5.77283100 | -3.67329800 | 2.67211500  |
| O  | -5.57517400 | -2.39571500 | 0.18098800  |
| C  | -0.98958300 | -2.10468800 | -1.26825600 |
| C  | -0.18793100 | -3.31888400 | -1.56744200 |
| H  | -1.39478300 | -0.06577500 | -1.80484500 |

|    |             |             |             |
|----|-------------|-------------|-------------|
| H  | -0.78115400 | -4.23584700 | -1.48759900 |
| H  | 0.29838500  | -3.27102100 | -2.54328300 |
| C  | -0.75761000 | -0.93328900 | -1.96242300 |
| H  | -0.14074700 | -0.94193800 | -2.85763300 |
| H  | 0.60917700  | -3.39031900 | -0.80306800 |
| O  | 4.20638500  | -0.65951700 | -1.06872100 |
| C  | 4.91044600  | -0.65798500 | 0.17771700  |
| H  | 4.35742800  | -1.19360800 | 0.95325200  |
| H  | 5.89375500  | -1.11435300 | 0.04057800  |
| C  | 5.09856000  | 0.79511700  | 0.63430900  |
| Cl | 3.50553600  | 1.58606300  | 0.91645100  |
| Cl | 6.02109400  | 0.73981800  | 2.18063400  |
| Cl | 6.02086500  | 1.72602100  | -0.58861300 |
| O  | -1.88556700 | 1.39516500  | 0.35765200  |
| C  | -2.77365900 | 2.51503200  | 0.44929400  |
| H  | -2.23064700 | 3.44900200  | 0.27594100  |
| H  | -3.25581700 | 2.53522900  | 1.43068700  |
| C  | -3.85573200 | 2.38072200  | -0.62666700 |
| Cl | -4.80274800 | 0.87462500  | -0.40253500 |
| Cl | -3.11357500 | 2.38739600  | -2.26997300 |
| Cl | -4.93772700 | 3.80919800  | -0.45619500 |

22

0 imaginary frequency

H = -7139.609048

G = -7139.708909

Esol = -7139.981321

|    |             |             |             |
|----|-------------|-------------|-------------|
| Se | -0.42029900 | -1.25182900 | -0.76949300 |
| N  | -0.56629300 | 0.28313700  | 0.29998400  |

|   |             |             |             |
|---|-------------|-------------|-------------|
| N | -0.07150800 | -2.27739500 | 0.67760100  |
| S | -0.65925800 | 1.76353900  | -0.51514600 |
| O | -1.41200900 | 2.64486700  | 0.36444900  |
| O | -0.99487900 | 1.53670100  | -1.90977700 |
| S | 0.41874400  | -3.73473500 | 0.14684500  |
| O | -0.20454700 | -4.07242700 | -1.14450000 |
| O | 0.40714700  | -4.66093200 | 1.27005100  |
| C | -6.21321600 | -0.05366100 | 1.58785700  |
| C | -4.78055300 | -0.46282500 | 1.83846200  |
| C | -3.95394000 | -0.48814700 | 0.56910700  |
| C | -4.19582800 | 0.74882500  | -0.26254900 |
| C | -5.68848500 | 0.93084700  | -0.58495900 |
| C | -6.65933800 | 0.55970800  | 0.47697700  |
| H | -4.33285300 | 0.25562600  | 2.54834500  |
| H | -6.91949800 | -0.29432400 | 2.38182800  |
| H | -4.76560600 | -1.42394900 | 2.35845400  |
| C | -8.10112800 | 0.91038600  | 0.22913800  |
| H | -8.46474900 | 0.42383200  | -0.68275700 |
| H | -8.73430600 | 0.60530500  | 1.06743100  |
| H | -8.21932900 | 1.98833100  | 0.07060500  |
| O | -6.04176900 | 1.41097800  | -1.64834300 |
| C | -3.19171900 | -1.55520800 | 0.21433000  |
| C | -3.12663400 | -2.83161900 | 1.03965000  |
| C | -2.40360800 | -1.57549100 | -1.05452000 |
| H | -4.11852400 | -3.13403400 | 1.39003400  |
| H | -2.46865500 | -2.73522800 | 1.90893300  |
| H | -3.65455200 | 0.78951100  | -1.20790100 |
| H | -3.89713900 | 1.64333300  | 0.30665800  |
| H | -2.72957900 | -3.65564000 | 0.44237300  |
| O | 2.02118700  | -3.53798400 | -0.31619100 |

|    |             |             |             |
|----|-------------|-------------|-------------|
| C  | 2.91219600  | -3.12460100 | 0.70977800  |
| H  | 3.53475000  | -3.96715300 | 1.02455900  |
| H  | 2.37863800  | -2.71948400 | 1.57431300  |
| C  | 3.83224600  | -2.02335900 | 0.16306600  |
| Cl | 2.86280100  | -0.58302600 | -0.33830200 |
| Cl | 4.77519200  | -2.61470500 | -1.23860200 |
| Cl | 4.95221700  | -1.54807100 | 1.49404300  |
| O  | 0.90339800  | 2.20520000  | -0.55443700 |
| C  | 1.50500600  | 2.73219900  | 0.64486800  |
| H  | 0.74082600  | 2.99802400  | 1.37714300  |
| H  | 2.18303900  | 1.97708200  | 1.04666800  |
| C  | 2.30315400  | 3.99460100  | 0.29002700  |
| Cl | 3.06337200  | 4.54821700  | 1.83053200  |
| Cl | 1.21740200  | 5.26922900  | -0.34566000 |
| Cl | 3.57624600  | 3.61810800  | -0.91256000 |
| H  | -1.35444700 | 0.17900700  | 0.94931200  |
| H  | -2.37362300 | -2.55935500 | -1.52860200 |
| H  | -2.66145700 | -0.81670000 | -1.79297900 |

23

0 imaginary frequency

H = -7139.581148

G = -7139.682616

Esol = -7139.952529

|    |             |             |             |
|----|-------------|-------------|-------------|
| Se | -0.34173200 | -1.51671800 | -1.39880200 |
| N  | -0.31123500 | -0.15890500 | -0.30973100 |
| N  | -0.10183100 | -2.98492900 | -0.52479900 |
| S  | -0.47122400 | 1.28889000  | -1.14117000 |
| O  | -1.45793900 | 2.09459500  | -0.43546100 |

|   |             |             |             |
|---|-------------|-------------|-------------|
| O | -0.56735600 | 1.06123800  | -2.58231100 |
| S | 0.14825200  | -3.06613600 | 1.12205300  |
| O | 0.44382300  | -4.46168800 | 1.40542000  |
| O | -0.84686800 | -2.32759600 | 1.88160000  |
| C | -4.28398000 | 0.69104300  | 1.91210900  |
| C | -3.62234200 | -0.48340700 | 1.24520600  |
| C | -3.97572200 | -0.55050100 | -0.25309400 |
| C | -5.51121300 | -0.44521000 | -0.41981800 |
| C | -6.08219300 | 0.80501700  | 0.25287200  |
| C | -5.39401200 | 1.31178300  | 1.46639700  |
| H | -2.53802500 | -0.42561800 | 1.37737500  |
| H | -3.81389700 | 1.04963600  | 2.82738800  |
| H | -3.93391000 | -1.40664000 | 1.75747900  |
| C | -6.01493700 | 2.50354700  | 2.14412900  |
| H | -6.04538000 | 3.36371000  | 1.46581500  |
| H | -7.05365700 | 2.29627300  | 2.42533700  |
| H | -5.45457900 | 2.78509300  | 3.04060400  |
| O | -7.09713900 | 1.32974900  | -0.18071800 |
| C | -3.46306800 | -1.77636300 | -0.97644300 |
| C | -3.58339000 | -3.12098500 | -0.32282900 |
| C | -2.91959200 | -1.65884000 | -2.21998200 |
| H | -3.33769700 | -3.93238900 | -1.01218400 |
| H | -4.59647800 | -3.28526600 | 0.06404300  |
| H | -6.00037600 | -1.31714700 | 0.04005300  |
| H | -5.81008500 | -0.42618400 | -1.47194000 |
| H | -2.90659700 | -3.18513200 | 0.53922300  |
| O | 1.54120900  | -2.19155400 | 1.32321900  |
| C | 2.77431400  | -2.86542100 | 1.05354000  |
| H | 2.63060300  | -3.73003700 | 0.40213900  |
| H | 3.22052000  | -3.19258700 | 1.99635200  |

|    |             |             |             |
|----|-------------|-------------|-------------|
| C  | 3.74139800  | -1.88935900 | 0.37162300  |
| Cl | 4.04335200  | -0.46169800 | 1.41508000  |
| Cl | 3.08533200  | -1.34531400 | -1.21783000 |
| Cl | 5.28259000  | -2.77895200 | 0.10575900  |
| O  | 1.01080300  | 1.94736600  | -0.93173600 |
| C  | 1.33518100  | 2.48292600  | 0.36107500  |
| H  | 0.42777800  | 2.72536800  | 0.91789300  |
| H  | 1.93856200  | 1.75245900  | 0.90463900  |
| C  | 2.14999900  | 3.76936400  | 0.17247100  |
| Cl | 3.65628200  | 3.43596600  | -0.74360800 |
| Cl | 2.56742700  | 4.34714600  | 1.83207900  |
| Cl | 1.18302900  | 5.01369000  | -0.67778200 |
| H  | -3.54019300 | 0.33638600  | -0.72981600 |
| H  | -2.67449000 | -2.54079900 | -2.80714200 |
| H  | -2.85535200 | -0.69861200 | -2.72690000 |

24

0 imaginary frequency

H = -7139.609078

G = -7139.707903

Esol = -7139.981392

|    |             |             |             |
|----|-------------|-------------|-------------|
| Se | 0.46700200  | -0.19375200 | -0.44096400 |
| N  | -0.27198700 | -0.53005000 | 1.16265800  |
| N  | 1.49149100  | -1.77778900 | -0.40690700 |
| S  | -0.57372800 | 0.85396700  | 1.95097200  |
| O  | 0.54020300  | 1.81165800  | 2.00059600  |
| O  | -1.31771600 | 0.54662300  | 3.16116900  |
| S  | 2.57253400  | -1.96782300 | -1.69478200 |
| O  | 2.05924600  | -1.34666900 | -2.90521300 |

|   |             |             |             |
|---|-------------|-------------|-------------|
| O | 3.00974100  | -3.35195400 | -1.64327000 |
| C | -4.02772300 | -3.02936500 | 1.71433000  |
| C | -2.76762700 | -3.09990200 | 0.89346800  |
| C | -2.76057800 | -2.04963700 | -0.22782000 |
| C | -4.09675500 | -2.10475000 | -0.99829600 |
| C | -5.30553400 | -1.94662400 | -0.07751700 |
| C | -5.19020500 | -2.48649600 | 1.30294800  |
| H | -3.97197100 | -3.45274700 | 2.71693100  |
| H | -1.89666300 | -2.94698200 | 1.54124900  |
| H | -2.69994600 | -1.07289500 | 0.26266500  |
| H | -4.16495900 | -1.33506900 | -1.77410100 |
| H | -2.67173800 | -4.11716000 | 0.48138300  |
| H | -4.18551400 | -3.07706300 | -1.50633200 |
| C | -6.42190000 | -2.40084800 | 2.16353800  |
| H | -6.24656700 | -2.83729000 | 3.15129500  |
| H | -6.73323700 | -1.35801700 | 2.29133600  |
| H | -7.26539800 | -2.91759600 | 1.69171000  |
| O | -6.33899400 | -1.43388600 | -0.48175200 |
| C | -1.58507800 | -2.14886400 | -1.19145600 |
| C | -1.10562300 | -3.30640800 | -1.67991700 |
| H | -1.70233900 | -0.01829200 | -1.63936400 |
| H | -1.51121800 | -4.26875000 | -1.38260400 |
| H | -0.32804500 | -3.32992500 | -2.43982100 |
| C | -0.99815200 | -0.85376000 | -1.65996400 |
| H | -0.49665300 | -0.90825600 | -2.62821900 |
| H | 0.87051500  | -2.59462800 | -0.33029300 |
| O | 3.74981100  | -0.96313200 | -1.21179200 |
| C | 4.50748400  | -1.32681900 | -0.03833100 |
| H | 3.95218100  | -2.03017500 | 0.58496400  |
| H | 5.45352200  | -1.76693800 | -0.35839300 |



|    |             |             |             |
|----|-------------|-------------|-------------|
| C  | 4.78429400  | -0.05808900 | 0.77771900  |
| Cl | 3.25854800  | 0.67662700  | 1.35419500  |
| Cl | 5.78410100  | -0.58294200 | 2.18532000  |
| Cl | 5.70526500  | 1.12706200  | -0.20731600 |
| O  | -1.66234800 | 1.52739700  | 0.80816900  |
| C  | -1.85211600 | 2.93413000  | 0.83907900  |
| H  | -1.02520300 | 3.43138000  | 1.35374200  |
| H  | -2.80300400 | 3.17948700  | 1.32239500  |
| C  | -1.89940000 | 3.45845800  | -0.60421700 |
| Cl | -3.25967900 | 2.70077500  | -1.50877400 |
| Cl | -0.34922500 | 3.08821900  | -1.45406400 |
| Cl | -2.13755700 | 5.23605800  | -0.53640400 |

25

0 imaginary frequency

H = -4860.817552

G = -4860.912087

Esol = -4861.203040

|    |             |             |             |
|----|-------------|-------------|-------------|
| Se | 1.67625400  | 0.05690000  | -1.41022000 |
| N  | 1.56713000  | 1.66846400  | -1.98977000 |
| N  | 0.78589900  | -0.08010100 | 0.10036300  |
| S  | 1.32322900  | 3.02786200  | -1.03962200 |
| O  | 1.31472700  | 4.14951500  | -1.97677900 |
| O  | 2.22935100  | 3.05156300  | 0.11857400  |
| S  | 0.59108100  | -1.66312400 | 0.58364100  |
| O  | 0.77005500  | -1.71260100 | 2.03892900  |
| O  | 1.39400500  | -2.56998900 | -0.27498200 |
| C  | -1.14127200 | -2.00825300 | 0.23044100  |
| C  | -1.45287100 | -3.07951000 | -0.60789300 |

|   |             |             |             |
|---|-------------|-------------|-------------|
| C | -2.13759200 | -1.22087100 | 0.81613900  |
| C | -2.78993500 | -3.37308200 | -0.86806200 |
| H | -0.65599800 | -3.67172900 | -1.04285700 |
| C | -3.47463000 | -1.50328700 | 0.54980700  |
| H | -1.87011300 | -0.39481700 | 1.46571800  |
| C | -3.77426600 | -2.57965500 | -0.28550400 |
| H | -3.07654100 | -4.19807200 | -1.50822900 |
| H | -4.27679600 | -0.90416300 | 0.96371600  |
| N | -5.19032000 | -2.89360000 | -0.56347800 |
| O | -6.04367800 | -2.21202500 | -0.00180900 |
| O | -5.42359900 | -3.81992500 | -1.33880600 |
| C | -0.34869800 | 2.84481900  | -0.38609900 |
| C | -0.60310900 | 3.29893700  | 0.90817400  |
| C | -1.35952400 | 2.30592500  | -1.18441800 |
| C | -1.89432100 | 3.21025600  | 1.42141600  |
| H | 0.20689800  | 3.69935300  | 1.50713400  |
| C | -2.64795400 | 2.19673900  | -0.67126200 |
| H | -1.13676800 | 1.96325000  | -2.18932100 |
| C | -2.89101900 | 2.64890700  | 0.62593700  |
| H | -2.13403900 | 3.55127000  | 2.42100300  |
| H | -3.45683400 | 1.76892400  | -1.25035400 |
| N | -4.24453300 | 2.50269500  | 1.18736500  |
| O | -4.48210900 | 3.05644600  | 2.25867800  |
| O | -5.05263500 | 1.82188200  | 0.55349300  |
| C | 4.00462700  | -0.67292100 | 0.35168300  |
| C | 4.33391200  | -1.52671700 | 2.39262300  |
| C | 4.68658800  | -2.47849700 | 1.49014500  |
| H | 4.33657900  | -1.54506100 | 3.47064600  |
| H | 5.05440800  | -3.48205700 | 1.63328800  |
| N | 3.91211600  | -0.41365900 | 1.68562800  |

|   |            |             |             |
|---|------------|-------------|-------------|
| N | 4.48694100 | -1.94448200 | 0.22880700  |
| C | 3.39907800 | 0.82873200  | 2.25968000  |
| H | 4.14612700 | 1.25256100  | 2.93645300  |
| H | 3.19101800 | 1.52903200  | 1.45084700  |
| H | 2.47402900 | 0.61601300  | 2.79984800  |
| C | 4.59392000 | -2.64121400 | -1.04502900 |
| H | 3.76492900 | -3.34562000 | -1.14964700 |
| H | 4.53952800 | -1.89537900 | -1.83865900 |
| H | 5.55095900 | -3.16533900 | -1.10246100 |
| O | 3.72923000 | 0.11942900  | -0.60892600 |

26

0 imaginary frequency

H = -5066.617609

G = -5066.725718

Esol = -5067.236417

|    |             |             |             |
|----|-------------|-------------|-------------|
| Se | 0.40704600  | -1.07630300 | -0.20590000 |
| N  | -0.19961800 | -2.48962500 | -0.96826100 |
| N  | -0.72722400 | -0.53447700 | 1.01904900  |
| S  | -1.31438200 | -3.56755000 | -0.27843600 |
| O  | -1.02004200 | -3.73738400 | 1.14902300  |
| O  | -1.32479300 | -4.71092800 | -1.18782700 |
| S  | -0.26008000 | 0.94464700  | 1.65953700  |
| O  | 1.00798100  | 1.38142100  | 1.02939900  |
| O  | -0.34813500 | 0.88795100  | 3.11940900  |
| C  | -1.56899400 | 2.02759800  | 1.06025700  |
| C  | -1.85753400 | 2.06476900  | -0.30674800 |
| C  | -2.21603600 | 2.86176100  | 1.97126700  |
| C  | -2.80598000 | 2.96494400  | -0.77766100 |

|   |             |             |             |
|---|-------------|-------------|-------------|
| H | -1.35875800 | 1.38487400  | -0.98899600 |
| C | -3.16946100 | 3.76517500  | 1.50321100  |
| H | -1.97497700 | 2.79857500  | 3.02649700  |
| C | -3.44239600 | 3.80201600  | 0.13887000  |
| H | -3.06083200 | 3.02777400  | -1.82813700 |
| H | -3.69664000 | 4.43258000  | 2.17351400  |
| N | -4.44637100 | 4.76397300  | -0.35992100 |
| O | -4.66632700 | 4.77576900  | -1.56911400 |
| O | -4.99289400 | 5.49165300  | 0.46551600  |
| C | -2.90841400 | -2.74790700 | -0.43621100 |
| C | -3.56567300 | -2.79909600 | -1.66908800 |
| C | -3.47215800 | -2.11963000 | 0.67548500  |
| C | -4.80993900 | -2.18979300 | -1.80018600 |
| H | -3.11503300 | -3.32425000 | -2.50408300 |
| C | -4.72057600 | -1.51456900 | 0.54820400  |
| H | -2.93658300 | -2.10535500 | 1.61672900  |
| C | -5.36217900 | -1.55647200 | -0.68756500 |
| H | -5.35602100 | -2.20511300 | -2.73507400 |
| H | -5.19875600 | -1.01950600 | 1.38409500  |
| N | -6.68253900 | -0.90917700 | -0.82353700 |
| O | -7.14540300 | -0.34894700 | 0.16816900  |
| O | -7.23378700 | -0.96860400 | -1.92079300 |
| C | 4.17682600  | -1.20538200 | 0.77418200  |
| C | 4.02905400  | 0.14027200  | 0.01803400  |
| C | 5.16538500  | 0.44129200  | -1.00422500 |
| C | 6.51999800  | 0.23721200  | -0.31011100 |
| C | 6.67946900  | -1.03603800 | 0.49691800  |
| C | 5.53552300  | -1.23933400 | 1.50410000  |
| H | 3.06394200  | 0.15401300  | -0.49823500 |
| C | 5.01832300  | 1.93356300  | -1.45914600 |

|   |            |             |             |
|---|------------|-------------|-------------|
| C | 7.52377200 | 1.12112200  | -0.39159800 |
| H | 6.70817800 | -1.90891500 | -0.17316300 |
| H | 5.57101300 | -0.44134500 | 2.25689800  |
| C | 7.49223300 | 2.39694700  | -1.18788800 |
| C | 6.29801500 | 2.43852500  | -2.14608600 |
| H | 8.44565000 | 0.91257300  | 0.15295200  |
| H | 7.45381900 | 3.25621200  | -0.49900300 |
| H | 6.51213300 | 1.82584500  | -3.03199200 |
| H | 5.66107700 | -2.19254000 | 2.03320200  |
| H | 8.43446200 | 2.51103800  | -1.74187800 |
| H | 6.14119700 | 3.46145800  | -2.51076000 |
| H | 4.90594300 | 2.52032300  | -0.53448600 |
| H | 3.99477200 | 0.95365100  | 0.75269100  |
| C | 3.78224700 | 2.21671200  | -2.32710600 |
| H | 3.69496300 | 3.29470000  | -2.50568100 |
| H | 3.85024500 | 1.73016100  | -3.30693800 |
| H | 2.85193800 | 1.89266900  | -1.84867100 |
| C | 5.05377200 | -0.52704300 | -2.20918400 |
| H | 4.17594300 | -2.01628900 | 0.03369900  |
| C | 3.00140700 | -1.44768000 | 1.69824500  |
| C | 2.87393200 | -0.62628000 | 2.94874400  |
| H | 1.89731000 | -0.75108300 | 3.42211400  |
| H | 3.64281200 | -0.93694600 | 3.66995700  |
| C | 2.07804800 | -2.40597400 | 1.39742100  |
| H | 2.24551600 | -3.09488800 | 0.57340700  |
| H | 5.76510300 | -0.26125400 | -2.99744000 |
| H | 5.26840600 | -1.56116500 | -1.92306300 |
| H | 4.04706600 | -0.51114100 | -2.64171300 |
| H | 7.64117600 | -1.02287500 | 1.02239900  |
| H | 1.25452900 | -2.64541000 | 2.06502800  |

|   |            |            |            |
|---|------------|------------|------------|
| H | 3.02772600 | 0.43980600 | 2.75474900 |
|---|------------|------------|------------|

27

0 imaginary frequency

H = -5066.647000

G = -5066.752933

Esol = -5067.266645

|    |             |             |             |
|----|-------------|-------------|-------------|
| Se | 0.49269500  | -0.64262500 | 0.31328000  |
| N  | -1.08910200 | -1.33299900 | -0.10557000 |
| N  | 0.21398300  | 0.57567300  | 1.72613000  |
| S  | -1.94958800 | -1.95651900 | 1.17074500  |
| O  | -2.12944700 | -0.92210000 | 2.22435300  |
| O  | -1.46013700 | -3.27315200 | 1.61552100  |
| S  | 0.73034800  | 2.15186500  | 1.49973600  |
| O  | 1.79810900  | 2.04112100  | 0.50030100  |
| O  | 0.96316600  | 2.74344400  | 2.81375600  |
| C  | -0.65905700 | 3.03662900  | 0.75964000  |
| C  | -1.45589700 | 2.42376200  | -0.21175400 |
| C  | -0.86816000 | 4.36142700  | 1.14918100  |
| C  | -2.47759600 | 3.15375900  | -0.81156700 |
| H  | -1.30632500 | 1.38560500  | -0.48765200 |
| C  | -1.88890700 | 5.09500200  | 0.54860000  |
| H  | -0.24674800 | 4.80362100  | 1.91977600  |
| C  | -2.67294900 | 4.47737700  | -0.42209600 |
| H  | -3.11847900 | 2.71577100  | -1.56656000 |
| H  | -2.08524100 | 6.12400400  | 0.82284900  |
| N  | -3.75864100 | 5.25071100  | -1.05807400 |
| O  | -4.44646800 | 4.67484500  | -1.89845300 |
| O  | -3.90380600 | 6.41892500  | -0.70585100 |

|   |             |             |             |
|---|-------------|-------------|-------------|
| C | -3.53640100 | -2.19888100 | 0.36382100  |
| C | -3.86200800 | -3.46953600 | -0.11169100 |
| C | -4.42147400 | -1.12374600 | 0.25798300  |
| C | -5.09593000 | -3.66833500 | -0.72702900 |
| H | -3.15995500 | -4.28691600 | 0.00858700  |
| C | -5.65594100 | -1.31809700 | -0.35446900 |
| H | -4.14939300 | -0.15476700 | 0.66138000  |
| C | -5.96744200 | -2.58771900 | -0.83879100 |
| H | -5.39047700 | -4.63672000 | -1.11164100 |
| H | -6.37423300 | -0.51434600 | -0.45750600 |
| N | -7.27640600 | -2.79638400 | -1.48974600 |
| O | -8.02975100 | -1.82852100 | -1.57287000 |
| O | -7.52909200 | -3.92431700 | -1.90830900 |
| C | 4.00890800  | -1.60803900 | 1.04114200  |
| C | 3.83815300  | -0.83788700 | -0.29075700 |
| C | 5.00201900  | -0.98567200 | -1.31589900 |
| C | 6.33937300  | -0.76570700 | -0.59820500 |
| C | 6.51270100  | -1.47812800 | 0.72693700  |
| C | 5.34274700  | -1.21399900 | 1.68883500  |
| H | 2.92151200  | -1.16613200 | -0.79385300 |
| C | 4.80679100  | 0.10763300  | -2.42063700 |
| C | 7.31395500  | 0.00836500  | -1.09429000 |
| H | 6.59037900  | -2.56465200 | 0.56577700  |
| H | 5.32409700  | -0.14592300 | 1.94439000  |
| C | 7.25736000  | 0.73845000  | -2.40881700 |
| C | 6.07726800  | 0.27553800  | -3.27016400 |
| H | 8.22820600  | 0.13054000  | -0.51193700 |
| H | 7.18311700  | 1.82145800  | -2.21947300 |
| H | 6.32616700  | -0.67393500 | -3.76270500 |
| H | 5.49309000  | -1.76940300 | 2.62288200  |

|   |             |             |             |
|---|-------------|-------------|-------------|
| H | 8.20462700  | 0.60266100  | -2.94942200 |
| H | 5.89112800  | 0.99850800  | -4.07439800 |
| H | 4.66351600  | 1.05531500  | -1.87968100 |
| H | 3.70207600  | 0.22405500  | -0.04905700 |
| C | 3.56891600  | -0.09346600 | -3.30924800 |
| H | 3.45501000  | 0.76276600  | -3.98414100 |
| H | 3.65065000  | -0.99045500 | -3.93393900 |
| H | 2.64392700  | -0.16790400 | -2.72641800 |
| C | 4.97703100  | -2.41371800 | -1.91808700 |
| H | 4.06161100  | -2.68415700 | 0.80660400  |
| C | 2.79807300  | -1.43153500 | 1.95285000  |
| C | 2.84269900  | -0.84548100 | 3.15842600  |
| H | 1.95425700  | -0.75024500 | 3.77493100  |
| H | 3.75901500  | -0.43937300 | 3.57162800  |
| C | 1.49070500  | -1.98413000 | 1.47191100  |
| H | 1.59158700  | -2.81998500 | 0.77380300  |
| H | 5.72503500  | -2.52461100 | -2.70932100 |
| H | 5.19622100  | -3.17510300 | -1.16290200 |
| H | 3.99516000  | -2.65022900 | -2.34385600 |
| H | 7.45642000  | -1.17053300 | 1.19165100  |
| H | 0.79424900  | -2.25397400 | 2.26510500  |
| H | -0.64306400 | 0.39462400  | 2.26419100  |

28

0 imaginary frequency

H = -5446.733621

G = -5446.860412

Esol = -5447.496453

|    |            |            |             |
|----|------------|------------|-------------|
| Se | 0.05109600 | 0.31997000 | -1.32075900 |
|----|------------|------------|-------------|



|   |             |             |             |
|---|-------------|-------------|-------------|
| N | 0.44444400  | 1.79347700  | -0.53876500 |
| N | -0.46318800 | -0.80097400 | -0.08176500 |
| S | 0.97606300  | 1.88830900  | 1.04349200  |
| O | 1.67682700  | 0.66468900  | 1.47494700  |
| O | -0.07235800 | 2.44229100  | 1.90562300  |
| S | -0.82173500 | -2.33012400 | -0.62068200 |
| O | -0.32671300 | -2.55338800 | -2.00204300 |
| O | -2.22944800 | -2.63960700 | -0.34591100 |
| C | 0.18333200  | -3.34169900 | 0.48270200  |
| C | 0.64070000  | -2.84377300 | 1.70558000  |
| C | 0.42705500  | -4.66077700 | 0.08724100  |
| C | 1.35823200  | -3.68856200 | 2.55171100  |
| H | 0.46244100  | -1.80861400 | 1.97526800  |
| C | 1.14089100  | -5.50494900 | 0.93164900  |
| H | 0.06906500  | -5.01716500 | -0.87272400 |
| C | 1.59421000  | -5.00205000 | 2.15065300  |
| H | 1.73187300  | -3.34314000 | 3.50780300  |
| H | 1.35070400  | -6.53309100 | 0.66429600  |
| N | 2.36408700  | -5.89131800 | 3.04080200  |
| O | 2.56918300  | -7.04196100 | 2.65639200  |
| O | 2.75908700  | -5.42597700 | 4.10807600  |
| C | 2.23007500  | 3.16420600  | 0.81481400  |
| C | 2.14499300  | 4.32734900  | 1.57796300  |
| C | 3.28533400  | 2.93828500  | -0.07409900 |
| C | 3.14130500  | 5.29504700  | 1.45462600  |
| H | 1.30701100  | 4.46820600  | 2.25145600  |
| C | 4.27913800  | 3.90258100  | -0.20082400 |
| H | 3.31585700  | 2.02857700  | -0.66567200 |
| C | 4.18935600  | 5.06368700  | 0.56814100  |
| H | 3.11513500  | 6.21391700  | 2.02694900  |

|   |             |             |             |
|---|-------------|-------------|-------------|
| H | 5.11287800  | 3.77500500  | -0.87985500 |
| N | 5.24437700  | 6.08559400  | 0.43334500  |
| O | 5.14390200  | 7.10264000  | 1.11711100  |
| O | 6.16095500  | 5.85691600  | -0.35487700 |
| C | 2.79021700  | -1.34455000 | -1.84143100 |
| C | 3.87694100  | -3.28040000 | -1.47314700 |
| C | 3.33487500  | -3.34680500 | -2.71447000 |
| H | 4.47212400  | -3.99449300 | -0.92622500 |
| H | 3.35702900  | -4.13521800 | -3.45015000 |
| N | 3.53247600  | -2.04861200 | -0.93062100 |
| N | 2.67644900  | -2.14726500 | -2.94593700 |
| C | 3.95127800  | -1.52219100 | 0.36314300  |
| H | 3.27636800  | -0.71516900 | 0.65143000  |
| H | 3.89599200  | -2.31937600 | 1.10794600  |
| H | 4.97841100  | -1.14564200 | 0.31050100  |
| C | 1.87570700  | -1.80280100 | -4.11029500 |
| H | 1.59628600  | -0.75272500 | -4.01950700 |
| H | 2.46164900  | -1.94555600 | -5.02237100 |
| H | 0.96944700  | -2.41180100 | -4.13547200 |
| O | 2.34605600  | -0.17070500 | -1.71070400 |
| C | -3.78731200 | 0.42755700  | -1.62489200 |
| C | -3.71917400 | 1.29867800  | -0.35623900 |
| C | -4.73192700 | 0.91850000  | 0.77006700  |
| C | -6.13020300 | 0.80038500  | 0.14524500  |
| C | -6.23002700 | -0.01997800 | -1.12341000 |
| C | -5.22614000 | 0.43985400  | -2.19173500 |
| H | -2.69507700 | 1.25973200  | 0.03285000  |
| C | -4.72349400 | 2.06068400  | 1.84364500  |
| C | -7.22133700 | 1.38596900  | 0.65790100  |
| H | -6.03646700 | -1.08073900 | -0.90372400 |

|   |             |             |             |
|---|-------------|-------------|-------------|
| H | -5.47201200 | 1.46067500  | -2.51567500 |
| C | -7.25321700 | 2.19463200  | 1.92559100  |
| C | -5.97170200 | 2.00407700  | 2.74019400  |
| H | -8.16965000 | 1.27028200  | 0.13067500  |
| H | -7.39078200 | 3.26061500  | 1.68028900  |
| H | -6.00748000 | 1.03842000  | 3.26248400  |
| H | -5.30509900 | -0.20599900 | -3.07466000 |
| H | -8.13465500 | 1.91739100  | 2.52136700  |
| H | -5.89877200 | 2.77316700  | 3.51996600  |
| H | -4.78474200 | 3.00560600  | 1.28051500  |
| H | -3.91555200 | 2.34217800  | -0.63802800 |
| C | -3.45032600 | 2.11875200  | 2.70039600  |
| H | -3.39176700 | 1.27019900  | 3.39209900  |
| H | -2.53233600 | 2.12957500  | 2.10735700  |
| H | -3.45539000 | 3.03102700  | 3.30936200  |
| C | -4.33115600 | -0.43841400 | 1.40098700  |
| C | -2.78549900 | 0.81979400  | -2.70141000 |
| C | -2.51499500 | -0.21462500 | -3.76972200 |
| H | -3.43622300 | -0.50167700 | -4.29078900 |
| H | -1.80957000 | 0.15824700  | -4.51978700 |
| H | -2.10461500 | -1.13602200 | -3.33664300 |
| C | -2.15059400 | 2.00675200  | -2.73483200 |
| H | -1.46884300 | 2.25487000  | -3.54583700 |
| H | -2.29312500 | 2.77278500  | -1.98123500 |
| H | -4.97128600 | -0.67715100 | 2.25722900  |
| H | -4.41365800 | -1.26497400 | 0.69099000  |
| H | -3.29137700 | -0.41970300 | 1.74194600  |
| H | -7.25102700 | 0.03237300  | -1.52003900 |
| H | -3.55890600 | -0.61131500 | -1.34632200 |

29

0 imaginary frequency

H = -5066.659507

G = -5066.766460

Esol = -5067.279034

|    |             |             |             |
|----|-------------|-------------|-------------|
| Se | -0.32448000 | -1.60394000 | 1.99392800  |
| N  | 0.49399500  | -0.06233300 | 2.30206000  |
| N  | -0.56729500 | -1.51843700 | 0.09703800  |
| S  | -0.57600300 | 1.12895600  | 2.76782000  |
| O  | -0.20673200 | 1.64336300  | 4.08995100  |
| O  | -1.97367400 | 0.68940200  | 2.53311300  |
| S  | -1.68456900 | -2.62491600 | -0.55611100 |
| O  | -2.05632900 | -3.55508900 | 0.51968400  |
| O  | -1.13146600 | -3.10561000 | -1.82449200 |
| C  | -3.11216400 | -1.59095800 | -0.89897300 |
| C  | -3.59753400 | -0.73657100 | 0.09551800  |
| C  | -3.74025100 | -1.72765800 | -2.13716700 |
| C  | -4.74778900 | 0.00346000  | -0.16202400 |
| H  | -3.07973600 | -0.61774600 | 1.04132500  |
| C  | -4.89508100 | -0.99007500 | -2.39105400 |
| H  | -3.32756300 | -2.39335800 | -2.88694600 |
| C  | -5.37649700 | -0.14098300 | -1.39813700 |
| H  | -5.15294200 | 0.68454200  | 0.57582500  |
| H  | -5.41808900 | -1.06158000 | -3.33644500 |
| N  | -6.59934900 | 0.64288000  | -1.66959400 |
| O  | -7.13254600 | 0.49867400  | -2.76786600 |
| O  | -7.00392100 | 1.38762900  | -0.78022000 |
| C  | -0.22682300 | 2.45231700  | 1.58990200  |
| C  | 0.48536400  | 3.57053400  | 2.02456100  |

|   |             |             |             |
|---|-------------|-------------|-------------|
| C | -0.69809100 | 2.35027100  | 0.27795300  |
| C | 0.74613800  | 4.60535000  | 1.12779100  |
| H | 0.81939000  | 3.62440600  | 3.05448100  |
| C | -0.44066300 | 3.37978300  | -0.62145900 |
| H | -1.26149600 | 1.47782200  | -0.03438900 |
| C | 0.28097000  | 4.48896800  | -0.17967800 |
| H | 1.29465200  | 5.49039700  | 1.42520900  |
| H | -0.78836600 | 3.34154900  | -1.64625100 |
| N | 0.55961700  | 5.57900300  | -1.13348200 |
| O | 0.14687000  | 5.44690300  | -2.28476600 |
| O | 1.19016300  | 6.55039600  | -0.72014300 |
| C | 2.88591300  | -2.70787800 | 0.08606600  |
| C | 3.53117600  | -1.37488400 | 0.40279400  |
| C | 3.69469800  | -0.40498100 | -0.81887100 |
| C | 4.35062200  | -1.17836700 | -1.96735200 |
| C | 3.71943400  | -2.51061400 | -2.30702100 |
| C | 3.55765000  | -3.41771500 | -1.06830600 |
| H | 2.99528600  | -0.84195500 | 1.18973500  |
| C | 4.60360900  | 0.78575500  | -0.36366400 |
| C | 5.42090200  | -0.73285200 | -2.63904200 |
| H | 2.72708400  | -2.36195300 | -2.75652300 |
| H | 4.56321600  | -3.70884800 | -0.72566500 |
| C | 6.08656000  | 0.59636300  | -2.41033400 |
| C | 5.20693500  | 1.52507000  | -1.56921200 |
| H | 5.84408400  | -1.36324900 | -3.42202300 |
| H | 7.05862200  | 0.44228700  | -1.91462400 |
| H | 4.40102400  | 1.93359100  | -2.19403300 |
| H | 3.04442700  | -4.34093300 | -1.34488200 |
| H | 6.32319300  | 1.06234500  | -3.37674800 |
| H | 5.78966600  | 2.38562500  | -1.21766400 |

|   |            |             |             |
|---|------------|-------------|-------------|
| H | 5.44641100 | 0.33309800  | 0.18173500  |
| H | 4.54218900 | -1.58537700 | 0.78501200  |
| C | 3.91788400 | 1.77826600  | 0.58921500  |
| H | 3.42030200 | 1.28829100  | 1.43249300  |
| H | 4.66154200 | 2.47014000  | 1.00117700  |
| H | 3.16654000 | 2.38240300  | 0.06829900  |
| C | 2.30094400 | 0.09752500  | -1.26603100 |
| C | 1.89309200 | -3.27637300 | 0.81858000  |
| C | 1.27821900 | -4.63034900 | 0.50856600  |
| H | 1.22440100 | -4.84076000 | -0.56132100 |
| H | 1.84794300 | -5.44077300 | 0.98447400  |
| H | 0.25533300 | -4.68635800 | 0.89373800  |
| C | 1.41594200 | -2.67976800 | 2.10092800  |
| H | 1.14165500 | -3.44967100 | 2.82680300  |
| H | 2.06729900 | -1.94482800 | 2.56793500  |
| H | 1.72045900 | -0.70082800 | -1.74230600 |
| H | 1.72251000 | 0.47647900  | -0.41774200 |
| H | 2.38864100 | 0.89942500  | -2.00626300 |
| H | 4.32206700 | -3.02935100 | -3.06078900 |
| H | 0.32710600 | -1.59046800 | -0.40005200 |

3

0 imaginary frequency

H = -1740.780646

G = -1740.868922

Esol = -1741.136695

|   |            |            |             |
|---|------------|------------|-------------|
| C | 4.00585700 | 1.67428800 | 1.17964000  |
| O | 3.70215700 | 1.15894500 | -0.03512900 |
| O | 3.32762000 | 1.55010500 | 2.17314100  |

|   |             |             |             |
|---|-------------|-------------|-------------|
| C | 5.31776000  | 2.42678200  | 1.09534400  |
| H | 5.67050600  | 2.64245700  | 2.10483800  |
| H | 6.06376400  | 1.85154500  | 0.54118600  |
| H | 5.14746400  | 3.36402200  | 0.55508700  |
| I | 1.82442900  | 0.34956600  | -0.21266400 |
| O | -0.47000000 | 2.13121600  | -1.06192700 |
| C | 0.41411500  | 3.02377100  | -0.92259100 |
| O | 1.62661200  | 2.79057100  | -0.62270000 |
| C | 0.01242600  | 4.48142500  | -1.10781100 |
| H | -0.44775400 | 4.61162400  | -2.09310000 |
| H | -0.74291200 | 4.74483100  | -0.35901800 |
| H | 0.87159200  | 5.14711100  | -1.00846700 |
| C | 2.71552600  | -1.53346700 | 0.33732500  |
| C | 2.99936400  | -1.78857700 | 1.68026300  |
| C | 2.95307500  | -2.48921500 | -0.65067600 |
| C | 3.54164100  | -3.02577900 | 2.03331300  |
| H | 2.81302500  | -1.03247200 | 2.43582400  |
| C | 3.48838800  | -3.72594400 | -0.28432300 |
| H | 2.71810300  | -2.28388000 | -1.69020600 |
| C | 3.78415900  | -3.99207100 | 1.05406400  |
| H | 3.76932400  | -3.23424800 | 3.07502600  |
| H | 3.67365200  | -4.47804600 | -1.04603200 |
| H | 4.20157400  | -4.95502300 | 1.33496800  |
| N | -1.13886300 | -0.09837500 | -2.59291300 |
| S | -1.49438800 | -1.26591600 | -1.48029800 |
| O | -1.82211300 | -2.49580400 | -2.19838500 |
| O | -0.38436600 | -1.24958500 | -0.50200300 |
| C | -2.97341100 | -0.75948800 | -0.57816100 |
| C | -4.03120000 | -1.66619500 | -0.48305300 |
| C | -3.02331100 | 0.50349700  | 0.02374600  |

|   |             |             |             |
|---|-------------|-------------|-------------|
| C | -5.17132500 | -1.30862100 | 0.23428700  |
| H | -3.95613000 | -2.63354300 | -0.96670900 |
| C | -4.16500300 | 0.86123300  | 0.73628300  |
| H | -2.19747400 | 1.20371600  | -0.07863200 |
| C | -5.21568600 | -0.05112600 | 0.83107900  |
| H | -6.01422400 | -1.98090200 | 0.33456000  |
| H | -4.25164000 | 1.82861800  | 1.21511300  |
| N | -6.42350100 | 0.33197000  | 1.58772000  |
| O | -6.44096100 | 1.44826700  | 2.10245400  |
| O | -7.33598800 | -0.48949000 | 1.65486500  |
| H | -0.88554000 | 0.81317900  | -2.17041000 |
| H | -1.81926000 | -0.05337200 | -3.34660300 |

30

0 imaginary frequency

H = -235.780186

G = -235.820789

Esol = -235.954941

|   |             |             |             |
|---|-------------|-------------|-------------|
| C | -0.23589700 | -0.52887800 | -0.32903000 |
| C | 0.98261200  | -0.04469200 | -0.04278800 |
| H | -0.33023900 | -1.61348100 | -0.42000200 |
| C | 2.16080000  | -0.97430900 | 0.13322200  |
| H | 2.95909800  | -0.74426200 | -0.58687100 |
| H | 2.60566600  | -0.86597400 | 1.13275200  |
| H | 1.87752900  | -2.02329600 | 0.00054300  |
| C | 1.31507600  | 1.41804100  | 0.12750000  |
| H | 1.74732600  | 1.60326000  | 1.12088900  |
| H | 2.07491000  | 1.73084400  | -0.60253100 |
| H | 0.45082900  | 2.07598100  | 0.01153000  |



|   |             |             |             |
|---|-------------|-------------|-------------|
| C | -1.52822800 | 0.21710800  | -0.53051500 |
| H | -1.90937100 | 0.00384500  | -1.54087200 |
| H | -1.37365500 | 1.30049500  | -0.48759100 |
| C | -2.60498000 | -0.18609700 | 0.49277800  |
| H | -2.28845800 | 0.06105200  | 1.51230100  |
| H | -3.55176600 | 0.32964800  | 0.29430500  |
| H | -2.79817500 | -1.26514900 | 0.45854400  |

31

0 imaginary frequency

H = -4716.495607

G = -4716.590919

Esol = -4716.914285

|    |             |             |             |
|----|-------------|-------------|-------------|
| Se | -1.79274900 | -0.37793600 | -1.00402500 |
| N  | -2.04596400 | 1.30193600  | -1.27728400 |
| N  | -0.81603900 | -0.60812400 | 0.43927500  |
| S  | -1.92174100 | 2.52298900  | -0.10641000 |
| O  | -2.50293800 | 2.06835500  | 1.16214600  |
| O  | -2.42730800 | 3.71916100  | -0.77743900 |
| S  | -0.39452500 | -2.23151000 | 0.61303400  |
| O  | -1.07476500 | -3.03274200 | -0.43162000 |
| O  | -0.54191300 | -2.61136400 | 2.01848300  |
| C  | 1.36738400  | -2.19876600 | 0.22982700  |
| C  | 2.23929900  | -2.88144600 | 1.07820500  |
| C  | 1.81703700  | -1.56832500 | -0.93360400 |
| C  | 3.59279900  | -2.94584600 | 0.75073700  |
| H  | 1.85995300  | -3.34833300 | 1.98022900  |
| C  | 3.16574400  | -1.63141900 | -1.26453300 |
| H  | 1.12560900  | -1.01700600 | -1.56130200 |

|   |             |             |             |
|---|-------------|-------------|-------------|
| C | 4.02864000  | -2.32396100 | -0.41575200 |
| H | 4.30498800  | -3.46505200 | 1.37991600  |
| H | 3.55682500  | -1.15621900 | -2.15540600 |
| N | 5.46121300  | -2.39658100 | -0.76846900 |
| O | 5.81741800  | -1.83952100 | -1.80455100 |
| O | 6.20198900  | -3.01180300 | -0.00542000 |
| C | -0.15257200 | 2.75012100  | 0.13195300  |
| C | 0.55110100  | 3.52343900  | -0.79603700 |
| C | 0.46941000  | 2.18993600  | 1.24894300  |
| C | 1.91555300  | 3.72745000  | -0.61344900 |
| H | 0.03127800  | 3.97204300  | -1.63545100 |
| C | 1.83416500  | 2.39771400  | 1.43680400  |
| H | -0.10854400 | 1.60117100  | 1.95047600  |
| C | 2.53118800  | 3.15723400  | 0.49997300  |
| H | 2.50048800  | 4.32052200  | -1.30525000 |
| H | 2.35802200  | 1.98643400  | 2.29055900  |
| N | 3.97893900  | 3.37251800  | 0.69692900  |
| O | 4.50147600  | 2.85404500  | 1.68159000  |
| O | 4.57027900  | 4.05393900  | -0.13811100 |
| C | -4.04793200 | -1.48444800 | 0.31756500  |
| C | -4.62058400 | -0.89066300 | -0.77377500 |
| H | -3.70057900 | -2.51061600 | 0.18478000  |
| C | -4.71392000 | -1.63986600 | -2.07931500 |
| H | -4.22332200 | -2.61631200 | -2.03262300 |
| H | -5.76503500 | -1.79384400 | -2.35675300 |
| H | -4.26457700 | -1.06058700 | -2.89794700 |
| C | -5.20487300 | 0.49136900  | -0.77446700 |
| H | -6.27293500 | 0.44433100  | -1.02634400 |
| H | -5.09495400 | 1.00695500  | 0.17985300  |
| H | -4.72508200 | 1.10857700  | -1.54559000 |

|   |             |             |            |
|---|-------------|-------------|------------|
| C | -3.91069300 | -0.95358600 | 1.71044000 |
| H | -4.09745400 | 0.12128100  | 1.75600000 |
| C | -4.83144900 | -1.70520400 | 2.69323200 |
| H | -4.63250100 | -2.78273400 | 2.68033000 |
| H | -4.66400400 | -1.34556400 | 3.71360200 |
| H | -5.88750600 | -1.55201700 | 2.44583200 |
| H | -2.86966000 | -1.09808500 | 2.03169800 |

32

0 imaginary frequency

H = -4716.520383

G = -4716.613589

Esol = -4716.938967

|    |             |             |             |
|----|-------------|-------------|-------------|
| Se | -1.69711700 | -0.62979100 | -1.19958700 |
| N  | -1.41106100 | 1.07584400  | -1.53607600 |
| N  | -0.82654800 | -0.95538300 | 0.46433500  |
| S  | -1.80553300 | 2.17961500  | -0.36496400 |
| O  | -2.11110800 | 1.49185600  | 0.91931300  |
| O  | -2.77625400 | 3.16887100  | -0.84896100 |
| S  | -0.45606700 | -2.56298500 | 0.80581100  |
| O  | -1.14831100 | -3.38734200 | -0.19681100 |
| O  | -0.64225500 | -2.78071900 | 2.23993800  |
| C  | 1.29991200  | -2.64609800 | 0.43044900  |
| C  | 2.16111800  | -3.20412100 | 1.37337900  |
| C  | 1.75057900  | -2.21174500 | -0.82034300 |
| C  | 3.51348700  | -3.33576200 | 1.05857500  |
| H  | 1.77804700  | -3.52343300 | 2.33617800  |
| C  | 3.09824200  | -2.34025800 | -1.13506500 |
| H  | 1.06050300  | -1.76512800 | -1.52877000 |

|   |             |             |             |
|---|-------------|-------------|-------------|
| C | 3.95428900  | -2.90410300 | -0.18857400 |
| H | 4.22034600  | -3.76240200 | 1.75923800  |
| H | 3.49286400  | -2.01532000 | -2.08962700 |
| N | 5.38615000  | -3.04550300 | -0.52428100 |
| O | 5.74828600  | -2.65466000 | -1.63168100 |
| O | 6.12020000  | -3.54521800 | 0.32483600  |
| C | -0.23501300 | 3.04378000  | -0.16042100 |
| C | 0.95607800  | 2.31580700  | -0.10926600 |
| C | -0.25506500 | 4.42834200  | 0.01012100  |
| C | 2.15298000  | 2.98325100  | 0.12634100  |
| H | 0.93717500  | 1.24510500  | -0.27619700 |
| C | 0.94177300  | 5.10213400  | 0.24586400  |
| H | -1.19498000 | 4.96498200  | -0.05412300 |
| C | 2.12293400  | 4.36649100  | 0.30273900  |
| H | 3.09932900  | 2.45887300  | 0.16986100  |
| H | 0.97219900  | 6.17611600  | 0.38084900  |
| N | 3.39134100  | 5.07652500  | 0.55195600  |
| O | 3.34188700  | 6.29616900  | 0.70057400  |
| O | 4.42025600  | 4.40388400  | 0.59723300  |
| C | -3.84936000 | -1.38107900 | 0.72175600  |
| C | -3.76498500 | -1.05152300 | -0.72228500 |
| H | -3.52855500 | -2.38902500 | 0.98347400  |
| C | -3.99088300 | -2.28317900 | -1.60777800 |
| H | -3.34603100 | -3.11808300 | -1.32055900 |
| H | -5.03400200 | -2.60418600 | -1.49480700 |
| H | -3.82572600 | -2.05781900 | -2.66757600 |
| C | -4.54781200 | 0.15642400  | -1.21951300 |
| H | -5.61734000 | -0.07714800 | -1.14388300 |
| H | -4.35781200 | 1.06358000  | -0.64546400 |
| H | -4.32552200 | 0.37328500  | -2.26885300 |

|   |             |             |            |
|---|-------------|-------------|------------|
| C | -4.31460800 | -0.58319700 | 1.69565800 |
| H | -4.63433300 | 0.42843700  | 1.45768400 |
| C | -4.42238900 | -0.98518600 | 3.13479200 |
| H | -4.03924600 | -1.99556800 | 3.30777100 |
| H | -3.86175200 | -0.28781500 | 3.77077100 |
| H | -5.46607800 | -0.94496500 | 3.47464300 |
| H | -1.26995300 | -0.44566800 | 1.23613000 |

33

0 imaginary frequency

H = -4716.559120

G = -4716.652219

Esol = -4716.979149

|    |             |             |             |
|----|-------------|-------------|-------------|
| Se | 1.04505800  | -1.25904300 | -1.61546400 |
| N  | -0.49446200 | -1.29055400 | -0.56769800 |
| N  | 2.38285200  | -1.32135200 | -0.30809900 |
| S  | -1.02200600 | 0.09716900  | 0.27578300  |
| O  | -0.55354100 | 1.25627900  | -0.47898000 |
| O  | -0.73956800 | -0.05965700 | 1.70831000  |
| S  | 3.61055900  | -0.13429600 | -0.51632800 |
| O  | 4.01432700  | -0.06134800 | -1.92707100 |
| O  | 4.60242400  | -0.41229000 | 0.52810900  |
| C  | 2.75340800  | 1.39165600  | -0.12018500 |
| C  | 2.41153200  | 1.65625200  | 1.20757000  |
| C  | 2.49603800  | 2.29986800  | -1.14643500 |
| C  | 1.79067100  | 2.86125700  | 1.51729100  |
| H  | 2.63184400  | 0.93547600  | 1.98664400  |
| C  | 1.87554700  | 3.50753100  | -0.83847600 |
| H  | 2.78568800  | 2.06167700  | -2.16301400 |

|   |             |             |             |
|---|-------------|-------------|-------------|
| C | 1.53299500  | 3.76238700  | 0.48611300  |
| H | 1.50271500  | 3.10785100  | 2.53116800  |
| H | 1.65353100  | 4.24285000  | -1.60137400 |
| N | 0.86932700  | 5.03955500  | 0.81233200  |
| O | 0.65199500  | 5.82069600  | -0.11209900 |
| O | 0.57581700  | 5.24414300  | 1.98882200  |
| C | -2.80643000 | -0.02400200 | 0.06704200  |
| C | -3.59044100 | -0.44143100 | 1.14295400  |
| C | -3.36880800 | 0.32951600  | -1.16278200 |
| C | -4.97274800 | -0.52373100 | 0.98348200  |
| H | -3.12348300 | -0.68312500 | 2.09112500  |
| C | -4.74784000 | 0.24763000  | -1.32508300 |
| H | -2.73659300 | 0.67324500  | -1.97406700 |
| C | -5.52328200 | -0.18194300 | -0.24848100 |
| H | -5.62054500 | -0.84052000 | 1.79128900  |
| H | -5.22750100 | 0.51213500  | -2.25913300 |
| N | -6.98765900 | -0.27327100 | -0.42090900 |
| O | -7.44937300 | 0.03624100  | -1.51697000 |
| O | -7.64901300 | -0.65536000 | 0.54201000  |
| C | 1.70003300  | -3.51809500 | 0.58921400  |
| C | 1.17716400  | -3.46962100 | 1.82747200  |
| H | 1.28745100  | -4.23437000 | -0.12178100 |
| C | 0.04200600  | -4.38350800 | 2.22373200  |
| H | -0.28579300 | -5.02006900 | 1.39568700  |
| H | 0.34307800  | -5.03518200 | 3.05499100  |
| H | -0.82189100 | -3.80743400 | 2.58322100  |
| C | 1.63559900  | -2.51798800 | 2.90361900  |
| H | 1.76418800  | -3.04560300 | 3.85718500  |
| H | 2.57434700  | -2.01519600 | 2.66001600  |
| H | 0.87572900  | -1.74151600 | 3.06262300  |

|   |             |             |             |
|---|-------------|-------------|-------------|
| C | 2.86699000  | -2.70236400 | 0.07439400  |
| H | 3.58256800  | -2.52078900 | 0.87965100  |
| C | 3.57728100  | -3.41345000 | -1.08164100 |
| H | 2.89016000  | -3.54800000 | -1.92547200 |
| H | 4.44302800  | -2.84251300 | -1.42794600 |
| H | 3.92146700  | -4.40229300 | -0.75984400 |
| H | -0.50206200 | -2.10521000 | 0.04832900  |

34

0 imaginary frequency

H = -4716.497229

G = -4716.592280

Esol = -4716.915383

|    |             |             |             |
|----|-------------|-------------|-------------|
| Se | -1.87435600 | -0.35543600 | -0.74652900 |
| N  | -2.16798800 | 1.32837200  | -0.98926000 |
| N  | -0.86587200 | -0.60392800 | 0.67513300  |
| S  | -1.90790700 | 2.54592800  | 0.16145000  |
| O  | -2.29798300 | 2.09295700  | 1.50272100  |
| O  | -2.51275400 | 3.73969100  | -0.42731800 |
| S  | -0.46284000 | -2.23077700 | 0.82494500  |
| O  | -1.16020500 | -3.01281100 | -0.22363800 |
| O  | -0.60421600 | -2.63078900 | 2.22552600  |
| C  | 1.29475700  | -2.22188600 | 0.42458700  |
| C  | 2.17495700  | -2.88537100 | 1.27907800  |
| C  | 1.73114100  | -1.62473000 | -0.76136800 |
| C  | 3.52414500  | -2.96284900 | 0.93611700  |
| H  | 1.80465200  | -3.32850600 | 2.19672300  |
| C  | 3.07489200  | -1.70174200 | -1.10844700 |
| H  | 1.03156400  | -1.09079700 | -1.39539100 |

|   |             |             |             |
|---|-------------|-------------|-------------|
| C | 3.94671100  | -2.37405400 | -0.25216100 |
| H | 4.24286600  | -3.46801200 | 1.56929500  |
| H | 3.45575500  | -1.25359500 | -2.01758500 |
| N | 5.37408000  | -2.46229600 | -0.62182800 |
| O | 5.71751800  | -1.94022900 | -1.68015100 |
| O | 6.12376400  | -3.05488500 | 0.15052300  |
| C | -0.12355800 | 2.77964300  | 0.14578500  |
| C | 0.65609500  | 2.19301600  | 1.14431800  |
| C | 0.43630600  | 3.57632400  | -0.85727000 |
| C | 2.03428500  | 2.39772900  | 1.13190500  |
| H | 0.18671200  | 1.58763800  | 1.90990900  |
| C | 1.81290900  | 3.77952600  | -0.87297900 |
| H | -0.20175000 | 4.04230700  | -1.60008700 |
| C | 2.58605900  | 3.18244100  | 0.12189500  |
| H | 2.67844300  | 1.96652800  | 1.88796400  |
| H | 2.28985200  | 4.39104100  | -1.62866200 |
| N | 4.04729700  | 3.39607200  | 0.10791700  |
| O | 4.50925700  | 4.10175500  | -0.78644200 |
| O | 4.70922800  | 2.85218500  | 0.98965500  |
| C | -4.21368200 | -1.52667400 | -0.19839600 |
| C | -4.39554100 | -0.61058100 | 0.80854200  |
| H | -3.71483100 | -2.46251100 | 0.05314100  |
| C | -3.80027100 | -0.82539900 | 2.16352100  |
| H | -4.58611100 | -0.76940500 | 2.92898400  |
| H | -3.28574300 | -1.78419200 | 2.25685300  |
| C | -5.16912000 | 0.65507900  | 0.57498600  |
| H | -4.68143900 | 1.26126100  | -0.20213800 |
| H | -6.18332500 | 0.43795000  | 0.21608600  |
| H | -5.23175200 | 1.26430200  | 1.47837300  |
| C | -4.83595300 | -1.45128100 | -1.57368300 |



|   |             |             |             |
|---|-------------|-------------|-------------|
| H | -5.91250100 | -1.66265300 | -1.48149700 |
| C | -4.20613400 | -2.43844600 | -2.56568600 |
| H | -4.64482200 | -2.32720700 | -3.56197000 |
| H | -3.12591900 | -2.27700900 | -2.64593700 |
| H | -4.35695700 | -3.47381900 | -2.24109700 |
| H | -4.77420800 | -0.42687000 | -1.96539000 |
| H | -3.08793300 | -0.01906100 | 2.38687600  |

35

0 imaginary frequency

H = -4716.522413

G = -4716.615313

Esol = -4716.941567

|    |             |             |             |
|----|-------------|-------------|-------------|
| Se | 2.14916800  | 0.05529500  | -0.93404100 |
| N  | 0.65072000  | -0.87877000 | -0.81543900 |
| N  | 2.35292600  | 1.07564200  | 0.65130500  |
| S  | 0.35372700  | -1.72213300 | 0.57657100  |
| O  | 0.62838600  | -0.88039300 | 1.77042400  |
| O  | 0.91868800  | -3.08448400 | 0.57958600  |
| S  | 2.01216000  | 2.72750600  | 0.49782400  |
| O  | 2.73860300  | 3.15615100  | -0.69701300 |
| O  | 2.23649000  | 3.30193600  | 1.82065300  |
| C  | 0.25145100  | 2.83326000  | 0.13568900  |
| C  | -0.18014000 | 2.70882300  | -1.18772700 |
| C  | -0.64754700 | 2.99349300  | 1.19277100  |
| C  | -1.54566000 | 2.72893700  | -1.45925600 |
| H  | 0.53992100  | 2.61291500  | -1.99262500 |
| C  | -2.01415700 | 3.00790200  | 0.92406000  |
| H  | -0.27842800 | 3.11469600  | 2.20529000  |

|   |             |             |             |
|---|-------------|-------------|-------------|
| C | -2.43577000 | 2.86550300  | -0.39683500 |
| H | -1.92553200 | 2.63896000  | -2.46934000 |
| H | -2.74697200 | 3.12628500  | 1.71281500  |
| N | -3.88470200 | 2.85006900  | -0.67983700 |
| O | -4.23430300 | 2.91775100  | -1.85470200 |
| O | -4.64611900 | 2.76173300  | 0.28287700  |
| C | -1.43051900 | -1.89987200 | 0.42417700  |
| C | -2.25706000 | -0.82539600 | 0.75975200  |
| C | -1.95297600 | -3.12252000 | 0.00267200  |
| C | -3.63780200 | -0.96661200 | 0.65664000  |
| H | -1.82327900 | 0.10458900  | 1.10811300  |
| C | -3.33457900 | -3.27073000 | -0.10167400 |
| H | -1.28384100 | -3.94264900 | -0.23113200 |
| C | -4.14964600 | -2.19008700 | 0.22515200  |
| H | -4.31283900 | -0.15418100 | 0.89852700  |
| H | -3.78365000 | -4.20169600 | -0.42430400 |
| N | -5.61384300 | -2.35006900 | 0.11830900  |
| O | -6.03868700 | -3.43180300 | -0.28402000 |
| O | -6.31409100 | -1.39277200 | 0.43908800  |
| C | 3.84094200  | -1.12753100 | -0.69616200 |
| C | 4.35282200  | -1.21291400 | 0.71454500  |
| H | 4.50161800  | -0.48365600 | -1.29045300 |
| C | 3.94154900  | -2.15635700 | 1.57329300  |
| H | 4.35370600  | -2.19977700 | 2.57783200  |
| H | 3.17789000  | -2.88650100 | 1.32987600  |
| C | 5.40946100  | -0.19544700 | 1.07803800  |
| H | 5.70624500  | -0.28672600 | 2.12655700  |
| H | 6.30691500  | -0.32553700 | 0.45741300  |
| H | 5.04587100  | 0.82476700  | 0.91273500  |
| C | 3.54752400  | -2.41769600 | -1.46828900 |

|   |            |             |             |
|---|------------|-------------|-------------|
| H | 2.83561000 | -3.03064200 | -0.90918500 |
| C | 4.82995900 | -3.20864600 | -1.76246800 |
| H | 4.58984600 | -4.11649700 | -2.32558600 |
| H | 5.53684300 | -2.62081300 | -2.36016500 |
| H | 5.33093700 | -3.50642100 | -0.83658200 |
| H | 3.05475300 | -2.16611700 | -2.41807500 |
| H | 1.87393500 | 0.60530900  | 1.43358300  |

36

0 imaginary frequency

H = -4716.551845

G = -4716.644879

Esol = -4716.972727

|    |             |             |             |
|----|-------------|-------------|-------------|
| Se | -2.00366900 | 0.01354700  | -1.08937400 |
| N  | -0.19399200 | 0.52503100  | -1.16947700 |
| N  | -2.02646700 | -0.48180500 | 0.68270900  |
| S  | 0.14296100  | 2.20133800  | -1.12030600 |
| O  | -0.79345000 | 2.76257100  | -0.14517300 |
| O  | 0.25897700  | 2.76060500  | -2.47014500 |
| S  | -2.05092000 | -2.15979600 | 0.99428100  |
| O  | -3.04651900 | -2.83186400 | 0.15352900  |
| O  | -2.07504200 | -2.30389500 | 2.45255200  |
| C  | -0.42972200 | -2.65776800 | 0.38933000  |
| C  | 0.65941500  | -2.60526900 | 1.26058500  |
| C  | -0.29766200 | -3.09269400 | -0.93191300 |
| C  | 1.91865800  | -2.97879300 | 0.79785400  |
| H  | 0.51595600  | -2.29156700 | 2.28880200  |
| C  | 0.96204000  | -3.45892700 | -1.39979800 |
| H  | -1.17004100 | -3.15471900 | -1.57167100 |

|   |             |             |             |
|---|-------------|-------------|-------------|
| C | 2.04703400  | -3.38865700 | -0.52765700 |
| H | 2.79050000  | -2.95950500 | 1.43989100  |
| H | 1.11309300  | -3.80506000 | -2.41485900 |
| N | 3.38316600  | -3.77230200 | -1.02599700 |
| O | 3.47206600  | -4.11623300 | -2.20299800 |
| O | 4.32130500  | -3.71749300 | -0.23387100 |
| C | 1.78990700  | 2.17960100  | -0.39585300 |
| C | 2.85888600  | 2.67889900  | -1.14006500 |
| C | 1.95447000  | 1.71057700  | 0.91106200  |
| C | 4.13034400  | 2.70402200  | -0.56780100 |
| H | 2.69140400  | 3.04483900  | -2.14685400 |
| C | 3.22142700  | 1.73350600  | 1.48350500  |
| H | 1.10388400  | 1.33246900  | 1.46740700  |
| C | 4.28602900  | 2.23027300  | 0.73127500  |
| H | 4.98908700  | 3.08318100  | -1.10760100 |
| H | 3.39771100  | 1.38174100  | 2.49231100  |
| N | 5.63219100  | 2.25654200  | 1.34063600  |
| O | 6.55245100  | 2.70574300  | 0.66191700  |
| O | 5.74243500  | 1.82731000  | 2.48698100  |
| C | -4.34373200 | 1.97474200  | 0.72195300  |
| C | -4.09384200 | 0.80285700  | 1.33157100  |
| H | -3.48980200 | 2.62350000  | 0.52157100  |
| C | -2.65695400 | 0.46848100  | 1.66357600  |
| H | -2.03354700 | 1.36451300  | 1.64271500  |
| C | -5.11709600 | -0.24586500 | 1.69172300  |
| H | -5.07546300 | -0.47598400 | 2.76447900  |
| H | -6.13737800 | 0.06360500  | 1.45489700  |
| H | -4.92553300 | -1.18855300 | 1.16305700  |
| C | -5.65874300 | 2.51438600  | 0.23309400  |
| H | -6.49010300 | 1.85973000  | 0.51415100  |

|   |             |             |             |
|---|-------------|-------------|-------------|
| C | -5.65828900 | 2.72086800  | -1.29300200 |
| H | -4.85638100 | 3.40250600  | -1.59915100 |
| H | -5.50220500 | 1.76998600  | -1.81492500 |
| H | -5.84849200 | 3.48289100  | 0.71890000  |
| H | -2.56067400 | -0.00664200 | 2.64382700  |
| H | -6.60994700 | 3.14521400  | -1.63194100 |
| H | 0.29489000  | 0.07496300  | -1.94395700 |

37

0 imaginary frequency

H = -4716.548944

G = -4716.642083

Esol = -4716.969668

|    |             |             |             |
|----|-------------|-------------|-------------|
| Se | 2.19688300  | -0.33840000 | 0.86035400  |
| N  | 0.47157000  | 0.05073200  | 1.39294700  |
| N  | 1.93386500  | -0.35782600 | -1.00512000 |
| S  | 0.00656500  | 1.60165000  | 1.91914400  |
| O  | 1.06030600  | 2.52281100  | 1.50282000  |
| O  | -0.42953700 | 1.50988600  | 3.31455600  |
| S  | 1.84582700  | -1.97477900 | -1.63978800 |
| O  | 2.98274200  | -2.77731700 | -1.17348800 |
| O  | 1.56526200  | -1.83172900 | -3.07128600 |
| C  | 0.36251100  | -2.59929000 | -0.83213800 |
| C  | -0.87747900 | -2.34752100 | -1.42105500 |
| C  | 0.48639000  | -3.36050700 | 0.33309000  |
| C  | -2.03034100 | -2.84476700 | -0.81726100 |
| H  | -0.93330700 | -1.78725500 | -2.34794300 |
| C  | -0.66513200 | -3.85387100 | 0.94257500  |
| H  | 1.46813400  | -3.56588500 | 0.74339600  |

|   |             |             |             |
|---|-------------|-------------|-------------|
| C | -1.90127300 | -3.58053700 | 0.35844800  |
| H | -3.01308700 | -2.67691800 | -1.24001100 |
| H | -0.62009200 | -4.44995100 | 1.84571800  |
| N | -3.12259500 | -4.10336700 | 1.00643300  |
| O | -2.98144200 | -4.74546600 | 2.04468200  |
| O | -4.19882400 | -3.85812300 | 0.46676200  |
| C | -1.46581700 | 1.89784300  | 0.92569900  |
| C | -2.51444600 | 2.60890500  | 1.51319800  |
| C | -1.51838000 | 1.47423300  | -0.40458200 |
| C | -3.63904000 | 2.91509700  | 0.75002200  |
| H | -2.45360500 | 2.90535400  | 2.55444000  |
| C | -2.64227600 | 1.77666900  | -1.16826600 |
| H | -0.70023000 | 0.89778200  | -0.82239800 |
| C | -3.68015800 | 2.49481300  | -0.57694700 |
| H | -4.47522300 | 3.46329500  | 1.16577800  |
| H | -2.72740000 | 1.46765000  | -2.20265900 |
| N | -4.87286400 | 2.81386100  | -1.38741400 |
| O | -5.76889900 | 3.45887400  | -0.84811600 |
| O | -4.89139500 | 2.41352000  | -2.54963900 |
| C | 3.85428900  | 2.47175300  | -0.61109500 |
| C | 2.91771900  | 1.92556000  | -1.40238600 |
| H | 3.77847000  | 3.54447100  | -0.42634000 |
| C | 1.81553900  | 2.75830600  | -2.00869800 |
| H | 1.87267600  | 3.79764800  | -1.67353200 |
| C | 2.93381800  | 0.46822300  | -1.79085900 |
| H | 2.62609200  | 0.35976000  | -2.83478200 |
| H | 3.93334100  | 0.03381800  | -1.69634100 |
| C | 4.99621100  | 1.80508200  | 0.10693500  |
| H | 4.95640500  | 0.71469400  | -0.00118400 |
| C | 5.01366800  | 2.16714500  | 1.60201600  |

|   |            |             |             |
|---|------------|-------------|-------------|
| H | 5.10163200 | 3.25014900  | 1.74475500  |
| H | 4.08530700 | 1.84371000  | 2.08252800  |
| H | 5.94665900 | 2.12178700  | -0.34843800 |
| H | 1.86548600 | 2.74715000  | -3.10645700 |
| H | 5.85847000 | 1.68996700  | 2.11089400  |
| H | 0.02193800 | -0.68555400 | 1.93318500  |
| H | 0.82566400 | 2.37772800  | -1.73275700 |

38

0 imaginary frequency

H = -390.578480

G = -390.624509

Esol = -390.826210

|   |             |             |             |
|---|-------------|-------------|-------------|
| C | -0.57759200 | 0.54820200  | -0.94968800 |
| C | 0.81248000  | 1.10220300  | -0.66817800 |
| C | 1.80378600  | 0.13698600  | -0.05498700 |
| C | 1.50701200  | -1.14361800 | 0.19675500  |
| C | 0.18612000  | -1.81369400 | -0.07846600 |
| C | -0.89237300 | -0.90758800 | -0.65625300 |
| H | 1.23962600  | 1.46619100  | -1.61533500 |
| H | 2.27542200  | -1.78296800 | 0.63263500  |
| H | 0.36126000  | -2.64031600 | -0.78375500 |
| H | -0.17252500 | -2.30070400 | 0.84265300  |
| H | -1.54178900 | -1.40812400 | -1.37290600 |
| C | 3.16384600  | 0.71458100  | 0.24611700  |
| H | 3.83479600  | -0.03237200 | 0.68247700  |
| H | 3.63996500  | 1.10790900  | -0.66337900 |
| H | 3.09171500  | 1.55782700  | 0.94765300  |
| H | 0.74652800  | 1.99820100  | -0.02919900 |

|   |             |             |             |
|---|-------------|-------------|-------------|
| C | -1.56311400 | 0.19149700  | 0.14968100  |
| H | -1.03132400 | 0.96106800  | -1.84949700 |
| C | -1.20775000 | 0.40818600  | 1.61149800  |
| H | -0.15290000 | 0.21809900  | 1.82336800  |
| H | -1.43124400 | 1.43993600  | 1.91377400  |
| H | -1.80318600 | -0.25350400 | 2.25443200  |
| C | -3.03274800 | 0.44926800  | -0.14856200 |
| H | -3.67863900 | -0.21680000 | 0.43905500  |
| H | -3.31141100 | 1.48256600  | 0.09820700  |
| H | -3.26429400 | 0.28684000  | -1.20768400 |

39

0 imaginary frequency

H = -4871.300251

G = -4871.399131

Esol = -4871.791412

|    |             |             |             |
|----|-------------|-------------|-------------|
| Se | -1.22393000 | -0.55338600 | -0.97905100 |
| N  | -1.52213200 | 1.14203600  | -1.02313200 |
| N  | -0.36711400 | -0.97881000 | 0.49425900  |
| S  | -1.28560400 | 2.23488200  | 0.25265900  |
| O  | -1.76014300 | 1.68702400  | 1.52770800  |
| O  | -1.80502000 | 3.50226700  | -0.25760400 |
| S  | 0.33913800  | -2.50930900 | 0.36444700  |
| O  | -0.14787600 | -3.18429600 | -0.85872900 |
| O  | 0.23629600  | -3.18077400 | 1.65994800  |
| C  | 2.07180900  | -2.07219800 | 0.11036700  |
| C  | 3.02300200  | -2.57567300 | 0.99738300  |
| C  | 2.43516300  | -1.28633600 | -0.98684600 |
| C  | 4.37099800  | -2.28839400 | 0.78307200  |



|   |             |             |             |
|---|-------------|-------------|-------------|
| H | 2.70649500  | -3.17893700 | 1.84078600  |
| C | 3.77783200  | -1.00258300 | -1.20706600 |
| H | 1.67886500  | -0.88097100 | -1.65101100 |
| C | 4.72234400  | -1.50807300 | -0.31389200 |
| H | 5.14278800  | -2.65606900 | 1.44779000  |
| H | 4.10305600  | -0.39890900 | -2.04510600 |
| N | 6.14953000  | -1.20434600 | -0.54577200 |
| O | 6.96513600  | -1.69261100 | 0.23146300  |
| O | 6.42493200  | -0.49037700 | -1.50712200 |
| C | 0.50747600  | 2.36977000  | 0.33569600  |
| C | 1.20382100  | 1.65270200  | 1.31038400  |
| C | 1.16187200  | 3.19619700  | -0.58290500 |
| C | 2.59413100  | 1.73442800  | 1.34373500  |
| H | 0.66153400  | 1.03568700  | 2.01596700  |
| C | 2.55014500  | 3.28685300  | -0.54492400 |
| H | 0.58810900  | 3.76576700  | -1.30586600 |
| C | 3.24033900  | 2.53993600  | 0.40929200  |
| H | 3.17659600  | 1.18525100  | 2.07283600  |
| H | 3.09951600  | 3.91528600  | -1.23493100 |
| N | 4.71512500  | 2.59796700  | 0.42446900  |
| O | 5.30545800  | 1.79383200  | 1.14525600  |
| O | 5.25817500  | 3.43744000  | -0.28881400 |
| C | -4.83908300 | 0.63267300  | 0.73827300  |
| C | -4.12832900 | -0.59397300 | 1.28446000  |
| C | -3.73458200 | -1.64610400 | 0.28652300  |
| C | -3.86274900 | -1.45823800 | -1.05911900 |
| C | -4.52277900 | -0.27483000 | -1.71195000 |
| C | -5.02544400 | 0.79939500  | -0.75847200 |
| H | -3.57092800 | -2.27578800 | -1.71899900 |
| H | -3.81253300 | 0.18533500  | -2.41421000 |

|   |             |             |             |
|---|-------------|-------------|-------------|
| H | -5.33746100 | -0.65548500 | -2.34828500 |
| H | -4.89314200 | 1.80859700  | -1.14094000 |
| C | -3.18273600 | -2.91933000 | 0.85044400  |
| H | -2.81810600 | -3.59942600 | 0.07641500  |
| H | -2.36100000 | -2.71759500 | 1.55016600  |
| H | -3.95932900 | -3.43608300 | 1.43096000  |
| H | -4.71509500 | -1.07697200 | 2.08100400  |
| C | -6.23343900 | 0.59411100  | 0.14188200  |
| H | -4.58894100 | 1.53785600  | 1.28527600  |
| C | -7.02534800 | -0.70260800 | 0.09113500  |
| H | -6.40168300 | -1.58396500 | -0.08342300 |
| H | -7.56504300 | -0.86071100 | 1.03366300  |
| H | -7.77545200 | -0.66587900 | -0.70953100 |
| C | -7.10863100 | 1.81423800  | 0.38793400  |
| H | -7.86030900 | 1.92706300  | -0.40428700 |
| H | -7.64278900 | 1.72937500  | 1.34326900  |
| H | -6.51538000 | 2.73473200  | 0.41885800  |
| H | -3.20110500 | -0.26194400 | 1.77560100  |

4

0 imaginary frequency

H = -1740.801104

G = -1740.889311

Esol = -1741.157206

|   |            |            |             |
|---|------------|------------|-------------|
| C | 4.24509800 | 2.20409300 | 0.27998400  |
| O | 3.38273500 | 1.63164300 | 1.11524700  |
| O | 4.21895500 | 2.10544900 | -0.93706400 |
| C | 5.29418100 | 3.00633100 | 1.03342000  |
| H | 5.82965400 | 2.35640800 | 1.73271900  |

|   |             |             |             |
|---|-------------|-------------|-------------|
| H | 5.99435800  | 3.44992700  | 0.32381800  |
| H | 4.80966200  | 3.79119700  | 1.62276200  |
| I | 1.69615600  | 0.60678500  | 0.20185100  |
| O | -1.61952300 | 1.57132700  | -1.64899900 |
| C | -1.40767300 | 2.59598300  | -0.81917000 |
| O | -0.64184800 | 2.54428000  | 0.13319700  |
| C | -2.22153000 | 3.81321600  | -1.18508300 |
| H | -2.01857100 | 4.10099300  | -2.22175900 |
| H | -3.28939800 | 3.57899600  | -1.11666100 |
| H | -1.97906600 | 4.63661400  | -0.51279800 |
| C | 2.97663400  | -1.09460700 | -0.08512300 |
| C | 2.82071400  | -2.20009000 | 0.74719400  |
| C | 3.93049200  | -1.03443600 | -1.09905500 |
| C | 3.66144000  | -3.29727000 | 0.54156700  |
| H | 2.05562000  | -2.22235000 | 1.51461900  |
| C | 4.76168800  | -2.14313200 | -1.28072600 |
| H | 4.04635100  | -0.14165500 | -1.70207200 |
| C | 4.62680400  | -3.26930100 | -0.46654300 |
| H | 3.55443500  | -4.17253000 | 1.17553400  |
| H | 5.51463500  | -2.11862900 | -2.06329100 |
| H | 5.27565900  | -4.12725500 | -0.61791700 |
| N | -0.02912000 | -0.59327200 | -0.76288600 |
| S | -0.81304000 | -1.77567000 | 0.14745400  |
| O | -0.78401300 | -3.04079600 | -0.59869800 |
| O | -0.32489300 | -1.70269300 | 1.53196000  |
| C | -2.52198000 | -1.20303000 | 0.18346800  |
| C | -3.44721400 | -1.78327100 | -0.68573200 |
| C | -2.88807400 | -0.20062800 | 1.08635800  |
| C | -4.76955000 | -1.34451000 | -0.66348200 |
| H | -3.13376300 | -2.57488600 | -1.35718600 |

|   |             |             |             |
|---|-------------|-------------|-------------|
| C | -4.20728600 | 0.24310600  | 1.10809200  |
| H | -2.15341100 | 0.22231300  | 1.76239400  |
| C | -5.12302900 | -0.33604200 | 0.23008400  |
| H | -5.52073700 | -1.76859500 | -1.31797000 |
| H | -4.53503000 | 1.01698700  | 1.79092600  |
| N | -6.52107100 | 0.13529800  | 0.25121100  |
| O | -6.80396600 | 1.03788400  | 1.03693100  |
| O | -7.31361000 | -0.40220400 | -0.51970200 |
| H | -1.08297500 | 0.78831300  | -1.32963600 |
| H | 0.30129300  | -1.05650600 | -1.61360000 |

40

0 imaginary frequency

H = -4871.324707

G = -4871.422461

Esol = -4871.817037

|    |             |             |             |
|----|-------------|-------------|-------------|
| Se | -1.48399300 | 0.31297900  | -0.30721500 |
| N  | 0.07471500  | 1.17293100  | -0.40408700 |
| N  | -1.32893900 | -0.91283800 | 1.13750200  |
| S  | 0.61982600  | 1.81509500  | 1.02393900  |
| O  | 0.68785700  | 0.77161800  | 2.08220400  |
| O  | -0.04578800 | 3.07611900  | 1.40232600  |
| S  | -1.47613000 | -2.54729000 | 0.79482700  |
| O  | -2.33456200 | -2.59586400 | -0.39457100 |
| O  | -1.84331100 | -3.22935800 | 2.03298700  |
| C  | 0.16814400  | -3.13686300 | 0.33564500  |
| C  | 0.55404900  | -4.39986700 | 0.78967100  |
| C  | 0.99271400  | -2.37327700 | -0.49586200 |
| C  | 1.78628300  | -4.91816300 | 0.39686400  |

|   |             |             |             |
|---|-------------|-------------|-------------|
| H | -0.09911600 | -4.96028400 | 1.44896200  |
| C | 2.22441300  | -2.88845700 | -0.88847500 |
| H | 0.70186700  | -1.38001500 | -0.81924100 |
| C | 2.59719000  | -4.15311100 | -0.43676100 |
| H | 2.12329200  | -5.89266600 | 0.72759800  |
| H | 2.89242100  | -2.32942700 | -1.53187400 |
| N | 3.90574800  | -4.69713100 | -0.85225500 |
| O | 4.20442700  | -5.82091400 | -0.45519600 |
| O | 4.61133300  | -3.98937000 | -1.56810000 |
| C | 2.30681600  | 2.21030300  | 0.54484300  |
| C | 3.25177400  | 1.18512300  | 0.45589500  |
| C | 2.64485100  | 3.54304700  | 0.31149100  |
| C | 4.56223800  | 1.49704600  | 0.10810500  |
| H | 2.96567100  | 0.16082400  | 0.66751700  |
| C | 3.95593600  | 3.86051600  | -0.03803600 |
| H | 1.88988100  | 4.31480200  | 0.40968700  |
| C | 4.88808900  | 2.83092500  | -0.13547000 |
| H | 5.32787100  | 0.73544700  | 0.02789200  |
| H | 4.26258700  | 4.88125000  | -0.22918000 |
| N | 6.27810700  | 3.16497900  | -0.50503500 |
| O | 7.08369000  | 2.23948500  | -0.57970600 |
| O | 6.54129100  | 4.34730500  | -0.71560800 |
| C | -4.68839100 | 0.72306900  | -1.50164500 |
| C | -4.07221900 | 2.07347900  | -1.51562300 |
| C | -3.21569300 | 2.50384800  | -0.56738500 |
| C | -2.85568400 | 1.55740000  | 0.55631500  |
| C | -4.02432800 | 0.67628400  | 1.00766900  |
| C | -4.68555800 | -0.02524900 | -0.17858800 |
| H | -2.34290300 | 2.05041200  | 1.38369700  |
| H | -3.68527600 | -0.05686900 | 1.74426600  |

|   |             |             |             |
|---|-------------|-------------|-------------|
| H | -4.72664800 | 1.33709100  | 1.53032200  |
| H | -4.49728600 | -1.09461900 | -0.23010200 |
| C | -2.58814600 | 3.87139400  | -0.57713700 |
| H | -1.49556000 | 3.80414300  | -0.59032100 |
| H | -2.92014000 | 4.44708500  | -1.44669200 |
| H | -2.84964100 | 4.43341600  | 0.32897700  |
| H | -4.33459800 | 2.74311100  | -2.33449700 |
| C | -6.00464000 | 0.43947500  | -0.77201100 |
| H | -4.53082400 | 0.13981100  | -2.40894400 |
| C | -6.79064400 | 1.57421300  | -0.14017500 |
| H | -6.15616500 | 2.40494700  | 0.18003000  |
| H | -7.51644100 | 1.97667200  | -0.85756600 |
| H | -7.35376500 | 1.21821000  | 0.73204400  |
| C | -6.88467300 | -0.64335900 | -1.37587700 |
| H | -7.53158100 | -1.09054900 | -0.61044900 |
| H | -7.53224400 | -0.23207200 | -2.16056600 |
| H | -6.28823900 | -1.44834800 | -1.81902500 |
| H | -0.62859300 | -0.62295700 | 1.83423700  |

41

0 imaginary frequency

H = -4871.302423

G = -4871.401505

Esol = -4871.793563

|    |             |             |             |
|----|-------------|-------------|-------------|
| Se | -1.32354800 | 0.70639700  | 1.14622000  |
| N  | -0.76191900 | -0.12061800 | -0.29509000 |
| N  | -0.95183100 | 2.38783700  | 1.04196200  |
| S  | -0.65771700 | -1.79095300 | -0.06127000 |
| O  | -1.11254200 | -2.45899800 | -1.28040000 |

|   |             |             |             |
|---|-------------|-------------|-------------|
| O | -1.23275100 | -2.16344100 | 1.24903900  |
| S | -0.32312300 | 3.17419700  | -0.32205800 |
| O | -0.26835500 | 4.58237600  | 0.06567700  |
| O | -1.01897600 | 2.75623900  | -1.54510200 |
| C | 1.37088600  | 2.57292100  | -0.41800600 |
| C | 2.32491200  | 3.11196900  | 0.45054800  |
| C | 1.70182600  | 1.60699400  | -1.36967200 |
| C | 3.63771900  | 2.65491500  | 0.38458900  |
| H | 2.04286400  | 3.88721800  | 1.15469000  |
| C | 3.01378400  | 1.14268500  | -1.43266400 |
| H | 0.93887700  | 1.22655600  | -2.03746400 |
| C | 3.95304000  | 1.66752500  | -0.54842700 |
| H | 4.41057700  | 3.04528300  | 1.03509000  |
| H | 3.31345500  | 0.38616700  | -2.14697400 |
| N | 5.33552300  | 1.15318800  | -0.59665800 |
| O | 6.18426900  | 1.74084000  | 0.06822700  |
| O | 5.54630800  | 0.16201800  | -1.29567800 |
| C | 1.12790200  | -2.01243300 | 0.06051600  |
| C | 1.82304800  | -1.40154500 | 1.10772000  |
| C | 1.76830800  | -2.83755300 | -0.86303000 |
| C | 3.18805800  | -1.62635700 | 1.24053600  |
| H | 1.30740600  | -0.74464500 | 1.80074600  |
| C | 3.13923000  | -3.06213200 | -0.73540200 |
| H | 1.19750700  | -3.29464800 | -1.66355300 |
| C | 3.82199700  | -2.45302700 | 0.31269100  |
| H | 3.76545800  | -1.17594400 | 2.03821400  |
| H | 3.67845000  | -3.69551000 | -1.42879500 |
| N | 5.27277500  | -2.69434000 | 0.45470000  |
| O | 5.79710400  | -3.47121300 | -0.33829400 |
| O | 5.85482400  | -2.10831500 | 1.36440100  |

|   |             |             |             |
|---|-------------|-------------|-------------|
| C | -4.26235700 | -1.24154200 | -1.02484400 |
| C | -3.97631800 | 0.23907600  | -1.21517000 |
| C | -4.05209300 | 1.10096400  | 0.01000100  |
| C | -4.10563100 | 0.56221200  | 1.26501600  |
| C | -4.29107000 | -0.89538500 | 1.58214700  |
| C | -4.41208500 | -1.81211100 | 0.37408200  |
| H | -4.14814700 | 1.24907800  | 2.11135800  |
| H | -3.44864600 | -1.24062700 | 2.19758100  |
| H | -5.17311700 | -0.98274000 | 2.23620300  |
| H | -3.96345100 | -2.78854500 | 0.53534800  |
| C | -4.06487600 | 2.58609000  | -0.20049800 |
| H | -3.30749800 | 2.89102300  | -0.93006300 |
| H | -5.04110400 | 2.88483200  | -0.60857200 |
| H | -4.61345500 | 0.67607600  | -1.99817900 |
| C | -5.60425200 | -1.78458800 | -0.56805200 |
| H | -3.72114500 | -1.86721700 | -1.72947600 |
| C | -6.78479500 | -0.86105400 | -0.31300800 |
| H | -7.49993100 | -1.33212600 | 0.37376200  |
| H | -6.49877500 | 0.10096500  | 0.12090600  |
| H | -7.32116600 | -0.65563100 | -1.24833100 |
| C | -6.02240000 | -3.12275400 | -1.16093200 |
| H | -6.70904000 | -3.65411100 | -0.48900400 |
| H | -6.53722500 | -2.98445200 | -2.12063800 |
| H | -5.15785900 | -3.77208300 | -1.33696200 |
| H | -2.94627500 | 0.34590300  | -1.59999800 |
| H | -3.90359400 | 3.13804300  | 0.72969100  |

42

0 imaginary frequency



H = -4871.310992

G = -4871.408394

Esol = -4871.803313

|    |             |             |             |
|----|-------------|-------------|-------------|
| Se | 0.64921200  | 1.06517800  | -0.59673500 |
| N  | 1.75148300  | 0.02877800  | 0.30838700  |
| N  | -0.86935900 | 0.96772300  | 0.56082900  |
| S  | 2.62000400  | -0.97657700 | -0.69492300 |
| O  | 4.00759600  | -0.97816400 | -0.21479900 |
| O  | 2.33329100  | -0.65437700 | -2.11063000 |
| S  | -1.81020100 | -0.43843200 | 0.34548200  |
| O  | -1.78170900 | -1.21447300 | 1.58398800  |
| O  | -1.40576400 | -0.99639900 | -0.94913000 |
| C  | -3.46998200 | 0.22903100  | 0.15310200  |
| C  | -4.30063800 | 0.30734900  | 1.27232300  |
| C  | -3.89576200 | 0.63542800  | -1.11369100 |
| C  | -5.58594800 | 0.82426800  | 1.12616100  |
| H  | -3.95037400 | -0.04587100 | 2.23586400  |
| C  | -5.17979200 | 1.15210500  | -1.26186700 |
| H  | -3.23838400 | 0.53168600  | -1.96984200 |
| C  | -5.99792700 | 1.24152400  | -0.13714100 |
| H  | -6.26594900 | 0.90220200  | 1.96525300  |
| H  | -5.55445500 | 1.47716900  | -2.22442600 |
| N  | -7.35929100 | 1.79481100  | -0.29284500 |
| O  | -8.06192600 | 1.86115600  | 0.71304200  |
| O  | -7.69838000 | 2.15551300  | -1.41760900 |
| C  | 1.97851400  | -2.63078200 | -0.37403300 |
| C  | 1.00405300  | -3.16682300 | -1.21780100 |
| C  | 2.47947600  | -3.34797500 | 0.71571200  |
| C  | 0.51028500  | -4.44330600 | -0.96118800 |
| H  | 0.64208500  | -2.59236100 | -2.06161700 |

|   |             |             |             |
|---|-------------|-------------|-------------|
| C | 1.98620400  | -4.62236200 | 0.97758200  |
| H | 3.25557300  | -2.91524100 | 1.33683200  |
| C | 1.00767600  | -5.14628200 | 0.13392700  |
| H | -0.24505600 | -4.89600700 | -1.59101000 |
| H | 2.34719700  | -5.21190900 | 1.81092800  |
| N | 0.48443100  | -6.49683900 | 0.40772700  |
| O | 0.93626100  | -7.09706600 | 1.38211700  |
| O | -0.37279400 | -6.94235300 | -0.35397900 |
| C | 3.88973200  | 2.42261500  | 0.51663700  |
| C | 2.99292100  | 2.47767700  | 1.75241200  |
| C | 1.54749700  | 2.90381300  | 1.51745500  |
| C | 1.03828500  | 2.94007700  | 0.11066900  |
| C | 2.00662700  | 3.57420900  | -0.89593900 |
| C | 3.39589600  | 2.95684000  | -0.81921000 |
| H | 0.03890700  | 3.37941000  | 0.04946600  |
| H | 1.60397000  | 3.46883300  | -1.91065300 |
| H | 2.02089400  | 4.65158900  | -0.68827000 |
| H | 3.66518800  | 2.36252400  | -1.68977400 |
| C | 0.73938800  | 3.27064200  | 2.52435100  |
| H | 1.09280300  | 3.30006600  | 3.55222700  |
| H | -0.29065700 | 3.57570000  | 2.35611700  |
| H | 3.42579600  | 3.12050800  | 2.52937000  |
| C | 4.55226700  | 3.63671800  | -0.09814800 |
| H | 4.45175300  | 1.49583200  | 0.44582300  |
| C | 4.36052700  | 5.00515600  | 0.53290100  |
| H | 4.46300000  | 5.80218100  | -0.21511700 |
| H | 3.38700900  | 5.12674800  | 1.01843700  |
| H | 5.12603500  | 5.17779000  | 1.29993400  |
| C | 5.93552700  | 3.43698200  | -0.69767900 |
| H | 6.13702400  | 4.17777600  | -1.48251500 |

|   |             |            |             |
|---|-------------|------------|-------------|
| H | 6.71407300  | 3.54308900 | 0.06868600  |
| H | 6.03897500  | 2.44097900 | -1.14126900 |
| H | 2.96369200  | 1.46427800 | 2.16481700  |
| H | -0.53154200 | 1.01368200 | 1.52888900  |

42b

0 imaginary frequency

H = -464.655773

G = -464.704373

Esol = -464.885289

|   |             |             |             |
|---|-------------|-------------|-------------|
| C | -1.11034800 | -1.48401600 | 0.35328800  |
| C | 0.38155200  | -1.32071500 | 0.46772600  |
| C | 0.89362800  | -0.05077700 | -0.25173000 |
| C | 0.01711800  | 1.13845500  | 0.16476300  |
| C | -1.46266300 | 0.89774700  | -0.10848500 |
| C | -1.97234000 | -0.49089500 | 0.06328200  |
| H | 0.66690500  | -1.27515900 | 1.53153300  |
| H | -1.50214900 | -2.48830400 | 0.51820700  |
| H | 0.87107000  | -2.21733800 | 0.06844700  |
| C | -3.45696500 | -0.68745200 | -0.08471200 |
| H | -3.79151900 | -0.37778400 | -1.08124800 |
| H | -3.73725300 | -1.73372800 | 0.07112000  |
| H | -4.00694200 | -0.06376200 | 0.62931700  |
| O | -2.21251300 | 1.81547300  | -0.41102500 |
| C | 2.38927800  | 0.15299400  | -0.05748800 |
| C | 3.28116500  | -0.87257500 | -0.72022000 |
| C | 2.90952300  | 1.16824600  | 0.64027100  |
| H | 2.29992700  | 1.92859100  | 1.11783800  |
| H | 3.07951600  | -0.93209700 | -1.79855200 |

|   |            |             |             |
|---|------------|-------------|-------------|
| H | 3.11986200 | -1.88033000 | -0.31555300 |
| H | 0.30882000 | 2.06378700  | -0.34033400 |
| H | 3.98502200 | 1.27722500  | 0.75509900  |
| H | 0.12032900 | 1.31440600  | 1.24692000  |
| H | 0.72802500 | -0.21824600 | -1.32858600 |
| H | 4.33880900 | -0.62711100 | -0.58617300 |

43

0 imaginary frequency

H = -4871.297897

G = -4871.396822

Esol = -4871.789410

|    |             |             |             |
|----|-------------|-------------|-------------|
| Se | -1.29354300 | 0.53919500  | -1.19105000 |
| N  | -0.85949700 | 2.20160900  | -1.36282700 |
| N  | -0.57716800 | -0.12316400 | 0.26993500  |
| S  | -0.41339500 | 3.21320000  | -0.08732900 |
| O  | -1.25337400 | 2.94033000  | 1.08815200  |
| O  | -0.36469800 | 4.55007200  | -0.67655400 |
| S  | -0.56142000 | -1.80712500 | 0.23392200  |
| O  | -1.31277100 | -2.30125100 | -0.94155500 |
| O  | -0.89442400 | -2.31045700 | 1.56729000  |
| C  | 1.18888200  | -2.14169100 | -0.05865100 |
| C  | 1.78925500  | -3.16879700 | 0.67034000  |
| C  | 1.88352800  | -1.44239500 | -1.04949400 |
| C  | 3.11029400  | -3.51636500 | 0.39313100  |
| H  | 1.22905500  | -3.68089100 | 1.44460600  |
| C  | 3.20109800  | -1.78677600 | -1.32975400 |
| H  | 1.40930800  | -0.62269000 | -1.57739600 |
| C  | 3.78869800  | -2.82296000 | -0.60513100 |

|   |             |             |             |
|---|-------------|-------------|-------------|
| H | 3.61455300  | -4.30754700 | 0.93388600  |
| H | 3.77535200  | -1.27012400 | -2.08852100 |
| N | 5.18524300  | -3.19591400 | -0.90805900 |
| O | 5.68042900  | -4.11327000 | -0.25779200 |
| O | 5.75891500  | -2.56689500 | -1.79459600 |
| C | 1.27824300  | 2.75435400  | 0.32085400  |
| C | 1.52800800  | 1.97042900  | 1.44827000  |
| C | 2.31293400  | 3.23511600  | -0.48733100 |
| C | 2.84464400  | 1.64814600  | 1.77011500  |
| H | 0.70266400  | 1.61989600  | 2.05528200  |
| C | 3.62876700  | 2.91020700  | -0.17143900 |
| H | 2.08871100  | 3.87040800  | -1.33723600 |
| C | 3.86850800  | 2.11973900  | 0.95188600  |
| H | 3.08533400  | 1.04621800  | 2.63742100  |
| H | 4.46148500  | 3.26294100  | -0.76701800 |
| N | 5.26372400  | 1.77525600  | 1.29152700  |
| O | 5.44925400  | 1.06381600  | 2.27700700  |
| O | 6.15090000  | 2.21922700  | 0.56564800  |
| C | -4.51240700 | -1.73831300 | -0.02690700 |
| C | -4.43646900 | -0.85734400 | -1.26479300 |
| C | -3.68528200 | 1.05643600  | 0.18762000  |
| C | -4.09510400 | -1.19035900 | 1.32517600  |
| H | -3.44529200 | 2.11192400  | 0.29549700  |
| H | -4.07887300 | 0.79094600  | 2.24475500  |
| H | -3.55148000 | -1.88012500 | 1.96490000  |
| C | -4.22676800 | 1.51172100  | -2.21887900 |
| H | -3.77634900 | 1.08192900  | -3.12332300 |
| H | -5.29295800 | 1.65216300  | -2.44213700 |
| H | -3.78203600 | 2.49414700  | -2.03995700 |
| H | -3.68852200 | -1.28818200 | -1.94727000 |

|   |             |             |             |
|---|-------------|-------------|-------------|
| C | -5.54953100 | -1.54492800 | 1.06571700  |
| H | -4.22810900 | -2.76809100 | -0.22754400 |
| C | -6.61645500 | -0.46729900 | 0.95675100  |
| H | -7.46489300 | -0.82336500 | 0.35806300  |
| H | -7.00558200 | -0.21208700 | 1.95066300  |
| H | -6.25557000 | 0.45869900  | 0.50069200  |
| C | -6.06020100 | -2.81147800 | 1.73800600  |
| H | -6.41007200 | -2.60219900 | 2.75718300  |
| H | -6.90150800 | -3.24240800 | 1.17959600  |
| H | -5.27746400 | -3.57505700 | 1.80468800  |
| H | -5.38187300 | -0.88663900 | -1.82834600 |
| H | -2.52209300 | 0.21787700  | 1.71434600  |
| C | -3.58915200 | 0.23781900  | 1.42888900  |
| C | -4.07253200 | 0.58896300  | -1.03894800 |

44

0 imaginary frequency

H = -4871.324728

G = -4871.422088

Esol = -4871.816616

|    |             |             |             |
|----|-------------|-------------|-------------|
| Se | -1.31675600 | 0.54069000  | -1.11609200 |
| N  | 0.25247200  | 1.36230500  | -0.94140800 |
| N  | -1.49897600 | -0.58621800 | 0.37014900  |
| S  | 0.55911700  | 2.10151400  | 0.50704800  |
| O  | 0.24635600  | 1.19859400  | 1.64635100  |
| O  | 0.03268100  | 3.47686500  | 0.59460100  |
| S  | -1.67296200 | -2.22921000 | 0.13016900  |
| O  | -2.29033600 | -2.35090900 | -1.19448900 |
| O  | -2.30573500 | -2.78098200 | 1.32730500  |

|   |             |             |             |
|---|-------------|-------------|-------------|
| C | -0.00776900 | -2.92224500 | 0.04725500  |
| C | 0.21160600  | -4.16416400 | 0.64698600  |
| C | 1.00346400  | -2.25524700 | -0.65051100 |
| C | 1.46663500  | -4.75960800 | 0.54019200  |
| H | -0.58722200 | -4.64840500 | 1.19723400  |
| C | 2.25847100  | -2.84730600 | -0.75660300 |
| H | 0.83228900  | -1.27815200 | -1.08827500 |
| C | 2.46564100  | -4.09047300 | -0.16157900 |
| H | 1.67893300  | -5.72088400 | 0.99128200  |
| H | 3.06932600  | -2.36294800 | -1.28628800 |
| N | 3.79830800  | -4.71708500 | -0.27317600 |
| O | 3.95172300  | -5.81945500 | 0.24772400  |
| O | 4.66747000  | -4.09448200 | -0.87961800 |
| C | 2.35016700  | 2.22636100  | 0.38839300  |
| C | 3.13774300  | 1.13385700  | 0.75865000  |
| C | 2.91648300  | 3.42749700  | -0.03932400 |
| C | 4.52352000  | 1.23762300  | 0.68430100  |
| H | 2.66917000  | 0.22233000  | 1.11262900  |
| C | 4.30315900  | 3.53545100  | -0.11880200 |
| H | 2.27631300  | 4.26386900  | -0.29606400 |
| C | 5.07985300  | 2.43744100  | 0.24270000  |
| H | 5.17285800  | 0.41727500  | 0.96377300  |
| H | 4.78492000  | 4.44810400  | -0.44660400 |
| N | 6.54951800  | 2.55075500  | 0.16315800  |
| O | 7.21364000  | 1.57145600  | 0.49677800  |
| O | 7.01660300  | 3.61710600  | -0.23250300 |
| C | -4.75137500 | 0.01092500  | -0.40823600 |
| C | -4.13355300 | 1.07705600  | -1.30926600 |
| C | -3.04224200 | 2.08216200  | 0.75949200  |
| C | -4.60035800 | 0.17153700  | 1.08851200  |

|   |             |             |             |
|---|-------------|-------------|-------------|
| H | -2.43430600 | 2.88495000  | 1.16645600  |
| H | -3.84294200 | 1.55960300  | 2.62950500  |
| H | -4.44199200 | -0.73675700 | 1.66792400  |
| C | -2.57995300 | 3.08359800  | -1.52077400 |
| H | -2.41782800 | 2.84207500  | -2.57857700 |
| H | -3.42029000 | 3.78694400  | -1.46872100 |
| H | -1.69176700 | 3.58389300  | -1.12859200 |
| H | -3.84067200 | 0.62754500  | -2.26668200 |
| C | -5.98059100 | 0.29990000  | 0.44164300  |
| H | -4.66536100 | -1.00277300 | -0.78942000 |
| C | -6.67455500 | 1.64797200  | 0.37147700  |
| H | -7.31688700 | 1.71133700  | -0.51671700 |
| H | -7.31639300 | 1.78886200  | 1.24977800  |
| H | -5.97281400 | 2.48635800  | 0.34562200  |
| C | -6.93326900 | -0.86352800 | 0.66482400  |
| H | -7.48227600 | -0.74756900 | 1.60789300  |
| H | -7.67176700 | -0.92337900 | -0.14510400 |
| H | -6.39975800 | -1.81947600 | 0.70208300  |
| H | -4.87721000 | 1.84307600  | -1.56642500 |
| H | -1.02671000 | -0.24330400 | 1.21543200  |
| C | -3.81489900 | 1.33065800  | 1.56514800  |
| C | -2.94065600 | 1.84441400  | -0.70126500 |

44a

0 imaginary frequency

H = -585.906027

G = -585.962047

Esol = -586.281016

|   |            |             |            |
|---|------------|-------------|------------|
| C | 1.80224700 | -0.09248100 | 0.21760800 |
|---|------------|-------------|------------|



|   |             |             |             |
|---|-------------|-------------|-------------|
| C | 0.58318600  | 0.75126300  | -0.19286200 |
| C | -0.78412500 | 0.25978800  | 0.37370100  |
| C | -0.93142100 | -1.23330200 | 0.04529900  |
| C | 0.26449400  | -2.10895900 | 0.36107900  |
| C | 1.57370500  | -1.55535800 | -0.22618200 |
| H | 0.74946300  | 1.79325600  | 0.10478600  |
| C | -1.92612700 | 1.07756100  | -0.32071100 |
| C | -2.03426700 | -1.76006500 | -0.50440000 |
| H | 0.38748900  | -2.19701900 | 1.45177700  |
| H | 1.53039000  | -1.58609400 | -1.32349400 |
| C | -3.28885900 | -0.99568300 | -0.82845400 |
| C | -3.29118900 | 0.38591700  | -0.16891600 |
| H | -2.04157300 | -2.82593900 | -0.73680500 |
| H | -3.38565700 | -0.89234000 | -1.92159000 |
| H | -3.53892000 | 0.28547500  | 0.89656000  |
| H | 2.41223700  | -2.19325200 | 0.07827700  |
| H | -4.16861100 | -1.57397800 | -0.51233000 |
| H | -4.07533700 | 1.01539600  | -0.60905500 |
| H | -1.68926300 | 1.07327600  | -1.39611400 |
| H | 0.51095600  | 0.74453400  | -1.28909500 |
| C | -2.01605700 | 2.54731900  | 0.12011800  |
| H | -2.36847900 | 2.64053000  | 1.15382400  |
| H | -1.05608900 | 3.06897900  | 0.04503300  |
| H | -2.73020600 | 3.08376000  | -0.51579200 |
| C | -0.81963100 | 0.45651700  | 1.91076900  |
| C | 3.13712100  | 0.44514700  | -0.28523200 |
| C | 4.35975200  | -0.07503400 | 0.43668800  |
| H | 5.28168500  | 0.33701200  | 0.01504500  |
| H | 4.32641900  | 0.18797900  | 1.50322200  |
| H | 4.42847200  | -1.16955500 | 0.38814900  |

|   |             |             |             |
|---|-------------|-------------|-------------|
| C | 3.25833700  | 1.31812100  | -1.29152300 |
| H | 4.23559200  | 1.66230500  | -1.62153000 |
| H | 2.40490600  | 1.72483200  | -1.82443000 |
| H | -0.11111200 | -0.20145300 | 2.42216600  |
| H | -0.56283600 | 1.48589000  | 2.18452600  |
| H | -1.81255700 | 0.23421000  | 2.31569700  |
| H | 0.08478600  | -3.12569300 | -0.00818300 |
| H | 1.86525600  | -0.09661400 | 1.31745500  |

5'

0 imaginary frequency

H = -1511.639375

G = -1511.715776

Esol = -1511.925254

|   |             |             |             |
|---|-------------|-------------|-------------|
| C | 0.84691500  | 1.55398900  | -1.22998300 |
| O | 0.96341100  | 0.88779300  | -0.06210000 |
| O | 1.36754700  | 1.22153800  | -2.27136400 |
| C | -0.03807100 | 2.77093800  | -1.03878700 |
| H | 0.24505500  | 3.32204600  | -0.13842500 |
| H | 0.04318000  | 3.40884700  | -1.91992000 |
| H | -1.07360300 | 2.43605500  | -0.91763200 |
| I | 1.99186900  | -0.91836100 | -0.20985700 |
| C | 3.71258200  | 0.31886800  | 0.27172000  |
| C | 4.15287200  | 0.38595000  | 1.59540300  |
| C | 4.40162900  | 0.97103600  | -0.75371200 |
| C | 5.31356000  | 1.10470300  | 1.89254800  |
| H | 3.60520700  | -0.11364800 | 2.38923500  |
| C | 5.55810700  | 1.69011400  | -0.44529300 |
| H | 4.03668900  | 0.92969300  | -1.77530900 |

|   |             |             |             |
|---|-------------|-------------|-------------|
| C | 6.01347700  | 1.75530200  | 0.87428200  |
| H | 5.66505200  | 1.15938100  | 2.91915300  |
| H | 6.10215900  | 2.19909000  | -1.23619400 |
| H | 6.91422700  | 2.31549300  | 1.10910800  |
| N | -0.19074800 | -1.42601000 | -0.87227500 |
| S | -1.23926600 | -2.13057400 | 0.17825600  |
| O | -1.76262800 | -3.38433500 | -0.38973600 |
| O | -0.64201700 | -2.10252600 | 1.52090100  |
| C | -2.62982700 | -0.97715700 | 0.23326000  |
| C | -3.80064700 | -1.27763100 | -0.46447000 |
| C | -2.50825800 | 0.20386500  | 0.97387500  |
| C | -4.86726300 | -0.38050200 | -0.43566500 |
| H | -3.87253300 | -2.21206300 | -1.00987800 |
| C | -3.56793800 | 1.10487400  | 1.00451100  |
| H | -1.59612100 | 0.40397900  | 1.52485200  |
| C | -4.73004600 | 0.79805600  | 0.29426400  |
| H | -5.79282400 | -0.57999400 | -0.96132900 |
| H | -3.51614100 | 2.02710600  | 1.56993900  |
| N | -5.85109200 | 1.75231800  | 0.32276600  |
| O | -5.69851800 | 2.79180600  | 0.96403900  |
| O | -6.87019300 | 1.45493200  | -0.29868700 |
| H | -0.21163700 | -1.90594800 | -1.77286000 |

5

0 imaginary frequency

H = -1511.672632

G = -1511.748897

Esol = -1511.959033

|   |             |             |             |
|---|-------------|-------------|-------------|
| C | -4.12812300 | -2.38869400 | -0.19615800 |
|---|-------------|-------------|-------------|

|   |             |             |             |
|---|-------------|-------------|-------------|
| O | -3.24909500 | -1.98057600 | 0.70814700  |
| O | -4.11475200 | -2.08437700 | -1.38150700 |
| C | -5.18782100 | -3.29164000 | 0.41682000  |
| H | -5.72131400 | -2.75399600 | 1.20736300  |
| H | -5.88950000 | -3.61188100 | -0.35502200 |
| H | -4.71456900 | -4.16377200 | 0.87896400  |
| I | -1.51900200 | -0.85986200 | -0.04584700 |
| C | -2.75911300 | 0.91289600  | 0.01092000  |
| C | -2.46768700 | 1.89066400  | 0.95517500  |
| C | -3.79616700 | 1.00839000  | -0.91086700 |
| C | -3.27135700 | 3.03473000  | 0.96497700  |
| H | -1.63739400 | 1.78574400  | 1.64417100  |
| C | -4.58480600 | 2.16235900  | -0.87317200 |
| H | -4.00192000 | 0.20446200  | -1.60798800 |
| C | -4.32327500 | 3.16986600  | 0.05726500  |
| H | -3.06610100 | 3.81717200  | 1.68959200  |
| H | -5.40299000 | 2.26615800  | -1.58008900 |
| H | -4.94068200 | 4.06338800  | 0.07470600  |
| N | 0.21982000  | 0.32280000  | -0.76182500 |
| S | 1.10081200  | 1.33697000  | 0.21258000  |
| O | 1.14153400  | 2.68376200  | -0.37237700 |
| O | 0.65154900  | 1.12255900  | 1.59696400  |
| C | 2.77664000  | 0.67502000  | 0.11326100  |
| C | 3.66696900  | 1.21566900  | -0.81689700 |
| C | 3.15450400  | -0.36340200 | 0.96859700  |
| C | 4.95726300  | 0.69825900  | -0.90754900 |
| H | 3.35506700  | 2.04211400  | -1.44586000 |
| C | 4.44269200  | -0.88367200 | 0.88225600  |
| H | 2.45295900  | -0.74246800 | 1.70345900  |
| C | 5.31977200  | -0.34585400 | -0.05901400 |

|   |            |             |             |
|---|------------|-------------|-------------|
| H | 5.67916200 | 1.09030100  | -1.61307200 |
| H | 4.77713800 | -1.68572200 | 1.52836600  |
| N | 6.68432900 | -0.89690800 | -0.15369100 |
| O | 6.97987900 | -1.81631900 | 0.60760100  |
| O | 7.43982000 | -0.40367600 | -0.98915100 |
| H | 0.08679900 | 0.74989800  | -1.67847200 |

6

0 imaginary frequency

H = -1511.668686

G = -1511.744198

Esol = -1511.953903

|   |             |             |             |
|---|-------------|-------------|-------------|
| C | 1.15394400  | -2.46894000 | 0.52420500  |
| O | 0.68963900  | -2.03784500 | -0.58236500 |
| O | 0.76197300  | -2.11588100 | 1.67228500  |
| C | 2.29989200  | -3.46811200 | 0.42777600  |
| H | 3.20816600  | -2.94192300 | 0.11144100  |
| H | 2.48004400  | -3.93961900 | 1.39581000  |
| H | 2.07994700  | -4.22413300 | -0.33121600 |
| I | -1.54479300 | -0.89587400 | -0.67588800 |
| C | -3.47103400 | 0.02886300  | -0.42713800 |
| C | -4.52604500 | -0.78099400 | -0.00160300 |
| C | -3.66201700 | 1.37638200  | -0.73476300 |
| C | -5.80351600 | -0.22795300 | 0.10854800  |
| H | -4.36304000 | -1.82551600 | 0.24515400  |
| C | -4.94415000 | 1.91657500  | -0.61613100 |
| H | -2.82787200 | 2.00085100  | -1.03104300 |
| C | -6.01122200 | 1.11795900  | -0.19847000 |
| H | -6.63055600 | -0.84885800 | 0.44079200  |

|   |             |             |             |
|---|-------------|-------------|-------------|
| H | -5.10435300 | 2.96591800  | -0.84654500 |
| H | -7.00548000 | 1.54631300  | -0.10888300 |
| N | -0.87609300 | -0.13137100 | 1.17594300  |
| S | -0.07601300 | 1.37392100  | 1.16061300  |
| O | -0.75770900 | 2.24813200  | 0.20171200  |
| O | 0.01425500  | 1.69205600  | 2.58493600  |
| H | -0.21758300 | -0.93840000 | 1.52798400  |
| C | 1.60311200  | 1.12793700  | 0.55846800  |
| C | 1.93185600  | 1.56041800  | -0.72762000 |
| C | 2.54785700  | 0.53834700  | 1.40416900  |
| C | 3.23511100  | 1.39029400  | -1.18937000 |
| H | 1.18077600  | 2.03721300  | -1.34666500 |
| C | 3.84969500  | 0.36399500  | 0.94290000  |
| H | 2.26963800  | 0.21749200  | 2.40092500  |
| C | 4.16751200  | 0.79162900  | -0.34582500 |
| H | 3.53536400  | 1.71313700  | -2.17822900 |
| H | 4.61427900  | -0.08793200 | 1.56220200  |
| N | 5.54884600  | 0.60821700  | -0.83390200 |
| O | 5.80770900  | 1.00734200  | -1.96745700 |
| O | 6.35109000  | 0.06716200  | -0.07593800 |

7

0 imaginary frequency

H = -1511.670943

G = -1511.747684

Esol = -1511.957439

|   |             |            |             |
|---|-------------|------------|-------------|
| C | -0.37089000 | 3.78134000 | -0.55879200 |
| O | -1.48786600 | 3.42853200 | -0.19783300 |
| O | 0.59070500  | 2.93819100 | -0.92723300 |

|   |             |             |             |
|---|-------------|-------------|-------------|
| C | 0.06012000  | 5.22589600  | -0.62735100 |
| H | -0.80403800 | 5.87824400  | -0.49766100 |
| H | 0.78609000  | 5.42215800  | 0.16985100  |
| H | 0.55564600  | 5.43106700  | -1.58098400 |
| I | -2.35269100 | 0.70133200  | -0.06915100 |
| C | -3.05637500 | -1.31746600 | -0.29225800 |
| C | -3.76340100 | -1.62739300 | -1.45428700 |
| C | -2.82929200 | -2.25474600 | 0.71403700  |
| C | -4.27632700 | -2.91842900 | -1.60143500 |
| H | -3.91509700 | -0.88740600 | -2.23358100 |
| C | -3.34201100 | -3.54311700 | 0.54316800  |
| H | -2.24480000 | -1.99841700 | 1.59027300  |
| C | -4.06540400 | -3.87317300 | -0.60514400 |
| H | -4.83097800 | -3.17464000 | -2.49955900 |
| H | -3.17150600 | -4.28843900 | 1.31478400  |
| H | -4.46166500 | -4.87736800 | -0.72586500 |
| N | -0.27803900 | 0.39166900  | -0.21337200 |
| S | 0.38183900  | 0.14354800  | 1.31466900  |
| O | 0.52576700  | 1.37814300  | 2.10423800  |
| O | -0.19662400 | -1.03551600 | 1.99297400  |
| H | 0.28044600  | 1.99375300  | -0.75583500 |
| C | 2.00785400  | -0.30865000 | 0.67485400  |
| C | 2.92879400  | 0.70068200  | 0.38197300  |
| C | 2.32186700  | -1.66075100 | 0.52051000  |
| C | 4.19257900  | 0.34938600  | -0.08611500 |
| H | 2.65690400  | 1.74145600  | 0.51747200  |
| C | 3.58625400  | -2.01570300 | 0.05867000  |
| H | 1.58542900  | -2.41539400 | 0.77230900  |
| C | 4.49676000  | -1.00240000 | -0.23886500 |
| H | 4.93732000  | 1.09699800  | -0.32853400 |

|   |            |             |             |
|---|------------|-------------|-------------|
| H | 3.87565600 | -3.05086200 | -0.07212200 |
| N | 5.83587700 | -1.37641900 | -0.73241300 |
| O | 6.08057600 | -2.57490300 | -0.85990800 |
| O | 6.62316300 | -0.46671300 | -0.98643100 |

8

0 imaginary frequency

H = -1282.540193

G = -1282.605165

Esol = -1282.756963

|   |             |             |             |
|---|-------------|-------------|-------------|
| I | 2.21803800  | -1.29560800 | -0.53091100 |
| C | 3.32957900  | 0.54600100  | -0.21981200 |
| C | 4.32212300  | 0.86402900  | -1.14279600 |
| C | 3.02460800  | 1.34023300  | 0.88026000  |
| C | 5.06474900  | 2.02927500  | -0.93170000 |
| H | 4.51961700  | 0.23523300  | -2.00498400 |
| C | 3.77361400  | 2.50721700  | 1.06105200  |
| H | 2.22194200  | 1.07438200  | 1.56155800  |
| C | 4.79000500  | 2.84738800  | 0.16572900  |
| H | 5.84758000  | 2.29732500  | -1.63545800 |
| H | 3.55573400  | 3.14810000  | 1.91058600  |
| H | 5.36605600  | 3.75520000  | 0.31992000  |
| N | 0.20431400  | -0.71921000 | -0.54733800 |
| S | -0.40381100 | -0.79739000 | 1.01324400  |
| O | -0.50438000 | -2.16450700 | 1.55733600  |
| O | 0.16086000  | 0.23815500  | 1.91051800  |
| C | -2.05024200 | -0.26319900 | 0.50183500  |
| C | -3.02069700 | -1.23152300 | 0.23680900  |
| C | -2.32909600 | 1.10275300  | 0.41449400  |



|   |             |             |             |
|---|-------------|-------------|-------------|
| C | -4.30095700 | -0.82646600 | -0.13253900 |
| H | -2.77124800 | -2.28223400 | 0.33326900  |
| C | -3.60700100 | 1.51262600  | 0.04485600  |
| H | -1.55584600 | 1.82678600  | 0.64477000  |
| C | -4.56810000 | 0.53869300  | -0.22462700 |
| H | -5.08574900 | -1.54139200 | -0.34562700 |
| H | -3.86934900 | 2.56006100  | -0.03519000 |
| N | -5.92260100 | 0.97070500  | -0.61813000 |
| O | -6.13537500 | 2.17985500  | -0.69138500 |
| O | -6.75451300 | 0.09517300  | -0.84966400 |

9

0 imaginary frequency

H = -4488.196385

G = -4488.289058

Esol = -4488.827181

|    |            |             |             |
|----|------------|-------------|-------------|
| Se | 0.00546600 | 0.03401500  | -1.40207000 |
| N  | 0.51408500 | 1.79387700  | -1.15277700 |
| S  | 1.42024000 | 2.03533400  | 0.18513400  |
| O  | 1.76138700 | 3.46540000  | 0.21117400  |
| O  | 0.82792100 | 1.44738600  | 1.42210200  |
| C  | 2.97686300 | 1.12469600  | -0.04666100 |
| C  | 3.59184000 | 0.51955700  | 1.05142600  |
| C  | 3.56992900 | 1.08821300  | -1.31228800 |
| C  | 4.81091300 | -0.13405100 | 0.88832300  |
| H  | 3.10734700 | 0.55946600  | 2.02068800  |
| C  | 4.78771500 | 0.43799000  | -1.48568500 |
| H  | 3.07136000 | 1.56153600  | -2.15179000 |
| C  | 5.38786700 | -0.16490100 | -0.38000100 |

|   |             |             |             |
|---|-------------|-------------|-------------|
| H | 5.31523600  | -0.61573700 | 1.71691000  |
| H | 5.27429300  | 0.38771200  | -2.45186200 |
| N | 6.67047000  | -0.86313200 | -0.56010000 |
| O | 7.16065800  | -0.87908000 | -1.68926900 |
| O | 7.17818500  | -1.39325700 | 0.42852700  |
| P | -1.71604900 | -0.24121000 | 0.06295300  |
| C | -3.76072800 | -3.10219400 | -3.09215900 |
| C | -4.51341200 | -1.82287500 | -2.70911100 |
| C | -3.60598200 | -0.80534100 | -1.99627800 |
| C | -2.90617300 | -1.42396200 | -0.76537200 |
| C | -2.16536100 | -2.73060100 | -1.15154900 |
| C | -3.09705200 | -3.72727700 | -1.85976700 |
| H | -2.99043100 | -2.86424700 | -3.83969100 |
| H | -4.44415400 | -3.81983400 | -3.56180900 |
| H | -5.35495700 | -2.08124400 | -2.04948900 |
| H | -2.83900400 | -0.43288900 | -2.68771400 |
| H | -3.66622200 | -1.66286000 | -0.00760500 |
| H | -1.32693900 | -2.48504900 | -1.81838700 |
| H | -1.73106900 | -3.20221000 | -0.26462200 |
| H | -3.87296000 | -4.06101000 | -1.15524100 |
| H | -2.52345700 | -4.61945900 | -2.13864100 |
| H | -4.94898900 | -1.35080600 | -3.59801300 |
| H | -4.20734100 | 0.05671900  | -1.69466500 |
| C | -4.16571900 | 3.82448800  | 0.57511500  |
| C | -2.97331000 | 3.76948800  | -0.39031400 |
| C | -2.66693700 | 2.32712100  | -0.82428000 |
| C | -2.39388200 | 1.45729100  | 0.42436000  |
| C | -3.59939400 | 1.46896600  | 1.38919300  |
| C | -3.94130000 | 2.91681300  | 1.79257600  |
| H | -5.07618600 | 3.50425300  | 0.04635200  |

|   |             |             |             |
|---|-------------|-------------|-------------|
| H | -4.34386700 | 4.85481800  | 0.90660800  |
| H | -2.08145700 | 4.19756500  | 0.08693900  |
| H | -3.52968800 | 1.93617500  | -1.37597800 |
| H | -1.52782300 | 1.89228800  | 0.94297200  |
| H | -4.47114700 | 1.00607100  | 0.90409400  |
| H | -3.38911700 | 0.88896300  | 2.29410200  |
| H | -3.11421200 | 3.31651400  | 2.39564600  |
| H | -4.82800300 | 2.91180600  | 2.43898700  |
| H | -3.17432200 | 4.37892300  | -1.27969400 |
| H | -1.79956400 | 2.30533700  | -1.48691400 |
| C | -0.41442500 | -2.95892500 | 3.77454900  |
| C | -1.73270100 | -2.17548000 | 3.84736100  |
| C | -2.24051300 | -1.77861200 | 2.44825100  |
| C | -1.15488100 | -0.97585900 | 1.69589100  |
| C | 0.14545500  | -1.80322600 | 1.57831100  |
| C | 0.64998300  | -2.19238700 | 2.97598200  |
| H | -0.59852700 | -3.93102100 | 3.29335000  |
| H | -0.05023300 | -3.17622000 | 4.78611000  |
| H | -1.58520000 | -1.26477400 | 4.44502500  |
| H | -2.48364900 | -2.69058000 | 1.88621400  |
| H | -0.90486500 | -0.07551800 | 2.27083200  |
| H | -0.04399700 | -2.71637500 | 0.99706000  |
| H | 0.90162500  | -1.23396600 | 1.03548500  |
| H | 0.93234800  | -1.27875500 | 3.51771800  |
| H | 1.56116400  | -2.79566400 | 2.88048500  |
| H | -2.50239800 | -2.76592700 | 4.35998800  |
| H | -3.17239400 | -1.21010100 | 2.54309300  |

HOAc

0 imaginary frequency

H = -229.113185

G = -229.145579

Esol = -229.180729

|   |             |             |             |
|---|-------------|-------------|-------------|
| H | -1.72377500 | -0.80229300 | 0.00003100  |
| O | -0.77913100 | -1.04652400 | -0.00001100 |
| C | -0.09225200 | 0.12591100  | 0.00002100  |
| O | -0.64494600 | 1.20235700  | -0.00000500 |
| C | 1.39728100  | -0.11041700 | 0.00001100  |
| H | 1.91785300  | 0.84735600  | 0.00033300  |
| H | 1.68415500  | -0.69268300 | 0.88183100  |
| H | 1.68421400  | -0.69200300 | -0.88225300 |

IMe

0 imaginary frequency

H = -304.787958

G = -304.826819

Esol = -304.922906

|   |             |             |             |
|---|-------------|-------------|-------------|
| C | -0.00001100 | -0.98812200 | -0.00009200 |
| C | -0.67825200 | 1.21832200  | 0.00002000  |
| C | 0.67830300  | 1.21831700  | 0.00004800  |
| H | -1.38340500 | 2.03698600  | 0.00018400  |
| H | 1.38350400  | 2.03694600  | -0.00029200 |
| N | -1.06266400 | -0.11928400 | -0.00009600 |
| N | 1.06265200  | -0.11930500 | -0.00012100 |
| C | -2.44185100 | -0.57397100 | 0.00006500  |
| H | -2.42331600 | -1.66416000 | 0.00017500  |
| H | -2.97283600 | -0.21959700 | 0.89121800  |
| H | -2.97301100 | -0.21976200 | -0.89104900 |

|   |            |             |             |
|---|------------|-------------|-------------|
| C | 2.44182700 | -0.57399200 | 0.00009100  |
| H | 2.97292800 | -0.21921200 | 0.89101600  |
| H | 2.42326600 | -1.66418200 | 0.00074900  |
| H | 2.97286500 | -0.22023000 | -0.89126700 |

NsNH2

0 imaginary frequency

H = -1040.806527

G = -1040.856638

Esol = -1040.949225

|   |             |             |             |
|---|-------------|-------------|-------------|
| N | -2.95330300 | -0.00041900 | 1.50489500  |
| S | -2.52701600 | 0.00007300  | -0.13377800 |
| O | -2.94589100 | -1.28594200 | -0.69512100 |
| O | -2.94580300 | 1.28618500  | -0.69493100 |
| H | -3.48255700 | 0.84131500  | 1.72338000  |
| H | -3.48471000 | -0.84114500 | 1.72205400  |
| C | -0.72720000 | 0.00004900  | -0.08242300 |
| C | -0.04784300 | 1.21976700  | -0.07160700 |
| C | -0.04791200 | -1.21971900 | -0.07157500 |
| C | 1.34395100  | 1.22181300  | -0.02931600 |
| H | -0.60249900 | 2.15059600  | -0.11207200 |
| C | 1.34387800  | -1.22184100 | -0.02929200 |
| H | -0.60262400 | -2.15051400 | -0.11200800 |
| C | 2.01306800  | -0.00003100 | -0.00411000 |
| H | 1.91128600  | 2.14406100  | -0.02107700 |
| H | 1.91113200  | -2.14413500 | -0.02103600 |
| N | 3.48872600  | -0.00003400 | 0.04242700  |
| O | 4.05629100  | -1.09039400 | 0.06108200  |
| O | 4.05622800  | 1.09035200  | 0.06145600  |

OIMe

0 imaginary frequency

H = -380.093676

G = -380.135393

Esol = -380.234814

|   |             |             |             |
|---|-------------|-------------|-------------|
| C | 0.00001100  | -0.66778000 | -0.00009100 |
| C | -0.67612000 | 1.51429500  | 0.00005200  |
| C | 0.67616600  | 1.51428200  | -0.00008900 |
| H | -1.37585600 | 2.33567900  | 0.00031300  |
| H | 1.37595900  | 2.33561300  | -0.00039500 |
| N | -1.10009200 | 0.18577000  | 0.00039900  |
| N | 1.10006900  | 0.18569700  | -0.00040300 |
| C | -2.46250800 | -0.30170200 | -0.00009800 |
| H | -3.00393800 | 0.03564100  | 0.89140300  |
| H | -3.00242300 | 0.03275000  | -0.89362800 |
| H | -2.41148600 | -1.39222600 | 0.00166400  |
| C | 2.46250700  | -0.30173000 | 0.00018600  |
| H | 3.00328200  | 0.03338700  | -0.89256500 |
| H | 3.00301200  | 0.03506500  | 0.89246000  |
| H | 2.41160100  | -1.39226500 | 0.00114600  |
| O | -0.00004000 | -1.89601300 | -0.00001600 |

OPCy3

0 imaginary frequency

H = -1122.295179

G = -1122.362019

Esol = -1122.807067

|   |             |             |             |
|---|-------------|-------------|-------------|
| O | -0.00008600 | 0.12547800  | 2.26257000  |
| P | 0.00002800  | -0.11397500 | 0.77127400  |
| C | 0.00026800  | 4.47866000  | -0.27438300 |
| C | -1.26212300 | 3.66939900  | -0.59626100 |
| C | -1.26579600 | 2.30878500  | 0.12017700  |
| C | 0.00006600  | 1.47798700  | -0.19880700 |
| C | 1.26622100  | 2.30857800  | 0.11947800  |
| C | 1.26235700  | 3.66920300  | -0.59695100 |
| H | 0.00058200  | 4.74093400  | 0.79358600  |
| H | 0.00018700  | 5.42475000  | -0.83060400 |
| H | -1.32189300 | 3.50772500  | -1.68312300 |
| H | -1.31652800 | 2.46242100  | 1.20606200  |
| H | -0.00024700 | 1.22522300  | -1.26987400 |
| H | 1.31759900  | 2.46220800  | 1.20533600  |
| H | 2.16987100  | 1.75680900  | -0.16097100 |
| H | 1.32150100  | 3.50751200  | -1.68384500 |
| H | 2.16127900  | 4.23324500  | -0.31673600 |
| H | -2.16080100 | 4.23358400  | -0.31554800 |
| H | -2.16968400 | 1.75713700  | -0.15974300 |
| C | -4.24276300 | -1.84553800 | -0.59444200 |
| C | -3.81634900 | -1.89748600 | 0.88031000  |
| C | -2.68455000 | -0.90159700 | 1.17863400  |
| C | -1.47618700 | -1.14351300 | 0.24607100  |
| C | -1.90169400 | -1.07355700 | -1.23644200 |
| C | -3.04481800 | -2.06233900 | -1.53043000 |
| H | -4.69291400 | -0.86407200 | -0.80588200 |
| H | -5.01955100 | -2.59423800 | -0.79565100 |
| H | -3.47780200 | -2.91545600 | 1.12488200  |
| H | -3.06232400 | 0.12025700  | 1.04084700  |
| H | -1.13335200 | -2.17288600 | 0.43917100  |

|   |             |             |             |
|---|-------------|-------------|-------------|
| H | -2.24020200 | -0.05697800 | -1.47811800 |
| H | -1.05666000 | -1.28672100 | -1.90151600 |
| H | -2.67012200 | -3.08934200 | -1.40792200 |
| H | -3.35631400 | -1.96724800 | -2.57871200 |
| H | -4.67496700 | -1.69070100 | 1.53189500  |
| H | -2.36126100 | -0.97186400 | 2.22130700  |
| C | 4.24247000  | -1.84594000 | -0.59471500 |
| C | 3.04419800  | -2.06354500 | -1.53010400 |
| C | 1.90105800  | -1.07472800 | -1.23633700 |
| C | 1.47618400  | -1.14364300 | 0.24642400  |
| C | 2.68487100  | -0.90100500 | 1.17837000  |
| C | 3.81665100  | -1.89698000 | 0.88023000  |
| H | 4.69238300  | -0.86454400 | -0.80698900 |
| H | 5.01930200  | -2.59465000 | -0.79572300 |
| H | 2.66970000  | -3.09052100 | -1.40676100 |
| H | 2.23928300  | -0.05826700 | -1.47892800 |
| H | 1.13351700  | -2.17291200 | 0.44039100  |
| H | 3.06250700  | 0.12079200  | 1.03983400  |
| H | 2.36197300  | -0.97068700 | 2.22120600  |
| H | 3.47828900  | -2.91481900 | 1.12559900  |
| H | 3.35529500  | -1.96912300 | -2.57856500 |
| H | 1.05574200  | -1.28853900 | -1.90084000 |
| H | 4.67551200  | -1.68969200 | 1.53133400  |

P

0 imaginary frequency

H = -1196.786917

G = -1196.846795

Esol = -1197.024617



|   |             |             |             |
|---|-------------|-------------|-------------|
| N | -2.17154600 | 0.22107700  | 0.95640200  |
| S | -1.39540600 | 1.16077600  | -0.20543400 |
| O | -1.43520100 | 2.55720300  | 0.24239400  |
| O | -1.87870100 | 0.76635800  | -1.53229500 |
| C | -2.83914900 | -3.07316500 | 0.06837000  |
| C | -2.93956700 | -1.79604700 | -0.30259900 |
| C | -3.32462700 | -0.68079300 | 0.64219600  |
| H | -2.78493800 | -1.51117800 | -1.34039700 |
| H | -3.53980100 | -1.13575300 | 1.61658600  |
| H | -2.60138500 | -3.85651600 | -0.64649700 |
| H | -2.99775900 | -3.38922200 | 1.09781200  |
| C | -4.57308700 | 0.07550900  | 0.16089600  |
| H | -4.84842700 | 0.86319900  | 0.87188300  |
| H | -4.39552000 | 0.53610000  | -0.81462900 |
| H | -5.41846300 | -0.61556900 | 0.07237700  |
| C | 0.32309400  | 0.62544200  | -0.07502900 |
| C | 0.64465800  | -0.72872000 | -0.20550600 |
| C | 1.30794200  | 1.59819400  | 0.09879500  |
| C | 1.97877600  | -1.11783400 | -0.15595300 |
| H | -0.13784100 | -1.47084100 | -0.32598000 |
| C | 2.64675300  | 1.21241400  | 0.14659800  |
| H | 1.02334600  | 2.63940300  | 0.19947500  |
| C | 2.95680200  | -0.13829700 | 0.01805000  |
| H | 2.27170900  | -2.15625200 | -0.24730200 |
| H | 3.44156800  | 1.93529000  | 0.28176600  |
| N | 4.37219700  | -0.55099400 | 0.07262300  |
| O | 4.61947300  | -1.75036300 | -0.04131100 |
| O | 5.21618600  | 0.32941500  | 0.22901600  |
| H | -2.35419200 | 0.81722900  | 1.76131800  |

PCy3

0 imaginary frequency

H = -1047.005011

G = -1047.070237

Esol = -1047.510891

|   |             |             |             |
|---|-------------|-------------|-------------|
| P | 0.00001600  | -0.12172600 | -1.02245700 |
| C | -0.00007200 | 4.46262100  | 0.18607000  |
| C | 1.26346600  | 3.64153700  | 0.47408400  |
| C | 1.25980100  | 2.30563000  | -0.28894900 |
| C | -0.00001900 | 1.46304000  | 0.01533600  |
| C | -1.25977300 | 2.30562900  | -0.28928000 |
| C | -1.26366400 | 3.64151500  | 0.47378300  |
| H | 0.00004700  | 4.76797600  | -0.87080700 |
| H | -0.00014300 | 5.38650600  | 0.77876400  |
| H | 1.32742800  | 3.44095100  | 1.55399700  |
| H | 1.30194400  | 2.50529900  | -1.36977200 |
| H | -0.00016100 | 1.21315000  | 1.08604300  |
| H | -1.30160900 | 2.50532200  | -1.37011100 |
| H | -2.16938000 | 1.74733900  | -0.04370300 |
| H | -1.32787400 | 3.44090300  | 1.55367700  |
| H | -2.16133800 | 4.21594300  | 0.21007100  |
| H | 2.16119200  | 4.21597800  | 0.21056900  |
| H | 2.16934700  | 1.74736800  | -0.04308600 |
| C | 4.24113300  | -1.79082300 | 0.55428300  |
| C | 3.84060400  | -1.92845400 | -0.92130100 |
| C | 2.69988500  | -0.96615600 | -1.29231900 |
| C | 1.47111400  | -1.14484700 | -0.36992400 |
| C | 1.88306100  | -1.00872700 | 1.11092100  |
| C | 3.02678900  | -1.97379500 | 1.47503600  |

|   |             |             |             |
|---|-------------|-------------|-------------|
| H | 4.67424900  | -0.79304000 | 0.72068900  |
| H | 5.02442300  | -2.51683100 | 0.80773800  |
| H | 3.51592100  | -2.96244600 | -1.11213500 |
| H | 3.06818200  | 0.06721900  | -1.22465500 |
| H | 1.12088400  | -2.17940500 | -0.51662600 |
| H | 2.21295200  | 0.01928700  | 1.31265900  |
| H | 1.02814600  | -1.19368600 | 1.77012100  |
| H | 2.66402100  | -3.00934600 | 1.39317800  |
| H | 3.31688700  | -1.82787800 | 2.52400000  |
| H | 4.70730100  | -1.74974800 | -1.57108200 |
| H | 2.40262000  | -1.11641900 | -2.33700800 |
| C | -4.24114300 | -1.79086700 | 0.55420100  |
| C | -3.02689800 | -1.97360400 | 1.47511400  |
| C | -1.88315500 | -1.00854100 | 1.11095200  |
| C | -1.47102100 | -1.14490400 | -0.36977400 |
| C | -2.69972200 | -0.96645200 | -1.29237300 |
| C | -3.84041300 | -1.92874600 | -0.92131200 |
| H | -4.67434900 | -0.79308200 | 0.72036200  |
| H | -5.02441400 | -2.51688400 | 0.80768400  |
| H | -2.66406500 | -3.00915100 | 1.39348700  |
| H | -2.21313300 | 0.01948400  | 1.31249000  |
| H | -1.12068600 | -2.17944800 | -0.51629400 |
| H | -3.06805400 | 0.06692400  | -1.22493200 |
| H | -2.40229800 | -1.11689200 | -2.33698700 |
| H | -3.51563000 | -2.96275100 | -1.11190300 |
| H | -4.70705000 | -1.75024300 | -1.57123200 |
| H | -3.31708000 | -1.82748900 | 2.52402600  |
| H | -1.02834700 | -1.19335900 | 1.77033900  |

PhI

0 imaginary frequency

H = -243.024351

G = -243.062953

Esol = -243.121488

|   |             |             |             |
|---|-------------|-------------|-------------|
| I | -1.56710000 | 0.00000600  | -0.00001600 |
| C | 0.58139700  | 0.00010800  | 0.00017100  |
| C | 1.26401000  | -1.21572600 | 0.00007000  |
| C | 1.26396800  | 1.21564700  | 0.00005900  |
| C | 2.66140500  | -1.20731500 | -0.00000800 |
| H | 0.72229200  | -2.15522000 | 0.00006700  |
| C | 2.66164500  | 1.20719800  | 0.00001600  |
| H | 0.72247900  | 2.15527400  | -0.00019100 |
| C | 3.36184500  | 0.00004400  | -0.00004900 |
| H | 3.19885300  | -2.15181900 | -0.00031900 |
| H | 3.19892500  | 2.15180800  | -0.00010100 |
| H | 4.44812900  | -0.00007500 | -0.00014300 |

S1

0 imaginary frequency

H = -4645.333412

G = -4645.437403

Esol = -4646.080188

|    |             |            |             |
|----|-------------|------------|-------------|
| Se | -2.20104600 | 0.10147100 | 0.37547700  |
| N  | -2.67119500 | 1.19409200 | -0.97216200 |
| S  | -2.59824700 | 2.81158800 | -0.61158600 |
| O  | -3.33074700 | 3.15041300 | 0.62960600  |
| O  | -2.91921500 | 3.51762400 | -1.85458900 |
| C  | -3.69388600 | 0.33919200 | 1.84382400  |

|   |             |             |             |
|---|-------------|-------------|-------------|
| C | -4.09177600 | -0.72028700 | 0.95360500  |
| C | -5.11246800 | -0.56703700 | -0.14111900 |
| H | -3.88532000 | -1.74094500 | 1.27576400  |
| H | -6.09886400 | -0.76133800 | 0.30741400  |
| H | -5.11896700 | 0.46905300  | -0.49335700 |
| H | -3.27763300 | 0.09647600  | 2.81788100  |
| H | -4.08615100 | 1.34497100  | 1.71806000  |
| C | -4.86073900 | -1.52327400 | -1.31101700 |
| H | -4.89843100 | -2.57049700 | -0.98682300 |
| H | -5.61012800 | -1.38458700 | -2.09549900 |
| H | -3.87245300 | -1.32986300 | -1.73894000 |
| C | -0.85217900 | 3.10616700  | -0.25195500 |
| C | 0.02395500  | 3.34665000  | -1.31302000 |
| C | -0.38718600 | 2.97712500  | 1.05978200  |
| C | 1.39047800  | 3.42965800  | -1.06828900 |
| H | -0.37116500 | 3.46352700  | -2.31627300 |
| C | 0.97975200  | 3.05278900  | 1.31148400  |
| H | -1.09327800 | 2.83820700  | 1.87051400  |
| C | 1.84604600  | 3.25845800  | 0.23930000  |
| H | 2.10172900  | 3.60606600  | -1.86546000 |
| H | 1.38125200  | 2.94734100  | 2.31152600  |
| N | 3.29350400  | 3.26460000  | 0.49053600  |
| O | 4.04278100  | 3.43250000  | -0.47282700 |
| O | 3.67853500  | 3.07583600  | 1.64549000  |
| P | 1.04217300  | -1.08303300 | 0.03735700  |
| C | -0.91296800 | -2.98244400 | 3.96988900  |
| C | 0.26351500  | -2.00605600 | 4.09727200  |
| C | 0.50048900  | -1.23627900 | 2.78882500  |
| C | 0.71468200  | -2.17478100 | 1.57534600  |
| C | -0.48309700 | -3.14192400 | 1.46147300  |

|   |             |             |             |
|---|-------------|-------------|-------------|
| C | -0.72362800 | -3.91810900 | 2.76863000  |
| H | -1.84601900 | -2.41080000 | 3.84150500  |
| H | -1.03281700 | -3.56469300 | 4.89214500  |
| H | 1.17320400  | -2.56747600 | 4.35606200  |
| H | -0.36700600 | -0.59295000 | 2.57494800  |
| H | 1.61139700  | -2.78459200 | 1.76062600  |
| H | -1.38998900 | -2.57020900 | 1.21043900  |
| H | -0.33229700 | -3.85513600 | 0.64433900  |
| H | 0.13846600  | -4.57467400 | 2.95595800  |
| H | -1.59471800 | -4.57674500 | 2.65406800  |
| H | 0.08979200  | -1.30148700 | 4.92097600  |
| H | 1.35183300  | -0.55642400 | 2.90467400  |
| C | 5.66068200  | -0.00020500 | -0.20558100 |
| C | 4.96853100  | -0.50054300 | -1.48002500 |
| C | 3.43626100  | -0.44888900 | -1.35101100 |
| C | 2.92557700  | -1.23235300 | -0.12122400 |
| C | 3.63806000  | -0.72964100 | 1.15491200  |
| C | 5.17015800  | -0.78114800 | 1.02030300  |
| H | 5.44547200  | 1.06877100  | -0.06875500 |
| H | 6.75006600  | -0.09114800 | -0.30321300 |
| H | 5.28024400  | -1.53638900 | -1.68252700 |
| H | 3.12001300  | 0.60032900  | -1.26558600 |
| H | 3.18209700  | -2.29433700 | -0.25303700 |
| H | 3.33450800  | 0.30624800  | 1.36321300  |
| H | 3.33608900  | -1.32561900 | 2.02398100  |
| H | 5.49005700  | -1.83079500 | 0.93607100  |
| H | 5.62989700  | -0.38576100 | 1.93486300  |
| H | 5.28349500  | 0.09555300  | -2.34591200 |
| H | 2.98055400  | -0.83510600 | -2.26979400 |
| C | 0.08891100  | -3.18699800 | -4.16889800 |

|   |             |             |             |
|---|-------------|-------------|-------------|
| C | -0.72059000 | -1.96413200 | -3.71392800 |
| C | -0.00389700 | -1.18444800 | -2.59869500 |
| C | 0.35225400  | -2.10369100 | -1.40658400 |
| C | 1.15739400  | -3.33361800 | -1.86636400 |
| C | 0.42854900  | -4.10211900 | -2.98352400 |
| H | 1.02249700  | -2.84791000 | -4.64223500 |
| H | -0.46280600 | -3.74681500 | -4.93492000 |
| H | -1.70230000 | -2.29811600 | -3.34429500 |
| H | 0.90497000  | -0.72300900 | -3.00790600 |
| H | -0.61148300 | -2.46352400 | -1.01851100 |
| H | 2.13828900  | -3.01336900 | -2.24248300 |
| H | 1.35601500  | -4.00419000 | -1.01995100 |
| H | -0.50093200 | -4.53162900 | -2.58020700 |
| H | 1.04345000  | -4.94838400 | -3.31684700 |
| H | -0.92088600 | -1.29915300 | -4.56340700 |
| H | -0.64109200 | -0.36302000 | -2.25080300 |

S10

0 imaginary frequency

H = -4563.435156

G = -4563.529990

Esol = -4564.070936

|    |            |             |             |
|----|------------|-------------|-------------|
| Se | 0.15815200 | -0.34349900 | -2.22140700 |
| N  | 1.35036000 | 0.31652500  | -1.11398600 |
| S  | 1.88752400 | -0.71705400 | 0.11612900  |
| O  | 1.39022000 | -0.19232900 | 1.41145100  |
| O  | 1.71662900 | -2.15863600 | -0.14785700 |
| C  | 3.65358800 | -0.36172500 | 0.05221800  |
| C  | 4.12967400 | 0.84827300  | 0.56328000  |

|   |             |             |             |
|---|-------------|-------------|-------------|
| C | 4.51424000  | -1.31178900 | -0.49908600 |
| C | 5.49317500  | 1.12047800  | 0.51196000  |
| H | 3.43970300  | 1.55976100  | 1.00247500  |
| C | 5.88088400  | -1.04666100 | -0.54924300 |
| H | 4.11152500  | -2.24709900 | -0.87161800 |
| C | 6.34445100  | 0.16682200  | -0.04555800 |
| H | 5.90426200  | 2.04585700  | 0.89553600  |
| H | 6.58369100  | -1.75767400 | -0.96525200 |
| N | 7.78998900  | 0.45139900  | -0.09865100 |
| O | 8.52247900  | -0.40437500 | -0.59315000 |
| O | 8.17655900  | 1.52805000  | 0.35430400  |
| O | -1.82288300 | -0.01535600 | -1.55283900 |
| P | -2.30638800 | 0.10616900  | -0.06807500 |
| C | -6.73518400 | 0.58453400  | -1.62911900 |
| C | -6.06645100 | 1.79451100  | -0.96576100 |
| C | -4.53959800 | 1.63065800  | -0.88000500 |
| C | -4.14658600 | 0.32463200  | -0.14865700 |
| C | -4.82875400 | -0.89250100 | -0.81949700 |
| C | -6.35356000 | -0.71217000 | -0.90507400 |
| H | -6.41584000 | 0.52249800  | -2.67945500 |
| H | -7.82496300 | 0.70926500  | -1.63871300 |
| H | -6.47412900 | 1.92580400  | 0.04756400  |
| H | -4.11210700 | 1.61220300  | -1.89057600 |
| H | -4.48473000 | 0.38918100  | 0.89662300  |
| H | -4.41378000 | -1.01658600 | -1.82774400 |
| H | -4.60370100 | -1.81193400 | -0.27055300 |
| H | -6.77505100 | -0.69991700 | 0.11100700  |
| H | -6.79176300 | -1.57991800 | -1.41338900 |
| H | -6.30049100 | 2.71364800  | -1.51695600 |
| H | -4.11210800 | 2.50011200  | -0.37144600 |



|   |             |             |             |
|---|-------------|-------------|-------------|
| C | -0.98998200 | 4.32679000  | 1.67669500  |
| C | -0.29941100 | 3.76798400  | 0.42437400  |
| C | -1.14914900 | 2.68647900  | -0.26057600 |
| C | -1.47962900 | 1.55509700  | 0.74435700  |
| C | -2.20061900 | 2.10787300  | 1.99496700  |
| C | -1.35243300 | 3.20627400  | 2.66171900  |
| H | -1.90622200 | 4.85897400  | 1.37948700  |
| H | -0.34686000 | 5.06629000  | 2.16992700  |
| H | 0.67135300  | 3.33347000  | 0.69996500  |
| H | -2.07222700 | 3.14122000  | -0.64231500 |
| H | -0.51980300 | 1.13023500  | 1.07142800  |
| H | -3.17635500 | 2.52778800  | 1.71375600  |
| H | -2.39633900 | 1.31198400  | 2.72261700  |
| H | -0.43122100 | 2.75295200  | 3.05345200  |
| H | -1.89499700 | 3.61373800  | 3.52412600  |
| H | -0.09118300 | 4.57506200  | -0.28895300 |
| H | -0.61516600 | 2.27459400  | -1.12002900 |
| C | -2.09278900 | -4.11596400 | 2.10890200  |
| C | -2.20827500 | -2.84985600 | 2.96924000  |
| C | -2.74600700 | -1.65687400 | 2.15882700  |
| C | -1.86157900 | -1.40802800 | 0.91409700  |
| C | -1.76654800 | -2.67884300 | 0.03191800  |
| C | -1.24060800 | -3.86404200 | 0.85717100  |
| H | -3.10034600 | -4.44117800 | 1.80773700  |
| H | -1.66599000 | -4.93424700 | 2.70216900  |
| H | -1.21914500 | -2.58987300 | 3.37112100  |
| H | -3.77845500 | -1.87063000 | 1.84977500  |
| H | -0.84627200 | -1.18489900 | 1.27021100  |
| H | -2.75351800 | -2.92885400 | -0.37880100 |
| H | -1.10029900 | -2.49150900 | -0.81405300 |

|   |             |             |            |
|---|-------------|-------------|------------|
| H | -0.20155600 | -3.65789700 | 1.14316600 |
| H | -2.86287600 | -3.02851900 | 3.83180900 |
| H | -2.78570000 | -0.76962300 | 2.80143400 |
| H | -1.21866600 | -4.76100600 | 0.22564600 |

S11

0 imaginary frequency

H = -5846.001267

G = -5846.135282

Esol = -5846.855624

|    |             |             |             |
|----|-------------|-------------|-------------|
| Se | -0.63244300 | -0.91356700 | -0.19801700 |
| N  | 0.14024200  | -1.60678800 | -1.61227700 |
| S  | 0.42275600  | -0.57120900 | -2.91625400 |
| O  | 0.19362300  | 0.86293600  | -2.62690100 |
| O  | -0.16409700 | -1.14634000 | -4.13543500 |
| C  | 2.21536300  | -0.80342200 | -3.03661400 |
| C  | 3.05270700  | -0.14955700 | -2.12752900 |
| C  | 2.72636200  | -1.66777800 | -4.00575300 |
| C  | 4.42139300  | -0.39530200 | -2.16242900 |
| H  | 2.63483100  | 0.52142300  | -1.38519200 |
| C  | 4.09833000  | -1.91080300 | -4.05376900 |
| H  | 2.04665900  | -2.14543300 | -4.70277700 |
| C  | 4.91968800  | -1.28455600 | -3.11719700 |
| H  | 5.09980000  | 0.07960500  | -1.46479800 |
| H  | 4.53222800  | -2.58223900 | -4.78454000 |
| N  | 6.35686300  | -1.59287100 | -3.11284500 |
| O  | 6.80790000  | -2.25327900 | -4.04606500 |
| O  | 7.02646600  | -1.18244900 | -2.16007800 |
| I  | 2.19708300  | -1.88647600 | 1.73395100  |

|   |             |             |             |
|---|-------------|-------------|-------------|
| C | 4.28888700  | -1.52543400 | 2.11948300  |
| C | 4.66229900  | -0.92140600 | 3.31793300  |
| C | 5.20123300  | -1.86341800 | 1.12145100  |
| C | 6.02168300  | -0.67286600 | 3.52442400  |
| H | 3.92198200  | -0.62539300 | 4.05186700  |
| C | 6.55474400  | -1.59940500 | 1.34664000  |
| H | 4.87881700  | -2.30673300 | 0.18616800  |
| C | 6.96073500  | -1.01080900 | 2.54637300  |
| H | 6.34061700  | -0.20291800 | 4.45029300  |
| H | 7.27564400  | -1.83761900 | 0.57061700  |
| H | 8.01352400  | -0.80397500 | 2.71533400  |
| N | 1.58245600  | -0.02260100 | 1.02189800  |
| S | 1.03495500  | 0.96772600  | 2.27654500  |
| O | -0.40073100 | 0.76633800  | 2.56831000  |
| O | 1.95557900  | 0.97623700  | 3.43215500  |
| C | 1.22665700  | 2.52294700  | 1.38269500  |
| C | 0.63083200  | 2.70502900  | 0.12950800  |
| C | 1.96072900  | 3.53483500  | 2.00619000  |
| C | 0.78138500  | 3.93120800  | -0.51459700 |
| H | 0.09050500  | 1.90150300  | -0.35988200 |
| C | 2.09277100  | 4.76725300  | 1.37093400  |
| H | 2.41724900  | 3.35142200  | 2.97218700  |
| C | 1.50018100  | 4.94225200  | 0.12168900  |
| H | 0.35593100  | 4.10096900  | -1.49577500 |
| H | 2.64492700  | 5.58258800  | 1.82132600  |
| N | 1.64548200  | 6.24651500  | -0.55236700 |
| O | 2.30623800  | 7.11198800  | 0.02047500  |
| O | 1.09532500  | 6.38804800  | -1.64232800 |
| O | -2.81481200 | -1.33148300 | -0.61940500 |
| P | -3.97181300 | -0.49040400 | -0.02562400 |

|   |             |             |             |
|---|-------------|-------------|-------------|
| C | -7.11373300 | -3.53600800 | -1.77542000 |
| C | -6.91482900 | -2.19117100 | -2.48573000 |
| C | -5.61695200 | -1.49967400 | -2.03800200 |
| C | -5.56753900 | -1.31289500 | -0.50020300 |
| C | -5.77899900 | -2.66831900 | 0.21319900  |
| C | -7.07340800 | -3.35769500 | -0.25258500 |
| H | -6.31795700 | -4.22987000 | -2.08222300 |
| H | -8.06405400 | -3.99209000 | -2.07966500 |
| H | -7.77184900 | -1.53525700 | -2.27114000 |
| H | -4.75077600 | -2.09828300 | -2.34502200 |
| H | -6.37414200 | -0.62924300 | -0.19699100 |
| H | -4.91913600 | -3.31864400 | 0.00662000  |
| H | -5.82023300 | -2.52711100 | 1.29801500  |
| H | -7.93744000 | -2.75527000 | 0.06551300  |
| H | -7.16794700 | -4.32785600 | 0.25117600  |
| H | -6.89312400 | -2.33098500 | -3.57353000 |
| H | -5.52389200 | -0.53470000 | -2.54732700 |
| C | -4.50399200 | 3.57445700  | -2.47312600 |
| C | -3.13633600 | 2.87877300  | -2.43099200 |
| C | -3.25146000 | 1.40138100  | -2.02249000 |
| C | -3.98117900 | 1.26650400  | -0.66475900 |
| C | -5.37358400 | 1.93960200  | -0.72817100 |
| C | -5.24782000 | 3.41773500  | -1.13908400 |
| H | -5.11065700 | 3.13426000  | -3.27843000 |
| H | -4.38635100 | 4.63773500  | -2.71654300 |
| H | -2.48605700 | 3.40012500  | -1.71243900 |
| H | -3.80319500 | 0.85336900  | -2.79733100 |
| H | -3.38248100 | 1.81230800  | 0.08105000  |
| H | -5.99821900 | 1.41964400  | -1.46654800 |
| H | -5.89857100 | 1.86930600  | 0.23155300  |

|   |             |             |             |
|---|-------------|-------------|-------------|
| H | -4.70755000 | 3.96447100  | -0.35237900 |
| H | -6.24774500 | 3.86583700  | -1.20054100 |
| H | -2.63723800 | 2.94483400  | -3.40462300 |
| H | -2.25609300 | 0.95614700  | -1.97347300 |
| C | -4.11121300 | -0.81597000 | 4.72908100  |
| C | -4.62529800 | 0.46867700  | 4.06420300  |
| C | -4.96799800 | 0.25098000  | 2.57873600  |
| C | -3.76134200 | -0.34054500 | 1.81690100  |
| C | -3.26549200 | -1.64740600 | 2.48170700  |
| C | -2.91752100 | -1.39990100 | 3.95925100  |
| H | -4.92353400 | -1.55783600 | 4.76254900  |
| H | -3.83093000 | -0.61262500 | 5.77014600  |
| H | -3.85451200 | 1.24847800  | 4.13976700  |
| H | -5.82657600 | -0.43120000 | 2.50071700  |
| H | -2.92984100 | 0.37808700  | 1.89370000  |
| H | -4.03957100 | -2.42192100 | 2.41984900  |
| H | -2.39272500 | -2.02857200 | 1.94323300  |
| H | -2.06612500 | -0.70911100 | 4.01385200  |
| H | -5.51015200 | 0.84743100  | 4.59142400  |
| H | -5.28086700 | 1.20463600  | 2.13882900  |
| H | -2.59462400 | -2.34253600 | 4.41987700  |

S12

0 imaginary frequency

H = -5603.033057

G = -5603.150422

Esol = -5603.789334

|    |             |             |             |
|----|-------------|-------------|-------------|
| Se | 0.30727200  | -0.39884000 | -1.51100500 |
| N  | -0.03391600 | -2.07076300 | -1.67391000 |

|   |             |             |             |
|---|-------------|-------------|-------------|
| S | -0.58732500 | -3.07951500 | -0.45158700 |
| O | -0.00333200 | -2.73458500 | 0.85396800  |
| O | -0.45178800 | -4.43493600 | -0.98405100 |
| C | -2.35158000 | -2.71517500 | -0.37441300 |
| C | -2.83758300 | -1.87353700 | 0.62641800  |
| C | -3.19748400 | -3.28527800 | -1.33009800 |
| C | -4.19583800 | -1.56844100 | 0.65628700  |
| H | -2.15418800 | -1.45745400 | 1.35575300  |
| C | -4.55606900 | -2.98428200 | -1.30297900 |
| H | -2.79349200 | -3.96002700 | -2.07687100 |
| C | -5.02753900 | -2.11944300 | -0.31570500 |
| H | -4.61309100 | -0.91256700 | 1.40956100  |
| H | -5.24646700 | -3.40084600 | -2.02581900 |
| N | -6.45892500 | -1.76719500 | -0.30274600 |
| O | -6.82574700 | -0.90630300 | 0.49748700  |
| O | -7.19669300 | -2.34799900 | -1.09592100 |
| N | -0.57203700 | 0.24717600  | -0.13513800 |
| S | -0.76574200 | 1.90345300  | -0.20439600 |
| O | -0.13591700 | 2.52606800  | 0.97222000  |
| O | -0.42045600 | 2.42317400  | -1.54569800 |
| C | -2.54647300 | 2.06362100  | 0.00935800  |
| C | -3.06689500 | 2.19994000  | 1.29808800  |
| C | -3.36983600 | 2.06117100  | -1.11862700 |
| C | -4.44448800 | 2.32468400  | 1.46470800  |
| H | -2.39801800 | 2.22543000  | 2.15111500  |
| C | -4.74711100 | 2.18603600  | -0.95527400 |
| H | -2.93456400 | 1.97914200  | -2.10863900 |
| C | -5.25917300 | 2.31086700  | 0.33454700  |
| H | -4.89189100 | 2.43868100  | 2.44431700  |
| H | -5.42269600 | 2.19447200  | -1.80154200 |

|   |             |             |             |
|---|-------------|-------------|-------------|
| N | -6.71889300 | 2.45948000  | 0.50860400  |
| O | -7.14247600 | 2.57475400  | 1.65610300  |
| O | -7.41099500 | 2.47048100  | -0.50597000 |
| O | 2.32149200  | -0.68185900 | -0.80876200 |
| P | 3.35449700  | 0.00404900  | 0.14278500  |
| C | 7.77258700  | -0.90850500 | -1.42033800 |
| C | 6.56348100  | -1.13544700 | -2.33931200 |
| C | 5.34118900  | -0.32727200 | -1.87261100 |
| C | 4.99419300  | -0.67311200 | -0.40778300 |
| C | 6.19936700  | -0.41118800 | 0.52291800  |
| C | 7.42708600  | -1.20880500 | 0.04536500  |
| H | 8.10235200  | 0.13734200  | -1.50784600 |
| H | 8.61729700  | -1.52932400 | -1.74278600 |
| H | 6.30601500  | -2.20418500 | -2.35242000 |
| H | 5.57367400  | 0.74244400  | -1.95470300 |
| H | 4.78097800  | -1.75227600 | -0.38130700 |
| H | 6.44469700  | 0.65816000  | 0.52504300  |
| H | 5.96595000  | -0.68488100 | 1.55788900  |
| H | 7.22156100  | -2.28299600 | 0.15904500  |
| H | 8.28270500  | -0.98435700 | 0.69411600  |
| H | 6.81180700  | -0.86135700 | -3.37193000 |
| H | 4.48137900  | -0.52502600 | -2.52092000 |
| C | 1.69233600  | -1.98898000 | 4.06750900  |
| C | 1.60048800  | -0.46313200 | 3.94363700  |
| C | 1.78590400  | 0.00551600  | 2.49053800  |
| C | 3.11859400  | -0.51298000 | 1.90153900  |
| C | 3.22086600  | -2.05324900 | 2.03998000  |
| C | 3.02194500  | -2.49897700 | 3.49838600  |
| H | 0.86459900  | -2.44943300 | 3.51255300  |
| H | 1.58739500  | -2.29263600 | 5.11671800  |

|   |            |             |             |
|---|------------|-------------|-------------|
| H | 2.36808100 | 0.00345800  | 4.57999600  |
| H | 0.95659200 | -0.36656900 | 1.87922200  |
| H | 3.94865300 | -0.05232000 | 2.45981300  |
| H | 2.45030300 | -2.51561300 | 1.41325000  |
| H | 4.19385300 | -2.41165900 | 1.68304300  |
| H | 3.85390500 | -2.12395300 | 4.11407900  |
| H | 3.06499600 | -3.59387800 | 3.54619800  |
| H | 0.63145500 | -0.10465800 | 4.31234900  |
| H | 1.73866100 | 1.09847100  | 2.45305300  |
| C | 3.80135500 | 4.67373800  | -0.60225300 |
| C | 3.94248900 | 4.13308500  | 0.82795700  |
| C | 4.26903100 | 2.62919400  | 0.83350200  |
| C | 3.19646900 | 1.84358100  | 0.04628800  |
| C | 3.07259300 | 2.37164600  | -1.40398300 |
| C | 2.75987600 | 3.87711900  | -1.40098900 |
| H | 4.77668500 | 4.61541700  | -1.10889600 |
| H | 3.52682600 | 5.73535300  | -0.57673600 |
| H | 3.00403600 | 4.29735300  | 1.37521900  |
| H | 5.25357100 | 2.47800500  | 0.37126300  |
| H | 2.22943900 | 2.02970800  | 0.53455000  |
| H | 4.00774300 | 2.19562700  | -1.94938000 |
| H | 2.28351500 | 1.83270500  | -1.93704200 |
| H | 1.76226300 | 4.03060000  | -0.97268000 |
| H | 4.72541200 | 4.67831300  | 1.36974700  |
| H | 4.34264900 | 2.26852600  | 1.86691100  |
| H | 2.71471900 | 4.23801300  | -2.43580000 |

S13

0 imaginary frequency



H = -5760.209673

G = -5760.340768

Esol = -5761.083006

|    |             |             |             |
|----|-------------|-------------|-------------|
| Se | -0.70802800 | -1.71456000 | -0.67489900 |
| N  | -0.92626200 | -2.38392200 | 0.89048700  |
| N  | 0.99414000  | -1.75780600 | -1.07942300 |
| S  | 0.16244700  | -3.27974200 | 1.78944900  |
| O  | 0.59786000  | -4.47657200 | 1.05489300  |
| O  | -0.48744000 | -3.43453500 | 3.09426100  |
| S  | 1.27401600  | -1.17043600 | -2.63140500 |
| O  | -0.00643100 | -0.74548200 | -3.24593600 |
| O  | 2.12437200  | -2.11793100 | -3.35506300 |
| C  | -1.85923700 | -3.75316000 | -2.35994500 |
| C  | -0.99762100 | -4.62593000 | -1.79932300 |
| C  | 0.37269100  | -4.94121100 | -2.30808700 |
| H  | -1.28743700 | -5.13371400 | -0.87938900 |
| H  | 0.56474100  | -4.40943100 | -3.24590000 |
| H  | 1.09610400  | -4.55907700 | -1.57348500 |
| H  | -2.85024000 | -3.58989100 | -1.94231200 |
| H  | -1.62117200 | -3.22651400 | -3.28179300 |
| C  | 0.59947600  | -6.45273100 | -2.48536900 |
| H  | 1.62324300  | -6.64612600 | -2.82192600 |
| H  | 0.44966000  | -6.98675600 | -1.54012000 |
| H  | -0.08741400 | -6.87540300 | -3.22729800 |
| C  | 2.25391900  | 0.30673900  | -2.31127300 |
| C  | 1.77106000  | 1.26622400  | -1.41804200 |
| C  | 3.43970600  | 0.48647200  | -3.02352700 |
| C  | 2.48915600  | 2.44517000  | -1.24858000 |
| H  | 0.85653900  | 1.09052400  | -0.85898400 |
| C  | 4.16077300  | 1.66733200  | -2.85128700 |

|   |             |             |             |
|---|-------------|-------------|-------------|
| H | 3.78800500  | -0.28887900 | -3.69660400 |
| C | 3.66770200  | 2.62723600  | -1.97132200 |
| H | 2.15617900  | 3.21973000  | -0.56903700 |
| H | 5.08573300  | 1.85095800  | -3.38357900 |
| N | 4.41552500  | 3.88719700  | -1.79814100 |
| O | 5.46500800  | 4.01755400  | -2.42429900 |
| O | 3.93732700  | 4.73227700  | -1.04229500 |
| C | 1.61003200  | -2.23267300 | 2.02199400  |
| C | 2.83192600  | -2.86333300 | 2.26365900  |
| C | 1.48493300  | -0.84272900 | 2.03473300  |
| C | 3.95333600  | -2.08931200 | 2.54866200  |
| H | 2.90336500  | -3.94437800 | 2.21703100  |
| C | 2.60384300  | -0.06691000 | 2.32192800  |
| H | 0.53691800  | -0.36756900 | 1.80695700  |
| C | 3.81706900  | -0.70295200 | 2.57772200  |
| H | 4.91951800  | -2.53834100 | 2.74191700  |
| H | 2.55356100  | 1.01442200  | 2.34249300  |
| N | 4.99977600  | 0.12222200  | 2.88040600  |
| O | 4.85382200  | 1.34427800  | 2.89383400  |
| O | 6.06034800  | -0.45958400 | 3.10190900  |
| P | -2.25005800 | 1.52640100  | 0.46902400  |
| C | 0.04319600  | 5.49927100  | 1.75380200  |
| C | -0.08480800 | 4.34098300  | 2.75087600  |
| C | -0.46593000 | 3.02699100  | 2.04983100  |
| C | -1.77434000 | 3.17379700  | 1.23286700  |
| C | -1.62400300 | 4.33230600  | 0.21914000  |
| C | -1.23472300 | 5.64659100  | 0.91885000  |
| H | 0.89715800  | 5.31405600  | 1.08585400  |
| H | 0.26105100  | 6.43537200  | 2.28185800  |
| H | -0.84954100 | 4.58689300  | 3.50241900  |

|   |             |             |             |
|---|-------------|-------------|-------------|
| H | 0.33814500  | 2.72810100  | 1.36549600  |
| H | -2.59102800 | 3.43138300  | 1.92427300  |
| H | -0.84978700 | 4.07317200  | -0.51739900 |
| H | -2.55253100 | 4.48874300  | -0.33980400 |
| H | -2.06248500 | 5.96188300  | 1.57117300  |
| H | -1.11344900 | 6.43549200  | 0.16639900  |
| H | 0.85550300  | 4.20169100  | 3.29814600  |
| H | -0.55142500 | 2.22321000  | 2.78689000  |
| C | -4.26305700 | -1.52282500 | 3.45961400  |
| C | -4.97819000 | -1.26282800 | 2.12893200  |
| C | -4.05724200 | -0.57416300 | 1.10678600  |
| C | -3.43647800 | 0.73005100  | 1.66418300  |
| C | -2.76174000 | 0.47953200  | 3.03591700  |
| C | -3.70851500 | -0.21297000 | 4.03004700  |
| H | -3.43723700 | -2.23019800 | 3.30428000  |
| H | -4.95227800 | -1.98759200 | 4.17532500  |
| H | -5.86109000 | -0.63004700 | 2.30576200  |
| H | -3.25344100 | -1.26585000 | 0.83101800  |
| H | -4.24383000 | 1.46628700  | 1.80444800  |
| H | -1.87765400 | -0.15241000 | 2.88819000  |
| H | -2.41767400 | 1.42572100  | 3.46815300  |
| H | -4.54071700 | 0.46428700  | 4.27497900  |
| H | -3.16877300 | -0.39907400 | 4.96635200  |
| H | -5.34819500 | -2.20211700 | 1.69968500  |
| H | -4.62964800 | -0.36166200 | 0.19791400  |
| C | -5.12866300 | 1.74999500  | -3.32152200 |
| C | -3.73129300 | 1.13064800  | -3.46956200 |
| C | -3.15334600 | 0.68956100  | -2.11467900 |
| C | -3.13382800 | 1.88126600  | -1.12804600 |
| C | -4.54621400 | 2.48595900  | -0.95727600 |

|   |             |             |             |
|---|-------------|-------------|-------------|
| C | -5.12460600 | 2.91248700  | -2.31804200 |
| H | -5.83322900 | 0.97842300  | -2.97716800 |
| H | -5.49699700 | 2.09508900  | -4.29536100 |
| H | -3.05187800 | 1.86333900  | -3.92830000 |
| H | -3.77026000 | -0.12348200 | -1.71179300 |
| H | -2.49840800 | 2.64873100  | -1.59269400 |
| H | -5.21306800 | 1.74135900  | -0.50274500 |
| H | -4.52953300 | 3.34607500  | -0.27557600 |
| H | -4.52249000 | 3.74004200  | -2.72070800 |
| H | -6.14023600 | 3.30366200  | -2.18004700 |
| H | -3.76333900 | 0.27133400  | -4.15001900 |
| H | -2.14636800 | 0.28892800  | -2.25260100 |
| O | -0.98540400 | 0.68353600  | 0.22080300  |

S14

0 imaginary frequency

H = -5760.242317

G = -5760.371460

Esol = -5761.116484

|    |             |             |             |
|----|-------------|-------------|-------------|
| Se | -0.77851900 | 0.08430300  | 1.33951200  |
| N  | -2.59778600 | 0.48496100  | 1.88666200  |
| N  | -0.07332900 | 1.64271200  | 1.83199300  |
| S  | -3.75688300 | -0.66745000 | 1.60257700  |
| O  | -4.65183000 | -0.77666600 | 2.75776100  |
| O  | -3.03578500 | -1.85072800 | 1.09915500  |
| S  | -0.32218200 | 2.81690900  | 0.70305800  |
| O  | -1.00101700 | 3.97819700  | 1.29317500  |
| O  | -0.89430900 | 2.24608000  | -0.54986100 |
| C  | -0.17713500 | -0.79891500 | 3.05663400  |

|   |             |             |             |
|---|-------------|-------------|-------------|
| C | -0.92635700 | -0.31738600 | 4.24470800  |
| C | -0.54236500 | 0.73124300  | 4.98712400  |
| H | -1.83343400 | -0.86093100 | 4.50701100  |
| H | 0.35813900  | 1.27173000  | 4.69824000  |
| H | -0.29332700 | -1.86704500 | 2.86624000  |
| H | 0.87536700  | -0.52188100 | 3.03707900  |
| C | -1.26614500 | 1.23453800  | 6.19864900  |
| H | -1.56088900 | 2.28404100  | 6.06737100  |
| H | -2.16534200 | 0.64729200  | 6.41143000  |
| H | -0.61662600 | 1.20266800  | 7.08365500  |
| C | 1.36127900  | 3.35165500  | 0.32779500  |
| C | 1.58410900  | 4.69607300  | 0.02338900  |
| C | 2.39573300  | 2.41365500  | 0.30967000  |
| C | 2.86701200  | 5.11469300  | -0.32185000 |
| H | 0.76270500  | 5.40235000  | 0.07303800  |
| C | 3.67903200  | 2.82897100  | -0.03299200 |
| H | 2.18775800  | 1.38174100  | 0.57476600  |
| C | 3.89224800  | 4.17076900  | -0.34616800 |
| H | 3.08259800  | 6.14804900  | -0.56344000 |
| H | 4.51244900  | 2.13862900  | -0.05523500 |
| N | 5.25200000  | 4.60426700  | -0.70947500 |
| O | 5.42338100  | 5.79400800  | -0.97056000 |
| O | 6.13772300  | 3.74864500  | -0.73299000 |
| C | -4.68654900 | 0.01838400  | 0.22465700  |
| C | -4.02301500 | 0.77011100  | -0.74919300 |
| C | -6.05012600 | -0.26865400 | 0.13826700  |
| C | -4.74545000 | 1.23895700  | -1.84275300 |
| H | -2.97170000 | 1.01685900  | -0.64285600 |
| C | -6.77208000 | 0.19811700  | -0.95725000 |
| H | -6.53829400 | -0.83451300 | 0.92423400  |

|   |             |             |             |
|---|-------------|-------------|-------------|
| C | -6.10417300 | 0.94000900  | -1.92927100 |
| H | -4.27291900 | 1.83461800  | -2.61356500 |
| H | -7.83164500 | 0.00294500  | -1.06480000 |
| N | -6.86790800 | 1.43311200  | -3.09158700 |
| O | -8.06851300 | 1.16926900  | -3.13717700 |
| O | -6.25623500 | 2.07353500  | -3.94435600 |
| P | 1.91063200  | -2.01561800 | -0.41451000 |
| C | 1.32594900  | -0.23219300 | -4.78854500 |
| C | 0.39220600  | 0.20642300  | -3.65161000 |
| C | 0.99091500  | -0.10187100 | -2.27172900 |
| C | 1.36013100  | -1.59641000 | -2.15009600 |
| C | 2.31143100  | -2.03576000 | -3.28594700 |
| C | 1.70013600  | -1.71643000 | -4.66210900 |
| H | 2.24282100  | 0.37501900  | -4.76040000 |
| H | 0.85764200  | -0.04410300 | -5.76254200 |
| H | -0.57142400 | -0.31509000 | -3.75200900 |
| H | 1.88588000  | 0.51637900  | -2.11776700 |
| H | 0.42713000  | -2.16501600 | -2.27564500 |
| H | 3.26970000  | -1.50817800 | -3.19387400 |
| H | 2.53430700  | -3.10816700 | -3.22049600 |
| H | 0.80079100  | -2.33271000 | -4.80812300 |
| H | 2.40619000  | -2.00328200 | -5.45152900 |
| H | 0.17370800  | 1.27839300  | -3.71970300 |
| H | 0.28810200  | 0.17567000  | -1.48366300 |
| C | -0.61098600 | -6.04565600 | -0.23221200 |
| C | -1.06064000 | -4.80973400 | 0.56144400  |
| C | -0.42088100 | -3.53362800 | -0.00314300 |
| C | 1.11992600  | -3.64093500 | 0.00348900  |
| C | 1.56897600  | -4.85767700 | -0.83371300 |
| C | 0.92091300  | -6.14991000 | -0.30086600 |

|   |             |             |             |
|---|-------------|-------------|-------------|
| H | -1.01414300 | -5.98211500 | -1.25374300 |
| H | -1.02889600 | -6.95828500 | 0.21028100  |
| H | -0.77464600 | -4.92548000 | 1.61733200  |
| H | -0.77575000 | -3.39746200 | -1.03447900 |
| H | 1.43311700  | -3.80853400 | 1.04526700  |
| H | 1.27114700  | -4.71080400 | -1.88155200 |
| H | 2.66060500  | -4.96429900 | -0.82824500 |
| H | 1.31681100  | -6.35591500 | 0.70439900  |
| H | 1.21747700  | -6.99726500 | -0.93161500 |
| H | -2.15139500 | -4.70866100 | 0.54242800  |
| H | -0.75770600 | -2.65311400 | 0.54740900  |
| C | 6.46515400  | -1.76291800 | 0.77894400  |
| C | 6.00684500  | -1.07033500 | -0.51119000 |
| C | 4.47910400  | -0.90289800 | -0.54724600 |
| C | 3.75100400  | -2.25644400 | -0.37649200 |
| C | 4.21142400  | -2.94067000 | 0.93217900  |
| C | 5.74099100  | -3.10156800 | 0.97521300  |
| H | 6.25444500  | -1.10717500 | 1.63623800  |
| H | 7.55090800  | -1.91760600 | 0.76327500  |
| H | 6.32838900  | -1.66331600 | -1.38000100 |
| H | 4.16413800  | -0.24059100 | 0.26879300  |
| H | 4.01193600  | -2.90765200 | -1.22300500 |
| H | 3.88151600  | -2.33219700 | 1.78520400  |
| H | 3.74130500  | -3.92441300 | 1.04404200  |
| H | 6.05062900  | -3.80198400 | 0.18547200  |
| H | 6.03322900  | -3.55898000 | 1.92872800  |
| H | 6.48597800  | -0.08835400 | -0.60989200 |
| H | 4.18021400  | -0.41367700 | -1.48149700 |
| H | -2.68887500 | 0.99370300  | 2.76675700  |
| O | 1.50315300  | -0.94630300 | 0.60675200  |

S15

0 imaginary frequency

H = -5760.250957

G = -5760.379243

Esol = -5761.126787

|    |             |             |             |
|----|-------------|-------------|-------------|
| Se | 0.61218800  | -0.42279000 | -1.12709500 |
| N  | 2.28079700  | -0.99731200 | -2.04380600 |
| N  | 0.15145700  | 0.89837200  | -2.33252300 |
| S  | 3.03601500  | -2.17296100 | -1.13886200 |
| O  | 3.84800200  | -3.04304800 | -1.98771500 |
| O  | 1.95490600  | -2.74849500 | -0.30876100 |
| S  | 1.04055800  | 2.32942900  | -2.31509900 |
| O  | 1.01149000  | 2.92230700  | -3.65549700 |
| O  | 2.33074500  | 2.02593100  | -1.67743600 |
| C  | -0.27491400 | -1.10982600 | -5.19481800 |
| C  | -0.13306700 | 0.10873100  | -4.67505200 |
| C  | -0.83533200 | 0.56149000  | -3.42137900 |
| H  | 0.49744500  | 0.85101300  | -5.16067900 |
| H  | -1.38335200 | -0.28176900 | -2.99592600 |
| H  | 0.23205400  | -1.40396900 | -6.10956500 |
| H  | -0.89668200 | -1.86750400 | -4.72139700 |
| C  | -1.84673100 | 1.68884400  | -3.66578300 |
| H  | -2.33006100 | 1.97836000  | -2.72690000 |
| H  | -1.38218300 | 2.56711000  | -4.11912200 |
| H  | -2.61597000 | 1.32009400  | -4.35207600 |
| C  | 0.14084800  | 3.43836700  | -1.21247900 |
| C  | 0.18674600  | 4.80730000  | -1.48775200 |
| C  | -0.53246200 | 2.92927700  | -0.09907300 |



|   |             |             |             |
|---|-------------|-------------|-------------|
| C | -0.45246700 | 5.69504800  | -0.62590200 |
| H | 0.70199800  | 5.16789100  | -2.37119000 |
| C | -1.17647600 | 3.81709600  | 0.75798500  |
| H | -0.58941000 | 1.86181600  | 0.07918300  |
| C | -1.12245200 | 5.18194100  | 0.48266100  |
| H | -0.44459600 | 6.76332600  | -0.80265300 |
| H | -1.71887000 | 3.46621300  | 1.62694300  |
| N | -1.81088100 | 6.11700800  | 1.39248900  |
| O | -1.74552200 | 7.31683000  | 1.13243800  |
| O | -2.40898100 | 5.63759800  | 2.35477000  |
| C | 4.18489000  | -1.30455900 | -0.04179700 |
| C | 3.80083200  | -0.10197800 | 0.56083300  |
| C | 5.42712200  | -1.88857200 | 0.21449900  |
| C | 4.67746400  | 0.52657200  | 1.43991500  |
| H | 2.84018500  | 0.34389600  | 0.32838200  |
| C | 6.30411600  | -1.26434000 | 1.09846400  |
| H | 5.70242500  | -2.81067600 | -0.28510600 |
| C | 5.91084800  | -0.06945800 | 1.69712000  |
| H | 4.42249300  | 1.46365900  | 1.91855500  |
| H | 7.27735500  | -1.68225300 | 1.32368300  |
| N | 6.83754200  | 0.59340900  | 2.63454700  |
| O | 7.92525100  | 0.05595100  | 2.83533000  |
| O | 6.46332600  | 1.64094500  | 3.15894100  |
| P | -2.40392300 | -1.30556700 | 0.71493300  |
| C | 0.23102500  | -2.76764800 | 4.39869700  |
| C | 0.89451000  | -2.00938000 | 3.24004600  |
| C | -0.13361500 | -1.23206300 | 2.40400600  |
| C | -1.24936400 | -2.17294100 | 1.89491000  |
| C | -1.92855800 | -2.92296400 | 3.06201600  |
| C | -0.88716800 | -3.69178900 | 3.89483000  |

|   |             |             |             |
|---|-------------|-------------|-------------|
| H | -0.19179500 | -2.04514200 | 5.11282300  |
| H | 0.97934500  | -3.34951600 | 4.95084200  |
| H | 1.41911200  | -2.71742500 | 2.58395400  |
| H | -0.56372800 | -0.41976900 | 3.00530100  |
| H | -0.74983500 | -2.92249900 | 1.26477700  |
| H | -2.44575400 | -2.20597100 | 3.71367700  |
| H | -2.69228700 | -3.61807800 | 2.69293700  |
| H | -0.44962300 | -4.48838700 | 3.27607200  |
| H | -1.38447800 | -4.18716600 | 4.73829600  |
| H | 1.65415100  | -1.31716600 | 3.62472200  |
| H | 0.35331900  | -0.76870000 | 1.54341900  |
| C | -3.39438500 | -5.14832000 | -1.95753300 |
| C | -2.32750200 | -4.13782000 | -2.40419400 |
| C | -1.81437100 | -3.30712400 | -1.21768800 |
| C | -2.98587400 | -2.57547200 | -0.51802300 |
| C | -4.02217500 | -3.60880700 | -0.02191700 |
| C | -4.53824000 | -4.46335100 | -1.19482800 |
| H | -2.92442400 | -5.89862200 | -1.30488900 |
| H | -3.79244800 | -5.69368900 | -2.82223400 |
| H | -2.75337300 | -3.46549700 | -3.16423100 |
| H | -1.33232300 | -3.98796400 | -0.50260900 |
| H | -3.47651900 | -1.94265900 | -1.27396300 |
| H | -3.55556300 | -4.26816800 | 0.72285500  |
| H | -4.86903300 | -3.12164100 | 0.47490700  |
| H | -5.10052100 | -3.81648100 | -1.88429100 |
| H | -5.24855800 | -5.21143400 | -0.82090000 |
| H | -1.48703500 | -4.65722500 | -2.88016800 |
| H | -1.04012700 | -2.60295500 | -1.53537700 |
| C | -5.78804800 | 1.50784800  | 2.38531500  |
| C | -4.74781800 | 0.96790900  | 3.37536900  |

|   |             |             |             |
|---|-------------|-------------|-------------|
| C | -3.51362600 | 0.40230500  | 2.65320900  |
| C | -3.89985800 | -0.68720500 | 1.62523400  |
| C | -4.94650300 | -0.12954500 | 0.63060700  |
| C | -6.17719300 | 0.43707500  | 1.35796600  |
| H | -5.37137400 | 2.38027700  | 1.86151000  |
| H | -6.67677300 | 1.86111200  | 2.92250700  |
| H | -5.20351100 | 0.17533700  | 3.98722100  |
| H | -2.99344800 | 1.21133000  | 2.12372700  |
| H | -4.34010400 | -1.53839400 | 2.16457700  |
| H | -4.47423800 | 0.66219100  | 0.03418700  |
| H | -5.26582500 | -0.90591800 | -0.07425300 |
| H | -6.70534000 | -0.38234200 | 1.86780600  |
| H | -6.87893200 | 0.84932300  | 0.62208000  |
| H | -4.43517200 | 1.75739900  | 4.06987500  |
| H | -2.80718200 | 0.00575300  | 3.39087200  |
| H | 2.88884900  | -0.19618300 | -2.23259100 |
| O | -1.72579200 | -0.13255300 | -0.00115800 |

S16

0 imaginary frequency

H = -5989.384224

G = -5989.524426

Esol = -5990.329428

|    |             |             |             |
|----|-------------|-------------|-------------|
| Se | -0.57735000 | 0.14614500  | -0.84332900 |
| N  | -2.36580200 | 0.09231900  | -1.75547600 |
| N  | -0.42014400 | -1.63936600 | -0.46578100 |
| S  | -3.22320300 | 1.51522600  | -1.31362300 |
| O  | -4.13810300 | 1.89665300  | -2.39361800 |
| O  | -2.26357700 | 2.50818100  | -0.79742200 |

|   |             |             |             |
|---|-------------|-------------|-------------|
| S | 0.13892100  | -2.77299300 | -1.58941300 |
| O | 0.58848100  | -2.03863400 | -2.77426200 |
| O | -0.86149200 | -3.84166000 | -1.70483800 |
| C | -0.33466400 | 0.95811700  | -4.44704600 |
| C | -1.59576600 | 0.97949900  | -4.01048100 |
| C | -2.21886300 | -0.16952500 | -3.25731300 |
| H | -2.23641000 | 1.83849900  | -4.20220000 |
| H | -1.50998200 | -0.99943600 | -3.27023500 |
| H | -1.08882100 | -2.04056200 | 0.20971200  |
| H | 0.08095700  | 1.78794800  | -5.01377500 |
| H | 0.31605800  | 0.10648100  | -4.26595700 |
| C | -3.52751400 | -0.66368200 | -3.88848600 |
| H | -3.94783800 | -1.49653000 | -3.31708200 |
| H | -4.27269400 | 0.12945600  | -3.96400100 |
| H | -3.30182400 | -1.02488700 | -4.89774500 |
| C | 1.58017000  | -3.47083100 | -0.77176500 |
| C | 2.53649400  | -2.61701700 | -0.21627400 |
| C | 1.72561200  | -4.85924000 | -0.76735800 |
| C | 3.67265600  | -3.17978900 | 0.35902800  |
| H | 2.38893200  | -1.53875500 | -0.21052600 |
| C | 2.86524300  | -5.41893100 | -0.19417300 |
| H | 0.95312100  | -5.48573900 | -1.19867300 |
| C | 3.81819400  | -4.56647200 | 0.35800200  |
| H | 4.44065700  | -2.56315600 | 0.80885900  |
| H | 3.02048700  | -6.49013000 | -0.16643800 |
| C | -4.23517500 | 0.96395600  | 0.07477200  |
| C | -3.63805900 | 0.35417800  | 1.18090200  |
| C | -5.60458500 | 1.22978600  | 0.03107600  |
| C | -4.42857000 | -0.00469200 | 2.26771200  |
| H | -2.57619300 | 0.14095600  | 1.17219700  |

|   |             |             |             |
|---|-------------|-------------|-------------|
| C | -6.39749600 | 0.88010000  | 1.12221000  |
| H | -6.03629800 | 1.69850700  | -0.84581500 |
| C | -5.79420600 | 0.27131400  | 2.22007600  |
| H | -4.00573600 | -0.49542800 | 3.13501800  |
| H | -7.46373000 | 1.06875000  | 1.13210300  |
| N | 5.02454100  | -5.15395500 | 0.97113400  |
| N | -6.63468600 | -0.10259400 | 3.37439000  |
| O | 5.84929300  | -4.38232000 | 1.45906300  |
| O | -6.07832900 | -0.63290800 | 4.33400800  |
| O | 5.13257100  | -6.37891300 | 0.95726300  |
| O | -7.83812000 | 0.13955600  | 3.30359800  |
| O | -2.62447800 | -2.74047100 | 0.95001000  |
| C | -3.49861800 | -3.05051300 | 0.14980900  |
| O | -3.80060400 | -2.33280100 | -0.93426100 |
| C | -4.34290200 | -4.29101100 | 0.26879800  |
| H | -5.38713700 | -4.07753300 | 0.02573600  |
| H | -3.97606400 | -5.02864100 | -0.45440700 |
| H | -4.25648300 | -4.70210600 | 1.27505300  |
| H | -3.19920300 | -1.55082900 | -1.03413100 |
| O | 2.07120700  | 0.52170500  | -0.02650100 |
| P | 2.51407900  | 1.84581200  | 0.59084500  |
| C | 2.43793300  | 4.18982200  | -3.51774200 |
| C | 3.73804600  | 4.20185300  | -2.70575900 |
| C | 3.75124200  | 3.10380500  | -1.62864600 |
| C | 2.53293200  | 3.21096200  | -0.67884600 |
| C | 1.22718900  | 3.19571300  | -1.51416500 |
| C | 1.22095400  | 4.29152400  | -2.59189800 |
| H | 2.37883000  | 3.25384000  | -4.09211200 |
| H | 2.43650000  | 5.00899700  | -4.24780300 |
| H | 3.85602500  | 5.18283600  | -2.22157200 |

|   |             |             |             |
|---|-------------|-------------|-------------|
| H | 3.73464900  | 2.11829800  | -2.11347000 |
| H | 2.59917100  | 4.16286800  | -0.12879500 |
| H | 1.12992600  | 2.21381600  | -1.99230100 |
| H | 0.34784400  | 3.32209300  | -0.87991800 |
| H | 1.21233000  | 5.27992300  | -2.10853500 |
| H | 0.29012100  | 4.21790000  | -3.16688400 |
| H | 4.60606800  | 4.07354600  | -3.36489400 |
| H | 4.68969100  | 3.16720800  | -1.07022400 |
| C | 7.10802200  | 1.82130900  | 1.90648000  |
| C | 6.43634000  | 0.51523300  | 1.45613500  |
| C | 5.17315200  | 0.78788500  | 0.62253100  |
| C | 4.18610100  | 1.68144300  | 1.40388600  |
| C | 4.85402800  | 3.00411200  | 1.84198100  |
| C | 6.12550200  | 2.72640100  | 2.66446900  |
| H | 7.48547700  | 2.35734000  | 1.02300600  |
| H | 7.98059600  | 1.60319800  | 2.53444400  |
| H | 6.16691400  | -0.07937200 | 2.34151300  |
| H | 5.46289800  | 1.27540900  | -0.31604400 |
| H | 3.93101000  | 1.13154600  | 2.32438300  |
| H | 5.12325200  | 3.59896400  | 0.95965500  |
| H | 4.16179300  | 3.61823100  | 2.43169300  |
| H | 5.84188400  | 2.24321800  | 3.61086400  |
| H | 6.60735400  | 3.67556300  | 2.93074400  |
| H | 7.13964800  | -0.09400100 | 0.87517600  |
| H | 4.68164800  | -0.14966100 | 0.34374100  |
| C | -1.01776400 | 2.21826200  | 3.73878600  |
| C | -0.59340600 | 3.50058600  | 3.01082400  |
| C | 0.20122700  | 3.18838700  | 1.73171700  |
| C | 1.43901500  | 2.32235800  | 2.04375800  |
| C | 1.00031300  | 1.01955900  | 2.75743400  |

|   |             |            |            |
|---|-------------|------------|------------|
| C | 0.18947500  | 1.31636900 | 4.02857400 |
| H | -1.73381900 | 1.67191400 | 3.10876000 |
| H | -1.54291000 | 2.46293300 | 4.67050300 |
| H | 0.02416400  | 4.11548400 | 3.68279000 |
| H | -0.44736700 | 2.65155500 | 1.03037900 |
| H | 2.08895600  | 2.89490400 | 2.72286200 |
| H | 0.40552400  | 0.43765300 | 2.04315900 |
| H | 1.86792100  | 0.39782800 | 3.01040000 |
| H | 0.84146100  | 1.80740900 | 4.76628700 |
| H | -1.47351000 | 4.10296100 | 2.75475000 |
| H | 0.49384500  | 4.12691400 | 1.24677500 |
| H | -0.13814600 | 0.37308900 | 4.48381600 |

S17

0 imaginary frequency

H = -5989.383106

G = -5989.523378

Esol = -5990.327792

|    |             |             |             |
|----|-------------|-------------|-------------|
| Se | 0.34355600  | -0.50418600 | 1.08163100  |
| N  | 2.45410000  | -1.43464100 | 1.78309200  |
| N  | 0.10981900  | -1.72935800 | -0.19973200 |
| S  | 3.51345000  | -0.12469000 | 2.21557500  |
| O  | 4.57437100  | -0.57899600 | 3.12032700  |
| O  | 2.64974000  | 0.98958200  | 2.61965400  |
| S  | -0.68555000 | -3.14907100 | 0.20637300  |
| O  | -0.66735600 | -3.42926900 | 1.65694900  |
| O  | -0.20153600 | -4.16341900 | -0.74127900 |
| C  | 0.53491800  | -1.80329900 | 4.56126400  |
| C  | 1.80486900  | -1.87371700 | 4.16094100  |

|   |             |             |             |
|---|-------------|-------------|-------------|
| C | 2.21431500  | -2.49577000 | 2.84869200  |
| H | 2.60536600  | -1.48060900 | 4.78589200  |
| H | 1.35399300  | -3.03231500 | 2.44257600  |
| H | 1.24899200  | -1.99094500 | -1.40309900 |
| H | 0.26929000  | -1.36206600 | 5.51880200  |
| H | -0.27401000 | -2.19571500 | 3.95153700  |
| C | 3.39169300  | -3.47094900 | 2.97340300  |
| H | 4.26930800  | -2.99852500 | 3.42018300  |
| H | 3.08428300  | -4.30889200 | 3.60829700  |
| H | 3.66521600  | -3.87157900 | 1.99141700  |
| C | -2.42412600 | -2.85756300 | -0.19169200 |
| C | -3.23793200 | -2.22011700 | 0.74803500  |
| C | -2.92717400 | -3.28873400 | -1.42024000 |
| C | -4.57613700 | -1.99250300 | 0.44633100  |
| H | -2.82143900 | -1.90227700 | 1.69636100  |
| C | -4.26751400 | -3.06388700 | -1.72877500 |
| H | -2.27222200 | -3.80515500 | -2.11341300 |
| C | -5.06594400 | -2.40874400 | -0.79258400 |
| H | -5.24101000 | -1.50745500 | 1.14971300  |
| H | -4.69689900 | -3.38397800 | -2.67010600 |
| C | 4.27782000  | 0.27825400  | 0.63244300  |
| C | 3.47764600  | 0.60324400  | -0.46493900 |
| C | 5.67061800  | 0.33064000  | 0.57692100  |
| C | 4.08831700  | 0.98729000  | -1.65384000 |
| H | 2.39922500  | 0.51963900  | -0.38189800 |
| C | 6.28381900  | 0.72431900  | -0.61102900 |
| H | 6.25734000  | 0.06426700  | 1.44873400  |
| C | 5.48042000  | 1.04618200  | -1.70197500 |
| H | 3.50850900  | 1.23503700  | -2.53389800 |
| H | 7.36129300  | 0.78154000  | -0.70193900 |



|   |             |             |             |
|---|-------------|-------------|-------------|
| N | -6.47316400 | -2.13557900 | -1.12493300 |
| N | 6.12803100  | 1.46235300  | -2.96216000 |
| O | -6.91778300 | -2.60486300 | -2.17082300 |
| O | 5.39653300  | 1.74525600  | -3.90947900 |
| O | -7.12272000 | -1.44108200 | -0.33970400 |
| O | 7.35622000  | 1.50057500  | -2.98491000 |
| O | 1.88642700  | -2.18359000 | -2.17591000 |
| C | 3.02850100  | -2.69414200 | -1.74682300 |
| O | 3.38471500  | -2.72104900 | -0.57024800 |
| C | 3.87448100  | -3.25497900 | -2.86393200 |
| H | 3.40074400  | -4.16573300 | -3.24700100 |
| H | 3.93046900  | -2.54355600 | -3.69337900 |
| H | 4.87322200  | -3.49244700 | -2.49603700 |
| H | 2.79001200  | -1.88861100 | 0.90654700  |
| O | -1.56692900 | 0.63516000  | 0.83708900  |
| P | -1.86279900 | 1.95061800  | 0.07393000  |
| C | 0.95506000  | 5.60073000  | 1.31287900  |
| C | 1.00067000  | 4.30329600  | 2.13198900  |
| C | 0.44447700  | 3.10844600  | 1.34144000  |
| C | -0.98498400 | 3.40332200  | 0.84103200  |
| C | -1.03367300 | 4.70256700  | 0.00241800  |
| C | -0.46442700 | 5.88834300  | 0.80224500  |
| H | 1.63751800  | 5.51372400  | 0.45441300  |
| H | 1.31655600  | 6.44456800  | 1.91329700  |
| H | 0.41199100  | 4.43282800  | 3.05215300  |
| H | 1.10722600  | 2.90124000  | 0.49262300  |
| H | -1.59753800 | 3.58125800  | 1.73926000  |
| H | -0.44577200 | 4.57836700  | -0.91552900 |
| H | -2.05935900 | 4.93253100  | -0.31314500 |
| H | -1.12467200 | 6.09458500  | 1.65726800  |

|   |             |             |             |
|---|-------------|-------------|-------------|
| H | -0.47340400 | 6.78923700  | 0.17618700  |
| H | 2.02522800  | 4.07610100  | 2.44738300  |
| H | 0.45640200  | 2.21459800  | 1.96878900  |
| C | -6.52922900 | 2.07986100  | 1.02662300  |
| C | -6.08727900 | 2.41008200  | -0.40483100 |
| C | -4.67360400 | 1.87918400  | -0.70227400 |
| C | -3.65264000 | 2.42519700  | 0.31779400  |
| C | -4.09163100 | 2.07254500  | 1.76008300  |
| C | -5.50949600 | 2.59071300  | 2.05345400  |
| H | -6.64045500 | 0.99109500  | 1.12291100  |
| H | -7.51712700 | 2.51237000  | 1.22657200  |
| H | -6.10269400 | 3.50015200  | -0.55397300 |
| H | -4.68911200 | 0.78345900  | -0.65618100 |
| H | -3.65089200 | 3.52190000  | 0.22081700  |
| H | -4.05717700 | 0.98320600  | 1.87878900  |
| H | -3.38858200 | 2.48172400  | 2.49548900  |
| H | -5.50134300 | 3.69089500  | 2.04431300  |
| H | -5.80310000 | 2.29090900  | 3.06712900  |
| H | -6.79301200 | 1.98327300  | -1.12723200 |
| H | -4.38784200 | 2.15665900  | -1.72329500 |
| C | -0.23564200 | 0.46527100  | -4.11878800 |
| C | 0.31735600  | 1.77560900  | -3.54564200 |
| C | 0.03500700  | 1.90498900  | -2.03931400 |
| C | -1.47964600 | 1.80326600  | -1.73726100 |
| C | -2.01221600 | 0.45940500  | -2.29876300 |
| C | -1.73033200 | 0.32559200  | -3.80451100 |
| H | 0.31130700  | -0.38150300 | -3.68230600 |
| H | -0.06829300 | 0.42594900  | -5.20220800 |
| H | -0.13631800 | 2.62985300  | -4.07011300 |
| H | 0.53559100  | 1.09390500  | -1.49694400 |

|   |             |             |             |
|---|-------------|-------------|-------------|
| H | -1.99889400 | 2.64119700  | -2.22855600 |
| H | -1.51469800 | -0.35163400 | -1.75623800 |
| H | -3.08390900 | 0.34967100  | -2.11747600 |
| H | -2.29574600 | 1.09353000  | -4.35375300 |
| H | 1.39840300  | 1.84632500  | -3.72292500 |
| H | 0.45365300  | 2.84615100  | -1.67125900 |
| H | -2.10406100 | -0.64503200 | -4.15296500 |

S18

0 imaginary frequency

H = -3745.975720

G = -3746.044156

Esol = -3746.235665

|    |             |             |             |
|----|-------------|-------------|-------------|
| Se | -1.40463600 | 0.55863600  | 1.29737100  |
| N  | -0.79987700 | -1.14258500 | 0.86374900  |
| S  | -0.10408500 | -1.18988300 | -0.62522100 |
| O  | -0.02994300 | -2.60902300 | -1.00584900 |
| O  | -0.69355100 | -0.22476700 | -1.59259700 |
| C  | 1.61147900  | -0.63828900 | -0.42182600 |
| C  | 2.63552800  | -1.58717500 | -0.39996900 |
| C  | 1.89016300  | 0.72347400  | -0.25289800 |
| C  | 3.95364800  | -1.17777900 | -0.21253300 |
| H  | 2.38817600  | -2.63345000 | -0.54042800 |
| C  | 3.20233800  | 1.14007800  | -0.05850100 |
| H  | 1.08211300  | 1.44598400  | -0.26614600 |
| C  | 4.21542200  | 0.18055300  | -0.04305400 |
| H  | 4.77257200  | -1.88633100 | -0.19710900 |
| H  | 3.45536500  | 2.18467700  | 0.07398000  |
| N  | 5.60460400  | 0.61958200  | 0.15481700  |

|   |             |             |             |
|---|-------------|-------------|-------------|
| O | 5.80956400  | 1.82555100  | 0.30088200  |
| O | 6.48341700  | -0.24253300 | 0.16431100  |
| C | -3.00378200 | 0.53494900  | 0.26354400  |
| C | -4.52965600 | 0.91674700  | -1.30967900 |
| C | -4.91579200 | -0.19005300 | -0.61418000 |
| H | -4.98859300 | 1.41997900  | -2.14592800 |
| H | -5.77403100 | -0.83291900 | -0.72985800 |
| N | -3.34469500 | 1.35419000  | -0.75192700 |
| N | -3.96701800 | -0.40474300 | 0.36492400  |
| C | -2.46803700 | 2.39835500  | -1.28875500 |
| H | -2.20558000 | 3.10650000  | -0.50152300 |
| H | -1.57090600 | 1.91409000  | -1.68134400 |
| H | -3.00401000 | 2.92161700  | -2.08168600 |
| C | -3.92632900 | -1.51129600 | 1.32523500  |
| H | -3.08232300 | -2.16144900 | 1.08135900  |
| H | -3.77228300 | -1.10298000 | 2.32642900  |
| H | -4.87442700 | -2.04753900 | 1.27594200  |

S19

0 imaginary frequency

H = -4785.543419

G = -4785.634778

Esol = -4785.924543

|    |            |             |             |
|----|------------|-------------|-------------|
| Se | 1.57398100 | -0.87476800 | -0.82547200 |
| N  | 0.56634400 | -0.88936400 | 0.65842200  |
| N  | 1.54234500 | 0.74611600  | -1.52018700 |
| S  | 0.01579100 | -2.41447500 | 0.95266300  |
| O  | 0.73771200 | -3.40054400 | 0.10669100  |
| S  | 1.95903900 | 2.05299900  | -0.58644700 |

|   |             |             |             |
|---|-------------|-------------|-------------|
| C | -1.70596200 | -2.38694700 | 0.40261400  |
| C | -2.07716600 | -1.59042600 | -0.68339100 |
| C | -2.62848500 | -3.21347800 | 1.04756700  |
| C | -3.38970100 | -1.62755800 | -1.14358300 |
| H | -1.34933100 | -0.93290200 | -1.14582600 |
| C | -3.94371800 | -3.25480000 | 0.59209400  |
| H | -2.31930900 | -3.80364300 | 1.90320400  |
| C | -4.29934300 | -2.46354700 | -0.49852600 |
| H | -3.71615900 | -1.02181200 | -1.97961500 |
| H | -4.69000600 | -3.88049600 | 1.06555600  |
| N | -5.69069900 | -2.50706100 | -0.98487400 |
| O | -6.47653900 | -3.24808500 | -0.39676300 |
| O | -5.97820500 | -1.80181300 | -1.95061000 |
| C | 0.40732500  | 2.87343700  | -0.16793400 |
| C | -0.47423600 | 2.26827600  | 0.73221800  |
| C | 0.13266500  | 4.11425500  | -0.74423900 |
| C | -1.65615700 | 2.92345900  | 1.06443800  |
| H | -0.23906700 | 1.29742000  | 1.15815200  |
| C | -1.05056900 | 4.77199300  | -0.41410700 |
| H | 0.84376300  | 4.55318400  | -1.43463800 |
| C | -1.92325900 | 4.16382600  | 0.48476400  |
| H | -2.36707100 | 2.49287000  | 1.75863200  |
| H | -1.30172800 | 5.73693600  | -0.83640100 |
| N | -3.17535400 | 4.85822100  | 0.83795400  |
| O | -3.38850100 | 5.95126700  | 0.31520500  |
| O | -3.93053800 | 4.30231100  | 1.63409500  |
| O | 2.57314600  | 1.63008600  | 0.69359600  |
| O | 2.70432500  | 2.97489400  | -1.45237700 |
| O | -0.00764100 | -2.63780800 | 2.40604500  |
| C | 3.41288200  | -0.96635600 | -0.00431400 |

|   |            |             |             |
|---|------------|-------------|-------------|
| C | 5.62507900 | -1.19024900 | -0.04021500 |
| C | 5.21651300 | -1.19629300 | 1.25812000  |
| H | 6.60836800 | -1.26712900 | -0.47647800 |
| H | 5.77999600 | -1.27281300 | 2.17455000  |
| N | 4.48932600 | -1.05276600 | -0.81215300 |
| N | 3.84140400 | -1.06370000 | 1.26522200  |
| C | 4.45007100 | -0.96703000 | -2.27786600 |
| H | 3.89912500 | -0.07187200 | -2.57435200 |
| H | 5.47509600 | -0.90924200 | -2.64403400 |
| H | 3.96694000 | -1.85693100 | -2.69025000 |
| C | 3.04225800 | -0.89255900 | 2.49323300  |
| H | 2.28165900 | -1.66811900 | 2.57425600  |
| H | 3.73364100 | -0.95559600 | 3.33449100  |
| H | 2.56862100 | 0.08724900  | 2.45639100  |

S2

0 imaginary frequency

H = -4645.365169

G = -4645.470359

Esol = -4646.112301

|    |             |             |             |
|----|-------------|-------------|-------------|
| Se | -2.15964400 | -0.45555100 | 0.32332800  |
| N  | -2.74450800 | 0.81240600  | -0.93154200 |
| S  | -3.00223100 | 2.40921900  | -0.39589300 |
| O  | -3.69533000 | 2.46459100  | 0.89850800  |
| O  | -3.54477000 | 3.11970400  | -1.55772300 |
| C  | -3.88528200 | -0.79226300 | 1.30620500  |
| C  | -4.96456700 | -1.20592200 | 0.36992100  |
| C  | -5.98141000 | -0.41242900 | 0.00334900  |
| H  | -4.87742800 | -2.20581000 | -0.05718300 |

|   |             |             |             |
|---|-------------|-------------|-------------|
| H | -6.04089100 | 0.58863300  | 0.43328400  |
| H | -3.56370900 | 0.50056300  | -1.45940300 |
| H | -3.59912100 | -1.59037200 | 2.00034000  |
| H | -4.11896700 | 0.11847300  | 1.85688600  |
| C | -7.07995200 | -0.80063200 | -0.94315200 |
| H | -8.05777400 | -0.76608400 | -0.44426600 |
| H | -7.13979400 | -0.10522200 | -1.79083600 |
| H | -6.93638900 | -1.81171400 | -1.33884200 |
| C | -1.29442100 | 2.89017000  | -0.11882700 |
| C | -0.53064300 | 3.31069800  | -1.20895200 |
| C | -0.75475600 | 2.76791100  | 1.16152300  |
| C | 0.81832400  | 3.59337900  | -1.02083200 |
| H | -0.98828400 | 3.40730500  | -2.18732700 |
| C | 0.59569400  | 3.04823300  | 1.35303700  |
| H | -1.38208800 | 2.45236000  | 1.98611900  |
| C | 1.35806500  | 3.43995100  | 0.25556200  |
| H | 1.45284800  | 3.91026500  | -1.83874900 |
| H | 1.06271500  | 2.95274200  | 2.32486600  |
| N | 2.80102700  | 3.66945800  | 0.44405900  |
| O | 3.46872000  | 3.95431600  | -0.54988900 |
| O | 3.25816400  | 3.54224000  | 1.57945100  |
| P | 1.40842500  | -0.95351900 | 0.01909100  |
| C | -0.30083700 | -3.21759300 | 3.87823600  |
| C | 0.66692800  | -2.03880700 | 4.04674800  |
| C | 0.79542700  | -1.22696600 | 2.74832100  |
| C | 1.22003600  | -2.10040200 | 1.54193600  |
| C | 0.22862200  | -3.27332300 | 1.38500700  |
| C | 0.10000000  | -4.09160000 | 2.68251000  |
| H | -1.31902100 | -2.82980500 | 3.71887700  |
| H | -0.33853900 | -3.81944500 | 4.79518900  |

|   |             |             |             |
|---|-------------|-------------|-------------|
| H | 1.65721200  | -2.42194200 | 4.33476400  |
| H | -0.16956900 | -0.75492500 | 2.50978800  |
| H | 2.20600300  | -2.53737000 | 1.76032000  |
| H | -0.76423400 | -2.88717700 | 1.10666600  |
| H | 0.53859700  | -3.93870000 | 0.57204700  |
| H | 1.06450900  | -4.57531900 | 2.89646900  |
| H | -0.62776500 | -4.90114300 | 2.53882300  |
| H | 0.33637900  | -1.38656700 | 4.86569600  |
| H | 1.50451600  | -0.40328900 | 2.89236400  |
| C | 5.78925600  | 0.85958500  | -0.10805400 |
| C | 5.22812300  | 0.25086800  | -1.39966700 |
| C | 3.70624100  | 0.04350100  | -1.31262100 |
| C | 3.29709900  | -0.81468500 | -0.09462100 |
| C | 3.88432700  | -0.20386700 | 1.19803900  |
| C | 5.40617000  | 0.00285500  | 1.10553600  |
| H | 5.38795400  | 1.87488100  | 0.02071900  |
| H | 6.88029400  | 0.95887600  | -0.17557100 |
| H | 5.71597100  | -0.71731000 | -1.58865200 |
| H | 3.21690500  | 1.02555100  | -1.24131600 |
| H | 3.72569300  | -1.82089400 | -0.21703700 |
| H | 3.40697600  | 0.76702300  | 1.39447300  |
| H | 3.66028600  | -0.84218500 | 2.06064600  |
| H | 5.90085200  | -0.97733000 | 1.03038100  |
| H | 5.76935200  | 0.46685800  | 2.03142700  |
| H | 5.46309000  | 0.89222100  | -2.25882400 |
| H | 3.34702200  | -0.41238800 | -2.24233900 |
| C | 0.89196000  | -3.12596200 | -4.22978100 |
| C | -0.12045800 | -2.06512300 | -3.77447200 |
| C | 0.43372700  | -1.19561000 | -2.63336500 |
| C | 0.92130900  | -2.05927100 | -1.44692100 |



|   |             |             |             |
|---|-------------|-------------|-------------|
| C | 1.92778400  | -3.13039900 | -1.90867500 |
| C | 1.35686400  | -3.99149700 | -3.04978100 |
| H | 1.76449500  | -2.62664400 | -4.67721200 |
| H | 0.45682300  | -3.75641800 | -5.01594700 |
| H | -1.03667200 | -2.56679100 | -3.42830600 |
| H | 1.25554600  | -0.57560400 | -3.01742000 |
| H | 0.02540800  | -2.57828300 | -1.07946400 |
| H | 2.84911900  | -2.64763400 | -2.26133200 |
| H | 2.21959400  | -3.77200900 | -1.06712600 |
| H | 0.50413300  | -4.57503800 | -2.67144800 |
| H | 2.10933100  | -4.71879800 | -3.38213200 |
| H | -0.41429900 | -1.42985900 | -4.62033700 |
| H | -0.34153800 | -0.50434100 | -2.28194300 |

S20

0 imaginary frequency

H = -4942.719190

G = -4942.824173

Esol = -4943.217482

|    |             |             |             |
|----|-------------|-------------|-------------|
| Se | 0.00872500  | -1.51498100 | 0.64702900  |
| N  | 1.32914000  | -1.05396900 | -0.49101700 |
| N  | -1.33486000 | -1.00959100 | -0.43883100 |
| S  | 2.76825800  | -1.45470100 | 0.20733700  |
| O  | 3.43028900  | -2.60235900 | -0.42942100 |
| O  | 2.62696300  | -1.47060400 | 1.69554300  |
| S  | -2.75773200 | -1.38763900 | 0.30183500  |
| O  | -2.58570800 | -1.35579100 | 1.78660500  |
| O  | -3.43536900 | -2.55667300 | -0.27975400 |
| C  | -0.39032900 | -4.47866300 | -0.17728100 |

|   |             |             |             |
|---|-------------|-------------|-------------|
| C | 0.29066600  | -4.01981800 | -1.23758600 |
| C | -0.32546400 | -3.42114200 | -2.46891800 |
| H | 1.37929500  | -4.08465500 | -1.23397200 |
| H | -1.40567600 | -3.31188700 | -2.32511000 |
| H | 0.07968300  | -2.41043800 | -2.60442100 |
| H | 0.11930400  | -4.93287500 | 0.66991800  |
| H | -1.47673700 | -4.43435100 | -0.13406100 |
| C | -0.03682400 | -4.26202300 | -3.72389200 |
| H | 1.04160000  | -4.37718400 | -3.88786000 |
| H | -0.46885700 | -5.26522300 | -3.63514100 |
| H | -0.46158800 | -3.78802000 | -4.61639900 |
| C | -3.75585500 | 0.04459400  | -0.15487200 |
| C | -4.14493300 | 0.94761800  | 0.83546900  |
| C | -4.14605000 | 0.21078700  | -1.48776700 |
| C | -4.92523600 | 2.04911300  | 0.48959600  |
| H | -3.84645000 | 0.77328100  | 1.86325700  |
| C | -4.91799300 | 1.31319300  | -1.84006300 |
| H | -3.85178400 | -0.51725300 | -2.23579600 |
| C | -5.29169900 | 2.21576000  | -0.84377000 |
| H | -5.25367000 | 2.76985600  | 1.22819200  |
| H | -5.23735000 | 1.48068200  | -2.86118300 |
| N | -6.10563400 | 3.38744300  | -1.21395300 |
| O | -6.42835400 | 3.50749500  | -2.39449000 |
| O | -6.40814600 | 4.17661400  | -0.31940300 |
| C | 3.76248900  | -0.00946100 | -0.21859000 |
| C | 4.14810000  | 0.18897300  | -1.54844800 |
| C | 4.14981200  | 0.87378000  | 0.79039800  |
| C | 4.91238600  | 1.30365400  | -1.87844100 |
| H | 3.85699800  | -0.52474800 | -2.31142100 |
| C | 4.92231100  | 1.98745100  | 0.46693100  |

|   |             |             |             |
|---|-------------|-------------|-------------|
| H | 3.85738400  | 0.67407400  | 1.81529000  |
| C | 5.28343500  | 2.18629500  | -0.86351900 |
| H | 5.22801900  | 1.49544600  | -2.89645000 |
| H | 5.24938400  | 2.69314100  | 1.22053300  |
| N | 6.08871200  | 3.37115400  | -1.20976100 |
| O | 6.40841000  | 3.51881200  | -2.38795200 |
| O | 6.38726500  | 4.14302900  | -0.29888700 |
| C | 0.05749800  | 0.16078600  | 1.77587100  |
| C | 0.09121000  | 2.26977800  | 2.45666800  |
| C | 0.09725700  | 1.47292400  | 3.56352800  |
| H | 0.10260900  | 3.34405600  | 2.35792700  |
| H | 0.11457000  | 1.71978500  | 4.61345700  |
| N | 0.06611500  | 1.43456000  | 1.35386900  |
| N | 0.07613000  | 0.16606500  | 3.11572900  |
| C | 0.04771100  | 1.84629600  | -0.05748300 |
| H | -0.84816700 | 1.44843900  | -0.53420900 |
| H | 0.05788600  | 2.93583700  | -0.09295600 |
| H | 0.91975600  | 1.43166700  | -0.56299900 |
| C | 0.06811800  | -1.05566300 | 3.92930200  |
| H | 0.09255300  | -0.76982100 | 4.98110800  |
| H | -0.84626900 | -1.61433100 | 3.71797600  |
| H | 0.95275300  | -1.64788700 | 3.68560500  |

S21

0 imaginary frequency

H = -4942.728004

G = -4942.831303

Esol = -4943.226209

|    |             |             |            |
|----|-------------|-------------|------------|
| Se | -0.08473000 | -1.43448500 | 0.23388200 |
|----|-------------|-------------|------------|

|   |             |             |             |
|---|-------------|-------------|-------------|
| N | -1.15350400 | -1.28305900 | -1.23625500 |
| N | 1.59979500  | -1.90118300 | -0.88371600 |
| S | -0.88120700 | 0.06751100  | -2.10999900 |
| O | 0.51040900  | 0.56554600  | -1.94512800 |
| S | 2.96703700  | -1.95997800 | 0.02697400  |
| C | -1.90365100 | 1.40127100  | -1.41836300 |
| C | -2.75716300 | 2.11321300  | -2.26221500 |
| C | -1.79179300 | 1.73485100  | -0.06443400 |
| C | -3.50762000 | 3.17168700  | -1.75159200 |
| H | -2.82503800 | 1.83100500  | -3.30692700 |
| C | -2.53284800 | 2.78977200  | 0.45402100  |
| H | -1.14268100 | 1.15763700  | 0.58416400  |
| C | -3.38263500 | 3.49174100  | -0.40182700 |
| H | -4.17972600 | 3.74556600  | -2.37773700 |
| H | -2.46948900 | 3.07592000  | 1.49646100  |
| N | -4.18120600 | 4.60007800  | 0.14741600  |
| O | -4.06875200 | 4.84221300  | 1.34957800  |
| O | -4.91636100 | 5.21276500  | -0.62480500 |
| C | 3.70724600  | -0.30866200 | 0.04601200  |
| C | 5.09688900  | -0.19794000 | -0.03504800 |
| C | 2.89336900  | 0.81723600  | 0.18825200  |
| C | 5.68650500  | 1.06190400  | 0.03997500  |
| H | 5.69936800  | -1.08996200 | -0.16435800 |
| C | 3.47563800  | 2.07821400  | 0.25832000  |
| H | 1.81713900  | 0.70885100  | 0.21043300  |
| C | 4.86434400  | 2.17667400  | 0.18931000  |
| H | 6.75999600  | 1.19133700  | -0.01882600 |
| H | 2.87787700  | 2.97560800  | 0.35581500  |
| N | 5.48516900  | 3.51171400  | 0.27302400  |
| O | 6.71037700  | 3.57699500  | 0.18883200  |

|   |             |             |             |
|---|-------------|-------------|-------------|
| O | 4.73926900  | 4.47783400  | 0.42647900  |
| O | 2.47198100  | -2.23167200 | 1.40097600  |
| O | 3.97673600  | -2.84885700 | -0.55417400 |
| O | -1.40402900 | -0.17020500 | -3.45914300 |
| C | -1.92756600 | -1.22631300 | 1.65455900  |
| C | -2.87895700 | -0.77608200 | 3.65663000  |
| C | -3.87811300 | -0.92333300 | 2.74865600  |
| H | -2.90733000 | -0.55891800 | 4.71358900  |
| H | -4.94986400 | -0.85770300 | 2.85909100  |
| N | -1.69054000 | -0.96684500 | 2.96643300  |
| N | -3.27459600 | -1.20174200 | 1.53070700  |
| C | -0.36322000 | -0.92898800 | 3.58334900  |
| H | -0.16689000 | 0.06487800  | 3.99566500  |
| H | -0.30186200 | -1.67148900 | 4.38339900  |
| H | 0.38449600  | -1.15995500 | 2.82657400  |
| C | -4.00439100 | -1.45486700 | 0.28520800  |
| H | -4.59818800 | -0.57532700 | 0.02146900  |
| H | -3.27289700 | -1.65385000 | -0.49876400 |
| H | -4.66721600 | -2.31443100 | 0.41911000  |
| H | 1.67671400  | -1.32636400 | -1.72585700 |
| C | -0.28392400 | -3.43524800 | 0.50503400  |
| C | -0.71962200 | -4.10235100 | -0.74366300 |
| C | -1.83480600 | -4.83686900 | -0.83140100 |
| H | -0.05639000 | -4.00295200 | -1.59863300 |
| H | -2.48266400 | -4.92140700 | 0.04407300  |
| H | -0.98478300 | -3.56752700 | 1.32921700  |
| C | -2.27298500 | -5.58784100 | -2.05308100 |
| H | -2.35193400 | -6.66437200 | -1.85007500 |
| H | -3.26663600 | -5.25551300 | -2.38242300 |
| H | 0.72962200  | -3.69208600 | 0.81409200  |

H                    -1.57514400    -5.44510600    -2.88354600

S22

0 imaginary frequency

H = -4942.747518

G = -4942.851208

Esol = -4943.246570

|    |             |             |             |
|----|-------------|-------------|-------------|
| Se | 0.02183100  | -1.37355500 | 0.36215600  |
| N  | -1.23467700 | -1.49054100 | -1.04044500 |
| N  | 1.68178200  | -1.80426400 | -0.94659000 |
| S  | -1.19964200 | -0.22630000 | -2.17972400 |
| O  | 0.15962400  | 0.31151900  | -2.30515200 |
| S  | 3.06538100  | -1.96356000 | -0.11982900 |
| C  | -2.18659700 | 1.08706700  | -1.42818000 |
| C  | -3.29269300 | 1.55753300  | -2.13807000 |
| C  | -1.79613900 | 1.66312200  | -0.21370800 |
| C  | -4.03222000 | 2.62156400  | -1.62358400 |
| H  | -3.56288000 | 1.09483000  | -3.08051000 |
| C  | -2.53521100 | 2.72173900  | 0.30376300  |
| H  | -0.95495500 | 1.25317600  | 0.33114000  |
| C  | -3.64035900 | 3.18306000  | -0.41139900 |
| H  | -4.89503800 | 3.01750400  | -2.14474500 |
| H  | -2.26997300 | 3.19330300  | 1.24186600  |
| N  | -4.42752600 | 4.30198400  | 0.14249400  |
| O  | -4.07173800 | 4.76434900  | 1.22511100  |
| O  | -5.39234000 | 4.69551200  | -0.50939600 |
| C  | 3.83505600  | -0.31922800 | -0.07273600 |
| C  | 5.21497700  | -0.19974200 | -0.24458400 |
| C  | 3.03756800  | 0.80263700  | 0.17506000  |

|   |             |             |             |
|---|-------------|-------------|-------------|
| C | 5.81147200  | 1.05698200  | -0.16056500 |
| H | 5.80417000  | -1.08631200 | -0.45132000 |
| C | 3.62399300  | 2.06030800  | 0.25895000  |
| H | 1.96550700  | 0.67931600  | 0.28308100  |
| C | 5.00526900  | 2.16473800  | 0.09295700  |
| H | 6.87847700  | 1.19001500  | -0.28965600 |
| H | 3.03885600  | 2.95271700  | 0.44267800  |
| N | 5.63076200  | 3.49468800  | 0.18548900  |
| O | 6.84797400  | 3.56745500  | 0.02220700  |
| O | 4.89805600  | 4.45495900  | 0.42402100  |
| O | 2.66335700  | -2.27031800 | 1.27385500  |
| O | 4.04425200  | -2.83435300 | -0.78260700 |
| O | -1.93521600 | -0.69596600 | -3.35868400 |
| C | -1.55873200 | -1.08923400 | 1.93157600  |
| C | -2.02620700 | -0.96368000 | 4.14214900  |
| C | -3.20530800 | -0.91598500 | 3.47348400  |
| H | -1.80802700 | -0.93362600 | 5.19854000  |
| H | -4.22100600 | -0.83853800 | 3.82998600  |
| N | -1.03001800 | -1.07212400 | 3.18523300  |
| N | -2.89800000 | -0.99393000 | 2.12107500  |
| C | 0.40400600  | -1.13805000 | 3.48438600  |
| H | 0.89736600  | -0.20467900 | 3.19975300  |
| H | 0.52696000  | -1.29355400 | 4.55724400  |
| H | 0.87410500  | -1.96220900 | 2.94408100  |
| C | -3.90725900 | -0.98158900 | 1.06616100  |
| H | -4.45475700 | -0.03492700 | 1.08693000  |
| H | -3.40260200 | -1.09743800 | 0.11095300  |
| H | -4.60224200 | -1.81282400 | 1.20984800  |
| H | 1.78040700  | -1.29259700 | -1.82330700 |
| C | -3.17378200 | -4.35988000 | -0.23510600 |

|   |             |             |             |
|---|-------------|-------------|-------------|
| C | -2.00336400 | -3.73473500 | -0.36708800 |
| C | -1.64349900 | -2.86115800 | -1.54259900 |
| H | -1.20884700 | -3.88430900 | 0.36115400  |
| H | -2.54008500 | -2.68236300 | -2.14226500 |
| H | -3.97779300 | -4.23693400 | -0.95853500 |
| C | -0.57945400 | -3.53943500 | -2.41592700 |
| H | -0.96884600 | -4.50060600 | -2.76866900 |
| H | -0.34766500 | -2.92315400 | -3.28949900 |
| H | -3.36390900 | -5.04204900 | 0.58937900  |
| H | 0.34157100  | -3.70828100 | -1.85385600 |

S23

0 imaginary frequency

H = -5171.919168

G = -5172.033944

Esol = -5172.487460

|   |             |             |             |
|---|-------------|-------------|-------------|
| N | 2.03779300  | 0.81045300  | 0.75578300  |
| N | -1.27766500 | 0.37360400  | 0.84512100  |
| S | 2.83128300  | 1.12897700  | -0.65903900 |
| O | 3.12201900  | 2.56751800  | -0.70501100 |
| O | 2.04175300  | 0.49829800  | -1.72802200 |
| S | -2.50923800 | 0.41881100  | 1.97286300  |
| O | -2.92723700 | 1.81864400  | 2.14222800  |
| O | -2.09089300 | -0.39150000 | 3.11556000  |
| C | 4.65661200  | 0.82936900  | 3.21302900  |
| C | 3.45186000  | 0.47382000  | 2.76764600  |
| C | 2.50327700  | 1.39744600  | 2.03911600  |
| H | 3.08046800  | -0.53832000 | 2.93164300  |
| H | 3.01715100  | 2.33122300  | 1.79084600  |



|   |             |             |             |
|---|-------------|-------------|-------------|
| H | -0.86846900 | -0.60424800 | 0.57193200  |
| H | 5.29505800  | 0.13458000  | 3.75203700  |
| H | 5.05243200  | 1.83151600  | 3.05811900  |
| C | 1.26903000  | 1.72815600  | 2.89378900  |
| H | 1.57863600  | 2.20644900  | 3.82854500  |
| H | 0.60331200  | 2.41192500  | 2.35579100  |
| H | 0.70230100  | 0.82464200  | 3.14058100  |
| C | -3.89505500 | -0.44212000 | 1.18914500  |
| C | -3.70561500 | -1.70733500 | 0.62092300  |
| C | -5.15147200 | 0.16763500  | 1.22128800  |
| C | -4.79880000 | -2.36136200 | 0.05764400  |
| H | -2.71708000 | -2.16135900 | 0.58900300  |
| C | -6.24615600 | -0.48945500 | 0.66375900  |
| H | -5.26291500 | 1.14237500  | 1.68311900  |
| C | -6.04790700 | -1.74168400 | 0.08706800  |
| H | -4.69639000 | -3.33784200 | -0.39955600 |
| H | -7.23725500 | -0.05293200 | 0.67079400  |
| C | 4.42314900  | 0.27042700  | -0.64965400 |
| C | 4.46216800  | -1.10664000 | -0.40452100 |
| C | 5.57955100  | 1.00128400  | -0.92557400 |
| C | 5.68922500  | -1.76223500 | -0.44276400 |
| H | 3.55339600  | -1.65334400 | -0.16312400 |
| C | 6.80804500  | 0.34553600  | -0.96747900 |
| H | 5.50959300  | 2.06867700  | -1.10215800 |
| C | 6.83944000  | -1.02599300 | -0.72716700 |
| H | 5.76762400  | -2.82569200 | -0.25432800 |
| H | 7.72877900  | 0.87447000  | -1.17966200 |
| N | -7.19969400 | -2.42921000 | -0.52543300 |
| N | 8.13729100  | -1.72296900 | -0.77026000 |
| O | -8.28595200 | -1.85127400 | -0.50311100 |

|    |             |             |             |
|----|-------------|-------------|-------------|
| O  | 9.13887000  | -1.05132400 | -1.01622000 |
| O  | -7.00287000 | -3.53384300 | -1.02863400 |
| O  | 8.14242900  | -2.93500600 | -0.55870800 |
| O  | -0.61249800 | -2.02939900 | 0.12333800  |
| C  | 0.52463600  | -2.55504000 | 0.39941400  |
| O  | 1.53472300  | -1.93168900 | 0.79852400  |
| C  | 0.61416800  | -4.06696400 | 0.21562100  |
| H  | -0.11419800 | -4.55999600 | 0.86904200  |
| H  | 0.35401400  | -4.33318800 | -0.81497100 |
| H  | 1.61611100  | -4.43296100 | 0.44784200  |
| H  | 1.72883700  | -0.18731800 | 0.80072400  |
| Se | -0.81409400 | 1.85159400  | -0.11695900 |
| C  | -2.09237300 | 1.67219000  | -1.52960500 |
| C  | -3.12418600 | 0.88876300  | -3.33161800 |
| C  | -3.86463200 | 1.92980700  | -2.84823200 |
| H  | -3.28767100 | 0.24395900  | -4.18086200 |
| H  | -4.78451200 | 2.36635900  | -3.20471600 |
| N  | -2.02791400 | 0.75009400  | -2.51169200 |
| N  | -3.21571900 | 2.39980000  | -1.72682400 |
| C  | -0.96510400 | -0.26497400 | -2.63484700 |
| H  | -1.11216200 | -1.05421400 | -1.89141400 |
| H  | -1.01029600 | -0.67394500 | -3.64487000 |
| H  | 0.00529600  | 0.20280200  | -2.45529500 |
| C  | -3.65387400 | 3.51316500  | -0.87726300 |
| H  | -3.24316600 | 4.45456200  | -1.25162100 |
| H  | -4.74395700 | 3.55514200  | -0.89732400 |
| H  | -3.30579500 | 3.32926100  | 0.14059000  |

0 imaginary frequency

H = -5171.924002

G = -5172.038877

Esol = -5172.492862

|   |             |             |             |
|---|-------------|-------------|-------------|
| N | 0.55736400  | 2.46942000  | 0.56678000  |
| N | 0.22050800  | -0.94974700 | -0.93271200 |
| S | -0.63712800 | 3.61084800  | 0.33755500  |
| O | -0.59149100 | 4.08989200  | -1.04837500 |
| O | -0.64901400 | 4.52726300  | 1.48042300  |
| S | 1.10572500  | -2.33889300 | -0.93279800 |
| O | 1.25529800  | -2.71949200 | -2.34933000 |
| O | 0.58099700  | -3.33741100 | 0.02482500  |
| C | 3.10213100  | 3.90732100  | 0.28587800  |
| C | 2.73452300  | 3.36133000  | 1.44399800  |
| C | 1.47709100  | 2.56284700  | 1.71838200  |
| H | 3.38469700  | 3.46180800  | 2.31410400  |
| H | 0.92102700  | 3.07794100  | 2.50952800  |
| H | 0.06545400  | 0.13226800  | -2.17146200 |
| H | 4.03804800  | 4.45293700  | 0.20374900  |
| H | 2.50364800  | 3.83081200  | -0.61699900 |
| C | 1.81673300  | 1.14463800  | 2.21017700  |
| H | 2.44229200  | 1.19594100  | 3.10816300  |
| H | 0.90614400  | 0.58648700  | 2.45044400  |
| H | 2.36928700  | 0.59171800  | 1.44526500  |
| C | 2.76181000  | -1.90628300 | -0.35083900 |
| C | 3.39071200  | -0.75079100 | -0.82730200 |
| C | 3.40698400  | -2.77387200 | 0.53304600  |
| C | 4.68730200  | -0.46104100 | -0.41089400 |
| H | 2.86734900  | -0.06510200 | -1.48639900 |
| C | 4.70568100  | -2.48983700 | 0.94890500  |

|    |             |             |             |
|----|-------------|-------------|-------------|
| H  | 2.88769500  | -3.65635800 | 0.88932100  |
| C  | 5.32427800  | -1.33813200 | 0.46735600  |
| H  | 5.20172500  | 0.42988700  | -0.74871400 |
| H  | 5.23885500  | -3.13830800 | 1.63295000  |
| C  | -2.13218000 | 2.60427300  | 0.47299500  |
| C  | -2.57703300 | 2.22753400  | 1.74336200  |
| C  | -2.76490500 | 2.15144100  | -0.68425600 |
| C  | -3.62325800 | 1.31966000  | 1.85988800  |
| H  | -2.09625600 | 2.63201200  | 2.62752400  |
| C  | -3.83462500 | 1.26633800  | -0.57546100 |
| H  | -2.40344800 | 2.46922300  | -1.65523800 |
| C  | -4.21859000 | 0.83640100  | 0.69295800  |
| H  | -3.98001500 | 0.98423800  | 2.82582900  |
| H  | -4.34832500 | 0.88639000  | -1.44986400 |
| N  | 6.69451300  | -1.03126700 | 0.91140100  |
| N  | -5.24965100 | -0.20326200 | 0.80521400  |
| O  | 7.22924200  | -1.81275100 | 1.69831500  |
| O  | -5.44950100 | -0.69489500 | 1.92007300  |
| O  | 7.22394200  | -0.01160500 | 0.47097400  |
| O  | -5.83503900 | -0.55034400 | -0.21952700 |
| O  | -0.16581700 | 0.78824000  | -2.92475700 |
| C  | 0.72198000  | 1.77440900  | -2.95621200 |
| O  | 1.63232700  | 1.89132600  | -2.13853400 |
| C  | 0.48680100  | 2.77298800  | -4.06144700 |
| H  | -0.05730600 | 3.62291400  | -3.63353700 |
| H  | 1.44695800  | 3.14207000  | -4.42872700 |
| H  | -0.09781700 | 2.34344100  | -4.87734800 |
| H  | 0.97641200  | 2.17353200  | -0.32528000 |
| Se | -0.93453900 | -0.71193000 | 0.46478200  |
| C  | -2.22859000 | -2.06592600 | 0.07227300  |

|   |             |             |             |
|---|-------------|-------------|-------------|
| C | -3.62186300 | -3.46162000 | -0.96054800 |
| C | -3.70736200 | -3.70994400 | 0.37278000  |
| H | -4.12506100 | -3.91887000 | -1.79754800 |
| H | -4.31162900 | -4.41087600 | 0.92609100  |
| N | -2.71430200 | -2.43209000 | -1.13363000 |
| N | -2.83092800 | -2.84339600 | 1.00015500  |
| C | -2.32228400 | -1.86248300 | -2.42739400 |
| H | -2.25916000 | -0.77801800 | -2.33949600 |
| H | -1.34633700 | -2.24774500 | -2.73100100 |
| H | -3.08823400 | -2.13208300 | -3.15609600 |
| C | -2.57438500 | -2.77109600 | 2.43651900  |
| H | -3.27893300 | -2.08071000 | 2.90846100  |
| H | -2.68769600 | -3.76748700 | 2.86666300  |
| H | -1.54838600 | -2.42201900 | 2.57278100  |

S25

0 imaginary frequency

H = -6147.553838

G = -6147.626677

Esol = -6147.816959

|    |             |             |             |
|----|-------------|-------------|-------------|
| Se | 1.15763500  | -1.90098400 | 0.19237400  |
| N  | -0.02245600 | -1.01516600 | -0.82352700 |
| S  | -0.44718300 | 0.48187700  | -0.25659900 |
| O  | 0.04982100  | 0.81118600  | 1.10256100  |
| O  | -0.20197600 | 1.49063600  | -1.31499800 |
| C  | -2.24019200 | 0.33208200  | -0.13407600 |
| C  | -2.83710200 | 0.27268200  | 1.12629800  |
| C  | -3.00450500 | 0.27475600  | -1.30352000 |
| C  | -4.22084200 | 0.14968300  | 1.22500700  |

|    |             |             |             |
|----|-------------|-------------|-------------|
| H  | -2.21599700 | 0.33302800  | 2.01292000  |
| C  | -4.38641700 | 0.14624900  | -1.21237800 |
| H  | -2.51805500 | 0.33778300  | -2.27042800 |
| C  | -4.97174600 | 0.08563000  | 0.05279500  |
| H  | -4.72180300 | 0.10543600  | 2.18405400  |
| H  | -5.01288400 | 0.09730300  | -2.09426500 |
| N  | -6.43427900 | -0.04447000 | 0.15342900  |
| O  | -7.07810400 | -0.09604500 | -0.89446900 |
| O  | -6.92876300 | -0.09415300 | 1.27990100  |
| C  | 3.19044700  | 0.63649800  | 0.09311500  |
| C  | 2.90485600  | 2.38148500  | 1.44373500  |
| C  | 2.80424700  | 2.82693200  | 0.16181200  |
| H  | 2.80031600  | 2.90265900  | 2.38176600  |
| H  | 2.60067100  | 3.81034100  | -0.23032400 |
| N  | 3.15883600  | 1.02874200  | 1.38658400  |
| N  | 2.98089000  | 1.73758400  | -0.66479700 |
| C  | 3.16323400  | 0.10008300  | 2.51485500  |
| H  | 3.23756400  | 0.67362400  | 3.43914800  |
| H  | 2.23311100  | -0.47437100 | 2.48186800  |
| H  | 4.01517500  | -0.57578900 | 2.41752500  |
| C  | 2.83175400  | 1.75881800  | -2.12219800 |
| H  | 1.81827000  | 2.08987900  | -2.35397000 |
| H  | 3.58661800  | 2.41636400  | -2.56054100 |
| H  | 2.96259400  | 0.73867200  | -2.48180700 |
| Se | 3.38525300  | -1.12237400 | -0.53469200 |

S26

0 imaginary frequency

H = -7187.142757

G = -7187.238521

Esol = -7187.526226

|    |             |             |             |
|----|-------------|-------------|-------------|
| Se | 1.34239000  | -0.05509800 | -1.47561500 |
| N  | 1.08092900  | 1.52720600  | -2.16586000 |
| N  | 0.52884400  | -0.13132900 | 0.11460100  |
| S  | 0.98823800  | 2.90687900  | -1.24695900 |
| O  | 0.91693100  | 4.01368800  | -2.20251200 |
| O  | 2.00975700  | 2.94417500  | -0.18226000 |
| S  | 0.24139800  | -1.68124100 | 0.59855100  |
| O  | 0.32849200  | -1.71021900 | 2.06692600  |
| O  | 1.05774300  | -2.64780200 | -0.18468400 |
| C  | -1.48063900 | -2.00463200 | 0.17246000  |
| C  | -1.77745700 | -2.98904000 | -0.77110500 |
| C  | -2.48877400 | -1.26132500 | 0.79447200  |
| C  | -3.10842400 | -3.23862900 | -1.10014600 |
| H  | -0.97338700 | -3.55342200 | -1.22933600 |
| C  | -3.81946600 | -1.49877500 | 0.46267500  |
| H  | -2.23391900 | -0.50584600 | 1.52924200  |
| C  | -4.10362700 | -2.48839500 | -0.47911800 |
| H  | -3.38274700 | -3.99783400 | -1.82193200 |
| H  | -4.62535100 | -0.92855700 | 0.90927000  |
| N  | -5.51192100 | -2.75464600 | -0.83086800 |
| O  | -6.37590500 | -2.09980800 | -0.25273800 |
| O  | -5.73184300 | -3.61713500 | -1.68061900 |
| C  | -0.61067100 | 2.80797600  | -0.41345100 |
| C  | -0.73630700 | 3.36972700  | 0.85762800  |
| C  | -1.69788800 | 2.21579300  | -1.05858900 |
| C  | -1.96797000 | 3.32974800  | 1.50537600  |
| H  | 0.12870800  | 3.81469000  | 1.33652200  |
| C  | -2.92915000 | 2.16186900  | -0.41382700 |

|    |             |             |             |
|----|-------------|-------------|-------------|
| H  | -1.57297700 | 1.78660700  | -2.04667700 |
| C  | -3.04028400 | 2.71360700  | 0.86259000  |
| H  | -2.10559000 | 3.74944400  | 2.49424000  |
| H  | -3.79213300 | 1.69765600  | -0.87441800 |
| N  | -4.32783500 | 2.61591700  | 1.56825500  |
| O  | -4.45134000 | 3.23451600  | 2.62383800  |
| O  | -5.20262100 | 1.90878700  | 1.06432900  |
| C  | 3.69005800  | -0.83951800 | 0.80404300  |
| C  | 3.39199900  | -1.45376600 | 2.92232300  |
| C  | 3.77864400  | -2.55627800 | 2.22043600  |
| H  | 3.12247600  | -1.33900500 | 3.95987900  |
| H  | 3.91341700  | -3.57941100 | 2.53353100  |
| N  | 3.34194500  | -0.40250700 | 2.03840900  |
| N  | 3.96047400  | -2.16388200 | 0.91474700  |
| C  | 2.90452100  | 0.95756800  | 2.37186100  |
| H  | 3.52349400  | 1.34185200  | 3.18626100  |
| H  | 3.00396600  | 1.58185900  | 1.48454500  |
| H  | 1.85445200  | 0.91937700  | 2.66589800  |
| C  | 4.24341600  | -3.06053600 | -0.20543100 |
| H  | 3.32660100  | -3.59574200 | -0.46157400 |
| H  | 4.56053300  | -2.44944900 | -1.05040500 |
| H  | 5.03642400  | -3.75482300 | 0.07926900  |
| Se | 3.80870400  | 0.20701300  | -0.73045000 |

S27

0 imaginary frequency

H = -7344.313201

G = -7344.422529

Esol = -7344.814132



|    |             |             |             |
|----|-------------|-------------|-------------|
| Se | -1.64440700 | 0.01723300  | 0.63854100  |
| N  | -2.28216800 | 0.67643700  | -0.82611500 |
| N  | -0.19192700 | 0.88508100  | 1.12823000  |
| S  | -1.83537100 | 2.01810400  | -1.68885900 |
| O  | -2.29941000 | 3.24671300  | -1.02848700 |
| O  | -2.29105400 | 1.72813800  | -3.05832400 |
| S  | 0.44881800  | 0.20245100  | 2.51297400  |
| O  | -0.44671600 | -0.86484800 | 3.02025000  |
| O  | 0.86919500  | 1.28350200  | 3.40613600  |
| C  | -3.58035300 | 1.14607900  | 2.65816300  |
| C  | -3.28764200 | 2.33923200  | 2.11325800  |
| C  | -2.18068900 | 3.24763500  | 2.55495000  |
| H  | -3.88012300 | 2.69495400  | 1.26987500  |
| H  | -1.59788200 | 2.77836900  | 3.35520300  |
| H  | -1.49646400 | 3.39130400  | 1.70799600  |
| H  | -4.41671800 | 0.54969300  | 2.29966200  |
| H  | -3.01992400 | 0.74824500  | 3.50196000  |
| C  | -2.70469300 | 4.62196400  | 3.00872300  |
| H  | -1.87184300 | 5.27537000  | 3.28984600  |
| H  | -3.26400700 | 5.11665600  | 2.20609300  |
| H  | -3.36929800 | 4.52703100  | 3.87481100  |
| C  | 1.93997500  | -0.59794200 | 1.89624300  |
| C  | 1.92770600  | -1.97503600 | 1.66137200  |
| C  | 3.07548500  | 0.17903700  | 1.64890000  |
| C  | 3.07264400  | -2.58725300 | 1.15550100  |
| H  | 1.03469800  | -2.55154100 | 1.87084200  |
| C  | 4.22195300  | -0.42955500 | 1.14471300  |
| H  | 3.06036300  | 1.24284600  | 1.85895500  |
| C  | 4.19732100  | -1.80382700 | 0.90817500  |
| H  | 3.10883500  | -3.65199300 | 0.96164300  |

|   |             |             |             |
|---|-------------|-------------|-------------|
| H | 5.11962600  | 0.13614600  | 0.92866000  |
| N | 5.41315300  | -2.45866500 | 0.38649700  |
| O | 6.42167300  | -1.76893000 | 0.26183600  |
| O | 5.33921000  | -3.65626300 | 0.11270000  |
| C | -0.03395400 | 2.10044300  | -1.72427100 |
| C | 0.56140100  | 3.35906900  | -1.63465900 |
| C | 0.72500500  | 0.93972100  | -1.88014900 |
| C | 1.94810200  | 3.46477700  | -1.70608900 |
| H | -0.05727400 | 4.23781700  | -1.49287000 |
| C | 2.11040300  | 1.03940700  | -1.94309800 |
| H | 0.25725200  | -0.03833800 | -1.91539100 |
| C | 2.69832500  | 2.30032000  | -1.85156600 |
| H | 2.44916600  | 4.42223800  | -1.63658700 |
| H | 2.73742900  | 0.16264800  | -2.04543600 |
| N | 4.16721500  | 2.40129800  | -1.87983200 |
| O | 4.66309700  | 3.52618500  | -1.90533700 |
| O | 4.81123300  | 1.35122600  | -1.86564100 |
| C | -2.38240800 | -2.58418100 | -1.06578400 |
| C | -4.56015300 | -3.03371200 | -0.80109000 |
| C | -4.37185500 | -2.61742100 | -2.08245300 |
| H | -5.45423800 | -3.34199600 | -0.28276100 |
| H | -5.07292300 | -2.48593100 | -2.89134800 |
| N | -3.32429000 | -3.00893100 | -0.18182300 |
| N | -3.02558900 | -2.34660800 | -2.23402900 |
| C | -3.03495900 | -3.36651300 | 1.20744900  |
| H | -3.94737100 | -3.75493900 | 1.66147200  |
| H | -2.24841100 | -4.12309600 | 1.23471900  |
| H | -2.69398700 | -2.48185100 | 1.74863100  |
| C | -2.40356700 | -1.78096500 | -3.43338900 |
| H | -2.43052900 | -0.68809000 | -3.38565300 |

|    |             |             |             |
|----|-------------|-------------|-------------|
| H  | -1.37077500 | -2.12739100 | -3.47857600 |
| H  | -2.95098300 | -2.13616200 | -4.30846000 |
| Se | -0.58796500 | -2.34089700 | -0.66277800 |

S28

0 imaginary frequency

H = -7344.337229

G = -7344.445421

Esol = -7344.838628

|    |             |             |             |
|----|-------------|-------------|-------------|
| Se | 0.19065700  | -1.25109800 | -0.03668300 |
| N  | 1.51273300  | 0.17123300  | -0.54331600 |
| N  | -1.33906900 | -0.33796000 | -0.07132800 |
| S  | 1.91649000  | 1.13887400  | 0.75957600  |
| O  | 1.66367800  | 0.35396000  | 1.97617500  |
| O  | 1.34195300  | 2.48386300  | 0.60143100  |
| S  | -1.80738100 | 0.28074700  | -1.51445000 |
| O  | -2.78823700 | -0.56596400 | -2.22510300 |
| O  | -0.64145600 | 0.73583100  | -2.32203000 |
| C  | 0.51487800  | -2.16791900 | -1.81841300 |
| C  | 1.64530900  | -3.11439100 | -1.62914100 |
| C  | 2.90485800  | -2.85249900 | -2.00320300 |
| H  | 1.40931100  | -4.05884000 | -1.13912100 |
| H  | 3.12018000  | -1.89503500 | -2.47872200 |
| H  | -0.44331200 | -2.65402400 | -2.00165100 |
| H  | 0.70365200  | -1.36921700 | -2.53379100 |
| C  | 4.06346100  | -3.78771500 | -1.83435900 |
| H  | 4.85988900  | -3.32263100 | -1.23800900 |
| H  | 3.76570500  | -4.71931400 | -1.34259200 |
| H  | 4.50948600  | -4.03969600 | -2.80569100 |

|   |             |             |             |
|---|-------------|-------------|-------------|
| C | -2.69440600 | 1.74959000  | -0.95841000 |
| C | -2.02586500 | 2.72289600  | -0.20948900 |
| C | -4.02543100 | 1.90823100  | -1.34516300 |
| C | -2.71280300 | 3.87190200  | 0.17152900  |
| H | -0.98783000 | 2.59128300  | 0.07953800  |
| C | -4.71574300 | 3.05758700  | -0.96602200 |
| H | -4.50509200 | 1.13580200  | -1.93537900 |
| C | -4.04621900 | 4.01742500  | -0.21126600 |
| H | -2.23369500 | 4.64801800  | 0.75516800  |
| H | -5.74975000 | 3.21914500  | -1.24404800 |
| N | -4.77617200 | 5.23112500  | 0.19904700  |
| O | -4.16464300 | 6.06906100  | 0.85968500  |
| O | -5.95441400 | 5.33084100  | -0.14208500 |
| C | 3.70241000  | 1.30834400  | 0.59283300  |
| C | 4.52758500  | 0.29317200  | 1.08385100  |
| C | 4.22598000  | 2.45118300  | -0.01345100 |
| C | 5.90715900  | 0.41594000  | 0.95203300  |
| H | 4.09247900  | -0.57008600 | 1.57511600  |
| C | 5.60710200  | 2.57764900  | -0.14767500 |
| H | 3.55957900  | 3.23266300  | -0.36126000 |
| C | 6.42117500  | 1.55529600  | 0.33381000  |
| H | 6.58426000  | -0.34418400 | 1.32124000  |
| H | 6.05573000  | 3.44803300  | -0.60999300 |
| N | 7.88417000  | 1.68503200  | 0.19074800  |
| O | 8.31486300  | 2.70194000  | -0.34943500 |
| O | 8.58054000  | 0.76619000  | 0.61885900  |
| H | 1.08067700  | 0.73445500  | -1.28901600 |
| C | -2.74704700 | -2.84832800 | 1.06026500  |
| C | -4.74739600 | -1.84337200 | 1.13560800  |
| C | -4.05779500 | -1.46814500 | 2.24417100  |

|    |             |             |             |
|----|-------------|-------------|-------------|
| H  | -5.73863800 | -1.58442800 | 0.79905200  |
| H  | -4.33100400 | -0.81718000 | 3.05939000  |
| N  | -3.93122800 | -2.69928100 | 0.41577300  |
| N  | -2.83060800 | -2.10402900 | 2.19420200  |
| C  | -4.22616800 | -3.25134000 | -0.90391600 |
| H  | -3.71690700 | -4.21104000 | -0.99815900 |
| H  | -5.30573800 | -3.38992800 | -0.99349700 |
| H  | -3.86373500 | -2.56235200 | -1.67142700 |
| C  | -1.71637400 | -1.91268000 | 3.11624400  |
| H  | -2.08878800 | -1.44233800 | 4.02749000  |
| H  | -1.27252700 | -2.88431100 | 3.34102000  |
| H  | -0.96131800 | -1.27607600 | 2.64887700  |
| Se | -1.29575800 | -3.84620200 | 0.51840600  |

S29

0 imaginary frequency

H = -7344.352474

G = -7344.460096

Esol = -7344.854849

|    |             |             |             |
|----|-------------|-------------|-------------|
| Se | 1.09909800  | -1.60641500 | 0.28553700  |
| N  | -0.89579800 | -1.86609400 | 0.34705000  |
| N  | 1.03326000  | 0.08868300  | 1.08231400  |
| S  | -1.67825500 | -2.03119800 | -1.12513600 |
| O  | -1.52916200 | -3.37541900 | -1.70198800 |
| O  | -1.32072100 | -0.85850800 | -1.93344200 |
| S  | 1.57239800  | 1.36895400  | 0.06414600  |
| O  | 1.79627000  | 0.83737300  | -1.28031000 |
| O  | 2.64245500  | 2.10610500  | 0.75749700  |
| C  | 2.05891400  | -1.82433600 | 3.92194400  |

|   |             |             |             |
|---|-------------|-------------|-------------|
| C | 1.15737000  | -1.10664100 | 3.25114900  |
| C | 1.49226000  | 0.17212500  | 2.52474800  |
| H | 0.10124000  | -1.37397800 | 3.28283700  |
| H | 2.57867400  | 0.29950700  | 2.52307900  |
| H | 1.77288300  | -2.69472600 | 4.50616300  |
| H | 3.11777100  | -1.57873100 | 3.89466600  |
| C | 0.81382100  | 1.34695900  | 3.24522000  |
| H | 1.09195400  | 2.30930300  | 2.81204100  |
| H | -0.27615400 | 1.24378800  | 3.21386200  |
| H | 1.13041200  | 1.34845500  | 4.29311000  |
| C | 0.16792900  | 2.49367800  | -0.06669500 |
| C | -0.94022000 | 2.10787900  | -0.82622300 |
| C | 0.25329800  | 3.75476200  | 0.52554700  |
| C | -2.00095100 | 2.99949800  | -0.96681100 |
| H | -0.97278800 | 1.13589300  | -1.30930500 |
| C | -0.80611000 | 4.64828400  | 0.38208200  |
| H | 1.14294500  | 4.03404100  | 1.07804500  |
| C | -1.91741800 | 4.25057000  | -0.35650900 |
| H | -2.87829700 | 2.74250500  | -1.54750600 |
| H | -0.78049400 | 5.63629400  | 0.82440200  |
| N | -3.04283700 | 5.19315500  | -0.50614700 |
| O | -4.02092100 | 4.81384000  | -1.14738100 |
| O | -2.93339400 | 6.29853900  | 0.02211700  |
| C | -3.40446900 | -1.86867800 | -0.62037100 |
| C | -3.82326900 | -0.71668900 | 0.05348100  |
| C | -4.29936800 | -2.88693100 | -0.95076200 |
| C | -5.16085500 | -0.58393800 | 0.41002700  |
| H | -3.10766000 | 0.05848500  | 0.30509700  |
| C | -5.64169600 | -2.75795900 | -0.59712100 |
| H | -3.94019700 | -3.76478500 | -1.47614300 |

|    |             |             |             |
|----|-------------|-------------|-------------|
| C  | -6.04652900 | -1.60975400 | 0.07778600  |
| H  | -5.52691000 | 0.28968500  | 0.93485000  |
| H  | -6.36843000 | -3.52500200 | -0.83408700 |
| N  | -7.46493600 | -1.47377000 | 0.46053600  |
| O  | -8.22785800 | -2.38738300 | 0.15141400  |
| O  | -7.79518900 | -0.45598000 | 1.06653300  |
| H  | -1.05412900 | -2.71681600 | 0.89178000  |
| C  | 4.61005100  | -0.59437600 | -0.75261100 |
| C  | 4.97916000  | 0.18352400  | -2.82248700 |
| C  | 5.63582500  | 0.99712100  | -1.95559800 |
| H  | 4.89642000  | 0.21652000  | -3.89711200 |
| H  | 6.23904000  | 1.87412600  | -2.12818900 |
| N  | 4.36175100  | -0.80012500 | -2.07177000 |
| N  | 5.40681700  | 0.50477000  | -0.68178400 |
| C  | 3.48100000  | -1.84897600 | -2.57296600 |
| H  | 3.46988600  | -1.80400000 | -3.66275100 |
| H  | 3.85072600  | -2.82188800 | -2.23893200 |
| H  | 2.47649300  | -1.68907500 | -2.17709400 |
| C  | 5.84695500  | 1.11499700  | 0.56786900  |
| H  | 6.68757700  | 1.77803500  | 0.35418000  |
| H  | 5.02071500  | 1.67846400  | 1.00819200  |
| H  | 6.15896300  | 0.32816200  | 1.25659400  |
| Se | 4.00235100  | -1.61093700 | 0.66596100  |

S3

0 imaginary frequency

H = -6889.768674

G = -6889.865679

Esol = -6890.402438

|    |             |             |             |
|----|-------------|-------------|-------------|
| Se | -1.08834300 | -0.74188400 | 0.60233100  |
| N  | -1.58256900 | 0.97148800  | 0.83335100  |
| S  | -2.47943200 | 1.60569400  | -0.41287600 |
| O  | -2.77799600 | 2.99580300  | -0.03598400 |
| O  | -1.86669800 | 1.33048300  | -1.73298200 |
| C  | -4.05551000 | 0.71633900  | -0.41234700 |
| C  | -5.10296600 | 1.18932800  | 0.38257200  |
| C  | -4.18956800 | -0.45674200 | -1.16230500 |
| C  | -6.30182700 | 0.48460400  | 0.43365800  |
| H  | -4.97396500 | 2.11071400  | 0.93999100  |
| C  | -5.38482500 | -1.16916400 | -1.11327900 |
| H  | -3.37217000 | -0.78624200 | -1.79207200 |
| C  | -6.41963000 | -0.68857000 | -0.31194600 |
| H  | -7.13781200 | 0.82462700  | 1.03215600  |
| H  | -5.52899500 | -2.07865500 | -1.68314700 |
| N  | -7.68298800 | -1.44042000 | -0.25872200 |
| O  | -7.76472300 | -2.47345100 | -0.92430500 |
| O  | -8.58596100 | -0.99558800 | 0.45043700  |
| Se | 0.61903500  | -0.81389000 | -1.12268000 |
| P  | 2.50997200  | -0.05166600 | -0.19150400 |
| C  | 1.69328300  | -1.48960600 | 4.24212300  |
| C  | 2.00211800  | -0.00290300 | 4.02366900  |
| C  | 1.80957900  | 0.41012200  | 2.55465500  |
| C  | 2.66698200  | -0.47778500 | 1.62082600  |
| C  | 2.37074700  | -1.98108400 | 1.84620100  |
| C  | 2.55331400  | -2.36665100 | 3.32296300  |
| H  | 0.63134800  | -1.67328900 | 4.02820600  |
| H  | 1.85930300  | -1.76312000 | 5.29117300  |
| H  | 3.03800600  | 0.20466000  | 4.33267200  |
| H  | 0.75695600  | 0.31000000  | 2.27930800  |



|   |            |             |             |
|---|------------|-------------|-------------|
| H | 3.72702000 | -0.29092800 | 1.84670900  |
| H | 1.34066500 | -2.18456900 | 1.53630400  |
| H | 3.01888400 | -2.60106100 | 1.21541900  |
| H | 3.61262400 | -2.26226900 | 3.60167400  |
| H | 2.29935500 | -3.42596500 | 3.45110500  |
| H | 1.35667700 | 0.61995400  | 4.65405100  |
| H | 2.07456900 | 1.46472900  | 2.43551500  |
| C | 2.46776700 | 4.70304500  | -0.01587500 |
| C | 1.34162100 | 3.97441600  | -0.76088900 |
| C | 1.24092000 | 2.49832900  | -0.34843200 |
| C | 2.59796300 | 1.78530900  | -0.52931200 |
| C | 3.75002700 | 2.51162400  | 0.20205500  |
| C | 3.81283800 | 3.99219500  | -0.21944500 |
| H | 2.23349500 | 4.73804100  | 1.05814100  |
| H | 2.54076300 | 5.74404300  | -0.35363100 |
| H | 1.52102800 | 4.03833900  | -1.84437600 |
| H | 0.90423500 | 2.43221900  | 0.69185700  |
| H | 2.82804600 | 1.79712700  | -1.60679000 |
| H | 3.59684400 | 2.45625200  | 1.28705100  |
| H | 4.71401800 | 2.03254500  | -0.00846500 |
| H | 4.09907300 | 4.05076800  | -1.27975500 |
| H | 4.60813600 | 4.49270200  | 0.34700600  |
| H | 0.37403000 | 4.45343100  | -0.57576600 |
| H | 0.48175700 | 1.99336300  | -0.95005900 |
| C | 6.12752000 | -2.70929500 | -1.87593600 |
| C | 6.43631400 | -1.39515800 | -1.14676500 |
| C | 5.25112800 | -0.93538200 | -0.27879600 |
| C | 3.96785200 | -0.79988400 | -1.13164400 |
| C | 3.64583100 | -2.13208700 | -1.84575900 |
| C | 4.83824500 | -2.59427900 | -2.70010100 |

|   |            |             |             |
|---|------------|-------------|-------------|
| H | 6.01714600 | -3.51653100 | -1.13726200 |
| H | 6.96805300 | -2.98982000 | -2.52193300 |
| H | 6.67027100 | -0.61231900 | -1.88259600 |
| H | 5.08601900 | -1.67425900 | 0.51603100  |
| H | 4.16104100 | -0.04706100 | -1.90993800 |
| H | 3.40432500 | -2.90135500 | -1.10068700 |
| H | 2.75580900 | -2.02351900 | -2.47328500 |
| H | 4.99214700 | -1.87813900 | -3.52047400 |
| H | 4.59527300 | -3.55544300 | -3.16862200 |
| H | 7.32568300 | -1.50508600 | -0.51431000 |
| H | 5.50173400 | 0.01052500  | 0.21415400  |

S30

0 imaginary frequency

H = -7573.490756

G = -7573.609446

Esol = -7574.061766

|   |             |             |             |
|---|-------------|-------------|-------------|
| N | -2.20575800 | -1.92087600 | 0.55663200  |
| N | 0.61371400  | -0.76146800 | 0.09990100  |
| S | -3.76206600 | -1.62609900 | -0.11476400 |
| O | -4.81703000 | -2.26900700 | 0.67533000  |
| O | -3.66472500 | -1.88598400 | -1.55711400 |
| S | 1.74531700  | -1.96857800 | 0.39286600  |
| O | 1.96461100  | -2.70945700 | -0.85395300 |
| O | 1.43518000  | -2.69455300 | 1.63169100  |
| C | -1.15295200 | -4.79384700 | -0.97696900 |
| C | -2.11967600 | -4.30327500 | -0.20143800 |
| C | -1.86824500 | -3.34820600 | 0.93807000  |
| H | -3.15614100 | -4.59473700 | -0.36855600 |

|   |             |             |             |
|---|-------------|-------------|-------------|
| H | -0.79197100 | -3.29110700 | 1.11932600  |
| H | 0.32414700  | -0.15939000 | 0.95109700  |
| H | -1.37582300 | -5.48893700 | -1.78246200 |
| H | -0.10865700 | -4.52492100 | -0.83844500 |
| C | -2.54460000 | -3.77600700 | 2.24908700  |
| H | -3.62309800 | -3.90033600 | 2.12760600  |
| H | -2.11387400 | -4.73016400 | 2.57154700  |
| H | -2.35943100 | -3.03154600 | 3.03000000  |
| C | 3.22695600  | -0.99268600 | 0.72944000  |
| C | 4.41129500  | -1.37757100 | 0.09728600  |
| C | 3.19358800  | 0.05172700  | 1.66056000  |
| C | 5.59311400  | -0.69797700 | 0.38695100  |
| H | 4.39845000  | -2.19857600 | -0.61141400 |
| C | 4.37259000  | 0.73681100  | 1.94345700  |
| H | 2.26097900  | 0.34653500  | 2.13759100  |
| C | 5.55017800  | 0.35208200  | 1.30207500  |
| H | 6.53411400  | -0.96901200 | -0.07598800 |
| H | 4.39213600  | 1.55609500  | 2.65154800  |
| C | -3.91101700 | 0.16049000  | 0.09871500  |
| C | -3.85696100 | 0.96108700  | -1.04372900 |
| C | -4.16122600 | 0.69288300  | 1.36464700  |
| C | -4.03215600 | 2.33639800  | -0.91706000 |
| H | -3.68709800 | 0.50402700  | -2.01181800 |
| C | -4.33408200 | 2.06928600  | 1.49481800  |
| H | -4.19360400 | 0.05287800  | 2.23753500  |
| C | -4.25843200 | 2.86456300  | 0.35338200  |
| H | -4.00285800 | 2.99613700  | -1.77539100 |
| H | -4.51990800 | 2.52701400  | 2.45827100  |
| N | 6.79294200  | 1.09091700  | 1.59180900  |
| N | -4.41301400 | 4.32532800  | 0.49294200  |

|    |             |             |             |
|----|-------------|-------------|-------------|
| O  | 7.81696700  | 0.73358700  | 1.01090100  |
| O  | -4.21399700 | 5.01511900  | -0.50736300 |
| O  | 6.72718900  | 2.02706400  | 2.38708500  |
| O  | -4.71891100 | 4.76436100  | 1.59899600  |
| O  | 0.07181200  | 0.80458800  | 2.13526400  |
| C  | -0.81995200 | 0.44636100  | 2.98069900  |
| O  | -1.73982500 | -0.38417800 | 2.77289400  |
| C  | -0.72680400 | 1.08340800  | 4.36393900  |
| H  | 0.10072400  | 0.62071400  | 4.91542600  |
| H  | -0.50455500 | 2.15163900  | 4.27927500  |
| H  | -1.64867600 | 0.93122800  | 4.92914600  |
| H  | -2.02448200 | -1.27558800 | 1.37847900  |
| Se | -0.70425200 | -0.98483200 | -1.15090200 |
| C  | 1.45969800  | 1.44735100  | -2.08509300 |
| C  | 3.13320500  | 2.67441400  | -1.25016100 |
| C  | 1.97095700  | 3.13612000  | -0.71678500 |
| H  | 4.15294700  | 2.99494600  | -1.10763600 |
| H  | 1.78351300  | 3.92398300  | -0.00457200 |
| N  | 2.80659200  | 1.62287400  | -2.08580400 |
| N  | 0.94531700  | 2.37956800  | -1.24893800 |
| C  | 3.75270100  | 0.82395200  | -2.86253600 |
| H  | 3.85605600  | 1.22791400  | -3.87356900 |
| H  | 4.71849700  | 0.83877100  | -2.35599200 |
| H  | 3.37238300  | -0.19762200 | -2.91745000 |
| C  | -0.46955000 | 2.51925800  | -0.90293000 |
| H  | -0.68762400 | 3.57962200  | -0.76205600 |
| H  | -1.05524800 | 2.12610100  | -1.73259700 |
| H  | -0.67996100 | 1.96137000  | 0.01305900  |
| Se | 0.58032700  | 0.12516600  | -3.06279800 |

S31

0 imaginary frequency

H = -7573.491071

G = -7573.610599

Esol = -7574.063640

|   |             |             |             |
|---|-------------|-------------|-------------|
| N | -2.07071800 | -0.67065000 | 1.51549000  |
| N | 0.77509400  | 0.52511500  | 0.39713200  |
| S | -3.38568000 | -1.42875300 | 0.76786500  |
| O | -4.36156300 | -1.94533300 | 1.73943900  |
| O | -2.84700700 | -2.36577000 | -0.23449400 |
| S | 2.01582500  | 0.16998200  | 1.41706300  |
| O | 2.56815800  | -1.19325100 | 1.19583600  |
| O | 1.71983100  | 0.55258900  | 2.81128000  |
| C | -0.07405800 | -3.28350900 | 2.52108500  |
| C | -1.27676700 | -2.72895500 | 2.67787400  |
| C | -1.50245200 | -1.23926400 | 2.78383400  |
| H | -2.16513600 | -3.35457100 | 2.75973300  |
| H | -0.52951700 | -0.74274800 | 2.85576700  |
| H | -0.02336700 | 2.00078000  | 0.62479400  |
| H | 0.04185000  | -4.36524700 | 2.49054100  |
| H | 0.83349300  | -2.69005800 | 2.44473200  |
| C | -2.33334600 | -0.86103200 | 4.01891600  |
| H | -2.47259500 | 0.22461700  | 4.06209900  |
| H | -3.31539500 | -1.34104300 | 4.00083500  |
| H | -1.80355000 | -1.17415800 | 4.92516800  |
| C | 3.27176200  | 1.32633200  | 0.81993600  |
| C | 3.58339300  | 1.34454600  | -0.54357900 |
| C | 3.94242900  | 2.13993000  | 1.73182300  |
| C | 4.58840400  | 2.18828100  | -1.00232700 |

|   |             |             |             |
|---|-------------|-------------|-------------|
| H | 3.03031600  | 0.70890700  | -1.22835000 |
| C | 4.95002100  | 2.98998900  | 1.27770700  |
| H | 3.66512500  | 2.10728900  | 2.77968400  |
| C | 5.25657000  | 2.99640800  | -0.08075300 |
| H | 4.85757300  | 2.23805100  | -2.05008000 |
| H | 5.49291500  | 3.64030500  | 1.95232800  |
| C | -4.14187800 | -0.04066700 | -0.10609400 |
| C | -3.42998300 | 0.65328600  | -1.08997400 |
| C | -5.47158200 | 0.25856200  | 0.19240600  |
| C | -4.06677900 | 1.67846100  | -1.78286400 |
| H | -2.39033600 | 0.41334200  | -1.29277400 |
| C | -6.11185200 | 1.27975400  | -0.50632300 |
| H | -5.98951100 | -0.30420500 | 0.96083300  |
| C | -5.39608000 | 1.97005400  | -1.48076500 |
| H | -3.55327700 | 2.24743600  | -2.54775100 |
| H | -7.14267700 | 1.54490400  | -0.30768200 |
| N | 6.32411600  | 3.88851400  | -0.56472000 |
| N | -6.07069000 | 3.05408500  | -2.22154100 |
| O | 6.58683800  | 3.86427600  | -1.76714900 |
| O | -5.41821500 | 3.65066100  | -3.07635800 |
| O | 6.89234700  | 4.60146400  | 0.26131400  |
| O | -7.24310300 | 3.29322500  | -1.93826500 |
| O | -0.31241500 | 2.96744400  | 0.75606700  |
| C | -1.45628700 | 3.08773300  | 1.40643400  |
| O | -2.17965600 | 2.15622500  | 1.74990800  |
| C | -1.80325000 | 4.53038500  | 1.69473900  |
| H | -2.78321700 | 4.59164500  | 2.16892400  |
| H | -1.04430900 | 4.96492300  | 2.35415600  |
| H | -1.79583800 | 5.11047700  | 0.76640400  |
| H | -2.19069400 | 0.35601700  | 1.57934500  |

|    |             |             |             |
|----|-------------|-------------|-------------|
| Se | -0.11898700 | -0.86311400 | -0.34562500 |
| C  | 1.91494000  | -3.05126100 | -1.49282200 |
| C  | 1.92751900  | -5.08683300 | -0.58532400 |
| C  | 3.19522000  | -4.59512000 | -0.52430000 |
| H  | 1.51763200  | -6.02761100 | -0.25381800 |
| H  | 4.10127100  | -5.02321800 | -0.12594500 |
| N  | 1.14817800  | -4.12844100 | -1.20128600 |
| N  | 3.17325400  | -3.33932800 | -1.09708600 |
| C  | -0.29710900 | -4.21795700 | -1.42996300 |
| H  | -0.56386900 | -5.26832000 | -1.55699600 |
| H  | -0.84271300 | -3.78311100 | -0.58945600 |
| H  | -0.53088800 | -3.65870000 | -2.33665400 |
| C  | 4.30125800  | -2.40875600 | -1.14848500 |
| H  | 4.19629000  | -1.69314800 | -0.33049700 |
| H  | 5.22452400  | -2.98089500 | -1.04576400 |
| H  | 4.29756700  | -1.89261400 | -2.10903400 |
| Se | 1.30072500  | -1.46771500 | -2.29534600 |

S32

0 imaginary frequency

H = -3821.221973

G = -3821.293558

Esol = -3821.486964

|    |             |             |             |
|----|-------------|-------------|-------------|
| Se | 1.40733100  | -1.71887200 | -0.99951400 |
| N  | 0.45487500  | -0.26635400 | -1.21810500 |
| S  | 0.01605100  | 0.57764200  | 0.19240100  |
| O  | 0.50648600  | -0.02521000 | 1.45013200  |
| O  | 0.30317100  | 2.00206000  | -0.06749800 |
| C  | -1.77718000 | 0.39725700  | 0.18215600  |

|   |             |             |             |
|---|-------------|-------------|-------------|
| C | -2.38164900 | -0.47577500 | 1.08826800  |
| C | -2.52939800 | 1.13216400  | -0.73831300 |
| C | -3.76645100 | -0.62347000 | 1.07391200  |
| H | -1.76878200 | -1.01820200 | 1.79947400  |
| C | -3.91290000 | 0.98492900  | -0.76030500 |
| H | -2.03414000 | 1.81614600  | -1.41827100 |
| C | -4.50660000 | 0.10754500  | 0.14671700  |
| H | -4.27573700 | -1.28563400 | 1.76294500  |
| H | -4.53294500 | 1.53511400  | -1.45698000 |
| N | -5.97212700 | -0.04817600 | 0.12819800  |
| O | -6.60567500 | 0.60982800  | -0.69596100 |
| O | -6.47363700 | -0.82738500 | 0.93773100  |
| C | 3.57324300  | -0.02598600 | -0.09182000 |
| C | 3.82873000  | 1.15417000  | 1.79088700  |
| C | 3.70416200  | 2.03573000  | 0.76643100  |
| H | 3.95707700  | 1.31874000  | 2.84872000  |
| H | 3.69989500  | 3.11363800  | 0.76180000  |
| N | 3.75736100  | -0.12139900 | 1.25365100  |
| N | 3.54033000  | 1.29978300  | -0.39689600 |
| C | 3.62497400  | -1.37595000 | 1.98328400  |
| H | 4.22359600  | -1.32526600 | 2.89512300  |
| H | 2.57207400  | -1.54555200 | 2.22302100  |
| H | 3.99072900  | -2.18469800 | 1.34950000  |
| C | 3.25355300  | 1.82283500  | -1.72897300 |
| H | 2.35659600  | 2.44273100  | -1.67824000 |
| H | 4.10652700  | 2.39658000  | -2.10275800 |
| H | 3.06069400  | 0.97114500  | -2.38070100 |
| O | 3.44619900  | -0.99467000 | -0.91690100 |



S33

0 imaginary frequency

H = -5103.792903

G = -5103.904215

Esol = -5104.276517

|    |             |             |             |
|----|-------------|-------------|-------------|
| Se | -0.04643800 | -0.35380800 | -2.01983000 |
| N  | 1.10653800  | 0.73736800  | -1.21502100 |
| S  | 1.64908600  | 0.23463700  | 0.26663300  |
| O  | 2.05316600  | -1.18727300 | 0.37816300  |
| O  | 0.72192200  | 0.72225000  | 1.33181200  |
| C  | 3.15944900  | 1.20981300  | 0.41179100  |
| C  | 3.26695200  | 2.46607800  | -0.19276600 |
| C  | 4.19295900  | 0.69116000  | 1.19685500  |
| C  | 4.42740500  | 3.21407800  | -0.01139100 |
| H  | 2.46018100  | 2.83296200  | -0.81579400 |
| C  | 5.35336600  | 1.43756900  | 1.38561300  |
| H  | 4.08738700  | -0.29107800 | 1.64418400  |
| C  | 5.44944900  | 2.68803700  | 0.77774700  |
| H  | 4.55273400  | 4.18713100  | -0.46979000 |
| H  | 6.17561000  | 1.06918900  | 1.98632500  |
| N  | 6.67733800  | 3.47922100  | 0.97092100  |
| O  | 7.56980600  | 2.98720400  | 1.66002000  |
| O  | 6.73458200  | 4.58339100  | 0.43152100  |
| I  | -1.78214600 | 1.93408300  | 0.43911700  |
| C  | -3.51848800 | 3.00502200  | -0.29880300 |
| C  | -3.95838000 | 4.10822200  | 0.42384400  |
| C  | -4.11828300 | 2.57931400  | -1.47415300 |
| C  | -5.05637000 | 4.82090200  | -0.06770000 |
| H  | -3.47801300 | 4.41643900  | 1.34817600  |
| C  | -5.21749200 | 3.30268800  | -1.94567600 |

|   |             |             |             |
|---|-------------|-------------|-------------|
| H | -3.74965400 | 1.70463700  | -1.99894500 |
| C | -5.68348300 | 4.41875500  | -1.24803400 |
| H | -5.41955300 | 5.68492200  | 0.48136800  |
| H | -5.70752800 | 2.98549900  | -2.86162100 |
| H | -6.53844500 | 4.97405100  | -1.62243200 |
| N | -1.96106900 | 0.25720300  | -0.77544300 |
| S | -2.98964100 | -0.95475500 | -0.22021700 |
| O | -4.28738800 | -0.40537800 | 0.19325200  |
| O | -2.90050300 | -1.92005900 | -1.32797700 |
| C | -2.26986300 | -1.71904600 | 1.24636400  |
| C | -0.98381100 | -2.26208000 | 1.18490800  |
| C | -3.03446300 | -1.77103100 | 2.41522300  |
| C | -0.44430900 | -2.85820300 | 2.32099000  |
| H | -0.39509300 | -2.19686800 | 0.27719800  |
| C | -2.50256900 | -2.38032100 | 3.54928100  |
| H | -4.03011700 | -1.34275000 | 2.42553800  |
| C | -1.21625800 | -2.91244700 | 3.48010800  |
| H | 0.55994800  | -3.26123400 | 2.31573600  |
| H | -3.06155500 | -2.44634300 | 4.47426400  |
| N | -0.65049200 | -3.55277400 | 4.68248100  |
| O | -1.33972100 | -3.55953800 | 5.70155700  |
| O | 0.47355400  | -4.04265700 | 4.59146300  |
| C | 1.53082600  | -2.75684700 | -3.06067800 |
| C | 2.44563400  | -4.62423300 | -2.19007600 |
| C | 1.18813000  | -4.93614800 | -2.58993800 |
| H | 3.20882400  | -5.23363500 | -1.73239600 |
| H | 0.64764700  | -5.86857000 | -2.54787100 |
| N | 2.65906800  | -3.28340800 | -2.48738600 |
| N | 0.62606000  | -3.78662600 | -3.13467200 |
| C | 3.82968000  | -2.48670900 | -2.15084300 |

|   |             |             |             |
|---|-------------|-------------|-------------|
| H | 4.73707200  | -3.05056200 | -2.38363000 |
| H | 3.79679000  | -1.57806400 | -2.75361100 |
| H | 3.80657800  | -2.21150900 | -1.09307800 |
| C | -0.72609800 | -3.63145400 | -3.65546600 |
| H | -1.43813700 | -3.41292900 | -2.85383100 |
| H | -0.72252600 | -2.79954300 | -4.36212700 |
| H | -1.01943600 | -4.54688800 | -4.17571000 |
| O | 1.36493700  | -1.57112200 | -3.45392800 |

S35

0 imaginary frequency

H = -5017.993786

G = -5018.102700

Esol = -5018.496372

|    |            |             |             |
|----|------------|-------------|-------------|
| Se | 1.99835100 | -0.83337600 | 0.79380200  |
| N  | 2.56432300 | 0.52490700  | 1.66993800  |
| N  | 1.46844000 | -0.36716900 | -0.80568100 |
| S  | 2.88073800 | 2.05101500  | 1.03870000  |
| O  | 3.71846900 | 1.94682900  | -0.16317200 |
| O  | 3.32090800 | 2.84350400  | 2.18560700  |
| S  | 0.87985700 | -1.69947500 | -1.63720100 |
| O  | 1.12944400 | -2.94134900 | -0.86539700 |
| O  | 1.34718100 | -1.61086100 | -3.02128400 |
| C  | 4.39254200 | -2.32692400 | 0.20875700  |
| C  | 4.85239500 | -1.22379000 | -0.41675600 |
| C  | 4.65151500 | -0.89704300 | -1.86152900 |
| H  | 5.39290900 | -0.47728100 | 0.16616300  |
| H  | 4.12198100 | -1.71115300 | -2.36796900 |
| H  | 3.99886600 | -0.01358200 | -1.91338400 |

|   |             |             |             |
|---|-------------|-------------|-------------|
| H | 4.59911100  | -2.50496900 | 1.26174600  |
| H | 3.85813600  | -3.10726500 | -0.32826000 |
| C | 5.97364700  | -0.58213600 | -2.58335400 |
| H | 6.49335700  | 0.25711200  | -2.10716200 |
| H | 6.64720200  | -1.44636000 | -2.57700700 |
| H | 5.78098700  | -0.30971500 | -3.62609400 |
| C | -0.90360500 | -1.43725500 | -1.62784300 |
| C | -1.72812800 | -2.54051900 | -1.40244200 |
| C | -1.42997000 | -0.16699600 | -1.87165100 |
| C | -3.11023400 | -2.36804300 | -1.40264700 |
| H | -1.28827200 | -3.51368400 | -1.21615100 |
| C | -2.80892800 | 0.01783800  | -1.84592600 |
| H | -0.76924800 | 0.67344800  | -2.04554900 |
| C | -3.62338200 | -1.08909400 | -1.60511500 |
| H | -3.78672200 | -3.19605200 | -1.23088800 |
| H | -3.24987200 | 0.99599000  | -1.99949700 |
| N | -5.08174000 | -0.89592600 | -1.52462500 |
| O | -5.79222100 | -1.89953500 | -1.52968200 |
| O | -5.49576700 | 0.26011200  | -1.43909600 |
| C | 1.27431100  | 2.69420000  | 0.53735800  |
| C | 0.97943500  | 2.81552700  | -0.82058800 |
| C | 0.37508600  | 3.10223800  | 1.52522900  |
| C | -0.26155000 | 3.31991200  | -1.20305700 |
| H | 1.71112000  | 2.50678200  | -1.55744400 |
| C | -0.86433300 | 3.61108100  | 1.14853800  |
| H | 0.64778600  | 3.02993300  | 2.57231200  |
| C | -1.16678800 | 3.69081600  | -0.21071500 |
| H | -0.53426700 | 3.42726900  | -2.24595900 |
| H | -1.59098300 | 3.94184200  | 1.88032900  |
| N | -2.50123000 | 4.16992300  | -0.61259700 |

|   |             |             |             |
|---|-------------|-------------|-------------|
| O | -2.81759600 | 4.04236300  | -1.79616100 |
| O | -3.22193700 | 4.65128100  | 0.25896500  |
| C | -1.37009400 | -1.28062500 | 2.08681900  |
| C | -3.42227200 | -1.90259500 | 2.83299800  |
| C | -2.60604300 | -2.97163800 | 2.96097400  |
| H | -4.46793300 | -1.78321200 | 3.07008800  |
| H | -2.80053500 | -3.96520300 | 3.33319900  |
| N | -2.66827500 | -0.86079400 | 2.29683600  |
| N | -1.34213000 | -2.59785000 | 2.50008800  |
| C | -3.13564500 | 0.48134000  | 1.99525800  |
| H | -3.53136600 | 0.96089200  | 2.89633700  |
| H | -2.28074900 | 1.05022700  | 1.62867100  |
| H | -3.91418600 | 0.46305100  | 1.22573200  |
| C | -0.16512100 | -3.44941700 | 2.49871200  |
| H | -0.38116900 | -4.39286300 | 1.98895800  |
| H | 0.63344500  | -2.94387900 | 1.96045100  |
| H | 0.16586000  | -3.65741300 | 3.52220200  |
| O | -0.44618500 | -0.58817500 | 1.61648000  |

S36

0 imaginary frequency

H = -5018.034803

G = -5018.140918

Esol = -5018.537940

|    |             |            |             |
|----|-------------|------------|-------------|
| Se | 0.68062300  | 1.49886600 | -0.35805900 |
| N  | 2.51796600  | 1.89406000 | 0.18093100  |
| N  | -0.09490400 | 1.94161100 | 1.19410000  |
| S  | 3.66542300  | 1.18864800 | -0.82760500 |
| O  | 4.98566600  | 1.58577800 | -0.34623900 |

|   |             |             |             |
|---|-------------|-------------|-------------|
| O | 3.18805200  | 1.49327100  | -2.18378500 |
| S | 0.05276100  | 0.72732000  | 2.30339400  |
| O | -0.41603900 | 1.25956000  | 3.58355200  |
| O | 1.39804700  | 0.09933100  | 2.20450400  |
| C | 0.48941100  | 3.27026700  | -1.28751800 |
| C | 0.73918900  | 4.40855800  | -0.37275600 |
| C | -0.21191800 | 5.27340100  | -0.00087900 |
| H | 1.75763800  | 4.52412300  | -0.01021200 |
| H | -1.22760800 | 5.13142400  | -0.37407500 |
| H | 1.24189600  | 3.15208800  | -2.07200400 |
| H | -0.51531500 | 3.22257000  | -1.70706000 |
| C | 0.00404400  | 6.45302900  | 0.89751900  |
| H | 1.04773900  | 6.53127500  | 1.21704000  |
| H | -0.27499500 | 7.38970500  | 0.39672300  |
| H | -0.62299700 | 6.37564900  | 1.79567500  |
| C | -1.11527700 | -0.56008500 | 1.80714600  |
| C | -0.73069500 | -1.51879600 | 0.86514000  |
| C | -2.41668100 | -0.52234900 | 2.31319500  |
| C | -1.67194700 | -2.42611300 | 0.38871800  |
| H | 0.29574200  | -1.56285000 | 0.52031200  |
| C | -3.36083300 | -1.43384200 | 1.84900000  |
| H | -2.67404000 | 0.21259200  | 3.06819300  |
| C | -2.97672700 | -2.35373900 | 0.87423300  |
| H | -1.41285800 | -3.17934200 | -0.34498900 |
| H | -4.38056800 | -1.43376300 | 2.21312700  |
| N | -3.99012300 | -3.26333200 | 0.32000800  |
| O | -5.09892900 | -3.28083600 | 0.85045400  |
| O | -3.67384900 | -3.94309600 | -0.65967700 |
| C | 3.51628800  | -0.59481700 | -0.60586800 |
| C | 4.17942700  | -1.20756500 | 0.45945700  |

|   |             |             |             |
|---|-------------|-------------|-------------|
| C | 2.70768800  | -1.32236800 | -1.48346700 |
| C | 4.02871000  | -2.57705900 | 0.65915200  |
| H | 4.81629900  | -0.62348200 | 1.11479700  |
| C | 2.55225100  | -2.69242100 | -1.28500200 |
| H | 2.22849200  | -0.82336700 | -2.31814200 |
| C | 3.21167300  | -3.29227900 | -0.21382700 |
| H | 4.52623500  | -3.09070400 | 1.47214800  |
| H | 1.94483500  | -3.29786800 | -1.94635400 |
| N | 3.04210800  | -4.74380900 | -0.00259800 |
| O | 2.26824500  | -5.33851100 | -0.75127600 |
| O | 3.68149600  | -5.26381000 | 0.90836800  |
| H | 2.60153700  | 1.56555200  | 1.15156600  |
| C | -2.80823600 | 0.75864100  | -1.51479300 |
| C | -4.95274400 | 0.81822700  | -0.77751400 |
| C | -4.85575900 | -0.21406200 | -1.64652900 |
| H | -5.79507100 | 1.18135600  | -0.20980000 |
| H | -5.59454600 | -0.92772800 | -1.97631600 |
| N | -3.69648900 | 1.41489300  | -0.68849400 |
| N | -3.53873000 | -0.25619700 | -2.10130300 |
| C | -3.33243600 | 2.57170900  | 0.11108700  |
| H | -3.82685300 | 2.51758900  | 1.08467400  |
| H | -2.25325100 | 2.55075000  | 0.26619900  |
| H | -3.62339600 | 3.50496100  | -0.38620700 |
| C | -2.97606400 | -1.21163700 | -3.03913000 |
| H | -1.92051600 | -0.96439200 | -3.16104300 |
| H | -3.07550400 | -2.23073900 | -2.65225100 |
| H | -3.47607800 | -1.14073500 | -4.01077200 |
| O | -1.60942900 | 1.02926300  | -1.71496700 |

S37

0 imaginary frequency

H = -5018.045462

G = -5018.152061

Esol = -5018.549925

|    |             |             |             |
|----|-------------|-------------|-------------|
| Se | -0.23697500 | 0.17003300  | 0.09858600  |
| N  | -1.88018800 | -0.74764300 | -0.00755900 |
| N  | 0.78232600  | -0.58868200 | -1.25352000 |
| S  | -3.02607400 | -0.35378300 | -1.18831700 |
| O  | -3.14990800 | -1.45009300 | -2.15357400 |
| O  | -2.73931200 | 1.01694100  | -1.62016400 |
| S  | 1.30889600  | -2.17655700 | -0.99042500 |
| O  | 1.67051200  | -2.74277900 | -2.29233000 |
| O  | 0.31809900  | -2.82952800 | -0.12477300 |
| C  | 2.08828800  | 2.26346500  | -2.93013800 |
| C  | 1.06394000  | 1.53448800  | -2.48845700 |
| C  | 0.98824700  | 0.03468300  | -2.61046800 |
| H  | 0.17371400  | 2.01530300  | -2.08907500 |
| H  | 1.95648500  | -0.34108300 | -2.95377500 |
| H  | 2.07448800  | 3.34932400  | -2.89087300 |
| H  | 2.97954100  | 1.80465300  | -3.35402800 |
| C  | -0.09561400 | -0.37900900 | -3.61534500 |
| H  | -0.19069300 | -1.46651400 | -3.65818900 |
| H  | -1.06455600 | 0.05415200  | -3.35659100 |
| H  | 0.18410500  | -0.01346700 | -4.60981100 |
| C  | 2.83358800  | -2.04608400 | -0.03073300 |
| C  | 2.83820700  | -1.37520000 | 1.19642700  |
| C  | 3.97356100  | -2.68262000 | -0.52535400 |
| C  | 4.01194500  | -1.34332600 | 1.94249600  |
| H  | 1.95072700  | -0.86768100 | 1.55268200  |



|   |             |             |             |
|---|-------------|-------------|-------------|
| C | 5.14945500  | -2.65286700 | 0.22179800  |
| H | 3.93302100  | -3.19263600 | -1.48102900 |
| C | 5.14624400  | -1.98304200 | 1.44252900  |
| H | 4.05855100  | -0.83264400 | 2.89605500  |
| H | 6.05474400  | -3.13569000 | -0.12441700 |
| N | 6.39136600  | -1.94128900 | 2.23237700  |
| O | 7.37590100  | -2.51948200 | 1.77533300  |
| O | 6.36962300  | -1.32594800 | 3.29734100  |
| C | -4.55598300 | -0.31356700 | -0.23617400 |
| C | -5.40678300 | -1.41906800 | -0.27317200 |
| C | -4.86653200 | 0.82832500  | 0.50677200  |
| C | -6.59073800 | -1.39067900 | 0.46148600  |
| H | -5.14852500 | -2.27968400 | -0.88019700 |
| C | -6.04754500 | 0.86103300  | 1.24091400  |
| H | -4.19806400 | 1.68203500  | 0.49549000  |
| C | -6.88638200 | -0.25254000 | 1.20727000  |
| H | -7.28034700 | -2.22554000 | 0.46029700  |
| H | -6.32944500 | 1.72570300  | 1.82855700  |
| N | -8.13924700 | -0.21948500 | 1.98678100  |
| O | -8.37812500 | 0.79784600  | 2.63507500  |
| O | -8.86433500 | -1.21107900 | 1.94006000  |
| H | -1.74942200 | -1.75909500 | 0.07001800  |
| C | 2.38115500  | 2.85669700  | 0.58340600  |
| C | 3.69948900  | 4.66738800  | 0.17716100  |
| C | 2.42119800  | 5.10448400  | 0.22876500  |
| H | 4.61891800  | 5.20540000  | 0.00653400  |
| H | 2.01294400  | 6.09646400  | 0.11371700  |
| N | 3.68231100  | 3.29029600  | 0.39176900  |
| N | 1.60582900  | 3.99893800  | 0.47002000  |
| C | 4.82593900  | 2.40017400  | 0.41053600  |

|   |             |            |             |
|---|-------------|------------|-------------|
| H | 5.52849700  | 2.68267400 | 1.20204100  |
| H | 4.45255400  | 1.39383500 | 0.60387100  |
| H | 5.34607700  | 2.41301200 | -0.55343700 |
| C | 0.16516000  | 4.01153600 | 0.63880300  |
| H | -0.20479500 | 2.99881800 | 0.47837100  |
| H | -0.11833700 | 4.34460800 | 1.64447100  |
| H | -0.29030300 | 4.67695500 | -0.10034600 |
| O | 2.00558400  | 1.69972800 | 0.81520800  |

S38

0 imaginary frequency

H = -5247.169615

G = -5247.287794

Esol = -5247.743644

|   |             |             |             |
|---|-------------|-------------|-------------|
| N | 1.63785500  | 0.93296500  | 1.22224800  |
| N | -0.79557900 | -0.17414200 | 0.05270500  |
| S | 3.16599100  | 1.33792700  | 0.54076600  |
| O | 4.12966700  | 1.57009400  | 1.62169200  |
| O | 2.98463100  | 2.36979500  | -0.49648300 |
| S | -1.90204800 | -0.14426600 | 1.33694400  |
| O | -2.43320800 | 1.21867500  | 1.43873400  |
| O | -1.33167400 | -0.79643200 | 2.52502300  |
| C | 0.27895100  | 3.95928500  | 2.06681800  |
| C | 1.34282000  | 3.19416500  | 2.31919000  |
| C | 1.25892500  | 1.69778100  | 2.49478300  |
| H | 2.33691800  | 3.63390100  | 2.38982400  |
| H | 0.20829600  | 1.42320500  | 2.61224100  |
| H | -0.27183500 | -1.06491500 | 0.03889700  |
| H | 0.37072500  | 5.03607300  | 1.94640300  |

|   |             |             |             |
|---|-------------|-------------|-------------|
| H | -0.72096900 | 3.53934200  | 1.99157700  |
| C | 2.00254400  | 1.18965700  | 3.73573200  |
| H | 1.92144000  | 0.10209200  | 3.81871700  |
| H | 3.05732500  | 1.46716600  | 3.72589900  |
| H | 1.53142900  | 1.63301400  | 4.62003800  |
| C | -3.19657300 | -1.22143400 | 0.69855700  |
| C | -4.48547000 | -0.70448000 | 0.56809300  |
| C | -2.90337400 | -2.55649900 | 0.40203100  |
| C | -5.51064000 | -1.53602900 | 0.12199600  |
| H | -4.67659900 | 0.33276800  | 0.81753900  |
| C | -3.92460900 | -3.38591400 | -0.05139800 |
| H | -1.89447900 | -2.94230500 | 0.51089400  |
| C | -5.20973500 | -2.86085000 | -0.18159700 |
| H | -6.52608800 | -1.17740700 | 0.00887700  |
| H | -3.74234000 | -4.42368300 | -0.30103000 |
| C | 3.64272200  | -0.19563000 | -0.29112500 |
| C | 2.96956700  | -0.62734000 | -1.43941200 |
| C | 4.75260500  | -0.87909200 | 0.20967700  |
| C | 3.40843800  | -1.77900300 | -2.08654600 |
| H | 2.09685400  | -0.09291000 | -1.79556000 |
| C | 5.19628900  | -2.02789700 | -0.44113000 |
| H | 5.25818200  | -0.50920300 | 1.09417900  |
| C | 4.51496600  | -2.45612700 | -1.57766100 |
| H | 2.91121400  | -2.15200700 | -2.97309500 |
| H | 6.05338100  | -2.58628900 | -0.08602600 |
| N | -6.29300800 | -3.74267200 | -0.65786100 |
| N | 4.98178800  | -3.67488000 | -2.26786800 |
| O | -7.41537400 | -3.25323000 | -0.77224200 |
| O | 4.37793000  | -4.02110300 | -3.28105700 |
| O | -6.00538000 | -4.91090600 | -0.91037800 |

|    |             |             |             |
|----|-------------|-------------|-------------|
| O  | 5.94452200  | -4.26799700 | -1.78446300 |
| O  | 0.50184300  | -2.66514800 | 0.48451900  |
| C  | 1.21765900  | -2.79776200 | 1.47320300  |
| O  | 1.85394700  | -1.79709600 | 2.07078000  |
| C  | 1.46186400  | -4.12174200 | 2.14944700  |
| H  | 2.52552600  | -4.25050200 | 2.36810300  |
| H  | 0.92549100  | -4.13609000 | 3.10512200  |
| H  | 1.10055300  | -4.93440300 | 1.51860000  |
| H  | 1.64565100  | -0.91374700 | 1.65512200  |
| Se | 0.28413100  | 1.29873400  | -0.23844100 |
| C  | -1.56711900 | 3.21609200  | -1.88224500 |
| C  | -1.40898000 | 5.46616700  | -1.66117400 |
| C  | -2.69390200 | 5.12420400  | -1.40787300 |
| H  | -0.92796700 | 6.43166300  | -1.67065200 |
| H  | -3.54625800 | 5.73451800  | -1.15356900 |
| N  | -0.71402400 | 4.29703000  | -1.96073600 |
| N  | -2.79548600 | 3.74224000  | -1.54773000 |
| C  | 0.70542400  | 4.17241200  | -2.25065700 |
| H  | 1.00189200  | 4.92048300  | -2.99162700 |
| H  | 1.31061900  | 4.28941400  | -1.34713600 |
| H  | 0.87608000  | 3.17563200  | -2.65900300 |
| C  | -3.96432900 | 2.92050900  | -1.29627200 |
| H  | -3.75107300 | 1.92235500  | -1.68113000 |
| H  | -4.16607300 | 2.85110500  | -0.22235200 |
| H  | -4.83543800 | 3.33508200  | -1.81260900 |
| O  | -1.28628600 | 2.01503500  | -2.06919200 |

S39

0 imaginary frequency

H = -5247.167817

G = -5247.285776

Esol = -5247.741965

|   |             |             |             |
|---|-------------|-------------|-------------|
| N | -1.23603900 | 0.06922600  | 0.73759700  |
| N | 1.99285100  | -0.27055000 | 0.01191800  |
| S | -2.13225000 | -1.26748600 | 1.02448400  |
| O | -2.19157800 | -1.50781500 | 2.47077400  |
| O | -1.65969400 | -2.30938500 | 0.10042300  |
| S | 3.28889700  | 0.71150000  | -0.43910100 |
| O | 3.60952000  | 0.34443400  | -1.82984300 |
| O | 4.36795100  | 0.75232000  | 0.56190300  |
| C | 1.10210900  | 1.30759700  | 3.14560300  |
| C | -0.06631100 | 0.71890100  | 2.83387900  |
| C | -0.94773500 | 1.16257600  | 1.68648300  |
| H | -0.46188700 | -0.08550200 | 3.44925600  |
| H | -0.38823300 | 1.88275100  | 1.08081700  |
| H | 1.23859200  | -1.07321700 | -1.28296200 |
| H | 1.67523100  | 1.01048000  | 4.01875400  |
| H | 1.50648000  | 2.13055900  | 2.56044000  |
| C | -2.21911200 | 1.85430100  | 2.20653000  |
| H | -2.83660700 | 2.19615800  | 1.36972600  |
| H | -2.81137400 | 1.17453700  | 2.82664200  |
| H | -1.94803300 | 2.72050400  | 2.81848600  |
| C | 2.55728200  | 2.36291100  | -0.48757900 |
| C | 3.15795900  | 3.38220100  | 0.25362700  |
| C | 1.43281000  | 2.60407800  | -1.28549900 |
| C | 2.62742400  | 4.67054000  | 0.20336200  |
| H | 4.03155700  | 3.15875700  | 0.85602500  |
| C | 0.89700700  | 3.88804400  | -1.33351600 |
| H | 0.96834600  | 1.80011300  | -1.84730800 |

|    |             |             |             |
|----|-------------|-------------|-------------|
| C  | 1.50511000  | 4.89942800  | -0.58878200 |
| H  | 3.06637900  | 5.48879100  | 0.76071800  |
| H  | 0.02615800  | 4.11581600  | -1.93564500 |
| C  | -3.81660600 | -0.87970300 | 0.49306100  |
| C  | -4.02738400 | -0.36820700 | -0.79252400 |
| C  | -4.87823700 | -1.13896600 | 1.36029400  |
| C  | -5.32729800 | -0.10794700 | -1.21371300 |
| H  | -3.18608200 | -0.16828500 | -1.45050900 |
| C  | -6.18222300 | -0.88070900 | 0.94050400  |
| H  | -4.67868300 | -1.53306800 | 2.35047200  |
| C  | -6.38245600 | -0.37037300 | -0.33916900 |
| H  | -5.53577300 | 0.29208900  | -2.19818800 |
| H  | -7.03381600 | -1.06660700 | 1.58309600  |
| N  | 0.93616200  | 6.25865800  | -0.63837500 |
| N  | -7.76044300 | -0.09519600 | -0.78632300 |
| O  | 1.49002100  | 7.13323400  | 0.02620800  |
| O  | -7.91180600 | 0.35077000  | -1.92259400 |
| O  | -0.05944600 | 6.43440900  | -1.33920100 |
| O  | -8.67339800 | -0.32938700 | 0.00391500  |
| O  | 0.84091700  | -1.64829500 | -2.02363800 |
| C  | -0.26808600 | -1.11081900 | -2.49314500 |
| O  | -0.74128600 | -0.04496200 | -2.09320100 |
| C  | -0.93514900 | -1.95023800 | -3.55417900 |
| H  | -1.57058400 | -1.32305500 | -4.18177600 |
| H  | -0.19666600 | -2.47852800 | -4.16162500 |
| H  | -1.56392200 | -2.69485900 | -3.05142500 |
| H  | -0.83836200 | 0.10866800  | -0.20629600 |
| Se | 2.01658400  | -0.95577800 | 1.63918000  |
| C  | 3.25336600  | -3.22800200 | 0.20877400  |
| C  | 2.60713000  | -4.46189800 | -1.54293100 |

|   |            |             |             |
|---|------------|-------------|-------------|
| C | 3.80783500 | -3.90903800 | -1.85041900 |
| H | 1.96118300 | -5.10724600 | -2.11623200 |
| H | 4.41158400 | -3.98471900 | -2.74057500 |
| N | 2.27142800 | -4.04383300 | -0.26509200 |
| N | 4.20027700 | -3.13814600 | -0.76621800 |
| C | 1.02745700 | -4.30864900 | 0.45160100  |
| H | 0.71631000 | -5.33742800 | 0.25585000  |
| H | 1.21699300 | -4.18461700 | 1.51818400  |
| H | 0.24520300 | -3.61158000 | 0.14139700  |
| C | 5.41180000 | -2.32925300 | -0.66500000 |
| H | 6.29580800 | -2.97253500 | -0.70370100 |
| H | 5.42833800 | -1.59931200 | -1.47671000 |
| H | 5.37915400 | -1.79447200 | 0.28380700  |
| O | 3.29913600 | -2.67203600 | 1.35811800  |

S4

0 imaginary frequency

H = -7929.356771

G = -7929.476098

Esol = -7930.111134

|    |             |             |             |
|----|-------------|-------------|-------------|
| Se | -0.95649100 | -0.58271300 | 1.15378700  |
| N  | -2.01996600 | -1.42947900 | 0.06477200  |
| S  | -2.62358100 | -0.65883400 | -1.29316500 |
| O  | -2.57207200 | -1.64436900 | -2.38146700 |
| O  | -1.99865300 | 0.66379900  | -1.49667200 |
| C  | -4.36529000 | -0.38457900 | -0.91100000 |
| C  | -4.71654400 | 0.53740400  | 0.07924200  |
| C  | -5.32674300 | -1.09240900 | -1.63348200 |
| C  | -6.06404500 | 0.75440300  | 0.35148500  |

|    |             |             |             |
|----|-------------|-------------|-------------|
| H  | -3.94662500 | 1.06866600  | 0.63106400  |
| C  | -6.67623800 | -0.87543500 | -1.36384800 |
| H  | -5.01310800 | -1.79729500 | -2.39495100 |
| C  | -7.01943000 | 0.04392600  | -0.37535700 |
| H  | -6.38130600 | 1.45756600  | 1.11146700  |
| H  | -7.45547400 | -1.40142800 | -1.90104300 |
| N  | -8.44735600 | 0.27306400  | -0.08694900 |
| O  | -8.72899000 | 1.09160100  | 0.78676700  |
| O  | -9.27117500 | -0.36878100 | -0.73789900 |
| N  | -1.75139800 | 0.96485000  | 1.52678800  |
| S  | -0.89431000 | 1.95848900  | 2.52959400  |
| O  | -1.84884000 | 2.86022600  | 3.17543500  |
| O  | 0.07500700  | 1.20426300  | 3.35945100  |
| C  | 0.10521900  | 2.89828600  | 1.35267200  |
| C  | -0.46402200 | 3.33332200  | 0.15179900  |
| C  | 1.46640200  | 3.05866900  | 1.61489700  |
| C  | 0.35269800  | 3.89965400  | -0.82315600 |
| H  | -1.51588400 | 3.16519900  | -0.04789400 |
| C  | 2.28782900  | 3.62509100  | 0.64703400  |
| H  | 1.87383100  | 2.70311700  | 2.55442300  |
| C  | 1.71861100  | 4.00797100  | -0.56671100 |
| H  | -0.04372800 | 4.21519600  | -1.78026400 |
| H  | 3.35282200  | 3.74531400  | 0.80212000  |
| N  | 2.60349500  | 4.49460200  | -1.63549300 |
| O  | 3.81698500  | 4.31527500  | -1.49512200 |
| O  | 2.08672600  | 5.03271300  | -2.61113500 |
| Se | 0.92270400  | 0.27208000  | -0.49722400 |
| P  | 2.49224700  | -1.24934500 | -0.18337600 |
| C  | -0.16299000 | -5.09444500 | -1.13032500 |
| C  | 0.84797100  | -5.17214700 | 0.02015300  |



|   |             |             |             |
|---|-------------|-------------|-------------|
| C | 1.29777900  | -3.77758800 | 0.49230600  |
| C | 1.87284000  | -2.95331900 | -0.68288600 |
| C | 0.80819600  | -2.85635800 | -1.80475200 |
| C | 0.38722600  | -4.25231500 | -2.28779500 |
| H | -1.09251800 | -4.63512300 | -0.76886900 |
| H | -0.41778700 | -6.10366800 | -1.47590800 |
| H | 1.73324100  | -5.74005800 | -0.30315100 |
| H | 0.43635600  | -3.24030600 | 0.91040400  |
| H | 2.76967200  | -3.46365100 | -1.06810300 |
| H | -0.07201500 | -2.34448700 | -1.40901700 |
| H | 1.16073500  | -2.25567000 | -2.64594600 |
| H | 1.24346800  | -4.76547800 | -2.75148900 |
| H | -0.37470500 | -4.13306700 | -3.06595400 |
| H | 0.42316700  | -5.71621700 | 0.87260700  |
| H | 2.03085500  | -3.89048800 | 1.29594900  |
| C | 4.12043200  | -2.06120200 | 4.22760100  |
| C | 2.96497900  | -1.06939100 | 4.03934500  |
| C | 2.23612300  | -1.28337200 | 2.70236600  |
| C | 3.23920200  | -1.20367000 | 1.53089600  |
| C | 4.41102300  | -2.19967400 | 1.69962200  |
| C | 5.10924300  | -1.98823500 | 3.05622700  |
| H | 3.71807300  | -3.08230300 | 4.30134300  |
| H | 4.64276900  | -1.86345500 | 5.17130500  |
| H | 3.35293700  | -0.04139900 | 4.07731700  |
| H | 1.73929900  | -2.25910600 | 2.71728000  |
| H | 3.65766600  | -0.18848700 | 1.55513300  |
| H | 4.03820000  | -3.23025200 | 1.64350700  |
| H | 5.14419200  | -2.08480900 | 0.89226600  |
| H | 5.60119400  | -1.00482500 | 3.05536900  |
| H | 5.90429700  | -2.73481300 | 3.17261000  |

|   |            |             |             |
|---|------------|-------------|-------------|
| H | 2.24114800 | -1.15455500 | 4.85739500  |
| H | 1.46572900 | -0.51837500 | 2.59315200  |
| C | 5.14015800 | 1.09895900  | -3.33904000 |
| C | 4.54389700 | -0.24575800 | -3.76821800 |
| C | 3.41657100 | -0.70562900 | -2.82825900 |
| C | 3.88047700 | -0.75475400 | -1.35303900 |
| C | 4.52155800 | 0.58851000  | -0.92704100 |
| C | 5.63572700 | 1.02940400  | -1.89117200 |
| H | 4.38165600 | 1.88925800  | -3.42360800 |
| H | 5.96195700 | 1.38078900  | -4.00788900 |
| H | 5.33660300 | -1.00845400 | -3.78283200 |
| H | 2.56135500 | -0.02240800 | -2.91025400 |
| H | 4.62750600 | -1.55585600 | -1.24938000 |
| H | 6.47717600 | 0.32395100  | -1.82324400 |
| H | 6.01249600 | 2.00617200  | -1.56756800 |
| H | 4.14917400 | -0.18757700 | -4.78955400 |
| H | 3.06666100 | -1.69188900 | -3.14777900 |
| H | 3.74406900 | 1.36185100  | -0.89513400 |
| H | 4.93766200 | 0.51464800  | 0.08366700  |

S40

0 imaginary frequency

H = -7519.690486

G = -7519.810528

Esol = -7520.205022

|    |             |             |             |
|----|-------------|-------------|-------------|
| Se | -0.50865800 | -0.29695600 | -0.38625400 |
| N  | -1.32227500 | -0.18210700 | 1.17714100  |
| N  | 0.26315700  | -1.85333300 | -0.04981000 |
| S  | -2.15339800 | 1.21236400  | 1.44075000  |

|   |             |             |             |
|---|-------------|-------------|-------------|
| O | -2.61093500 | 1.16933000  | 2.82287100  |
| O | -3.07017200 | 1.56505600  | 0.35834400  |
| S | 1.36471100  | -2.25485000 | -1.22130100 |
| O | 1.24464100  | -1.40550100 | -2.41040900 |
| O | 1.39356100  | -3.70651400 | -1.33896200 |
| C | -0.36132300 | 2.97835800  | -2.30109300 |
| C | 1.21816700  | 4.50927500  | -2.86399500 |
| C | 0.12926900  | 5.18997300  | -2.43549500 |
| H | 2.17348000  | 4.86405200  | -3.21808200 |
| H | -0.04523300 | 6.25103500  | -2.34793800 |
| N | 0.92501300  | 3.15029700  | -2.77868900 |
| N | -0.84316400 | 4.25493500  | -2.08641500 |
| C | 1.79215200  | 2.03889600  | -3.12510500 |
| H | 1.90620300  | 1.94578300  | -4.21108300 |
| H | 2.77782000  | 2.17134300  | -2.66914600 |
| H | 1.33957400  | 1.12583400  | -2.73774700 |
| C | -2.16000500 | 4.52456200  | -1.53804200 |
| H | -2.56935200 | 3.58260900  | -1.17082600 |
| H | -2.08231300 | 5.22748200  | -0.70305300 |
| H | -2.82701300 | 4.94241200  | -2.30088300 |
| O | -0.95652100 | 1.90600100  | -2.12094600 |
| C | -4.91405800 | -2.60037400 | 1.74138600  |
| C | -3.69376400 | -2.65043600 | 0.86276900  |
| C | -3.90026800 | -1.82292200 | -0.42326400 |
| C | -5.22858900 | -2.24930800 | -1.09583500 |
| C | -6.41826300 | -2.13971500 | -0.13828600 |
| C | -6.16538500 | -2.34592200 | 1.31038100  |
| H | -4.75114700 | -2.78801700 | 2.80217600  |
| H | -2.82308300 | -2.27494800 | 1.40984700  |
| H | -4.00728800 | -0.77154700 | -0.13313800 |

|    |             |             |             |
|----|-------------|-------------|-------------|
| H  | -5.45449100 | -1.64669400 | -1.98029000 |
| H  | -3.47337400 | -3.70042300 | 0.61618800  |
| H  | -5.16514200 | -3.29747700 | -1.42493700 |
| C  | -7.36353300 | -2.27705500 | 2.21847200  |
| H  | -7.83920100 | -1.29162500 | 2.15924800  |
| H  | -8.12466800 | -3.00536200 | 1.91661300  |
| H  | -7.08268600 | -2.46735400 | 3.25847000  |
| O  | -7.54050500 | -1.93232900 | -0.57402800 |
| C  | -2.76988900 | -1.91909000 | -1.41342200 |
| C  | -2.11832000 | -3.23138700 | -1.66752100 |
| H  | -2.74626000 | 0.19015800  | -1.86212100 |
| H  | -2.81983000 | -4.07017400 | -1.62816400 |
| H  | -1.57612300 | -3.25014200 | -2.61606300 |
| C  | -2.27612000 | -0.77834900 | -2.00948300 |
| H  | -1.56145200 | -0.84441100 | -2.82616600 |
| H  | -1.37004300 | -3.39696800 | -0.86780200 |
| O  | 2.79643600  | -1.76246400 | -0.54896600 |
| C  | 3.36342800  | -2.58935400 | 0.47077100  |
| H  | 3.03905900  | -2.23949200 | 1.45480700  |
| H  | 3.07627200  | -3.63307300 | 0.32424300  |
| C  | 4.89240100  | -2.49064000 | 0.39102000  |
| Cl | 5.43012900  | -0.79269100 | 0.62839000  |
| Cl | 5.54156200  | -3.51772900 | 1.72693200  |
| Cl | 5.48764500  | -3.10007400 | -1.18472700 |
| O  | -0.98598700 | 2.41309000  | 1.33034000  |
| C  | -0.13485500 | 2.57500900  | 2.46298400  |
| H  | -0.15400100 | 1.69937700  | 3.11614300  |
| H  | -0.45079500 | 3.45412900  | 3.03188800  |
| C  | 1.30972600  | 2.80240600  | 1.99504600  |
| Cl | 1.41365000  | 4.22859800  | 0.91366800  |

|    |            |            |            |
|----|------------|------------|------------|
| Cl | 1.93964300 | 1.35152400 | 1.12707900 |
| Cl | 2.30481800 | 3.08297800 | 3.47101200 |

S41

0 imaginary frequency

H = -7519.718688

G = -7519.836086

Esol = -7520.235016

|    |             |             |             |
|----|-------------|-------------|-------------|
| Se | -0.34297500 | -1.13704600 | 0.39895300  |
| N  | 0.89571000  | 0.04868400  | 1.05525500  |
| N  | -0.09559400 | -0.65972700 | -1.38173600 |
| S  | 0.85817600  | -0.11131900 | 2.66663800  |
| O  | 2.09784500  | 0.39636600  | 3.23944800  |
| O  | 0.32373200  | -1.44119000 | 3.04328200  |
| S  | -1.38612900 | -0.09880900 | -2.28191000 |
| O  | -2.44916200 | 0.22888500  | -1.34438400 |
| O  | -1.58324800 | -0.91495000 | -3.46293600 |
| C  | -3.20258500 | -3.23249800 | -0.58962500 |
| C  | -5.38423200 | -3.76429100 | -0.90178300 |
| C  | -5.19082900 | -3.62594500 | 0.42926300  |
| H  | -6.27521300 | -4.00181900 | -1.46151500 |
| H  | -5.87965000 | -3.71943300 | 1.25407600  |
| N  | -4.16605100 | -3.51867200 | -1.53225100 |
| N  | -3.85150700 | -3.29288800 | 0.62726900  |
| C  | -3.90537400 | -3.55439200 | -2.96114900 |
| H  | -2.93450800 | -3.09213300 | -3.14014000 |
| H  | -3.89616300 | -4.58540100 | -3.33257300 |
| H  | -4.67238700 | -2.98538100 | -3.49427100 |
| C  | -3.19978900 | -3.07278300 | 1.90711200  |

|   |             |             |             |
|---|-------------|-------------|-------------|
| H | -2.28060000 | -2.51746000 | 1.73296800  |
| H | -3.84705200 | -2.47845600 | 2.55715800  |
| H | -2.95832300 | -4.01951200 | 2.40332200  |
| O | -1.99751700 | -2.99011400 | -0.80047900 |
| C | 5.09000500  | -0.39214000 | -0.33426600 |
| C | 3.76762300  | -0.88490300 | -0.85708900 |
| C | 3.22729000  | -2.06478700 | -0.02809700 |
| C | 4.33821800  | -3.11631400 | 0.16234100  |
| C | 5.61553300  | -2.52504000 | 0.75621300  |
| C | 5.93801500  | -1.11180400 | 0.42578900  |
| H | 5.36116900  | 0.62954500  | -0.59978100 |
| H | 3.03899400  | -0.06632000 | -0.84203500 |
| H | 2.98351600  | -1.65639500 | 0.95754900  |
| H | 4.02027600  | -3.94270100 | 0.80603800  |
| H | 3.88383900  | -1.17557700 | -1.91364400 |
| H | 4.60041800  | -3.55674600 | -0.81173500 |
| C | 7.23758800  | -0.57577300 | 0.96285000  |
| H | 7.24868000  | -0.61475800 | 2.05790500  |
| H | 8.08226600  | -1.18667400 | 0.62463800  |
| H | 7.39971400  | 0.45943800  | 0.64800000  |
| O | 6.36463200  | -3.21063600 | 1.43691100  |
| C | 1.96411400  | -2.69650200 | -0.60458200 |
| C | 1.88761200  | -3.17366700 | -1.86135900 |
| H | 1.02112100  | -2.96651200 | 1.34158200  |
| H | 2.73097800  | -3.13209900 | -2.54534300 |
| H | 0.98645200  | -3.65675100 | -2.23156100 |
| C | 0.77272100  | -2.82474800 | 0.28857200  |
| H | 0.03871400  | -3.55237000 | -0.05499600 |
| H | 0.56534500  | -1.25257900 | -1.89626700 |
| O | -0.75611400 | 1.28495700  | -2.88063300 |

|    |             |            |             |
|----|-------------|------------|-------------|
| C  | -0.39858100 | 2.29587500 | -1.92450500 |
| H  | -1.28816000 | 2.84853900 | -1.61447800 |
| H  | 0.09058300  | 1.84300500 | -1.05675400 |
| C  | 0.58413900  | 3.25845200 | -2.59822100 |
| Cl | 0.99000900  | 4.51597900 | -1.37321600 |
| Cl | 2.08003600  | 2.39275700 | -3.09192900 |
| Cl | -0.16555300 | 4.03180300 | -4.03251100 |
| O  | -0.37559400 | 0.86413200 | 3.25433900  |
| C  | -0.27361600 | 2.25081100 | 2.97615500  |
| H  | 0.34966600  | 2.44319900 | 2.09724600  |
| H  | 0.13212700  | 2.78627000 | 3.83967100  |
| C  | -1.68327300 | 2.78364200 | 2.68169500  |
| Cl | -2.75494200 | 2.56587600 | 4.10567400  |
| Cl | -2.38257000 | 1.92369000 | 1.26590700  |
| Cl | -1.53023600 | 4.54343300 | 2.30930200  |

S42

0 imaginary frequency

H = -7519.693846

G = -7519.812930

Esol = -7520.209522

|    |             |             |            |
|----|-------------|-------------|------------|
| Se | 0.32298900  | -0.41042100 | 0.60752300 |
| N  | 0.52180000  | 1.21794500  | 1.24511800 |
| N  | -1.30864500 | -0.63894300 | 1.19489400 |
| S  | 1.91792300  | 1.92789000  | 0.73385600 |
| O  | 2.81386200  | 0.98851900  | 0.04984000 |
| O  | 2.41533600  | 2.77812900  | 1.80936800 |
| S  | -1.82897500 | -2.17761800 | 0.91671900 |
| O  | -2.37312000 | -2.74326700 | 2.14801900 |

|   |             |             |             |
|---|-------------|-------------|-------------|
| O | -0.86188100 | -2.93795200 | 0.11786200  |
| C | 2.05056300  | -0.87495200 | 3.00156500  |
| C | 3.68090900  | 0.10778600  | 4.17376700  |
| C | 2.50417100  | 0.38558100  | 4.79426300  |
| H | 4.69025400  | 0.39669600  | 4.41977500  |
| H | 2.29490900  | 0.96698900  | 5.67794800  |
| N | 3.39653000  | -0.66987000 | 3.06403700  |
| N | 1.49807700  | -0.22742600 | 4.06758000  |
| C | 4.35732900  | -1.16649900 | 2.07872500  |
| H | 3.89740400  | -1.95994200 | 1.48792600  |
| H | 4.65175300  | -0.35308800 | 1.41125000  |
| H | 5.22982200  | -1.56395100 | 2.60261200  |
| C | 0.06104000  | -0.16030300 | 4.32142400  |
| H | -0.41983100 | -1.01188500 | 3.83917000  |
| H | -0.11141100 | -0.20210200 | 5.39908500  |
| H | -0.35207100 | 0.75988800  | 3.90399900  |
| O | 1.42707800  | -1.56724300 | 2.13133100  |
| C | 2.93462600  | -4.13577400 | -3.68608200 |
| C | 1.86003200  | -3.10379900 | -3.89999900 |
| C | 1.29609600  | -2.56344100 | -2.56613800 |
| C | 2.46813700  | -2.18904200 | -1.64790900 |
| C | 3.43914000  | -3.33632100 | -1.42788500 |
| C | 3.65117700  | -4.28195700 | -2.55409500 |
| H | 2.26830100  | -2.26806200 | -4.49135600 |
| H | 3.13535100  | -4.80671600 | -4.52198900 |
| H | 1.06163200  | -3.53861900 | -4.51370600 |
| C | 4.69525300  | -5.34825000 | -2.35846600 |
| H | 5.67264800  | -4.90389600 | -2.13799700 |
| H | 4.44579200  | -5.98249700 | -1.50024800 |
| H | 4.78785700  | -5.98080600 | -3.24651700 |



|    |             |             |             |
|----|-------------|-------------|-------------|
| O  | 4.06915300  | -3.44929200 | -0.38099200 |
| C  | 0.27110700  | -1.45722100 | -2.78736000 |
| C  | -1.07956500 | -1.91830100 | -3.27939100 |
| C  | 0.52027100  | -0.15575800 | -2.56435400 |
| H  | 1.48376900  | 0.21523700  | -2.22812800 |
| H  | -0.99521000 | -2.48411300 | -4.21664900 |
| H  | -1.75322600 | -1.07464300 | -3.45474000 |
| H  | 2.11247400  | -1.85519000 | -0.67429400 |
| H  | -0.23772300 | 0.59910400  | -2.75964900 |
| H  | 3.04641400  | -1.35862800 | -2.08065000 |
| H  | 0.76195600  | -3.39518500 | -2.08464200 |
| H  | -1.54770200 | -2.58250100 | -2.54299400 |
| O  | -3.10257400 | -1.91819100 | -0.12220900 |
| C  | -4.43543400 | -2.12318500 | 0.33524700  |
| H  | -4.45281900 | -2.36705800 | 1.39943100  |
| H  | -4.87052700 | -2.94537100 | -0.23994400 |
| C  | -5.29234400 | -0.86985100 | 0.09320100  |
| Cl | -4.68997700 | 0.51504200  | 1.05205700  |
| Cl | -6.97160900 | -1.29161000 | 0.61507000  |
| Cl | -5.30368400 | -0.43982800 | -1.65285300 |
| O  | 1.41466700  | 2.91132100  | -0.49818800 |
| C  | 0.59122300  | 4.01702000  | -0.12196100 |
| H  | -0.41134600 | 3.67017900  | 0.14627500  |
| H  | 1.03949100  | 4.56081100  | 0.71365400  |
| C  | 0.47977900  | 4.96564300  | -1.31988000 |
| Cl | -0.57560200 | 6.33392200  | -0.79433500 |
| Cl | -0.27640300 | 4.13479500  | -2.72208000 |
| Cl | 2.09208100  | 5.59467500  | -1.78740500 |

S43

0 imaginary frequency

H = -7519.724810

G = -7519.842627

Esol = -7520.241285

|    |             |             |             |
|----|-------------|-------------|-------------|
| Se | -0.03990300 | -1.07412200 | 1.03200100  |
| N  | -0.86499900 | 0.49878700  | 1.44100800  |
| N  | 1.14557100  | -0.25772600 | -0.20918700 |
| S  | -2.11492100 | 0.13072000  | 2.40741100  |
| O  | -2.30884200 | 1.13432200  | 3.43748400  |
| O  | -2.02262100 | -1.31292300 | 2.77452200  |
| S  | 0.44253500  | -0.08467900 | -1.75456200 |
| O  | -0.96842100 | -0.45265800 | -1.66593300 |
| O  | 1.33201100  | -0.67220400 | -2.73667100 |
| C  | 1.62146000  | -3.92791900 | -0.65761700 |
| C  | 0.76901500  | -5.81072600 | -1.58247000 |
| C  | 1.80760600  | -5.41112600 | -2.35135800 |
| H  | 0.10334600  | -6.65389200 | -1.67893400 |
| H  | 2.21946700  | -5.83750200 | -3.25243600 |
| N  | 0.64730400  | -4.89450400 | -0.53841900 |
| N  | 2.33925400  | -4.25644800 | -1.78102600 |
| C  | -0.32648700 | -4.92237500 | 0.53952000  |
| H  | -0.50808900 | -3.89933500 | 0.87039300  |
| H  | -1.26329400 | -5.34740100 | 0.17146800  |
| H  | 0.02991500  | -5.51535700 | 1.38942300  |
| C  | 3.41358800  | -3.43813700 | -2.32948900 |
| H  | 4.23932900  | -4.08428000 | -2.64053300 |
| H  | 3.05536200  | -2.85533200 | -3.18319900 |
| H  | 3.76151900  | -2.74620400 | -1.56172900 |
| O  | 1.81003600  | -2.96009100 | 0.11391900  |

|   |             |             |             |
|---|-------------|-------------|-------------|
| C | 4.78262100  | 2.09948100  | 1.48548800  |
| C | 4.04085200  | 1.57885800  | 2.69281400  |
| C | 3.27881500  | 0.30091600  | 2.40913800  |
| C | 4.08697700  | -0.64954900 | 1.56060000  |
| C | 4.53498800  | 0.01256300  | 0.25562600  |
| C | 4.99477300  | 1.41854900  | 0.34330100  |
| H | 4.77292100  | 1.40967600  | 3.50398400  |
| H | 5.14492800  | 3.12450900  | 1.56285300  |
| H | 3.38017600  | 2.37087500  | 3.05630500  |
| C | 5.66050500  | 1.99898700  | -0.87504800 |
| H | 5.98456200  | 3.02853800  | -0.69692100 |
| H | 6.53038500  | 1.40164300  | -1.17156400 |
| H | 4.97171600  | 1.99106300  | -1.72699400 |
| O | 4.55227200  | -0.61120300 | -0.79846600 |
| C | 2.01855900  | 0.08644700  | 2.84941000  |
| C | 1.28064800  | 1.08801400  | 3.71975400  |
| C | 1.29288200  | -1.18701100 | 2.55121300  |
| H | 1.90919400  | -2.03759900 | 2.26943200  |
| H | 1.94523000  | 1.56294900  | 4.44808700  |
| H | 0.47541900  | 0.60675700  | 4.28070100  |
| H | 3.58931800  | -1.58542100 | 1.30588000  |
| H | 0.60449000  | -1.47618700 | 3.34958300  |
| H | 5.01240900  | -0.91190500 | 2.10220000  |
| H | 1.92205800  | -0.92350300 | -0.32750600 |
| H | 0.80608700  | 1.87172800  | 3.11995900  |
| O | 0.55653400  | 1.51309900  | -1.99374900 |
| C | -0.33786200 | 2.36619200  | -1.24599700 |
| H | -0.41586800 | 2.03848500  | -0.20415000 |
| H | -1.32383200 | 2.35794100  | -1.71586300 |
| C | 0.23382300  | 3.78471200  | -1.29283100 |

|    |             |             |             |
|----|-------------|-------------|-------------|
| Cl | 1.84752600  | 3.84096300  | -0.50332500 |
| Cl | -0.92010000 | 4.83135500  | -0.39123000 |
| Cl | 0.37485900  | 4.36356900  | -2.98864400 |
| O  | -3.50555200 | 0.28214000  | 1.50226600  |
| C  | -3.67085500 | -0.67672900 | 0.46443000  |
| H  | -2.77790100 | -0.73387200 | -0.16558400 |
| H  | -3.90004600 | -1.66041100 | 0.88514100  |
| C  | -4.84707100 | -0.24207500 | -0.41493300 |
| Cl | -4.52685500 | 1.35160900  | -1.17724500 |
| Cl | -6.36085300 | -0.15437700 | 0.54510600  |
| Cl | -5.02611600 | -1.49909200 | -1.70269500 |

S44

0 imaginary frequency

H = -5446.723959

G = -5446.849253

Esol = -5447.486668

|    |             |             |             |
|----|-------------|-------------|-------------|
| Se | 0.42899800  | 0.76087200  | -0.31910600 |
| N  | -0.49175400 | 2.23165400  | -0.16986900 |
| N  | -0.56626400 | -0.36146100 | -1.27541900 |
| S  | -1.49795600 | 2.85494600  | -1.34048100 |
| O  | -0.95026000 | 2.60813100  | -2.68717500 |
| O  | -1.77118200 | 4.22841500  | -0.90254000 |
| S  | -0.23436500 | -1.94184400 | -0.90139900 |
| O  | 0.96152000  | -2.04036700 | -0.02633100 |
| O  | -0.27032000 | -2.75756600 | -2.12110500 |
| C  | -1.66372400 | -2.40288300 | 0.10353000  |
| C  | -2.17085100 | -1.50237500 | 1.04436500  |
| C  | -2.18325300 | -3.69117600 | -0.02864000 |

|   |             |             |             |
|---|-------------|-------------|-------------|
| C | -3.20649500 | -1.90133900 | 1.88176700  |
| H | -1.77551100 | -0.49454500 | 1.09856400  |
| C | -3.22176000 | -4.09564700 | 0.80797700  |
| H | -1.78246800 | -4.36020500 | -0.78203700 |
| C | -3.70952500 | -3.19524700 | 1.75187100  |
| H | -3.63009000 | -1.23342600 | 2.62122600  |
| H | -3.65375400 | -5.08626800 | 0.73919500  |
| N | -4.80048000 | -3.62377500 | 2.64806700  |
| O | -5.20567800 | -2.81073500 | 3.47715400  |
| O | -5.23069800 | -4.76717500 | 2.51362500  |
| C | -3.06419500 | 1.97037100  | -1.22943200 |
| C | -3.34714100 | 0.94652400  | -2.13475800 |
| C | -3.98061000 | 2.35671800  | -0.24706900 |
| C | -4.57168800 | 0.28786500  | -2.05278700 |
| H | -2.61485600 | 0.67056700  | -2.88285600 |
| C | -5.20287300 | 1.69692300  | -0.15800100 |
| H | -3.74447700 | 3.17760700  | 0.42098700  |
| C | -5.47478100 | 0.67276900  | -1.06412700 |
| H | -4.83335900 | -0.50934100 | -2.73722700 |
| H | -5.94361100 | 1.96657500  | 0.58439600  |
| N | -6.77203400 | -0.02482700 | -0.97653600 |
| O | -7.55670100 | 0.34074600  | -0.10292600 |
| O | -6.98743300 | -0.92954400 | -1.78118900 |
| C | 1.70455700  | 2.91950000  | 2.02142200  |
| C | 0.52957700  | 3.20107700  | 3.94351100  |
| C | 0.52145800  | 4.38221200  | 3.28386600  |
| H | 0.10079900  | 2.92256100  | 4.89342500  |
| H | 0.07454800  | 5.32845100  | 3.54551700  |
| N | 1.25719000  | 2.29700000  | 3.17014800  |
| N | 1.25270900  | 4.21774200  | 2.10917800  |

|   |            |             |             |
|---|------------|-------------|-------------|
| C | 1.47222000 | 0.88282800  | 3.41634900  |
| H | 1.28539800 | 0.33131600  | 2.49169400  |
| H | 2.49809800 | 0.68106500  | 3.74163500  |
| H | 0.77671800 | 0.54433300  | 4.18741200  |
| C | 1.36340800 | 5.17134600  | 1.01801800  |
| H | 0.44482100 | 5.18886400  | 0.42253700  |
| H | 1.56981600 | 6.16805200  | 1.41841700  |
| H | 2.19501400 | 4.85840500  | 0.38485200  |
| O | 2.36362700 | 2.39486800  | 1.10556800  |
| C | 3.64229600 | -0.29172200 | -2.15492200 |
| C | 3.91837700 | -0.23169800 | -0.63126000 |
| C | 5.26536500 | -0.87963400 | -0.18845800 |
| C | 5.36631300 | -2.28362600 | -0.79774800 |
| C | 5.04242900 | -2.39341100 | -2.27211500 |
| C | 3.68991200 | -1.75655100 | -2.63228200 |
| H | 3.90289400 | 0.80132400  | -0.27862800 |
| C | 5.25860600 | -0.97316800 | 1.37606700  |
| C | 5.70880100 | -3.36977900 | -0.09258900 |
| H | 5.82576600 | -1.90067700 | -2.86953300 |
| H | 2.87924300 | -2.31774800 | -2.15205300 |
| C | 6.07802500 | -3.37133700 | 1.36508600  |
| C | 6.33014100 | -1.95282600 | 1.88343700  |
| H | 5.72525000 | -4.33541800 | -0.59941200 |
| H | 5.27168200 | -3.84829000 | 1.94530900  |
| H | 7.32469500 | -1.61345800 | 1.56347300  |
| H | 3.53924400 | -1.82769500 | -3.71505700 |
| H | 6.96379700 | -4.00246800 | 1.52376000  |
| H | 6.34290400 | -1.94746900 | 2.98088000  |
| H | 4.28279300 | -1.40652000 | 1.64459600  |
| H | 3.09655600 | -0.75503900 | -0.12949100 |

|   |            |             |             |
|---|------------|-------------|-------------|
| C | 5.37348600 | 0.37909900  | 2.09866800  |
| H | 6.35820500 | 0.83757200  | 1.95001800  |
| H | 4.60995200 | 1.09655900  | 1.78131700  |
| H | 5.25334800 | 0.22757100  | 3.17896900  |
| C | 6.44773400 | -0.01301000 | -0.69129200 |
| H | 4.45855100 | 0.24973100  | -2.67071900 |
| C | 2.40409600 | 0.47585500  | -2.57472700 |
| C | 1.55467100 | -0.02547200 | -3.69063100 |
| H | 0.81684900 | 0.71531100  | -4.00306400 |
| H | 2.15656200 | -0.34182100 | -4.55021400 |
| C | 1.99645800 | 1.62866500  | -1.92486500 |
| H | 2.59417500 | 2.09325400  | -1.14768000 |
| H | 6.32949700 | 1.03382100  | -0.39063100 |
| H | 7.40101000 | -0.37569900 | -0.29345400 |
| H | 6.53320300 | -0.03162500 | -1.78258400 |
| H | 5.04530900 | -3.44641800 | -2.57506800 |
| H | 1.24400500 | 2.25070000  | -2.40265500 |
| H | 1.00383500 | -0.92237300 | -3.35717300 |

S45

0 imaginary frequency

H = -5446.760841

G = -5446.885001

Esol = -5447.524695

|    |             |             |             |
|----|-------------|-------------|-------------|
| Se | 0.61358000  | 0.20049500  | -0.56128800 |
| N  | -0.99206400 | 0.94080200  | -0.26860000 |
| N  | 0.21323900  | -1.29017700 | -1.69937500 |
| S  | -1.74980000 | 1.52515700  | -1.60688200 |
| O  | -1.74344800 | 0.53505600  | -2.71790800 |

|   |             |             |             |
|---|-------------|-------------|-------------|
| O | -1.32316700 | 2.89389800  | -1.96223100 |
| S | 0.42809300  | -2.82819700 | -1.10572800 |
| O | 1.40255600  | -2.68387200 | -0.01840700 |
| O | 0.66800100  | -3.73005300 | -2.23043100 |
| C | -1.14757400 | -3.32211100 | -0.37343700 |
| C | -1.91552800 | -2.39648600 | 0.33734400  |
| C | -1.53475300 | -4.65911500 | -0.49088400 |
| C | -3.09052300 | -2.81896400 | 0.95203900  |
| H | -1.62159100 | -1.35333600 | 0.38959900  |
| C | -2.70836700 | -5.08544400 | 0.12622800  |
| H | -0.92815900 | -5.34873400 | -1.06716000 |
| C | -3.46321000 | -4.15692600 | 0.83926900  |
| H | -3.71804400 | -2.13234100 | 1.50629700  |
| H | -3.04438000 | -6.11268500 | 0.05927400  |
| N | -4.70751200 | -4.60420300 | 1.49445400  |
| O | -5.35236100 | -3.76517700 | 2.12105500  |
| O | -5.01995200 | -5.78700200 | 1.37424200  |
| C | -3.43237600 | 1.62911200  | -0.97656300 |
| C | -4.45190900 | 1.00230200  | -1.69303800 |
| C | -3.69951100 | 2.38561300  | 0.16914800  |
| C | -5.76980700 | 1.12594600  | -1.25547700 |
| H | -4.20831700 | 0.42619200  | -2.57867400 |
| C | -5.01209900 | 2.50529700  | 0.61278100  |
| H | -2.89146600 | 2.86401500  | 0.71221800  |
| C | -6.02499900 | 1.87475700  | -0.11009200 |
| H | -6.59052900 | 0.65619800  | -1.78317400 |
| H | -5.26419000 | 3.07612900  | 1.49772100  |
| N | -7.41783800 | 2.00921100  | 0.35686600  |
| O | -7.61422100 | 2.67004700  | 1.37575600  |
| O | -8.29506000 | 1.45396300  | -0.30132700 |



|   |             |             |             |
|---|-------------|-------------|-------------|
| C | 0.78478800  | 2.82745600  | 1.45874300  |
| C | -0.66891900 | 3.27908000  | 3.13432100  |
| C | -0.63048000 | 4.36453700  | 2.32396300  |
| H | -1.22096700 | 3.10025000  | 4.04372500  |
| H | -1.13961700 | 5.31295600  | 2.39543500  |
| N | 0.20511900  | 2.33291100  | 2.60625500  |
| N | 0.27130200  | 4.09174600  | 1.29824100  |
| C | 0.44431500  | 0.98320900  | 3.08788200  |
| H | 0.64156100  | 0.34354800  | 2.22738000  |
| H | 1.30423700  | 0.94220600  | 3.76497900  |
| H | -0.44523200 | 0.62175500  | 3.60868400  |
| C | 0.55289900  | 4.91899400  | 0.13414500  |
| H | -0.09834900 | 4.64328600  | -0.70101200 |
| H | 0.40304000  | 5.96848600  | 0.39804200  |
| H | 1.59447400  | 4.76707500  | -0.15599600 |
| O | 1.61160100  | 2.24949300  | 0.72309600  |
| C | 3.99823600  | 0.86759500  | -1.37209500 |
| C | 4.13073000  | -0.28206700 | -0.34296100 |
| C | 5.23292900  | -0.08863400 | 0.74122100  |
| C | 6.54056400  | 0.32261900  | 0.05018300  |
| C | 6.43398300  | 1.41776000  | -0.99183000 |
| C | 5.35790900  | 1.11290000  | -2.04682200 |
| H | 3.16734300  | -0.43248600 | 0.15345500  |
| C | 5.42877300  | -1.45577000 | 1.48048600  |
| C | 7.72458300  | -0.24023500 | 0.32786000  |
| H | 6.18391800  | 2.37537000  | -0.50946000 |
| H | 5.66169800  | 0.22161500  | -2.61144700 |
| C | 7.95355000  | -1.31106500 | 1.35974600  |
| C | 6.74125800  | -1.47866600 | 2.28114500  |
| H | 8.60272000  | 0.09439900  | -0.22647300 |

|   |             |             |             |
|---|-------------|-------------|-------------|
| H | 8.17696200  | -2.26463700 | 0.85419700  |
| H | 6.73385000  | -0.67736000 | 3.03242800  |
| H | 5.28259200  | 1.93780700  | -2.76650400 |
| H | 8.85334200  | -1.07556400 | 1.94574800  |
| H | 6.81718100  | -2.42133600 | 2.83808000  |
| H | 5.53138900  | -2.21352400 | 0.68852500  |
| H | 4.33696400  | -1.20638700 | -0.89872700 |
| C | 4.24072100  | -1.88096300 | 2.35708200  |
| H | 4.10963900  | -1.21271400 | 3.21676300  |
| H | 3.30133400  | -1.91421900 | 1.79678200  |
| H | 4.41561700  | -2.88804600 | 2.75380500  |
| C | 4.80548100  | 1.02889000  | 1.72614600  |
| H | 3.72518800  | 1.78084900  | -0.82775300 |
| C | 2.87054400  | 0.58134800  | -2.36088400 |
| C | 3.01628600  | -0.17339900 | -3.45961500 |
| H | 2.18211700  | -0.37822200 | -4.12414100 |
| H | 3.96873700  | -0.61547500 | -3.73466700 |
| C | 1.53161400  | 1.18726100  | -2.07983100 |
| H | 1.56956100  | 2.19974700  | -1.68133600 |
| H | 3.80305700  | 0.84423200  | 2.12423200  |
| H | 5.50598900  | 1.10539800  | 2.56440800  |
| H | 4.77253400  | 2.00781900  | 1.23975200  |
| H | 7.40668800  | 1.56346900  | -1.47617800 |
| H | 0.83352600  | 1.11202500  | -2.91282800 |
| H | -0.54080400 | -1.12777800 | -2.37333500 |

S46

0 imaginary frequency

H = -5446.733626

G = -5446.860419

Esol = -5447.496457

|    |             |             |             |
|----|-------------|-------------|-------------|
| Se | 0.05094000  | 0.32018200  | -1.32075800 |
| N  | 0.44474000  | 1.79360000  | -0.53885100 |
| N  | -0.46355700 | -0.80063800 | -0.08174000 |
| S  | 0.97608000  | 1.88857600  | 1.04350700  |
| O  | 1.67623200  | 0.66479600  | 1.47553400  |
| O  | -0.07232400 | 2.44325800  | 1.90520900  |
| S  | -0.82217200 | -2.32976700 | -0.62076600 |
| O  | -0.32701200 | -2.55294700 | -2.00207900 |
| O  | -2.22993200 | -2.63919800 | -0.34617400 |
| C  | 0.18271800  | -3.34143100 | 0.48269400  |
| C  | 0.42630800  | -4.66054700 | 0.08726900  |
| C  | 0.64010200  | -2.84352400 | 1.70557500  |
| C  | 1.14002400  | -5.50477800 | 0.93171700  |
| H  | 0.06830300  | -5.01691900 | -0.87269700 |
| C  | 1.35750400  | -3.68838100 | 2.55175000  |
| H  | 0.46194500  | -1.80834000 | 1.97524100  |
| C  | 1.59335400  | -5.00190200 | 2.15072700  |
| H  | 1.34973900  | -6.53294800 | 0.66439200  |
| H  | 1.73114100  | -3.34298100 | 3.50785100  |
| N  | 2.36310600  | -5.89123200 | 3.04092100  |
| O  | 2.75805100  | -5.42593700 | 4.10823500  |
| O  | 2.56816900  | -7.04188000 | 2.65650200  |
| C  | 2.23068500  | 3.16386800  | 0.81471600  |
| C  | 2.14607100  | 4.32717600  | 1.57765900  |
| C  | 3.28590400  | 2.93732300  | -0.07409300 |
| C  | 3.14283000  | 5.29440600  | 1.45423200  |
| H  | 1.30810300  | 4.46853100  | 2.25106600  |
| C  | 4.28014600  | 3.90115300  | -0.20090800 |

|   |             |             |             |
|---|-------------|-------------|-------------|
| H | 3.31605400  | 2.02751400  | -0.66553100 |
| C | 4.19083500  | 5.06243000  | 0.56785800  |
| H | 3.11702700  | 6.21338300  | 2.02640000  |
| H | 5.11387000  | 3.77309400  | -0.87986900 |
| N | 5.24632000  | 6.08384000  | 0.43295600  |
| O | 6.16283700  | 5.85462500  | -0.35518300 |
| O | 5.14626300  | 7.10104300  | 1.11655300  |
| C | 2.79000200  | -1.34524200 | -1.84118700 |
| C | 3.87638800  | -3.28126800 | -1.47273700 |
| C | 3.33440100  | -3.34763300 | -2.71409500 |
| H | 4.47145900  | -3.99542900 | -0.92577900 |
| H | 3.35642400  | -4.13610200 | -3.44971700 |
| N | 3.53210600  | -2.04939800 | -0.93029900 |
| N | 2.67617700  | -2.14799100 | -2.94566400 |
| C | 3.95080400  | -1.52293200 | 0.36346800  |
| H | 3.89478300  | -2.31989300 | 1.10844900  |
| H | 4.97816100  | -1.14695900 | 0.31108900  |
| H | 3.27621600  | -0.71548300 | 0.65132700  |
| C | 1.87557400  | -1.80349100 | -4.11010700 |
| H | 2.46170300  | -1.94592000 | -5.02211600 |
| H | 0.96945600  | -2.41269400 | -4.13557400 |
| H | 1.59586200  | -0.75350900 | -4.01915700 |
| O | 2.34602600  | -0.17135100 | -1.71046500 |
| C | -3.78723700 | 0.42791500  | -1.62478100 |
| C | -3.71918300 | 1.29944300  | -0.35640600 |
| C | -4.73176800 | 0.91941300  | 0.77010500  |
| C | -6.13007000 | 0.80082400  | 0.14543100  |
| C | -6.22983200 | -0.01997300 | -1.12294500 |
| C | -5.22612700 | 0.43969300  | -2.19150600 |
| H | -2.69504300 | 1.26079700  | 0.03261300  |

|   |             |             |             |
|---|-------------|-------------|-------------|
| C | -4.72348600 | 2.06194000  | 1.84332100  |
| C | -7.22127900 | 1.38636300  | 0.65798000  |
| H | -6.03605900 | -1.08062400 | -0.90291800 |
| H | -5.47225000 | 1.46034300  | -2.51579900 |
| C | -7.25323600 | 2.19539900  | 1.92542900  |
| C | -5.97161400 | 2.00537200  | 2.73998500  |
| H | -8.16960700 | 1.27033600  | 0.13085400  |
| H | -7.39107500 | 3.26127600  | 1.67982400  |
| H | -6.00715000 | 1.03987900  | 3.26259400  |
| H | -5.30501500 | -0.20650500 | -3.07418200 |
| H | -8.13456100 | 1.91812400  | 2.52135900  |
| H | -5.89877500 | 2.77473300  | 3.51949900  |
| H | -4.78496400 | 3.00667300  | 1.27990000  |
| H | -3.91577900 | 2.34282300  | -0.63849900 |
| C | -3.45027300 | 2.12054500  | 2.69997200  |
| H | -3.39153800 | 1.27227000  | 3.39200300  |
| H | -2.53231900 | 2.13127500  | 2.10687600  |
| H | -3.45544800 | 3.03305800  | 3.30858100  |
| C | -4.33066700 | -0.43721800 | 1.40142500  |
| C | -2.78561800 | 0.82002200  | -2.70151300 |
| C | -2.51539300 | -0.21446700 | -3.76983400 |
| H | -3.43662800 | -0.50092500 | -4.29122000 |
| H | -1.80954200 | 0.15807100  | -4.51966500 |
| H | -2.10566800 | -1.13613300 | -3.33671700 |
| C | -2.15056300 | 2.00690300  | -2.73511300 |
| H | -1.46894600 | 2.25488700  | -3.54626900 |
| H | -2.29285700 | 2.77298600  | -1.98151900 |
| H | -4.41306800 | -1.26402800 | 0.69170600  |
| H | -3.29086100 | -0.41817600 | 1.74228600  |
| H | -4.97067000 | -0.67580300 | 2.25780400  |

|   |             |             |             |
|---|-------------|-------------|-------------|
| H | -7.25087400 | 0.03205100  | -1.51951200 |
| H | -3.55857700 | -0.61082400 | -1.34591000 |

S49

0 imaginary frequency

H = -5446.757695

G = -5446.883412

Esol = -5447.520826

|    |             |             |             |
|----|-------------|-------------|-------------|
| Se | 0.33734400  | 0.42297300  | -1.10653900 |
| N  | 0.60139100  | 1.74428900  | 0.05678100  |
| N  | 0.27197500  | -1.15390500 | -0.11401200 |
| S  | -0.35004900 | 1.81966600  | 1.40071000  |
| O  | 0.47190700  | 2.36007900  | 2.48614000  |
| O  | -1.09571200 | 0.55077100  | 1.63072600  |
| S  | 1.37819100  | -2.37544400 | -0.37886700 |
| O  | 1.82884200  | -2.18766900 | -1.76089000 |
| O  | 0.75993600  | -3.62850700 | 0.05450200  |
| C  | 2.75041000  | -2.04924400 | 0.74254600  |
| C  | 3.43714600  | -3.14799400 | 1.26625900  |
| C  | 3.12388600  | -0.73614800 | 1.03593800  |
| C  | 4.53682400  | -2.92987900 | 2.09147100  |
| H  | 3.10470800  | -4.15525500 | 1.04121200  |
| C  | 4.22112500  | -0.51770700 | 1.86471200  |
| H  | 2.57168300  | 0.10597000  | 0.63865300  |
| C  | 4.90998400  | -1.61689500 | 2.37198400  |
| H  | 5.09706800  | -3.75123200 | 2.52026400  |
| H  | 4.53850000  | 0.48421400  | 2.12424400  |
| N  | 6.07804200  | -1.38311200 | 3.24349800  |
| O  | 6.39784400  | -0.21700800 | 3.46521900  |

|   |             |             |             |
|---|-------------|-------------|-------------|
| O | 6.66114800  | -2.36988500 | 3.68934300  |
| C | -1.61463700 | 3.05759200  | 1.03362200  |
| C | -2.92198300 | 2.84021800  | 1.47444600  |
| C | -1.25540700 | 4.24183500  | 0.38259900  |
| C | -3.89185400 | 3.81558100  | 1.25145100  |
| H | -3.17167300 | 1.91457400  | 1.98138700  |
| C | -2.22004000 | 5.21811900  | 0.15475200  |
| H | -0.23428000 | 4.38934000  | 0.04812300  |
| C | -3.52327100 | 4.98677500  | 0.59420600  |
| H | -4.91638800 | 3.68302100  | 1.57634300  |
| H | -1.98275900 | 6.14576700  | -0.35104000 |
| N | -4.54877400 | 6.01744300  | 0.34924900  |
| O | -4.19842300 | 7.04085500  | -0.23633200 |
| O | -5.69102700 | 5.78944300  | 0.74392300  |
| C | 4.31723500  | 1.31472000  | -1.88140700 |
| C | 6.18197600  | 2.60724700  | -1.71151000 |
| C | 6.54408200  | 1.45729000  | -2.32499500 |
| H | 6.76751000  | 3.47265000  | -1.44281100 |
| H | 7.50482400  | 1.13181900  | -2.69249000 |
| N | 4.81770600  | 2.52648800  | -1.43288000 |
| N | 5.40660900  | 0.65749300  | -2.42952700 |
| C | 3.99217800  | 3.52589000  | -0.78166800 |
| H | 4.39423700  | 3.77732600  | 0.20562600  |
| H | 3.93213300  | 4.43889300  | -1.38544800 |
| H | 2.99269600  | 3.10183300  | -0.66337700 |
| C | 5.30979200  | -0.66662300 | -3.01347700 |
| H | 6.04223700  | -1.34187300 | -2.55849500 |
| H | 4.30280700  | -1.03981900 | -2.81619700 |
| H | 5.47774100  | -0.63454900 | -4.09616000 |
| O | 3.15406000  | 0.90438500  | -1.80969400 |

|   |             |             |             |
|---|-------------|-------------|-------------|
| C | -2.98986300 | -1.64491500 | -1.99440700 |
| C | -3.94536200 | -1.42933100 | -0.83689200 |
| C | -4.09405200 | -2.63018700 | 0.15909500  |
| C | -4.31288200 | -3.91059900 | -0.65455300 |
| C | -3.37452100 | -4.12125400 | -1.82182500 |
| C | -3.34003600 | -2.89799400 | -2.76723800 |
| H | -3.70296400 | -0.53178900 | -0.26525700 |
| C | -5.33713500 | -2.35484500 | 1.07071900  |
| C | -5.27725200 | -4.79996400 | -0.38143300 |
| H | -2.35181400 | -4.30613400 | -1.46418800 |
| H | -4.34068000 | -2.77696500 | -3.20992600 |
| C | -6.24119800 | -4.70214900 | 0.76927800  |
| C | -5.80659100 | -3.63652500 | 1.77931600  |
| H | -5.37964500 | -5.67185500 | -1.02882800 |
| H | -7.24869800 | -4.47171800 | 0.38622400  |
| H | -4.99491200 | -4.03001300 | 2.40558900  |
| H | -2.64646700 | -3.09652700 | -3.58633200 |
| H | -6.33393300 | -5.68109200 | 1.26012200  |
| H | -6.63416300 | -3.39963700 | 2.46011700  |
| H | -6.15131700 | -2.05361600 | 0.39260500  |
| H | -4.93734200 | -1.25036500 | -1.28137700 |
| C | -5.14636600 | -1.21888100 | 2.08837000  |
| H | -4.42801100 | -1.48914900 | 2.87012000  |
| H | -4.79830500 | -0.29005500 | 1.62260100  |
| H | -6.09990900 | -0.99831900 | 2.58236400  |
| C | -2.79768400 | -2.76412700 | 0.99342000  |
| C | -1.99063100 | -0.80343800 | -2.35176200 |
| C | -1.12967500 | -0.96722600 | -3.59158500 |
| H | -1.56902400 | -1.63531700 | -4.33268500 |
| H | -0.98060300 | 0.00478000  | -4.08145700 |



|   |             |             |             |
|---|-------------|-------------|-------------|
| H | -0.13216800 | -1.35874300 | -3.34930000 |
| C | -1.64244300 | 0.41896900  | -1.55977500 |
| H | -1.68227200 | 1.33565200  | -2.16096300 |
| H | -2.17667300 | 0.55602000  | -0.62518000 |
| H | -1.94268800 | -3.03231100 | 0.36738300  |
| H | -2.55589700 | -1.82257400 | 1.49911400  |
| H | -2.89808200 | -3.54385200 | 1.75554200  |
| H | -3.67519700 | -5.01108800 | -2.38674900 |
| H | -0.20801800 | -1.08710400 | 0.78829300  |

S5

0 imaginary frequency

H = -8086.537555

G = -8086.670459

Esol = -8087.410087

|    |             |            |             |
|----|-------------|------------|-------------|
| Se | -0.29823900 | 1.99072700 | 0.34356600  |
| N  | -1.92847900 | 1.88988600 | -0.32154800 |
| N  | 0.38344400  | 2.81927000 | -1.05839300 |
| S  | -3.00722600 | 1.14429700 | 0.66892300  |
| O  | -3.95609400 | 2.08160200 | 1.28823700  |
| O  | -2.32662800 | 0.18256700 | 1.58285500  |
| S  | 1.95981000  | 3.26345400 | -0.82693600 |
| O  | 2.37942900  | 3.10122000 | 0.58798300  |
| O  | 2.17093600  | 4.55249200 | -1.48920200 |
| C  | -0.53068000 | 4.58631400 | 2.07538200  |
| C  | -1.57983600 | 4.75739400 | 1.25480500  |
| C  | -1.52315800 | 5.36924400 | -0.11265700 |
| H  | -2.56417800 | 4.41988600 | 1.58241700  |
| H  | -0.49004500 | 5.62936400 | -0.36808300 |

|   |             |             |             |
|---|-------------|-------------|-------------|
| H | -1.84374700 | 4.61056300  | -0.84037100 |
| H | -0.65163000 | 4.15784900  | 3.06747300  |
| H | 0.47420900  | 4.89800600  | 1.79967300  |
| C | -2.43133400 | 6.60480900  | -0.23701800 |
| H | -2.40116900 | 7.00256000  | -1.25721800 |
| H | -3.47394900 | 6.35744200  | -0.00384700 |
| H | -2.11442000 | 7.40032500  | 0.44680300  |
| C | 2.86317500  | 2.00786900  | -1.76302600 |
| C | 4.00852900  | 1.44707800  | -1.19731800 |
| C | 2.41448000  | 1.62747000  | -3.03145300 |
| C | 4.70600900  | 0.46482100  | -1.89532000 |
| H | 4.33201100  | 1.76879800  | -0.21385000 |
| C | 3.10614700  | 0.64556200  | -3.73369900 |
| H | 1.52165700  | 2.07893100  | -3.45021900 |
| C | 4.23245800  | 0.07059000  | -3.14519600 |
| H | 5.59459700  | -0.00081600 | -1.48749700 |
| H | 2.78412000  | 0.31370100  | -4.71294800 |
| N | 4.93823300  | -1.00355800 | -3.86257900 |
| O | 5.84014300  | -1.59337800 | -3.26377900 |
| O | 4.58172600  | -1.25597700 | -5.01149600 |
| C | -3.93019500 | 0.20151600  | -0.56242600 |
| C | -5.32280400 | 0.18982300  | -0.48892800 |
| C | -3.23914600 | -0.51654000 | -1.54318600 |
| C | -6.04733000 | -0.56295900 | -1.41168200 |
| H | -5.82518100 | 0.77729800  | 0.27147600  |
| C | -3.95850600 | -1.26768000 | -2.46691100 |
| H | -2.15504000 | -0.47825000 | -1.57722000 |
| C | -5.35106500 | -1.27908400 | -2.38201100 |
| H | -7.12949100 | -0.59721500 | -1.39313200 |
| H | -3.46469800 | -1.83413500 | -3.24651800 |

|   |             |             |             |
|---|-------------|-------------|-------------|
| N | -6.11382900 | -2.07899500 | -3.35836400 |
| O | -5.47562800 | -2.71153500 | -4.19868800 |
| O | -7.34040800 | -2.06846800 | -3.27009400 |
| P | 0.75624900  | -1.64207200 | 1.39663600  |
| C | 4.68268600  | -3.73231400 | -0.22110400 |
| C | 3.38459200  | -4.54557000 | -0.16373800 |
| C | 2.15136600  | -3.64424200 | 0.01184400  |
| C | 2.27312900  | -2.73378500 | 1.26073100  |
| C | 3.58888900  | -1.92629600 | 1.20937400  |
| C | 4.81236700  | -2.83957500 | 1.01798600  |
| H | 4.69316400  | -3.10995600 | -1.12646400 |
| H | 5.54679700  | -4.40304500 | -0.29666700 |
| H | 3.43470300  | -5.25771200 | 0.67324100  |
| H | 2.03235000  | -3.00441300 | -0.87296600 |
| H | 2.26616900  | -3.35869600 | 2.16540300  |
| H | 3.52022500  | -1.20726100 | 0.38316100  |
| H | 3.71844600  | -1.34722800 | 2.12724500  |
| H | 4.93491100  | -3.46991000 | 1.91131100  |
| H | 5.71397600  | -2.21835000 | 0.95194100  |
| H | 3.26257500  | -5.14338900 | -1.07498200 |
| H | 1.25257400  | -4.26597800 | 0.07163700  |
| C | -2.57295900 | -5.06616200 | 1.60112400  |
| C | -2.80438400 | -3.83611100 | 0.71197700  |
| C | -1.48978500 | -3.11323000 | 0.37912500  |
| C | -0.75071200 | -2.72397900 | 1.67524900  |
| C | -0.47136800 | -3.97913800 | 2.53564700  |
| C | -1.79140200 | -4.69827200 | 2.87002500  |
| H | -2.00856300 | -5.82268700 | 1.03619400  |
| H | -3.53092300 | -5.52782800 | 1.86918800  |
| H | -3.47569300 | -3.13218700 | 1.22346400  |

|    |             |             |             |
|----|-------------|-------------|-------------|
| H  | -0.85728000 | -3.76787800 | -0.23502700 |
| H  | -1.41773300 | -2.04961800 | 2.22842000  |
| H  | 0.17689500  | -4.67002400 | 1.98131700  |
| H  | 0.05684200  | -3.72823900 | 3.46165200  |
| H  | -2.40674400 | -4.04417000 | 3.50406500  |
| H  | -1.57532100 | -5.59624400 | 3.46198500  |
| H  | -3.30574500 | -4.12696500 | -0.21909400 |
| H  | -1.68598200 | -2.21787200 | -0.21095000 |
| C  | 1.42464400  | 1.18406800  | 5.21273300  |
| C  | 0.38583700  | 0.05508000  | 5.27047900  |
| C  | 0.65299600  | -1.05216700 | 4.23046900  |
| C  | 0.75575000  | -0.43121300 | 2.82145000  |
| C  | 1.87467900  | 0.62986600  | 2.78435100  |
| C  | 1.56479400  | 1.74572600  | 3.79153200  |
| H  | 2.40027600  | 0.79865300  | 5.54423100  |
| H  | 1.14951600  | 1.97996700  | 5.91538900  |
| H  | -0.61394500 | 0.47084800  | 5.08277800  |
| H  | 1.58685000  | -1.57802700 | 4.47594000  |
| H  | -0.19684500 | 0.07801500  | 2.61427900  |
| H  | 2.83152400  | 0.16938600  | 3.05650700  |
| H  | 1.99672400  | 1.04551700  | 1.78273300  |
| H  | 0.63650800  | 2.24539200  | 3.48451400  |
| H  | 2.35461800  | 2.50373400  | 3.74639600  |
| H  | 0.35741700  | -0.39062100 | 6.27246100  |
| H  | -0.15724000 | -1.78515500 | 4.28547100  |
| Se | 0.64118900  | -0.46111500 | -0.46312700 |

S6

0 imaginary frequency

H = -8086.552228

G = -8086.683159

Esol = -8087.424577

|    |             |             |             |
|----|-------------|-------------|-------------|
| Se | -0.24978800 | -0.61777800 | -1.09774600 |
| N  | -1.95607300 | 0.28671600  | -1.72105700 |
| N  | -1.06091700 | -2.09521500 | -0.48542100 |
| S  | -1.69133200 | 1.78513600  | -2.38231100 |
| O  | -2.49143800 | 1.96128900  | -3.60071000 |
| O  | -0.22874600 | 1.99305600  | -2.42904200 |
| S  | -1.43532100 | -1.94765900 | 1.11061500  |
| O  | -1.29546000 | -0.53422900 | 1.56471200  |
| O  | -0.79568400 | -2.99600300 | 1.91550300  |
| C  | 0.15939500  | -1.52404100 | -2.87426300 |
| C  | -1.03646600 | -1.68288900 | -3.74011600 |
| C  | -1.81779900 | -2.77330800 | -3.72262600 |
| H  | -1.26403800 | -0.86676700 | -4.42540500 |
| H  | -1.57894500 | -3.57192900 | -3.02079300 |
| H  | 0.94098600  | -0.90432200 | -3.31572900 |
| H  | 0.57268700  | -2.46819700 | -2.52520100 |
| C  | -3.01072300 | -2.98802600 | -4.60387800 |
| H  | -2.87779100 | -3.88157200 | -5.22836800 |
| H  | -3.91465200 | -3.16099000 | -4.00496300 |
| H  | -3.19175100 | -2.13287000 | -5.26308300 |
| C  | -3.20595300 | -2.32291800 | 1.13274600  |
| C  | -3.62958000 | -3.55143600 | 1.64053800  |
| C  | -4.12083800 | -1.37742500 | 0.65951400  |
| C  | -4.99057300 | -3.85055800 | 1.66714500  |
| H  | -2.89378300 | -4.25454200 | 2.01412500  |
| C  | -5.48060100 | -1.66825100 | 0.68529000  |
| H  | -3.76916900 | -0.42648200 | 0.27402400  |

|   |             |             |             |
|---|-------------|-------------|-------------|
| C | -5.89205900 | -2.90378800 | 1.18698800  |
| H | -5.35820700 | -4.79339500 | 2.05266500  |
| H | -6.22103100 | -0.96253300 | 0.32962500  |
| N | -7.33130700 | -3.21647400 | 1.21005900  |
| O | -7.67179700 | -4.31033700 | 1.65920200  |
| O | -8.10769700 | -2.36566300 | 0.77619200  |
| C | -2.33106300 | 2.89619600  | -1.11930000 |
| C | -2.88222500 | 4.11274400  | -1.52519100 |
| C | -2.21343700 | 2.55146800  | 0.23087200  |
| C | -3.31892000 | 5.01661300  | -0.55949700 |
| H | -2.98033600 | 4.33888800  | -2.58145500 |
| C | -2.65285700 | 3.45306500  | 1.19642000  |
| H | -1.81649300 | 1.58460100  | 0.52361900  |
| C | -3.19185100 | 4.67107000  | 0.78416700  |
| H | -3.75548500 | 5.97009200  | -0.82929700 |
| H | -2.59061700 | 3.22143100  | 2.25249300  |
| N | -3.65101600 | 5.62799900  | 1.80854600  |
| O | -3.52055500 | 5.30518400  | 2.98798600  |
| O | -4.13231700 | 6.69106500  | 1.41982400  |
| P | 3.53360500  | -0.21258600 | 0.47251700  |
| C | 1.84739800  | 2.52787100  | 3.98179300  |
| C | 3.21006300  | 1.84417600  | 4.17307800  |
| C | 3.84219200  | 1.41989000  | 2.83286800  |
| C | 2.85992600  | 0.52757600  | 2.04609600  |
| C | 1.53557200  | 1.28241300  | 1.79821800  |
| C | 0.89193500  | 1.67166800  | 3.13675300  |
| H | 1.99876200  | 3.49695700  | 3.48325300  |
| H | 1.40043000  | 2.74827400  | 4.95886800  |
| H | 3.08481900  | 0.95061500  | 4.80121800  |
| H | 4.07980500  | 2.31634400  | 2.24216100  |

|   |             |             |             |
|---|-------------|-------------|-------------|
| H | 2.62383100  | -0.36050800 | 2.64763100  |
| H | 1.73729700  | 2.20043300  | 1.22780100  |
| H | 0.85160500  | 0.67488800  | 1.20241000  |
| H | 0.61094000  | 0.75944800  | 3.67851800  |
| H | -0.04011200 | 2.21756100  | 2.94860300  |
| H | 3.89912500  | 2.50881800  | 4.70901700  |
| H | 4.79087400  | 0.90380000  | 3.02229100  |
| C | 4.67425800  | 2.69309400  | -3.13212300 |
| C | 5.23596800  | 3.00963300  | -1.73929600 |
| C | 5.18537200  | 1.77842000  | -0.81720600 |
| C | 3.74574500  | 1.22601100  | -0.72684200 |
| C | 3.14942100  | 0.92370500  | -2.11585100 |
| C | 3.24355800  | 2.14610000  | -3.04098600 |
| H | 5.32157500  | 1.95061100  | -3.62227600 |
| H | 4.69788800  | 3.59129400  | -3.76118200 |
| H | 4.65382000  | 3.82576800  | -1.28732400 |
| H | 5.85914300  | 1.01117800  | -1.21737700 |
| H | 3.12616300  | 2.01465900  | -0.28064800 |
| H | 3.66137600  | 0.06001000  | -2.56099200 |
| H | 2.10221600  | 0.64348600  | -1.98777200 |
| H | 2.56977100  | 2.92782500  | -2.66515700 |
| H | 2.87055700  | 1.87695100  | -4.03643600 |
| H | 6.27099000  | 3.36630200  | -1.81180200 |
| H | 5.56223500  | 2.04452700  | 0.17809400  |
| C | 6.93938200  | -3.41245300 | 1.13888900  |
| C | 6.39193600  | -2.67065400 | 2.36481200  |
| C | 5.05811100  | -1.96739600 | 2.06178000  |
| C | 5.18324700  | -1.01120400 | 0.85128100  |
| C | 5.73265900  | -1.77234100 | -0.37864000 |
| C | 7.06738500  | -2.46597400 | -0.06156700 |

|    |             |             |             |
|----|-------------|-------------|-------------|
| H  | 6.25933000  | -4.23631100 | 0.87962300  |
| H  | 7.91040800  | -3.86650400 | 1.37180300  |
| H  | 7.12854700  | -1.92447200 | 2.69806600  |
| H  | 4.28266700  | -2.71166500 | 1.83867000  |
| H  | 5.87307600  | -0.19486200 | 1.10705000  |
| H  | 4.98703900  | -2.51553400 | -0.68653100 |
| H  | 5.86075800  | -1.09440500 | -1.23014900 |
| H  | 7.83480600  | -1.70679600 | 0.15078300  |
| H  | 7.40883600  | -3.01460700 | -0.94807800 |
| H  | 6.25081600  | -3.36462100 | 3.20242100  |
| H  | 4.72483600  | -1.42394000 | 2.95298200  |
| H  | -2.52545800 | -0.29991400 | -2.33503000 |
| Se | 2.21642100  | -1.80305300 | -0.20721900 |

S7

0 imaginary frequency

H = -8086.571703

G = -8086.702064

Esol = -8087.445323

|    |             |             |             |
|----|-------------|-------------|-------------|
| Se | 0.08897000  | -1.17797600 | -0.89295800 |
| N  | -1.76958900 | -1.10243500 | -1.87425700 |
| N  | 0.09236600  | -3.04514000 | -0.90919100 |
| S  | -1.93635600 | 0.39675200  | -2.54324800 |
| O  | -2.09905500 | 0.34949900  | -4.00293400 |
| O  | -0.86828300 | 1.24091600  | -1.95449700 |
| S  | -0.03970600 | -3.86088500 | 0.59663800  |
| O  | 1.13250300  | -3.62466500 | 1.44845500  |
| O  | -0.44100100 | -5.23619400 | 0.27901400  |
| C  | 3.25535500  | -4.65994200 | -1.87500800 |



|   |             |             |             |
|---|-------------|-------------|-------------|
| C | 2.40529600  | -3.65288100 | -1.67930700 |
| C | 0.91955700  | -3.76497800 | -1.93809000 |
| H | 2.76585700  | -2.69940300 | -1.29851200 |
| H | 0.61757000  | -4.81372900 | -1.85252200 |
| H | 4.32124400  | -4.54536900 | -1.69887000 |
| H | 2.92349700  | -5.64011700 | -2.21321400 |
| C | 0.52323900  | -3.27213400 | -3.33565000 |
| H | 1.09852900  | -3.82207600 | -4.08578100 |
| H | -0.54169300 | -3.45261100 | -3.52060400 |
| H | 0.73164200  | -2.20611200 | -3.45953800 |
| C | -1.42844300 | -3.00740400 | 1.35704700  |
| C | -2.69957800 | -3.56363600 | 1.22977700  |
| C | -1.19294400 | -1.83971200 | 2.08995300  |
| C | -3.78120300 | -2.93123300 | 1.83980100  |
| H | -2.83362200 | -4.48271600 | 0.67030900  |
| C | -2.27565600 | -1.19306100 | 2.67756000  |
| H | -0.18472500 | -1.44733200 | 2.17891400  |
| C | -3.54835600 | -1.74828000 | 2.53541600  |
| H | -4.78610300 | -3.32936500 | 1.77429000  |
| H | -2.15072200 | -0.27509800 | 3.23843300  |
| N | -4.69634700 | -1.04737800 | 3.13818800  |
| O | -5.75848500 | -1.65714800 | 3.22287400  |
| O | -4.51838800 | 0.11497900  | 3.50897100  |
| C | -3.47936600 | 1.01167200  | -1.84454800 |
| C | -4.38534500 | 1.66678400  | -2.67733000 |
| C | -3.70429400 | 0.88486900  | -0.47019500 |
| C | -5.54146700 | 2.21617000  | -2.12490800 |
| H | -4.18467600 | 1.73817000  | -3.74059400 |
| C | -4.85361700 | 1.43539200  | 0.08808300  |
| H | -2.99360500 | 0.34113300  | 0.14281600  |

|   |             |            |             |
|---|-------------|------------|-------------|
| C | -5.75050000 | 2.09571200 | -0.75378600 |
| H | -6.27299900 | 2.73196100 | -2.73431800 |
| H | -5.06244000 | 1.36130600 | 1.14904400  |
| N | -6.96892400 | 2.68877800 | -0.17023500 |
| O | -7.12259000 | 2.59205000 | 1.04524700  |
| O | -7.75375800 | 3.24621700 | -0.93677900 |
| P | 2.82956100  | 1.21295400 | 0.50256200  |
| C | -0.44796400 | 4.06820600 | 2.47626800  |
| C | 1.02681100  | 4.27081600 | 2.85485300  |
| C | 1.97912000  | 3.66374300 | 1.80682300  |
| C | 1.65296000  | 2.17070200 | 1.59402300  |
| C | 0.18625500  | 2.00451800 | 1.14461300  |
| C | -0.76325700 | 2.58994500 | 2.20170100  |
| H | -0.67321700 | 4.65532100 | 1.57417100  |
| H | -1.09719700 | 4.45540300 | 3.27080500  |
| H | 1.22284600  | 3.79991500 | 3.82914900  |
| H | 1.85988900  | 4.20517100 | 0.85901300  |
| H | 1.76471600  | 1.65221600 | 2.55666700  |
| H | 0.02326800  | 2.52673400 | 0.19423700  |
| H | -0.03579600 | 0.95047400 | 0.95153800  |
| H | -0.66959100 | 2.01664400 | 3.13627400  |
| H | -1.80179800 | 2.48076600 | 1.86676800  |
| H | 1.24661300  | 5.33886300 | 2.97498900  |
| H | 3.01827000  | 3.80499900 | 2.12721800  |
| C | 3.47418300  | 2.62262600 | -4.00133300 |
| C | 3.24820700  | 3.68739900 | -2.92007800 |
| C | 3.51930200  | 3.12602300 | -1.51309800 |
| C | 2.64951300  | 1.87551600 | -1.24503400 |
| C | 2.85708700  | 0.79537200 | -2.32776700 |
| C | 2.62047700  | 1.37690500 | -3.73132100 |

|    |             |             |             |
|----|-------------|-------------|-------------|
| H  | 4.53855200  | 2.34392200  | -4.01816900 |
| H  | 3.24315000  | 3.03511400  | -4.99112000 |
| H  | 2.21105400  | 4.04769300  | -2.97261500 |
| H  | 4.58192800  | 2.86031800  | -1.43984900 |
| H  | 1.59344200  | 2.17277500  | -1.29701900 |
| H  | 3.86820000  | 0.37394500  | -2.25711900 |
| H  | 2.14937300  | -0.01567700 | -2.15284300 |
| H  | 1.55656600  | 1.63318600  | -3.82898300 |
| H  | 2.82586600  | 0.60324300  | -4.48159700 |
| H  | 3.89334700  | 4.55803200  | -3.09311200 |
| H  | 3.33609300  | 3.90351300  | -0.76276100 |
| C  | 7.11361100  | 0.57572300  | 2.36914400  |
| C  | 6.10260400  | 1.41300600  | 3.16240200  |
| C  | 4.66831300  | 1.22110900  | 2.64183300  |
| C  | 4.56544700  | 1.52587800  | 1.12857500  |
| C  | 5.59765800  | 0.69324000  | 0.33244400  |
| C  | 7.02426400  | 0.88955200  | 0.87049900  |
| H  | 6.90680400  | -0.49191600 | 2.52981500  |
| H  | 8.13067400  | 0.75897500  | 2.73694400  |
| H  | 6.37607600  | 2.47640500  | 3.09306800  |
| H  | 4.34418100  | 0.18641400  | 2.81345000  |
| H  | 4.76442600  | 2.59430400  | 0.96594200  |
| H  | 5.31102500  | -0.36393300 | 0.39660700  |
| H  | 5.56694400  | 0.95957300  | -0.73033800 |
| H  | 7.34183300  | 1.92832800  | 0.69585400  |
| H  | 7.71450000  | 0.25341600  | 0.30281600  |
| H  | 6.13755400  | 1.15119500  | 4.22708100  |
| H  | 3.98744400  | 1.86414100  | 3.21165400  |
| H  | -1.84756800 | -1.80971300 | -2.60630200 |
| Se | 2.43875500  | -0.91862000 | 0.75827400  |

S8

0 imaginary frequency

H = -8315.709482

G = -8315.851729

Esol = -8316.651243

|   |             |             |             |
|---|-------------|-------------|-------------|
| N | -2.85392200 | 0.53745600  | 1.61545100  |
| N | 0.04759800  | 1.55731800  | 0.02306600  |
| S | -3.67485200 | -0.93415100 | 1.44407300  |
| O | -4.57218900 | -1.18169700 | 2.58064400  |
| O | -2.67888300 | -1.97082300 | 1.10381600  |
| S | 0.90072400  | 2.23618600  | 1.29548600  |
| O | 1.79571300  | 1.20843000  | 1.86232400  |
| O | 0.02506900  | 2.97871400  | 2.21412800  |
| C | -1.33872800 | 0.83575600  | 4.78781900  |
| C | -2.43327200 | 0.51780900  | 4.09389900  |
| C | -2.91342700 | 1.31131700  | 2.90391100  |
| H | -3.06300400 | -0.31272400 | 4.40706900  |
| H | -2.18933600 | 2.10911700  | 2.71487200  |
| H | -0.71908700 | 2.22654600  | -0.43033600 |
| H | -1.04974400 | 0.27685900  | 5.67502300  |
| H | -0.69715400 | 1.66368300  | 4.49564500  |
| C | -4.29285000 | 1.94959100  | 3.13979400  |
| H | -4.23171400 | 2.64487200  | 3.98425200  |
| H | -4.59810200 | 2.50795500  | 2.24885200  |
| H | -5.04867000 | 1.19348300  | 3.36860100  |
| C | 1.92579600  | 3.45345500  | 0.44450200  |
| C | 3.27107300  | 3.53178500  | 0.81190900  |
| C | 1.36044600  | 4.33402700  | -0.48391800 |

|   |             |             |             |
|---|-------------|-------------|-------------|
| C | 4.08201100  | 4.50414100  | 0.23171700  |
| H | 3.67131600  | 2.83896400  | 1.54345700  |
| C | 2.17490000  | 5.30119800  | -1.06892400 |
| H | 0.31049500  | 4.25955100  | -0.76064400 |
| C | 3.51823200  | 5.36962800  | -0.70285500 |
| H | 5.12895400  | 4.60171700  | 0.49065000  |
| H | 1.78280800  | 5.99754500  | -1.79977600 |
| C | -4.67898500 | -0.68565900 | -0.03559500 |
| C | -4.05763800 | -0.46367500 | -1.26810100 |
| C | -6.06519800 | -0.77421200 | 0.08747100  |
| C | -4.84659200 | -0.32370000 | -2.40423200 |
| H | -2.97784000 | -0.38302700 | -1.32943000 |
| C | -6.85705300 | -0.64001000 | -1.05093900 |
| H | -6.50925900 | -0.94982900 | 1.06087800  |
| C | -6.23162500 | -0.41863000 | -2.27526300 |
| H | -4.40946700 | -0.14255300 | -3.37791300 |
| H | -7.93681000 | -0.70468600 | -1.00346900 |
| N | 4.37743900  | 6.39206600  | -1.32765700 |
| N | -7.06682700 | -0.28185300 | -3.48305500 |
| O | 3.85887400  | 7.15361100  | -2.14176100 |
| O | -8.28690400 | -0.35454200 | -3.34427100 |
| O | 5.56307100  | 6.41876000  | -0.99799700 |
| O | -6.49246900 | -0.10683700 | -4.55671100 |
| O | -1.54430100 | 3.27086300  | -1.03346000 |
| C | -2.79696900 | 3.33999200  | -0.79017300 |
| O | -3.48064400 | 2.48708800  | -0.17277700 |
| C | -3.49970400 | 4.59202000  | -1.30681000 |
| H | -3.16952100 | 5.45875800  | -0.72173700 |
| H | -3.22029300 | 4.77938100  | -2.34846900 |
| H | -4.58372300 | 4.49574300  | -1.21949500 |

|    |             |             |             |
|----|-------------|-------------|-------------|
| H  | -3.07129800 | 1.20118000  | 0.82332600  |
| Se | -0.58117700 | -0.16677700 | 0.21431100  |
| Se | 0.76364000  | -1.29338900 | -1.46111100 |
| P  | 2.28039300  | -2.42633300 | -0.24661000 |
| C  | 5.66893600  | 0.19034700  | -2.19703500 |
| C  | 5.64087800  | -1.30368300 | -2.54067800 |
| C  | 4.29572300  | -1.95123900 | -2.17003800 |
| C  | 3.94937400  | -1.72306300 | -0.67975200 |
| C  | 3.98458300  | -0.21554700 | -0.33549600 |
| C  | 5.33229800  | 0.41646500  | -0.71830200 |
| H  | 4.93667400  | 0.72139800  | -2.82156400 |
| H  | 6.65164600  | 0.61486800  | -2.43435200 |
| H  | 6.44940200  | -1.81908700 | -2.00181000 |
| H  | 3.49629500  | -1.51612300 | -2.78603700 |
| H  | 4.67483000  | -2.26133900 | -0.05260000 |
| H  | 3.17024400  | 0.27686600  | -0.88186800 |
| H  | 3.77950600  | -0.04988900 | 0.72602300  |
| H  | 6.12895600  | -0.00988200 | -0.09092200 |
| H  | 5.29679000  | 1.48883600  | -0.49413400 |
| H  | 5.83030300  | -1.45849900 | -3.60973100 |
| H  | 4.33278400  | -3.02091100 | -2.40192800 |
| C  | 2.76043900  | -6.86175000 | -1.90066900 |
| C  | 1.51954200  | -6.05503100 | -2.30886900 |
| C  | 1.73062500  | -4.54411000 | -2.11589800 |
| C  | 2.14452500  | -4.24194500 | -0.65808400 |
| C  | 3.40209400  | -5.03990200 | -0.24200600 |
| C  | 3.17953600  | -6.54809600 | -0.45766000 |
| H  | 3.59095700  | -6.62192200 | -2.58078700 |
| H  | 2.56755000  | -7.93546800 | -2.01079600 |
| H  | 0.65803000  | -6.37845700 | -1.70725700 |

|   |             |             |             |
|---|-------------|-------------|-------------|
| H | 2.50622800  | -4.19631300 | -2.80973700 |
| H | 1.31195100  | -4.56229500 | -0.01735400 |
| H | 4.26247500  | -4.71472100 | -0.84169300 |
| H | 3.65632700  | -4.84945000 | 0.80733400  |
| H | 2.40059300  | -6.89861200 | 0.23429300  |
| H | 4.09659800  | -7.08984200 | -0.19644500 |
| H | 1.26035800  | -6.25343000 | -3.35558300 |
| H | 0.81421600  | -3.99651200 | -2.35867500 |
| C | 1.27403900  | -2.53648900 | 4.39507800  |
| C | 0.15731100  | -2.41564400 | 3.34782300  |
| C | 0.61669200  | -2.92845200 | 1.97558900  |
| C | 1.88263900  | -2.15346300 | 1.54131700  |
| C | 3.03067700  | -2.38473700 | 2.54648200  |
| C | 2.57930300  | -1.87177600 | 3.92908800  |
| H | 1.46407400  | -3.60106000 | 4.60014200  |
| H | 0.95058100  | -2.09043200 | 5.34323700  |
| H | -0.16281800 | -1.37350700 | 3.23182700  |
| H | 0.84362100  | -4.00223700 | 2.03982800  |
| H | 1.63596500  | -1.08425100 | 1.56230900  |
| H | 3.27576300  | -3.45434200 | 2.60780200  |
| H | 3.94306600  | -1.85986800 | 2.24143600  |
| H | 2.43464100  | -0.78567200 | 3.86254400  |
| H | 3.37916100  | -2.04649200 | 4.65950300  |
| H | -0.72890500 | -2.97776900 | 3.66352900  |
| H | -0.19650300 | -2.81178300 | 1.25283000  |

S9

0 imaginary frequency

H = -8315.708372

G = -8315.851205

Esol = -8316.651793

|   |             |             |             |
|---|-------------|-------------|-------------|
| N | -2.45305500 | 0.93896400  | 1.75296700  |
| N | 0.27954000  | 1.95963100  | 0.15526600  |
| S | -3.40302800 | -0.45634100 | 1.65081000  |
| O | -4.32779800 | -0.58149300 | 2.78615500  |
| O | -2.50894500 | -1.59489900 | 1.36424900  |
| S | 1.37205400  | 2.48002600  | 1.28672200  |
| O | 2.17248200  | 1.38093900  | 1.86961900  |
| O | 0.73129200  | 3.43064100  | 2.21872500  |
| C | -0.39648900 | 0.71878000  | 4.63433400  |
| C | -1.60719500 | 0.59667000  | 4.08855600  |
| C | -2.15257600 | 1.57582600  | 3.07970200  |
| H | -2.28732600 | -0.18575300 | 4.42254300  |
| H | -1.35679700 | 2.28285600  | 2.82464800  |
| H | -0.77524000 | 3.03992000  | -0.52187100 |
| H | -0.05843300 | 0.04108800  | 5.41446500  |
| H | 0.29539300  | 1.49775700  | 4.32377800  |
| C | -3.35442800 | 2.36255000  | 3.62960000  |
| H | -3.72834900 | 3.05993700  | 2.87172000  |
| H | -4.16679100 | 1.69423300  | 3.92711300  |
| H | -3.03882000 | 2.94122700  | 4.50408700  |
| C | 2.49307100  | 3.45866200  | 0.26294600  |
| C | 3.81599600  | 3.03883900  | 0.11951700  |
| C | 2.03190300  | 4.63017300  | -0.34648200 |
| C | 4.69690800  | 3.79380700  | -0.65146700 |
| H | 4.14282400  | 2.13256300  | 0.61607300  |
| C | 2.90513800  | 5.38468000  | -1.12296500 |
| H | 1.00022500  | 4.94112600  | -0.22647600 |
| C | 4.22466300  | 4.95322400  | -1.26195500 |



|    |             |             |             |
|----|-------------|-------------|-------------|
| H  | 5.73144100  | 3.50252400  | -0.78382500 |
| H  | 2.58479800  | 6.29407200  | -1.61579000 |
| C  | -4.37347300 | -0.13758800 | 0.15971200  |
| C  | -3.74139000 | 0.03141600  | -1.07707700 |
| C  | -5.76300000 | -0.13066000 | 0.28558200  |
| C  | -4.52472000 | 0.21853300  | -2.21184500 |
| H  | -2.65714900 | 0.04437900  | -1.14615700 |
| C  | -6.54752400 | 0.04916800  | -0.85172000 |
| H  | -6.21508300 | -0.26580500 | 1.26178200  |
| C  | -5.91241300 | 0.21942100  | -2.07898400 |
| H  | -4.07940700 | 0.36139200  | -3.18844600 |
| H  | -7.62904900 | 0.05962700  | -0.80034700 |
| N  | 5.15116000  | 5.75069100  | -2.08258200 |
| N  | -6.74042400 | 0.40905600  | -3.28595500 |
| O  | 6.30817600  | 5.34563600  | -2.19647200 |
| O  | -6.15715200 | 0.55178300  | -4.35925200 |
| O  | 4.71431100  | 6.77426800  | -2.60779300 |
| O  | -7.96178000 | 0.41083800  | -3.14394200 |
| O  | -1.25092000 | 3.83746900  | -0.95631700 |
| C  | -2.52606100 | 3.93427100  | -0.62332200 |
| O  | -3.13913100 | 3.12490900  | 0.06823900  |
| C  | -3.18040600 | 5.17232900  | -1.19218600 |
| H  | -4.24820800 | 5.16570900  | -0.97150700 |
| H  | -2.71942100 | 6.06425100  | -0.75386000 |
| H  | -3.01751200 | 5.22094900  | -2.27343100 |
| H  | -2.75699900 | 1.65744600  | 1.07352300  |
| Se | -0.25689900 | 0.23891900  | 0.27252500  |
| Se | 1.45741500  | -0.76131800 | -1.28652500 |
| P  | 1.64788600  | -2.73192900 | -0.30174100 |
| C  | 3.33725400  | -1.19477300 | 3.83092600  |

|   |            |             |             |
|---|------------|-------------|-------------|
| C | 4.32607700 | -1.59462000 | 2.72781800  |
| C | 3.64271500 | -1.67014300 | 1.35255800  |
| C | 2.42244100 | -2.61953200 | 1.39060400  |
| C | 1.42191500 | -2.21056900 | 2.49850700  |
| C | 2.13435500 | -2.14646100 | 3.85968500  |
| H | 2.98507700 | -0.17410700 | 3.64228300  |
| H | 3.84186400 | -1.19418300 | 4.80530400  |
| H | 4.77435700 | -2.57112800 | 2.96744000  |
| H | 3.29609900 | -0.67804300 | 1.04529700  |
| H | 2.77054300 | -3.64160100 | 1.60094500  |
| H | 0.97919400 | -1.24032800 | 2.25625700  |
| H | 0.59620100 | -2.92894800 | 2.55374000  |
| H | 2.46746000 | -3.15655700 | 4.14514900  |
| H | 1.41172500 | -1.82808100 | 4.61956500  |
| H | 5.15291000 | -0.87568400 | 2.67620200  |
| H | 4.36543100 | -2.00934300 | 0.59838400  |
| C | 5.09469600 | -5.14056200 | -2.56922300 |
| C | 4.38111500 | -3.99597400 | -3.30174600 |
| C | 3.67051800 | -3.04373300 | -2.32560000 |
| C | 2.68809200 | -3.82272700 | -1.42214400 |
| C | 3.42337400 | -4.95046900 | -0.66163800 |
| C | 4.12863700 | -5.89821600 | -1.64837500 |
| H | 5.91984600 | -4.72991400 | -1.96940000 |
| H | 5.54704800 | -5.83017500 | -3.29193500 |
| H | 3.64123400 | -4.41351100 | -4.00013800 |
| H | 4.41609900 | -2.53212800 | -1.70293300 |
| H | 1.93670300 | -4.28758100 | -2.07607700 |
| H | 4.17446300 | -4.50954600 | 0.00669400  |
| H | 2.73098900 | -5.51999200 | -0.03147700 |
| H | 3.37206400 | -6.41630600 | -2.25529000 |

|   |             |             |             |
|---|-------------|-------------|-------------|
| H | 4.66226200  | -6.67381500 | -1.08573200 |
| H | 5.09434000  | -3.42566800 | -3.90869900 |
| H | 3.13776800  | -2.26488400 | -2.88089400 |
| C | -2.33247200 | -5.28049500 | -0.73560500 |
| C | -2.24742400 | -3.89622700 | -1.39502900 |
| C | -0.79028900 | -3.43134900 | -1.55245100 |
| C | -0.06654400 | -3.44877000 | -0.18646900 |
| C | -0.12252400 | -4.85491200 | 0.44741600  |
| C | -1.58703000 | -5.30441600 | 0.60642600  |
| H | -1.89666000 | -6.03493400 | -1.40803100 |
| H | -3.38138000 | -5.56374600 | -0.58669600 |
| H | -2.78897900 | -3.16689900 | -0.78055000 |
| H | -0.27408400 | -4.10183800 | -2.25561600 |
| H | -0.58963800 | -2.74077500 | 0.47076800  |
| H | 0.40433100  | -5.57094100 | -0.19929800 |
| H | 0.38021300  | -4.87182100 | 1.42130500  |
| H | -2.08923500 | -4.63339100 | 1.31564100  |
| H | -1.61252800 | -6.31069700 | 1.04251200  |
| H | -2.73039100 | -3.91189100 | -2.37991500 |
| H | -0.73793500 | -2.42557200 | -1.98041900 |

SeIMe

0 imaginary frequency

H = -2706.398413

G = -2706.442378

Esol = -2706.537723

|    |             |             |             |
|----|-------------|-------------|-------------|
| Se | 1.66749200  | -0.00002300 | -0.00000100 |
| C  | -0.14857800 | 0.00000600  | -0.00000900 |
| C  | -2.30720700 | -0.67810400 | -0.00000200 |

|   |             |             |             |
|---|-------------|-------------|-------------|
| C | -2.30718100 | 0.67815700  | 0.00000200  |
| H | -3.12392500 | -1.38270200 | -0.00003000 |
| H | -3.12387900 | 1.38277300  | 0.00000600  |
| N | -0.98132600 | -1.08865800 | -0.00002400 |
| N | -0.98128900 | 1.08868600  | 0.00001400  |
| C | -0.49417700 | -2.45722400 | 0.00001800  |
| H | 0.12486900  | -2.63129200 | -0.88463200 |
| H | 0.12498000  | -2.63119000 | 0.88460800  |
| H | -1.35060100 | -3.13479600 | 0.00010000  |
| C | -0.49409000 | 2.45724300  | 0.00000200  |
| H | 0.12481600  | 2.63134000  | 0.88474400  |
| H | 0.12521800  | 2.63114800  | -0.88449300 |
| H | -1.35049400 | 3.13484100  | -0.00025700 |

SeOIMe

0 imaginary frequency

H = -2781.606683

G = -2781.653450

Esol = -2781.751429

|    |             |             |             |
|----|-------------|-------------|-------------|
| Se | -1.97797600 | 0.00014000  | -0.28352400 |
| C  | 0.59836400  | 0.00002400  | 0.47644700  |
| C  | 2.47599900  | 0.67892100  | -0.52713700 |
| C  | 2.47577300  | -0.67965700 | -0.52701000 |
| H  | 3.19768900  | 1.38269600  | -0.91038400 |
| H  | 3.19708600  | -1.38376700 | -0.91034500 |
| N  | 1.31044300  | 1.09388300  | 0.10304000  |
| N  | 1.31007900  | -1.09414000 | 0.10323700  |
| C  | 0.78428400  | 2.44871300  | 0.24156200  |
| H  | 1.31483300  | 3.10246300  | -0.45280400 |

|   |             |             |             |
|---|-------------|-------------|-------------|
| H | -0.28054800 | 2.41804000  | -0.00939100 |
| H | 0.91634000  | 2.81243500  | 1.26437300  |
| C | 0.78331800  | -2.44875400 | 0.24167200  |
| H | 1.31381300  | -3.10275200 | -0.45250100 |
| H | 0.91495100  | -2.81245100 | 1.26454700  |
| H | -0.28145400 | -2.41763700 | -0.00954800 |
| O | -0.51144900 | 0.00031700  | 1.12234100  |

### SeOPCy3

0 imaginary frequency

H = -3523.822042

G = -3523.893481

Esol = -3524.337421

|    |             |             |             |
|----|-------------|-------------|-------------|
| Se | -0.00290800 | -2.11594500 | -2.20385500 |
| O  | -0.00049800 | -0.17114100 | -1.71518800 |
| P  | -0.00012800 | 0.02637200  | -0.15714900 |
| C  | 0.00662300  | 4.68375500  | -0.92727000 |
| C  | 1.26674000  | 4.04591600  | -0.33085800 |
| C  | 1.27402600  | 2.51798200  | -0.50519300 |
| C  | 0.00255400  | 1.86570300  | 0.09167900  |
| C  | -1.26730500 | 2.52194600  | -0.50433900 |
| C  | -1.25512300 | 4.04986500  | -0.33008800 |
| H  | 0.00606200  | 4.53915200  | -2.01714900 |
| H  | 0.00837800  | 5.76691300  | -0.75328900 |
| H  | 1.32544100  | 4.28919200  | 0.74061500  |
| H  | 1.33206900  | 2.26665600  | -1.57158800 |
| H  | 0.00316400  | 2.02489800  | 1.18069700  |
| H  | -1.32692000 | 2.27074700  | -1.57068000 |
| H  | -2.16702200 | 2.11502000  | -0.03307900 |

|   |             |             |             |
|---|-------------|-------------|-------------|
| H | -1.31241700 | 4.29336600  | 0.74141100  |
| H | -2.15485400 | 4.47271100  | -0.79398300 |
| H | 2.16750700  | 4.46596400  | -0.79528500 |
| H | 2.17280900  | 2.10815200  | -0.03464600 |
| C | 4.26036900  | -1.02859100 | 1.69473700  |
| C | 3.87669100  | -1.56478900 | 0.30843700  |
| C | 2.72713000  | -0.76304600 | -0.32177400 |
| C | 1.50293100  | -0.74863800 | 0.62679600  |
| C | 1.87854700  | -0.18260800 | 2.01549600  |
| C | 3.04322700  | -0.98135700 | 2.62873700  |
| H | 4.67560700  | -0.01494700 | 1.59058700  |
| H | 5.05146300  | -1.64508100 | 2.13985200  |
| H | 3.57407700  | -2.61862100 | 0.39193000  |
| H | 3.06929600  | 0.26013500  | -0.51992600 |
| H | 1.19155000  | -1.79530200 | 0.74449500  |
| H | 2.17775800  | 0.87034500  | 1.92111200  |
| H | 1.02529800  | -0.20585800 | 2.70258300  |
| H | 2.70232200  | -2.00635700 | 2.83439500  |
| H | 3.31701100  | -0.54256400 | 3.59665500  |
| H | 4.74465200  | -1.54381300 | -0.36213600 |
| H | 2.43311700  | -1.20720400 | -1.27748000 |
| C | -4.26310800 | -1.01876900 | 1.69479700  |
| C | -3.04570300 | -0.97554500 | 2.62864800  |
| C | -1.87888300 | -0.17946100 | 2.01601800  |
| C | -1.50508000 | -0.74503000 | 0.62669300  |
| C | -2.72952300 | -0.75534300 | -0.32170400 |
| C | -3.88101800 | -1.55476100 | 0.30799300  |
| H | -4.67571900 | -0.00396000 | 1.59155300  |
| H | -5.05573400 | -1.63354800 | 2.13955800  |
| H | -2.70753100 | -2.00163000 | 2.83337000  |

|   |             |             |             |
|---|-------------|-------------|-------------|
| H | -2.17500900 | 0.87448300  | 1.92292900  |
| H | -1.19651500 | -1.79267200 | 0.74317800  |
| H | -3.06911400 | 0.26887900  | -0.51883900 |
| H | -2.43684800 | -1.19944100 | -1.27783100 |
| H | -3.58096700 | -2.60939800 | 0.39052000  |
| H | -3.31814300 | -0.53681700 | 3.59697400  |
| H | -1.02559400 | -0.20605900 | 2.70294500  |
| H | -4.74899800 | -1.53102600 | -0.36245600 |

SePCy3

0 imaginary frequency

H = -3448.610711

G = -3448.679743

Esol = -3449.120988

|   |             |             |             |
|---|-------------|-------------|-------------|
| P | -0.00003600 | -0.11223500 | 0.39286100  |
| C | 0.00086300  | 4.37539700  | -1.03695800 |
| C | -1.25999700 | 3.54546300  | -1.30549600 |
| C | -1.26779700 | 2.24146900  | -0.49097700 |
| C | 0.00021800  | 1.39074900  | -0.73468300 |
| C | 1.26862800  | 2.24090400  | -0.49109100 |
| C | 1.26133500  | 3.54490600  | -1.30560400 |
| H | 0.00098100  | 4.70628400  | 0.01141800  |
| H | 0.00103300  | 5.28211200  | -1.65516900 |
| H | -1.31673100 | 3.30821900  | -2.37864100 |
| H | -1.32233400 | 2.46529500  | 0.58247200  |
| H | 0.00010100  | 1.02169800  | -1.77046100 |
| H | 1.32335200  | 2.46469900  | 0.58235500  |
| H | 2.16888200  | 1.66682700  | -0.73707600 |
| H | 1.31787900  | 3.30765000  | -2.37875700 |

|   |             |             |             |
|---|-------------|-------------|-------------|
| H | 2.16184200  | 4.12524000  | -1.06751700 |
| H | -2.16022700 | 4.12620100  | -1.06734400 |
| H | -2.16832600 | 1.66779300  | -0.73688400 |
| C | -4.21573800 | -2.02015500 | -0.90265300 |
| C | -3.83042400 | -1.93913800 | 0.58151800  |
| C | -2.72693100 | -0.89835400 | 0.82643800  |
| C | -1.48588400 | -1.20101000 | -0.03995800 |
| C | -1.86875500 | -1.25376800 | -1.53553700 |
| C | -2.98565700 | -2.28584300 | -1.78119800 |
| H | -4.67953300 | -1.07047100 | -1.20803000 |
| H | -4.96973600 | -2.80129200 | -1.06244600 |
| H | -3.48159900 | -2.92555000 | 0.92197200  |
| H | -3.11270000 | 0.10033900  | 0.58211900  |
| H | -1.12958800 | -2.20167800 | 0.24990700  |
| H | -2.21813500 | -0.26515300 | -1.86155000 |
| H | -1.00525700 | -1.50230200 | -2.16140100 |
| H | -2.59622800 | -3.29200300 | -1.56681000 |
| H | -3.26346500 | -2.27906400 | -2.84303600 |
| H | -4.70939900 | -1.69336900 | 1.19060500  |
| H | -2.43802400 | -0.86467500 | 1.88089800  |
| C | 4.21518800  | -2.02122300 | -0.90254400 |
| C | 2.98495900  | -2.28696000 | -1.78085700 |
| C | 1.86825400  | -1.25464600 | -1.53537200 |
| C | 1.48553300  | -1.20138900 | -0.03975600 |
| C | 2.72674800  | -0.89876800 | 0.82644300  |
| C | 3.83004500  | -1.93978300 | 0.58164600  |
| H | 4.67907900  | -1.07167700 | -1.20821100 |
| H | 4.96905500  | -2.80250500 | -1.06223000 |
| H | 2.59539700  | -3.29299900 | -1.56612900 |
| H | 2.21772800  | -0.26616900 | -1.86169600 |



|    |             |             |             |
|----|-------------|-------------|-------------|
| H  | 1.12907200  | -2.20191500 | 0.25040500  |
| H  | 3.11265000  | 0.09980800  | 0.58188100  |
| H  | 2.43795300  | -0.86482700 | 1.88092500  |
| H  | 3.48110200  | -2.92605700 | 0.92237500  |
| H  | 4.70911700  | -1.69399600 | 1.19058700  |
| H  | 3.26263500  | -2.28054700 | -2.84273400 |
| H  | 1.00463200  | -1.50323000 | -2.16104700 |
| Se | -0.00012300 | 0.47981500  | 2.43753400  |

SeSeIMe

0 imaginary frequency

H = -5107.953308

G = -5108.001396

Esol = -5108.095893

|    |             |             |             |
|----|-------------|-------------|-------------|
| Se | -2.07646800 | 0.26602800  | -0.69314000 |
| C  | 1.00462400  | -0.03807500 | 0.25565600  |
| C  | 2.55571500  | 1.47006300  | -0.30428000 |
| C  | 3.02652300  | 0.24521100  | -0.66425100 |
| H  | 2.99174900  | 2.45114800  | -0.40844000 |
| H  | 3.95325700  | -0.04491000 | -1.13381700 |
| N  | 1.31605000  | 1.28043900  | 0.27472000  |
| N  | 2.05678000  | -0.67944700 | -0.31739600 |
| C  | 0.41521700  | 2.31491400  | 0.77875200  |
| H  | 0.92074900  | 3.27912700  | 0.71048000  |
| H  | -0.50889800 | 2.29130500  | 0.18321100  |
| H  | 0.16061700  | 2.08958400  | 1.81726800  |
| C  | 2.10469400  | -2.11470800 | -0.57477600 |
| H  | 2.61543400  | -2.29161400 | -1.52375500 |
| H  | 2.63074100  | -2.63722900 | 0.22985900  |

|    |             |             |             |
|----|-------------|-------------|-------------|
| H  | 1.07323800  | -2.47104600 | -0.62631600 |
| Se | -0.63198300 | -0.79949100 | 0.81383500  |

SeSePCy3

0 imaginary frequency

H = -5850.160879

G = -5850.234808

Esol = -5850.674607

|    |             |             |             |
|----|-------------|-------------|-------------|
| Se | -2.84754500 | -0.62439500 | -1.24232600 |
| Se | -0.63000600 | -0.47236400 | -1.96637300 |
| P  | 0.40534100  | 0.12305000  | -0.08001500 |
| C  | -1.63117300 | -3.17026300 | 2.70747600  |
| C  | -1.48275500 | -1.75137100 | 3.26870100  |
| C  | -1.24694800 | -0.71112000 | 2.15926200  |
| C  | -0.01136200 | -1.08553900 | 1.30508900  |
| C  | -0.19850500 | -2.51227700 | 0.72017800  |
| C  | -0.41954600 | -3.53822000 | 1.84300300  |
| H  | -2.54017800 | -3.22397100 | 2.09340900  |
| H  | -1.75275900 | -3.89261000 | 3.52465100  |
| H  | -0.64099500 | -1.72624800 | 3.97841100  |
| H  | -2.11539800 | -0.65663200 | 1.49332400  |
| H  | 0.88173800  | -1.07588000 | 1.95015900  |
| H  | -1.06982300 | -2.49451300 | 0.05564800  |
| H  | 0.66232900  | -2.80707700 | 0.11425500  |
| H  | 0.47944900  | -3.59898200 | 2.47599800  |
| H  | -0.55462300 | -4.53110200 | 1.39626700  |
| H  | -2.37711300 | -1.46745400 | 3.83737500  |
| H  | -1.12097800 | 0.26975100  | 2.62190400  |
| C  | -1.03218300 | 4.56767700  | 1.09223400  |

|   |             |             |             |
|---|-------------|-------------|-------------|
| C | -1.16131800 | 4.05841100  | -0.35037800 |
| C | -1.14585000 | 2.52395800  | -0.43760400 |
| C | 0.11431600  | 1.96137700  | 0.25902600  |
| C | 0.18643500  | 2.43815300  | 1.72653700  |
| C | 0.20518700  | 3.97650200  | 1.78230300  |
| H | -1.92931300 | 4.28137100  | 1.65995700  |
| H | -0.98782200 | 5.66383900  | 1.10799100  |
| H | -0.33140900 | 4.46302100  | -0.94981400 |
| H | -2.04599700 | 2.09350300  | 0.01427500  |
| H | 0.98405800  | 2.39108500  | -0.26419200 |
| H | -0.69965000 | 2.08968300  | 2.26543100  |
| H | 1.05959400  | 2.02807300  | 2.24751700  |
| H | 1.11679900  | 4.35120400  | 1.29339100  |
| H | 0.25471300  | 4.30212100  | 2.82900000  |
| H | -2.08483500 | 4.43505300  | -0.80631800 |
| H | -1.16033800 | 2.20030300  | -1.48167400 |
| C | 5.10045600  | -0.78674100 | -0.31322400 |
| C | 4.62606400  | 0.54893200  | 0.27576200  |
| C | 3.15051300  | 0.49855500  | 0.71594300  |
| C | 2.24516400  | 0.03786800  | -0.44723200 |
| C | 2.71665700  | -1.32622500 | -0.99611300 |
| C | 4.18237400  | -1.25013700 | -1.45311600 |
| H | 5.10730100  | -1.55056900 | 0.47821400  |
| H | 6.13445300  | -0.69561500 | -0.66773100 |
| H | 4.74505100  | 1.34137300  | -0.47733100 |
| H | 3.04767200  | -0.19889300 | 1.55919300  |
| H | 2.34323300  | 0.77052700  | -1.26324100 |
| H | 2.63384500  | -2.08553300 | -0.20780100 |
| H | 2.06643200  | -1.64658900 | -1.81660300 |
| H | 4.26437200  | -0.55268100 | -2.29938200 |

|   |            |             |             |
|---|------------|-------------|-------------|
| H | 4.50066000 | -2.23139900 | -1.82549100 |
| H | 5.25107300 | 0.83535900  | 1.13069900  |
| H | 2.84992700 | 1.48629700  | 1.08142300  |

TS-S1

1 imaginary frequency

H = -4645.325767

G = -4645.429023

Esol = -4646.067463

|    |            |             |             |
|----|------------|-------------|-------------|
| Se | 2.07900800 | 0.18305100  | 0.52587100  |
| N  | 2.61685300 | -0.98419300 | -0.75828100 |
| S  | 2.68652100 | -2.60837500 | -0.26228500 |
| O  | 3.31278600 | -2.76579500 | 1.06608900  |
| O  | 3.22419500 | -3.34746000 | -1.40978500 |
| C  | 3.92565400 | 0.34787100  | 1.61489900  |
| C  | 4.67886500 | 0.77992200  | 0.48032300  |
| C  | 5.18761200 | -0.13266500 | -0.47983700 |
| H  | 4.64228000 | 1.84001600  | 0.22978600  |
| H  | 5.54095100 | -1.07672800 | -0.05068700 |
| H  | 4.06751700 | -0.55889100 | -0.88957800 |
| H  | 3.67755200 | 1.10088300  | 2.36150900  |
| H  | 4.11077500 | -0.64685600 | 2.01103800  |
| C  | 6.01167500 | 0.37334900  | -1.65566500 |
| H  | 7.05116400 | 0.56314400  | -1.36291400 |
| H  | 6.02410500 | -0.36520100 | -2.46268000 |
| H  | 5.59775900 | 1.30377600  | -2.06004500 |
| C  | 0.94296300 | -3.02238000 | -0.07990400 |
| C  | 0.21246600 | -3.38330400 | -1.21311800 |
| C  | 0.34329200 | -2.89983400 | 1.17471300  |

|   |             |             |             |
|---|-------------|-------------|-------------|
| C | -1.15706100 | -3.60199100 | -1.09807100 |
| H | 0.71545000  | -3.48639100 | -2.16833000 |
| C | -1.02629800 | -3.11455900 | 1.29491700  |
| H | 0.94537700  | -2.63624600 | 2.03618300  |
| C | -1.75373800 | -3.44518500 | 0.15265400  |
| H | -1.76418600 | -3.87331500 | -1.95254800 |
| H | -1.53545400 | -3.01933500 | 2.24561800  |
| N | -3.21238900 | -3.59849900 | 0.26424100  |
| O | -3.83826000 | -3.88721100 | -0.75586200 |
| O | -3.72719800 | -3.40352100 | 1.36587700  |
| P | -1.07517900 | 1.13707900  | 0.02243800  |
| C | 0.35548400  | 3.10793000  | 4.13736200  |
| C | -0.72826000 | 2.02232300  | 4.15221000  |
| C | -0.78111000 | 1.26319100  | 2.81729100  |
| C | -0.98814300 | 2.20643000  | 1.60561900  |
| C | 0.11015800  | 3.29218100  | 1.60562700  |
| C | 0.16872900  | 4.05224100  | 2.94274300  |
| H | 1.34527200  | 2.63008300  | 4.07182100  |
| H | 0.34616900  | 3.67489600  | 5.07687600  |
| H | -1.70600900 | 2.48873000  | 4.34377600  |
| H | 0.15831500  | 0.70896000  | 2.67188000  |
| H | -1.95523000 | 2.71769200  | 1.72541400  |
| H | 1.08808600  | 2.82557500  | 1.41146500  |
| H | -0.05486700 | 4.01027000  | 0.79533600  |
| H | -0.76615200 | 4.61705900  | 3.07270600  |
| H | 0.97707100  | 4.79459500  | 2.91029600  |
| H | -0.55376900 | 1.31772900  | 4.97564500  |
| H | -1.57063900 | 0.50418000  | 2.85227600  |
| C | -5.53305000 | -0.43224500 | -0.58767600 |
| C | -4.79619000 | 0.16542600  | -1.79338700 |

|   |             |             |             |
|---|-------------|-------------|-------------|
| C | -3.28064300 | 0.26370800  | -1.54576400 |
| C | -2.94952500 | 1.06172200  | -0.26548200 |
| C | -3.69452500 | 0.44673400  | 0.94000800  |
| C | -5.21045600 | 0.35091700  | 0.69148100  |
| H | -5.23656200 | -1.48260800 | -0.45934000 |
| H | -6.61571100 | -0.43531800 | -0.76763300 |
| H | -5.19283700 | 1.17071000  | -2.00103600 |
| H | -2.86242700 | -0.74905000 | -1.45457800 |
| H | -3.31519200 | 2.09172900  | -0.39336800 |
| H | -3.30239400 | -0.56031100 | 1.14205500  |
| H | -3.51909300 | 1.03950100  | 1.84486300  |
| H | -5.62639300 | 1.36659500  | 0.61114100  |
| H | -5.69342600 | -0.11802400 | 1.55796100  |
| H | -4.98339700 | -0.43546300 | -2.69248600 |
| H | -2.79943900 | 0.71815900  | -2.41890100 |
| C | -0.14275600 | 3.51011900  | -4.04388300 |
| C | 0.78095400  | 2.37356600  | -3.58268600 |
| C | 0.10042800  | 1.46562600  | -2.54450700 |
| C | -0.43169700 | 2.28421900  | -1.34519000 |
| C | -1.35313100 | 3.42788300  | -1.80982300 |
| C | -0.65882400 | 4.32587600  | -2.84968400 |
| H | -0.99953600 | 3.08362100  | -4.58676700 |
| H | 0.38062200  | 4.16434300  | -4.75301800 |
| H | 1.69040600  | 2.80566700  | -3.13839400 |
| H | -0.71968500 | 0.91836200  | -3.02877200 |
| H | 0.45827800  | 2.73490900  | -0.88522100 |
| H | -2.26417600 | 3.01072300  | -2.25975500 |
| H | -1.68077400 | 4.03255500  | -0.95395200 |
| H | 0.18679500  | 4.84409500  | -2.37293400 |
| H | -1.35109700 | 5.10713500  | -3.19006100 |

|   |            |            |             |
|---|------------|------------|-------------|
| H | 1.10970000 | 1.77533100 | -4.44215600 |
| H | 0.81121600 | 0.71309100 | -2.18541300 |

TS-S10

1 imaginary frequency

H = -5760.221950

G = -5760.349277

Esol = -5761.094987

|    |             |             |            |
|----|-------------|-------------|------------|
| Se | -0.77800300 | -0.10498100 | 1.46365200 |
| N  | -2.59417100 | -0.05559000 | 2.20483400 |
| N  | -0.11157000 | 1.18978600  | 2.51746900 |
| S  | -3.64300000 | -1.20915300 | 1.64176700 |
| O  | -4.74961100 | -1.37765300 | 2.58357900 |
| O  | -2.79385800 | -2.35717100 | 1.28015800 |
| S  | -0.63433400 | 2.72619800  | 2.20558900 |
| O  | -0.45099000 | 3.53263100  | 3.41886900 |
| O  | -1.97451400 | 2.72884300  | 1.57339800 |
| C  | 0.03124300  | -1.66925800 | 3.46138600 |
| C  | -0.17050900 | -0.69647500 | 4.40486400 |
| C  | 0.62258100  | 0.46862600  | 4.37149700 |
| H  | -1.08572200 | -0.68833700 | 4.99179400 |
| H  | 1.59095700  | 0.38383500  | 3.88608600 |
| H  | -0.64812100 | -2.50958300 | 3.35386100 |
| H  | 0.96459600  | -1.71849800 | 2.90915200 |
| C  | 0.50232500  | 1.53875700  | 5.41059900 |
| H  | 0.90106600  | 2.49343100  | 5.06993300 |
| H  | -0.53394100 | 1.68840100  | 5.72407100 |
| H  | 1.08240800  | 1.21488400  | 6.28847100 |
| C  | 0.51641900  | 3.41247200  | 0.99189200 |

|   |             |             |             |
|---|-------------|-------------|-------------|
| C | 0.37859000  | 4.77081800  | 0.68233000  |
| C | 1.51820600  | 2.63043600  | 0.41819800  |
| C | 1.25874400  | 5.36127900  | -0.21750800 |
| H | -0.40320600 | 5.36079500  | 1.14885500  |
| C | 2.40984200  | 3.22448300  | -0.47463200 |
| H | 1.61383900  | 1.57903700  | 0.66898100  |
| C | 2.26424900  | 4.57439500  | -0.78013400 |
| H | 1.18429900  | 6.40870900  | -0.48195200 |
| H | 3.21004600  | 2.65672600  | -0.93230400 |
| N | 3.20616800  | 5.19259100  | -1.72887100 |
| O | 3.06320300  | 6.38820700  | -1.97916800 |
| O | 4.07976600  | 4.47456900  | -2.21627300 |
| C | -4.37141600 | -0.55244800 | 0.12040900  |
| C | -3.65315200 | 0.33239600  | -0.68827600 |
| C | -5.65260300 | -0.98548200 | -0.23258300 |
| C | -4.22084700 | 0.78651700  | -1.87568300 |
| H | -2.67283100 | 0.68143700  | -0.38480200 |
| C | -6.22063600 | -0.54047600 | -1.42295400 |
| H | -6.20018400 | -1.64878700 | 0.42784200  |
| C | -5.49151600 | 0.33545300  | -2.22521200 |
| H | -3.69966200 | 1.48056800  | -2.52298100 |
| H | -7.21064100 | -0.85234600 | -1.73155700 |
| N | -6.08946200 | 0.80763100  | -3.48818400 |
| O | -7.21777000 | 0.40712500  | -3.76849800 |
| O | -5.42038200 | 1.56939200  | -4.18447600 |
| P | 2.14658900  | -1.73033500 | -0.49861600 |
| C | 0.78852000  | -0.04322100 | -4.74486600 |
| C | -0.03849300 | 0.27835700  | -3.49140900 |
| C | 0.77111200  | 0.05646600  | -2.20469800 |
| C | 1.33954000  | -1.37837200 | -2.14970300 |



|   |             |             |             |
|---|-------------|-------------|-------------|
| C | 2.18671100  | -1.69372500 | -3.40264400 |
| C | 1.36691000  | -1.46458200 | -4.68512600 |
| H | 1.61328600  | 0.67954800  | -4.82903500 |
| H | 0.17554900  | 0.07701000  | -5.64637800 |
| H | -0.93321300 | -0.36164800 | -3.47133500 |
| H | 1.59186900  | 0.78464100  | -2.16261600 |
| H | 0.47627300  | -2.05901500 | -2.16802500 |
| H | 3.07225800  | -1.04543900 | -3.42717600 |
| H | 2.55368500  | -2.72721000 | -3.37845800 |
| H | 0.54518200  | -2.19475300 | -4.72240100 |
| H | 1.99614200  | -1.65816100 | -5.56278500 |
| H | -0.39629600 | 1.31492700  | -3.52823800 |
| H | 0.15360200  | 0.23464500  | -1.31922100 |
| C | 0.31027100  | -6.11250600 | -0.15064500 |
| C | -0.25829700 | -4.95714800 | 0.68699300  |
| C | 0.11975700  | -3.59943600 | 0.07780700  |
| C | 1.65445500  | -3.46307300 | -0.04806000 |
| C | 2.21279700  | -4.59759200 | -0.93358700 |
| C | 1.82709100  | -5.97301200 | -0.35594000 |
| H | -0.18672300 | -6.12189000 | -1.13201600 |
| H | 0.08353500  | -7.07650300 | 0.32131200  |
| H | 0.13291700  | -5.01856800 | 1.71328600  |
| H | -0.33600500 | -3.53549400 | -0.92048800 |
| H | 2.07781000  | -3.57949300 | 0.96142600  |
| H | 1.80206700  | -4.50566700 | -1.94907800 |
| H | 3.30356800  | -4.53142500 | -1.02755100 |
| H | 2.33847000  | -6.10711100 | 0.60857200  |
| H | 2.19692400  | -6.76682000 | -1.01704000 |
| H | -1.34899800 | -5.03003500 | 0.76249600  |
| H | -0.30586500 | -2.77871400 | 0.65929500  |

|   |             |             |             |
|---|-------------|-------------|-------------|
| C | 6.70923000  | -0.77486300 | 0.17336800  |
| C | 6.01527000  | -0.17738400 | -1.05772200 |
| C | 4.48453800  | -0.24490800 | -0.93098700 |
| C | 3.99367300  | -1.69121000 | -0.68466000 |
| C | 4.69425200  | -2.28147900 | 0.56207000  |
| C | 6.22572200  | -2.20672500 | 0.43888500  |
| H | 6.49103600  | -0.14952000 | 1.05130600  |
| H | 7.79807700  | -0.76003200 | 0.04138000  |
| H | 6.32998100  | -0.72634700 | -1.95743700 |
| H | 4.15808300  | 0.37866100  | -0.08870200 |
| H | 4.25306200  | -2.30633500 | -1.55827600 |
| H | 4.36880000  | -1.72007700 | 1.44830700  |
| H | 4.39385300  | -3.32374400 | 0.71988900  |
| H | 6.55303700  | -2.85969900 | -0.38368900 |
| H | 6.68569000  | -2.60320100 | 1.35272900  |
| H | 6.32465500  | 0.86467100  | -1.20454800 |
| H | 4.02134800  | 0.17410000  | -1.83218700 |
| H | -2.96003100 | 0.90223800  | 2.18868600  |
| O | 1.70788700  | -0.75163800 | 0.59285700  |

TS-S11

1 imaginary frequency

H = -5989.384259

G = -5989.522932

Esol = -5990.323786

|    |             |             |             |
|----|-------------|-------------|-------------|
| Se | -0.49550700 | -0.15529300 | -1.21321800 |
| N  | -2.52916800 | -0.84857100 | -1.91787800 |
| N  | -0.16744300 | -1.76922800 | -0.48344500 |
| S  | -3.59483400 | 0.54451100  | -1.90045000 |

|   |             |             |             |
|---|-------------|-------------|-------------|
| O | -4.69638800 | 0.35930900  | -2.84763300 |
| O | -2.72322300 | 1.71972400  | -2.01816800 |
| S | 0.65988700  | -2.96503100 | -1.31125600 |
| O | 0.83356400  | -2.60265000 | -2.72579700 |
| O | 0.05027200  | -4.24330300 | -0.93161300 |
| C | -0.87437700 | -0.41373600 | -4.83670800 |
| C | -2.10939000 | -0.63800200 | -4.38542300 |
| C | -2.40769800 | -1.58611900 | -3.25012200 |
| H | -2.96327600 | -0.13080300 | -4.83080000 |
| H | -1.52405600 | -2.20621800 | -3.08411600 |
| H | -0.86314900 | -2.11825900 | 0.43296100  |
| H | -0.69529800 | 0.26965300  | -5.66328900 |
| H | -0.01046300 | -0.91329600 | -4.40770900 |
| C | -3.60909900 | -2.50376600 | -3.50316300 |
| H | -3.79549400 | -3.14029400 | -2.63255200 |
| H | -4.51384800 | -1.93522900 | -3.72927700 |
| H | -3.37954000 | -3.14803100 | -4.35865200 |
| C | 2.30094100  | -2.93970100 | -0.56397500 |
| C | 3.37334500  | -2.41296600 | -1.28310100 |
| C | 2.46538000  | -3.46152000 | 0.72231000  |
| C | 4.63692700  | -2.38256600 | -0.69733700 |
| H | 3.21140000  | -2.03827100 | -2.28721100 |
| C | 3.72448500  | -3.43044800 | 1.31415600  |
| H | 1.61730300  | -3.88818400 | 1.24756700  |
| C | 4.78674600  | -2.87941300 | 0.59618300  |
| H | 5.49677300  | -1.98572700 | -1.22223300 |
| H | 3.89538600  | -3.82167700 | 2.30940800  |
| C | -4.27985400 | 0.49614800  | -0.23471000 |
| C | -3.43091300 | 0.44221100  | 0.87282100  |
| C | -5.66476400 | 0.60325700  | -0.10661100 |

|   |             |             |             |
|---|-------------|-------------|-------------|
| C | -3.98570800 | 0.49829000  | 2.14649400  |
| H | -2.36363900 | 0.31564900  | 0.72842600  |
| C | -6.21985900 | 0.66992800  | 1.16973200  |
| H | -6.29152600 | 0.62956400  | -0.99062500 |
| C | -5.36861400 | 0.62066600  | 2.27028400  |
| H | -3.36832400 | 0.44383200  | 3.03393400  |
| H | -7.28869700 | 0.75575700  | 1.31994300  |
| N | 6.11399200  | -2.81435200 | 1.23066100  |
| N | -5.95390600 | 0.69811500  | 3.62391000  |
| O | 7.00971700  | -2.22442800 | 0.62369400  |
| O | -5.17920700 | 0.68249900  | 4.57872700  |
| O | 6.24842400  | -3.34248400 | 2.33284600  |
| O | -7.17731700 | 0.77749700  | 3.71060300  |
| O | -1.61687000 | -2.49087300 | 1.41547000  |
| C | -2.77329700 | -2.90852600 | 1.03415000  |
| O | -3.32901800 | -2.62143700 | -0.05231600 |
| C | -3.48836100 | -3.83197300 | 2.00468100  |
| H | -4.54173700 | -3.93579100 | 1.73786300  |
| H | -3.01279700 | -4.81911300 | 1.96780600  |
| H | -3.38707100 | -3.46007900 | 3.02861400  |
| H | -2.81864400 | -1.54264700 | -1.15123400 |
| O | 1.50555500  | 0.70406800  | -0.68716500 |
| P | 1.90372400  | 1.81854300  | 0.30993000  |
| C | 0.10140700  | 5.39251200  | -2.23902200 |
| C | 1.56753800  | 5.48315100  | -1.79903300 |
| C | 2.12826400  | 4.11493400  | -1.37296000 |
| C | 1.27493000  | 3.47888000  | -0.24845300 |
| C | -0.19569400 | 3.37681900  | -0.72398200 |
| C | -0.75745300 | 4.74257600  | -1.14806000 |
| H | 0.03390600  | 4.79147300  | -3.15701400 |

|   |             |            |             |
|---|-------------|------------|-------------|
| H | -0.28317800 | 6.38938000 | -2.48724100 |
| H | 1.65382000  | 6.18394300 | -0.95526100 |
| H | 2.13724600  | 3.43869300 | -2.23834100 |
| H | 1.32308500  | 4.13376000 | 0.63568300  |
| H | -0.24274600 | 2.69490500 | -1.58051400 |
| H | -0.83696500 | 2.94567400 | 0.04757700  |
| H | -0.80553400 | 5.40786500 | -0.27290700 |
| H | -1.78623600 | 4.60315100 | -1.49886800 |
| H | 2.18784500  | 5.89128100 | -2.60678200 |
| H | 3.16726700  | 4.23945300 | -1.05595400 |
| C | 6.61796300  | 2.52087400 | 0.17461800  |
| C | 6.00124100  | 1.35704800 | -0.61517600 |
| C | 4.49705600  | 1.56841200 | -0.85899100 |
| C | 3.75680000  | 1.79834800 | 0.47766600  |
| C | 4.36534400  | 2.97905100 | 1.26886500  |
| C | 5.87207400  | 2.75809800 | 1.49557300  |
| H | 6.57684800  | 3.43663700 | -0.43382200 |
| H | 7.67845800  | 2.32428100 | 0.37233900  |
| H | 6.15870400  | 0.41907700 | -0.06406900 |
| H | 4.36003900  | 2.43306700 | -1.51923000 |
| H | 3.91345000  | 0.89047900 | 1.08079600  |
| H | 4.22194400  | 3.91668800 | 0.71707700  |
| H | 3.86461100  | 3.10648200 | 2.23657600  |
| H | 6.01280900  | 1.88928300 | 2.15446400  |
| H | 6.29260800  | 3.62257100 | 2.02406900  |
| H | 6.51383400  | 1.23975700 | -1.57816600 |
| H | 4.06175800  | 0.70670900 | -1.37379100 |
| C | -0.33910000 | 0.13921600 | 4.13192000  |
| C | -0.42464700 | 1.65176700 | 3.88466600  |
| C | -0.06579100 | 2.01495700 | 2.43295600  |

|   |             |             |            |
|---|-------------|-------------|------------|
| C | 1.32995100  | 1.47754600  | 2.05039200 |
| C | 1.41778300  | -0.04591900 | 2.31334300 |
| C | 1.04984600  | -0.39568600 | 3.76295400 |
| H | -1.08744000 | -0.38590000 | 3.52097400 |
| H | -0.57100300 | -0.08588400 | 5.17984800 |
| H | 0.26245600  | 2.17212400  | 4.56829100 |
| H | -0.81748700 | 1.58200700  | 1.76302200 |
| H | 2.06480700  | 1.98667900  | 2.69246600 |
| H | 0.73831700  | -0.55365600 | 1.62230700 |
| H | 2.42251100  | -0.42263100 | 2.08755200 |
| H | 1.80178800  | 0.02612400  | 4.44662700 |
| H | -1.43025700 | 2.02615300  | 4.11458100 |
| H | -0.11156800 | 3.10264000  | 2.30331700 |
| H | 1.08270700  | -1.48419000 | 3.88975300 |

TS-S12

1 imaginary frequency

H = -3988.939853

G = -3989.024704

Esol = -3989.296924

|    |             |             |             |
|----|-------------|-------------|-------------|
| Se | 2.89724400  | -0.32194900 | -1.81610200 |
| I  | -1.21030600 | -2.74549400 | -0.22573600 |
| C  | -3.16521300 | -1.85069800 | -0.24251700 |
| C  | -3.68702300 | -1.39293800 | 0.96707600  |
| C  | -3.85465200 | -1.73166200 | -1.44859500 |
| C  | -4.96021000 | -0.81762000 | 0.96079700  |
| H  | -3.11025000 | -1.46701300 | 1.88247900  |
| C  | -5.12927600 | -1.16007000 | -1.43033700 |
| H  | -3.41796400 | -2.07505700 | -2.38016800 |

|   |             |             |             |
|---|-------------|-------------|-------------|
| C | -5.68046600 | -0.70531600 | -0.23042700 |
| H | -5.38538200 | -0.45630800 | 1.89290300  |
| H | -5.68461300 | -1.06579300 | -2.35920200 |
| H | -6.66973400 | -0.25693500 | -0.22534700 |
| N | 0.49994600  | -1.24729900 | 0.00101600  |
| S | 0.32802200  | -0.29939500 | 1.35462600  |
| O | -0.55447300 | -0.84884500 | 2.40677200  |
| O | 1.70761000  | 0.08987700  | 1.71667200  |
| C | -0.47901200 | 1.23267100  | 0.81352900  |
| C | -1.44414000 | 1.81878100  | 1.63562700  |
| C | -0.09942500 | 1.82602700  | -0.39571400 |
| C | -2.04451700 | 3.01562000  | 1.24942500  |
| H | -1.71779800 | 1.33357200  | 2.56580200  |
| C | -0.69558000 | 3.02132200  | -0.78695300 |
| H | 0.64994300  | 1.34662000  | -1.02071100 |
| C | -1.65960500 | 3.59672500  | 0.04284700  |
| H | -2.79679000 | 3.49915100  | 1.86024200  |
| H | -0.43236500 | 3.50791100  | -1.71809800 |
| N | -2.29533200 | 4.85726700  | -0.37188400 |
| O | -1.93053800 | 5.35947500  | -1.43485600 |
| O | -3.15497300 | 5.33586000  | 0.36841600  |
| C | 3.93915700  | 0.02946500  | -0.34434300 |
| C | 5.13546500  | 1.08698100  | 1.24524400  |
| C | 5.08081200  | -0.22799100 | 1.57740300  |
| H | 5.60637200  | 1.92133000  | 1.74034500  |
| H | 5.48899000  | -0.75839600 | 2.42287000  |
| N | 4.44022600  | 1.23641300  | 0.05677900  |
| N | 4.35914700  | -0.87144600 | 0.58948100  |
| C | 4.17854000  | 2.49772200  | -0.61769600 |
| H | 4.21651000  | 2.33933900  | -1.69691000 |

|   |            |             |             |
|---|------------|-------------|-------------|
| H | 3.18536600 | 2.87312300  | -0.35117600 |
| H | 4.93883200 | 3.22197600  | -0.31675400 |
| C | 3.95991100 | -2.27068600 | 0.59779400  |
| H | 2.87401200 | -2.33321700 | 0.70719000  |
| H | 4.25138300 | -2.74292600 | -0.34345500 |
| H | 4.45754400 | -2.76504600 | 1.43469100  |

TS-S13

1 imaginary frequency

H = -5028.514967

G = -5028.621825

Esol = -5028.992497

|    |            |             |             |
|----|------------|-------------|-------------|
| Se | 1.56576400 | -0.66838700 | -0.51257100 |
| N  | 2.64219400 | -0.41822400 | 0.94220700  |
| S  | 3.96545600 | -1.38676500 | 1.00943600  |
| O  | 3.96509500 | -2.47659800 | -0.00020800 |
| O  | 4.16169000 | -1.75193300 | 2.42717500  |
| C  | 5.35980000 | -0.31624500 | 0.59064000  |
| C  | 5.94687100 | -0.40798400 | -0.67370800 |
| C  | 5.81333500 | 0.61424000  | 1.53194100  |
| C  | 6.99581800 | 0.44482800  | -1.00961900 |
| H  | 5.58908300 | -1.15444200 | -1.37382200 |
| C  | 6.85872000 | 1.47059500  | 1.20327200  |
| H  | 5.35576300 | 0.65093100  | 2.51437200  |
| C  | 7.43185800 | 1.37371100  | -0.06605400 |
| H  | 7.47915600 | 0.39947900  | -1.97767300 |
| H  | 7.23859800 | 2.20152700  | 1.90620800  |
| N  | 8.53723200 | 2.27735200  | -0.41739900 |
| O  | 8.90541600 | 3.08896200  | 0.43216300  |



|   |             |             |             |
|---|-------------|-------------|-------------|
| O | 9.02902900  | 2.17107600  | -1.54126500 |
| I | -1.70168100 | 2.87882200  | 0.23968300  |
| C | -3.83608700 | 3.11400700  | 0.38469200  |
| C | -4.58027900 | 3.10284700  | -0.79468200 |
| C | -4.42431300 | 3.26039100  | 1.64062400  |
| C | -5.96441600 | 3.26992000  | -0.70270700 |
| H | -4.09831100 | 2.95315800  | -1.75461200 |
| C | -5.80881700 | 3.43476500  | 1.70818100  |
| H | -3.82632400 | 3.24782200  | 2.54553700  |
| C | -6.57613600 | 3.43959000  | 0.54124700  |
| H | -6.56157700 | 3.26750800  | -1.61011600 |
| H | -6.28346700 | 3.56117100  | 2.67707200  |
| H | -7.65252800 | 3.57085900  | 0.60249100  |
| N | -0.85407500 | 0.77276100  | -0.36560400 |
| S | -1.74887300 | 0.12668400  | -1.60450600 |
| O | -2.31146700 | 1.08911000  | -2.56977100 |
| O | -0.91213300 | -0.97906400 | -2.13656500 |
| C | -3.19622000 | -0.68676400 | -0.87013700 |
| C | -4.32518400 | -0.89219500 | -1.66964600 |
| C | -3.15822100 | -1.14063700 | 0.45039000  |
| C | -5.42609100 | -1.56621600 | -1.14770800 |
| H | -4.33873600 | -0.51519200 | -2.68642800 |
| C | -4.25596600 | -1.81317700 | 0.98167700  |
| H | -2.27956400 | -0.94380500 | 1.05502000  |
| C | -5.37115500 | -2.01711600 | 0.17060500  |
| H | -6.31762700 | -1.74282800 | -1.73669000 |
| H | -4.26604900 | -2.17341800 | 2.00297500  |
| N | -6.53521500 | -2.72583400 | 0.72991800  |
| O | -6.45673600 | -3.12065400 | 1.89276800  |
| O | -7.51322400 | -2.87997600 | 0.00028300  |

|   |             |             |             |
|---|-------------|-------------|-------------|
| C | 0.91377400  | -2.43093100 | -0.11612700 |
| C | 0.39422700  | -4.58475200 | -0.33585900 |
| C | 0.25989700  | -4.25580200 | 0.97769800  |
| H | 0.23868900  | -5.51969700 | -0.85025800 |
| H | -0.02641100 | -4.85121800 | 1.83010400  |
| N | 0.80416500  | -3.44541100 | -0.99915200 |
| N | 0.57355900  | -2.91515600 | 1.09957200  |
| C | 1.13667800  | -3.35018400 | -2.42122900 |
| H | 0.41561900  | -2.70221100 | -2.92213500 |
| H | 2.14454600  | -2.93889500 | -2.51364300 |
| H | 1.10659700  | -4.35459500 | -2.84583600 |
| C | 0.59165100  | -2.16911100 | 2.36363800  |
| H | 0.22985600  | -1.15645700 | 2.18298500  |
| H | -0.06631300 | -2.68803300 | 3.06378500  |
| H | 1.61195900  | -2.11126600 | 2.74979400  |

TS-S14

1 imaginary frequency

H = -4942.682441

G = -4942.785458

Esol = -4943.173993

|    |             |             |             |
|----|-------------|-------------|-------------|
| Se | -0.18284300 | -1.86378200 | 0.71978500  |
| N  | 1.11099300  | -1.73495500 | -0.52791400 |
| N  | -1.51707300 | -1.69383400 | -0.50931800 |
| S  | 2.55200200  | -2.01338000 | 0.19233900  |
| O  | 3.28078200  | -3.08600900 | -0.50197200 |
| O  | 2.37225100  | -2.11579100 | 1.67065700  |
| S  | -3.01795100 | -1.51224300 | 0.21659700  |
| O  | -2.91385000 | -1.69020000 | 1.67933300  |

|   |             |             |             |
|---|-------------|-------------|-------------|
| O | -3.97264700 | -2.31278100 | -0.55852500 |
| C | -0.33633000 | -4.12405600 | 0.74098500  |
| C | -0.32212800 | -4.39190500 | -0.64823100 |
| C | -1.44849800 | -4.23540400 | -1.47331900 |
| H | 0.65754000  | -4.43747500 | -1.12271900 |
| H | -2.41789300 | -4.45229900 | -1.01538500 |
| H | -1.49103200 | -2.92225900 | -1.19984500 |
| H | 0.55685100  | -4.35998200 | 1.31527700  |
| H | -1.27296300 | -4.24149300 | 1.28597600  |
| C | -1.37565900 | -4.47883000 | -2.96825300 |
| H | -0.39544700 | -4.19985500 | -3.36899900 |
| H | -1.55247400 | -5.53495400 | -3.20751700 |
| H | -2.13733800 | -3.89446200 | -3.49478000 |
| C | -3.43402800 | 0.21654600  | -0.08267500 |
| C | -3.48231600 | 1.10330500  | 0.99289900  |
| C | -3.73899600 | 0.62590800  | -1.38428500 |
| C | -3.82374000 | 2.43518700  | 0.76462700  |
| H | -3.26554200 | 0.74468600  | 1.99229500  |
| C | -4.07804700 | 1.95484600  | -1.61816100 |
| H | -3.71990400 | -0.08930600 | -2.19931100 |
| C | -4.10925400 | 2.83714500  | -0.53755000 |
| H | -3.87479400 | 3.15608900  | 1.57090400  |
| H | -4.32287800 | 2.31371900  | -2.61014100 |
| N | -4.45989400 | 4.24893900  | -0.78350900 |
| O | -4.71003200 | 4.57920800  | -1.94119700 |
| O | -4.47420000 | 5.00831000  | 0.18386400  |
| C | 3.49593000  | -0.50568100 | -0.11691500 |
| C | 3.99029800  | -0.26092500 | -1.40229500 |
| C | 3.71827100  | 0.39316500  | 0.92770900  |
| C | 4.69398500  | 0.91255700  | -1.65382400 |

|   |             |             |             |
|---|-------------|-------------|-------------|
| H | 3.83330600  | -0.98925700 | -2.19048100 |
| C | 4.42664300  | 1.56758700  | 0.68438300  |
| H | 3.34745600  | 0.15904100  | 1.91889400  |
| C | 4.89544200  | 1.81095300  | -0.60497100 |
| H | 5.09197900  | 1.13822900  | -2.63541600 |
| H | 4.62304000  | 2.28750300  | 1.46910400  |
| N | 5.63143300  | 3.05868300  | -0.86871000 |
| O | 6.04144800  | 3.24921000  | -2.01307300 |
| O | 5.78653800  | 3.83980300  | 0.07001800  |
| C | 0.02826300  | 0.67619900  | 1.03426700  |
| C | 0.35650100  | 2.90333200  | 0.76324200  |
| C | 0.32378600  | 2.65988600  | 2.09984800  |
| H | 0.49332900  | 3.82457600  | 0.21689700  |
| H | 0.42741100  | 3.32681200  | 2.94268000  |
| N | 0.17579700  | 1.67869600  | 0.13494500  |
| N | 0.12274100  | 1.29194100  | 2.24088800  |
| C | 0.15678400  | 1.46258400  | -1.30971500 |
| H | -0.68617200 | 1.99455100  | -1.76061800 |
| H | 1.09144400  | 1.81711100  | -1.75353500 |
| H | 0.05862900  | 0.39096200  | -1.47534400 |
| C | 0.03767100  | 0.57965600  | 3.51105100  |
| H | 0.95975100  | 0.70828600  | 4.08550800  |
| H | -0.80891700 | 0.94286200  | 4.10168600  |
| H | -0.10133300 | -0.47714100 | 3.28878100  |

TS-S15

l imaginary frequency

H = -4942.711994

G = -4942.814257

Esol = -4943.208813

|    |             |             |             |
|----|-------------|-------------|-------------|
| Se | -0.00778000 | -1.31083000 | 0.38305200  |
| N  | -1.25695100 | -1.57849200 | -0.94726200 |
| N  | 1.58294200  | -1.64607600 | -0.95961200 |
| S  | -1.33308300 | -0.37017700 | -2.08493900 |
| O  | -0.01811400 | 0.22332000  | -2.39643500 |
| S  | 3.03070100  | -1.76976100 | -0.24144000 |
| C  | -2.30069900 | 0.98876700  | -1.35159100 |
| C  | -3.34230600 | 1.51249500  | -2.12172600 |
| C  | -1.97149700 | 1.54894200  | -0.11302200 |
| C  | -4.06588700 | 2.60714400  | -1.65215800 |
| H  | -3.57824800 | 1.05881800  | -3.07740900 |
| C  | -2.68859400 | 2.64241600  | 0.36095100  |
| H  | -1.18202500 | 1.10938600  | 0.48330000  |
| C  | -3.72647200 | 3.15365600  | -0.41729400 |
| H  | -4.87922400 | 3.03686400  | -2.22381600 |
| H  | -2.46063900 | 3.10001700  | 1.31567400  |
| N  | -4.49584200 | 4.30284400  | 0.09124800  |
| O  | -4.18792700 | 4.74996400  | 1.19576100  |
| O  | -5.40171100 | 4.74081000  | -0.61570500 |
| C  | 3.72171500  | -0.09465200 | -0.14708900 |
| C  | 5.10187700  | 0.08170600  | -0.26627400 |
| C  | 2.87082500  | 0.99115400  | 0.07764900  |
| C  | 5.64321100  | 1.35953400  | -0.14679600 |
| H  | 5.73528000  | -0.77587900 | -0.46446700 |
| C  | 3.40270100  | 2.27095300  | 0.19480900  |
| H  | 1.80129800  | 0.82572800  | 0.14176900  |
| C  | 4.78346300  | 2.43166700  | 0.08543000  |
| H  | 6.70795800  | 1.53675600  | -0.23450300 |
| H  | 2.77438800  | 3.13713700  | 0.36063200  |

|   |             |             |             |
|---|-------------|-------------|-------------|
| N | 5.35166500  | 3.78443500  | 0.21536500  |
| O | 6.57048400  | 3.90613600  | 0.10057900  |
| O | 4.57282400  | 4.71188600  | 0.43524700  |
| O | 2.74572600  | -2.18764000 | 1.15242600  |
| O | 3.99443700  | -2.54801200 | -1.03036700 |
| O | -2.16121800 | -0.87488300 | -3.18946800 |
| C | -1.59919300 | -1.25497000 | 1.98694600  |
| C | -2.09598400 | -1.21969000 | 4.19490800  |
| C | -3.26454100 | -1.34501000 | 3.51595600  |
| H | -1.89358600 | -1.16531200 | 5.25357300  |
| H | -4.28271500 | -1.42430400 | 3.86512300  |
| N | -1.08822300 | -1.16988800 | 3.24452900  |
| N | -2.93790800 | -1.36811700 | 2.16620300  |
| C | 0.33759500  | -1.01500900 | 3.55023300  |
| H | 0.65660100  | 0.01546100  | 3.36859900  |
| H | 0.49661900  | -1.25564300 | 4.60259300  |
| H | 0.93697400  | -1.68641300 | 2.93253000  |
| C | -3.92024800 | -1.47156000 | 1.08852100  |
| H | -4.56088300 | -0.58506100 | 1.07939800  |
| H | -3.37776900 | -1.54349800 | 0.14672300  |
| H | -4.53788700 | -2.36221300 | 1.23656100  |
| H | 1.57415400  | -1.13506300 | -1.84342500 |
| C | -0.13924700 | -4.01397800 | 0.55769900  |
| C | -0.25611700 | -4.08445900 | -0.80035800 |
| C | -1.41902600 | -3.60006700 | -1.44826300 |
| H | 0.63393900  | -4.24683200 | -1.40092200 |
| H | -2.34019900 | -3.62121900 | -0.87170600 |
| H | -1.01542800 | -3.90650900 | 1.19097400  |
| C | -1.58088300 | -3.76153900 | -2.93045200 |
| H | -1.82242400 | -4.81844200 | -3.12032000 |

|   |             |             |             |
|---|-------------|-------------|-------------|
| H | -2.37998800 | -3.14276700 | -3.33339200 |
| H | 0.80137600  | -4.22356100 | 1.05713000  |
| H | -0.65487800 | -3.53081300 | -3.46442600 |

TS-S16

1 imaginary frequency

H = -5171.911088

G = -5172.025482

Esol = -5172.475834

|   |             |             |             |
|---|-------------|-------------|-------------|
| N | 1.99019000  | -1.17143800 | -1.31954700 |
| N | -0.94454800 | -0.23187300 | -0.10262900 |
| S | 3.44054300  | -1.54378200 | -0.53887100 |
| O | 4.48153800  | -2.03546200 | -1.45496500 |
| O | 3.11726900  | -2.36665500 | 0.64052100  |
| S | -2.14192900 | -0.89759600 | -1.06405100 |
| O | -2.57219700 | -2.18437100 | -0.47618500 |
| O | -1.79191000 | -0.86543900 | -2.49188500 |
| C | 0.37156700  | -4.22082500 | -1.83965700 |
| C | 1.48957100  | -3.51550800 | -2.01174100 |
| C | 1.50460900  | -2.06428200 | -2.42619500 |
| H | 2.46140600  | -3.99261000 | -1.88831500 |
| H | 0.47094700  | -1.73422800 | -2.56653900 |
| H | -0.40466000 | 0.76451200  | -0.52843400 |
| H | 0.40369400  | -5.27661600 | -1.58032900 |
| H | -0.61220700 | -3.77636000 | -1.97160500 |
| C | 2.26282800  | -1.84077300 | -3.74434400 |
| H | 2.25576700  | -0.77647300 | -4.00309600 |
| H | 3.29972600  | -2.17838400 | -3.67268700 |
| H | 1.76531400  | -2.39438500 | -4.54821700 |

|   |             |             |             |
|---|-------------|-------------|-------------|
| C | -3.50114100 | 0.26901100  | -0.82205600 |
| C | -4.76294700 | -0.25831800 | -0.53954800 |
| C | -3.29680000 | 1.64459000  | -0.97659000 |
| C | -5.84933000 | 0.60282300  | -0.40332600 |
| H | -4.88390600 | -1.32976500 | -0.42731800 |
| C | -4.38120700 | 2.50629100  | -0.83304500 |
| H | -2.30388300 | 2.03892400  | -1.17687400 |
| C | -5.63771500 | 1.97138600  | -0.55051100 |
| H | -6.84409500 | 0.23402800  | -0.18630200 |
| H | -4.26682900 | 3.57827000  | -0.93620000 |
| C | 3.94105300  | 0.09287500  | 0.04077400  |
| C | 3.09949100  | 0.82753800  | 0.88046900  |
| C | 5.20529000  | 0.55614200  | -0.32134500 |
| C | 3.53096800  | 2.05808900  | 1.36221200  |
| H | 2.11586500  | 0.44443100  | 1.12815800  |
| C | 5.64496400  | 1.78490400  | 0.16771300  |
| H | 5.82734700  | -0.04137300 | -0.97831700 |
| C | 4.79905800  | 2.51180200  | 1.00117400  |
| H | 2.90867700  | 2.66788500  | 2.00483800  |
| H | 6.61937200  | 2.18241100  | -0.08716400 |
| N | -6.78270100 | 2.88649900  | -0.39215900 |
| N | 5.25961400  | 3.81209600  | 1.52281500  |
| O | -7.87779000 | 2.38953000  | -0.13114200 |
| O | 4.49903700  | 4.42809200  | 2.26899900  |
| O | -6.57304900 | 4.09092600  | -0.52604800 |
| O | 6.37563000  | 4.20053600  | 1.18345100  |
| O | -0.11913000 | 1.97702100  | -0.88828900 |
| C | 0.81137000  | 2.23173500  | -1.75294700 |
| O | 1.68943900  | 1.44053300  | -2.13769100 |
| C | 0.77691600  | 3.64403200  | -2.31960600 |



|    |             |             |             |
|----|-------------|-------------|-------------|
| H  | 1.68811200  | 3.85425400  | -2.88232700 |
| H  | -0.08626700 | 3.74509600  | -2.98829200 |
| H  | 0.65186400  | 4.37458400  | -1.51425900 |
| H  | 1.94907500  | -0.16624800 | -1.61368900 |
| Se | 0.15860400  | -1.46556300 | 0.74709200  |
| C  | -1.00835200 | -1.66049200 | 2.27744100  |
| C  | -2.34627300 | -2.57459800 | 3.80522600  |
| C  | -2.24086300 | -1.24493700 | 4.08625500  |
| H  | -2.89723700 | -3.35877100 | 4.29994400  |
| H  | -2.68575100 | -0.65094700 | 4.86914900  |
| N  | -1.58192600 | -2.81247800 | 2.68036500  |
| N  | -1.40269000 | -0.69691700 | 3.13571200  |
| C  | -1.45965000 | -4.08841200 | 1.96471200  |
| H  | -1.63889600 | -3.90283300 | 0.90449400  |
| H  | -0.46319500 | -4.51040900 | 2.11220100  |
| H  | -2.20990200 | -4.77359000 | 2.36118100  |
| C  | -0.99048300 | 0.70503500  | 3.03821500  |
| H  | 0.08911700  | 0.77960400  | 3.18794300  |
| H  | -1.24606800 | 1.09015600  | 2.04944800  |
| H  | -1.50758300 | 1.27245800  | 3.81251700  |

TS-S17

1 imaginary frequency

H = -6390.500661

G = -6390.589748

Esol = -6390.860705

|    |             |             |             |
|----|-------------|-------------|-------------|
| Se | 1.90600900  | -0.39386100 | -1.29300500 |
| I  | -2.76235000 | -0.84499400 | -1.18485100 |
| C  | -3.96687500 | -2.43886500 | -0.34562900 |

|   |             |             |             |
|---|-------------|-------------|-------------|
| C | -4.41355900 | -2.33012600 | 0.96759000  |
| C | -4.24798100 | -3.53701000 | -1.15558900 |
| C | -5.19751600 | -3.37034300 | 1.47569500  |
| H | -4.14134000 | -1.47655800 | 1.57977400  |
| C | -5.04402200 | -4.55761200 | -0.62876800 |
| H | -3.86321700 | -3.60640900 | -2.16771800 |
| C | -5.51683400 | -4.47431900 | 0.68242200  |
| H | -5.55661700 | -3.31021600 | 2.49924100  |
| H | -5.28160700 | -5.42015800 | -1.24509100 |
| H | -6.12936000 | -5.27452600 | 1.08802000  |
| N | -0.98405200 | -0.60646400 | 0.06179400  |
| S | -1.29250100 | 0.31931300  | 1.41300200  |
| O | -2.63301900 | 0.12142600  | 2.00943700  |
| O | -0.09859200 | 0.08843900  | 2.24775000  |
| C | -1.24143400 | 2.06008400  | 0.91842900  |
| C | -2.24883500 | 2.92311000  | 1.35604600  |
| C | -0.17475700 | 2.51621400  | 0.13557500  |
| C | -2.19596000 | 4.27135200  | 1.00770200  |
| H | -3.06071400 | 2.53371900  | 1.95987400  |
| C | -0.12077500 | 3.86203200  | -0.21627200 |
| H | 0.58709600  | 1.81893000  | -0.21324400 |
| C | -1.13057400 | 4.71740000  | 0.22779800  |
| H | -2.95697800 | 4.97249800  | 1.32691800  |
| H | 0.68413900  | 4.25314500  | -0.82622400 |
| N | -1.07342700 | 6.14095400  | -0.14387400 |
| O | -0.12167000 | 6.51611600  | -0.82781700 |
| O | -1.98152400 | 6.87268600  | 0.25132000  |
| C | 4.67063500  | -1.13146600 | 0.42039500  |
| C | 5.81083500  | -2.76300100 | 1.45328600  |
| C | 4.71600600  | -2.47350800 | 2.20547300  |

|    |            |             |             |
|----|------------|-------------|-------------|
| H  | 6.60327900 | -3.47941000 | 1.60188000  |
| H  | 4.36544700 | -2.89669700 | 3.13351600  |
| N  | 5.77106900 | -1.93181100 | 0.34710500  |
| N  | 4.02806800 | -1.45905000 | 1.56810500  |
| C  | 6.75104700 | -1.92031100 | -0.73315000 |
| H  | 7.13562400 | -2.93300400 | -0.87257500 |
| H  | 6.25406400 | -1.57944400 | -1.64389400 |
| H  | 7.57865700 | -1.24311600 | -0.50052300 |
| C  | 2.79729200 | -0.83165400 | 2.06293600  |
| H  | 1.97422300 | -1.01486700 | 1.36946700  |
| H  | 2.57700800 | -1.24454100 | 3.04765600  |
| H  | 2.94611800 | 0.24740200  | 2.13533800  |
| Se | 4.16385700 | 0.17040000  | -0.86477100 |

TS-S18

1 imaginary frequency

H = -7430.106203

G = -7430.218030

Esol = -7430.586901

|    |             |             |             |
|----|-------------|-------------|-------------|
| Se | -0.73841100 | 1.58510500  | -0.74615800 |
| N  | 0.89747800  | 1.83336400  | -1.40713000 |
| S  | 2.05138100  | 2.40962500  | -0.36275400 |
| O  | 1.63681800  | 2.50215000  | 1.05543100  |
| O  | 2.66187800  | 3.61540100  | -0.96812200 |
| C  | 3.32075500  | 1.13106900  | -0.45126000 |
| C  | 3.35252000  | 0.13372300  | 0.52647200  |
| C  | 4.24768000  | 1.15808100  | -1.49705600 |
| C  | 4.32211300  | -0.86290100 | 0.45324400  |
| H  | 2.62448700  | 0.14699600  | 1.33011500  |

|   |             |             |             |
|---|-------------|-------------|-------------|
| C | 5.21795500  | 0.16354100  | -1.57804900 |
| H | 4.20928100  | 1.95919100  | -2.22653200 |
| C | 5.23366300  | -0.83544200 | -0.60372900 |
| H | 4.38036200  | -1.65111800 | 1.19291300  |
| H | 5.95338200  | 0.14882700  | -2.37286700 |
| N | 6.24079000  | -1.90157200 | -0.70094500 |
| O | 7.09198900  | -1.81141900 | -1.58356900 |
| O | 6.16828800  | -2.83408500 | 0.10451800  |
| I | 0.13817700  | -2.57211800 | -0.83862500 |
| C | 1.39534300  | -3.85903600 | 0.35642800  |
| C | 2.72998900  | -3.99867800 | -0.01988600 |
| C | 0.84689600  | -4.50771800 | 1.45953300  |
| C | 3.54185900  | -4.85433000 | 0.72983300  |
| H | 3.13851500  | -3.45972600 | -0.86687100 |
| C | 1.67954600  | -5.35364200 | 2.19717900  |
| H | -0.18038800 | -4.33550800 | 1.75642700  |
| C | 3.01632100  | -5.53032000 | 1.83297700  |
| H | 4.58601300  | -4.96403400 | 0.45493500  |
| H | 1.27523900  | -5.86884000 | 3.06384800  |
| H | 3.65400800  | -6.18811800 | 2.41641600  |
| N | -0.54574700 | -0.68956000 | 0.30061700  |
| S | -1.68444300 | -1.10973700 | 1.44903300  |
| O | -1.31992500 | -2.31243300 | 2.22204900  |
| O | -1.95688800 | 0.14578000  | 2.17291500  |
| C | -3.22793900 | -1.55011300 | 0.60052800  |
| C | -4.01972300 | -2.56422300 | 1.14670900  |
| C | -3.64012300 | -0.84818500 | -0.53651700 |
| C | -5.23987200 | -2.88176700 | 0.55436300  |
| H | -3.67272800 | -3.09940900 | 2.02331900  |
| C | -4.85698800 | -1.16201200 | -1.13589300 |

|    |             |             |             |
|----|-------------|-------------|-------------|
| H  | -3.00978700 | -0.07517500 | -0.96395500 |
| C  | -5.63765100 | -2.17335800 | -0.57754900 |
| H  | -5.87847200 | -3.66192300 | 0.94975800  |
| H  | -5.20507500 | -0.64253400 | -2.02002100 |
| N  | -6.92521000 | -2.50945200 | -1.21110700 |
| O  | -7.25123700 | -1.87152200 | -2.21087800 |
| O  | -7.59353100 | -3.40711100 | -0.70070100 |
| C  | -0.69096700 | 4.66700500  | 0.68648700  |
| C  | 0.90457200  | 5.84280600  | 1.70816400  |
| C  | 0.31297700  | 5.04573800  | 2.63879400  |
| H  | 1.72030900  | 6.54269400  | 1.79235400  |
| H  | 0.51821600  | 4.91494500  | 3.68912300  |
| N  | 0.27293500  | 5.60448400  | 0.50636600  |
| N  | -0.67918000 | 4.33646000  | 1.99968500  |
| C  | 0.69123600  | 6.17332900  | -0.77829700 |
| H  | 1.08469300  | 7.17568400  | -0.59733300 |
| H  | 1.45865300  | 5.52638100  | -1.21215300 |
| H  | -0.17202900 | 6.22887400  | -1.44063800 |
| C  | -1.48039800 | 3.27552300  | 2.61158700  |
| H  | -1.03594400 | 2.30169600  | 2.39818100  |
| H  | -1.51543200 | 3.45210500  | 3.68807400  |
| H  | -2.48866800 | 3.30474600  | 2.19707000  |
| Se | -1.82288900 | 3.97911800  | -0.64429500 |

TS-S19

1 imaginary frequency

H = -7344.297650

G = -7344.403180

Esol = -7344.793112

|    |             |             |             |
|----|-------------|-------------|-------------|
| Se | -1.81152100 | 0.19046500  | 0.77256700  |
| N  | -2.18161000 | 0.82899900  | -0.82272400 |
| N  | -0.33662800 | 1.00219200  | 1.47646300  |
| S  | -1.68967300 | 2.25100100  | -1.47054500 |
| O  | -1.95735100 | 3.42531600  | -0.61177000 |
| O  | -2.24538500 | 2.24582100  | -2.83219500 |
| S  | 0.33957500  | 0.05688700  | 2.71710300  |
| O  | -0.63361600 | -0.97155100 | 3.13952300  |
| O  | 0.87832600  | 1.00681800  | 3.69512000  |
| C  | -3.28425800 | 1.27840100  | 2.11969100  |
| C  | -2.77472800 | 2.59595300  | 2.12508500  |
| C  | -1.62327700 | 2.95676200  | 2.85402400  |
| H  | -3.09913600 | 3.25522100  | 1.32388600  |
| H  | -1.46645100 | 2.42840800  | 3.79922700  |
| H  | -0.85172100 | 2.16691800  | 2.13125700  |
| H  | -4.19404700 | 1.08188600  | 1.55750400  |
| H  | -3.13819000 | 0.65430500  | 3.00080700  |
| C  | -1.07819800 | 4.37128700  | 2.80823700  |
| H  | -0.01659400 | 4.38080900  | 3.07369100  |
| H  | -1.18948400 | 4.79797300  | 1.80700900  |
| H  | -1.60181100 | 5.01835500  | 3.52297500  |
| C  | 1.73063300  | -0.77723900 | 1.94645300  |
| C  | 1.60978200  | -2.12479600 | 1.60454600  |
| C  | 2.91046200  | -0.06007600 | 1.72785100  |
| C  | 2.69646200  | -2.77123300 | 1.01732500  |
| H  | 0.68015100  | -2.65119500 | 1.77936500  |
| C  | 3.99831200  | -0.70507800 | 1.14605100  |
| H  | 2.97791100  | 0.98190900  | 2.01999200  |
| C  | 3.86881200  | -2.05117600 | 0.80466900  |
| H  | 2.64729400  | -3.81498700 | 0.73350400  |

|   |             |             |             |
|---|-------------|-------------|-------------|
| H | 4.92958000  | -0.18894500 | 0.94948900  |
| N | 5.02730000  | -2.74647000 | 0.20591500  |
| O | 6.07980800  | -2.12040800 | 0.11577200  |
| O | 4.86327600  | -3.91002300 | -0.15745900 |
| C | 0.10926200  | 2.17046000  | -1.60753500 |
| C | 0.81089100  | 3.37771100  | -1.67400300 |
| C | 0.76471300  | 0.94110000  | -1.67333800 |
| C | 2.19508500  | 3.35927900  | -1.81299800 |
| H | 0.27676100  | 4.31824800  | -1.59752100 |
| C | 2.15009700  | 0.91836800  | -1.81051200 |
| H | 0.21858700  | 0.00466800  | -1.61394900 |
| C | 2.84234000  | 2.12574000  | -1.87022200 |
| H | 2.77420500  | 4.27297200  | -1.86291900 |
| H | 2.69507200  | -0.01599300 | -1.85770200 |
| N | 4.31077600  | 2.09867500  | -1.96835300 |
| O | 4.89350200  | 3.16941300  | -2.13302300 |
| O | 4.86952200  | 1.00537300  | -1.86809700 |
| C | -2.49915200 | -2.36359500 | -1.20210000 |
| C | -4.73446100 | -2.50295000 | -0.97416000 |
| C | -4.47219000 | -2.03932900 | -2.22297800 |
| H | -5.66962300 | -2.71590100 | -0.48087500 |
| H | -5.13672400 | -1.75382500 | -3.02303700 |
| N | -3.51180000 | -2.69688100 | -0.34919600 |
| N | -3.09694100 | -1.96461400 | -2.35625300 |
| C | -3.29503700 | -3.20851900 | 0.99977700  |
| H | -4.25758700 | -3.51214100 | 1.41516100  |
| H | -2.61318800 | -4.06096700 | 0.96464500  |
| H | -2.84665800 | -2.43060300 | 1.62205000  |
| C | -2.38755100 | -1.41980100 | -3.51043100 |
| H | -2.35001200 | -0.32861900 | -3.44223800 |

|    |             |             |             |
|----|-------------|-------------|-------------|
| H  | -1.37609300 | -1.82809900 | -3.50184500 |
| H  | -2.90603600 | -1.72524000 | -4.42217900 |
| Se | -0.70539000 | -2.43012200 | -0.79314800 |

TS-S2

1 imaginary frequency

H = -7132.706281

G = -7132.818730

Esol = -7133.437498

|    |             |             |             |
|----|-------------|-------------|-------------|
| Se | -0.54481900 | -0.29690600 | 1.39293700  |
| I  | 3.61394300  | -2.77173100 | -0.22586000 |
| C  | 5.56403800  | -1.96134300 | 0.20021300  |
| C  | 6.27331700  | -1.38033900 | -0.85078500 |
| C  | 6.06221500  | -2.00900900 | 1.50142100  |
| C  | 7.53947300  | -0.85383500 | -0.58363000 |
| H  | 5.84372600  | -1.32817500 | -1.84545400 |
| C  | 7.33341600  | -1.48343000 | 1.74587300  |
| H  | 5.48136800  | -2.44412100 | 2.30764400  |
| C  | 8.06936600  | -0.90854900 | 0.70743400  |
| H  | 8.10851900  | -0.39863600 | -1.38933100 |
| H  | 7.74095300  | -1.51809900 | 2.75230100  |
| H  | 9.05434900  | -0.49626700 | 0.90654400  |
| N  | 2.04156900  | -1.23510700 | -0.39025900 |
| S  | 2.29842300  | -0.18594300 | -1.66086700 |
| O  | 3.26806400  | -0.64525200 | -2.67907700 |
| O  | 0.94318200  | 0.21646500  | -2.08844400 |
| C  | 3.03107600  | 1.30430500  | -0.93460900 |
| C  | 4.15607400  | 1.87310600  | -1.53530400 |
| C  | 2.43949000  | 1.87920600  | 0.19598400  |



|    |             |             |             |
|----|-------------|-------------|-------------|
| C  | 4.71096700  | 3.03329900  | -0.99866700 |
| H  | 4.58213200  | 1.40687400  | -2.41646600 |
| C  | 2.99091900  | 3.03677700  | 0.73621300  |
| H  | 1.56424100  | 1.41628500  | 0.64913500  |
| C  | 4.11909300  | 3.59469500  | 0.13109600  |
| H  | 5.58224500  | 3.50421900  | -1.43663000 |
| H  | 2.56455000  | 3.50932700  | 1.61242500  |
| N  | 4.70598800  | 4.81485600  | 0.70494900  |
| O  | 4.16314300  | 5.30090400  | 1.69740000  |
| O  | 5.70844900  | 5.28054800  | 0.16090200  |
| Se | -1.66812400 | 0.06146400  | -0.65364000 |
| P  | -3.85596100 | 0.00980800  | -0.09943300 |
| C  | -3.75579000 | 2.55571300  | 3.93074000  |
| C  | -4.50773000 | 1.21889500  | 3.92222500  |
| C  | -4.07926400 | 0.32876200  | 2.74249100  |
| C  | -4.29000200 | 1.06270600  | 1.39358900  |
| C  | -3.48725900 | 2.38820400  | 1.40819200  |
| C  | -3.91676100 | 3.27794300  | 2.58747600  |
| H  | -2.68892800 | 2.36851400  | 4.11382100  |
| H  | -4.11403100 | 3.18977100  | 4.75157300  |
| H  | -5.59090000 | 1.40785000  | 3.86377000  |
| H  | -3.01734100 | 0.07028400  | 2.83115000  |
| H  | -5.36227600 | 1.28909300  | 1.27345400  |
| H  | -2.42260400 | 2.14062600  | 1.49763900  |
| H  | -3.60964600 | 2.93871600  | 0.47309800  |
| H  | -4.96694800 | 3.58161400  | 2.45714700  |
| H  | -3.32184100 | 4.19951500  | 2.57443600  |
| H  | -4.33599800 | 0.67632400  | 4.86028500  |
| H  | -4.64215500 | -0.60689000 | 2.77859700  |
| C  | -5.35631500 | -4.38500900 | 1.14497800  |

|   |             |             |             |
|---|-------------|-------------|-------------|
| C | -3.93879400 | -4.16863200 | 0.59526300  |
| C | -3.47398100 | -2.71021800 | 0.74708700  |
| C | -4.48436300 | -1.75612300 | 0.06891000  |
| C | -5.89356800 | -1.94260600 | 0.68501800  |
| C | -6.35530600 | -3.40255800 | 0.51672300  |
| H | -5.34814400 | -4.24004700 | 2.23524300  |
| H | -5.68144000 | -5.41815800 | 0.96969900  |
| H | -3.91400700 | -4.44603100 | -0.46910400 |
| H | -3.38400800 | -2.46002100 | 1.81083900  |
| H | -4.54120900 | -2.05309900 | -0.99088400 |
| H | -5.86261600 | -1.70928400 | 1.75459600  |
| H | -6.62940000 | -1.26614300 | 0.24088000  |
| H | -6.46768100 | -3.62635200 | -0.55450100 |
| H | -7.34857600 | -3.52413700 | 0.96713100  |
| H | -3.22734900 | -4.82968100 | 1.10487700  |
| H | -2.47688600 | -2.57912300 | 0.31908600  |
| C | -6.31165500 | 2.30576200  | -3.54272500 |
| C | -6.65260600 | 0.84146800  | -3.23931600 |
| C | -6.16377300 | 0.39889800  | -1.84601900 |
| C | -4.65259300 | 0.66960300  | -1.67736000 |
| C | -4.33933400 | 2.15779600  | -1.95440100 |
| C | -4.81110700 | 2.56728500  | -3.35932100 |
| H | -6.87976100 | 2.96085100  | -2.86576800 |
| H | -6.62486600 | 2.56234100  | -4.56215400 |
| H | -6.18587400 | 0.19638100  | -3.99776500 |
| H | -6.72651200 | 0.94003900  | -1.07164400 |
| H | -4.12252000 | 0.07617800  | -2.43904900 |
| H | -4.86136100 | 2.78094100  | -1.21633000 |
| H | -3.26731200 | 2.34638400  | -1.84279200 |
| H | -4.24182500 | 2.00413000  | -4.11256800 |

|   |             |             |             |
|---|-------------|-------------|-------------|
| H | -4.58255700 | 3.62729600  | -3.52356400 |
| H | -7.73454900 | 0.67386600  | -3.31108300 |
| H | -6.38632200 | -0.66460500 | -1.72223900 |

TS-S20

1 imaginary frequency

H = -7344.321372

G = -7344.427848

Esol = -7344.821392

|    |             |             |             |
|----|-------------|-------------|-------------|
| Se | 1.41345600  | -1.65704700 | -0.07071100 |
| N  | -0.31140100 | -2.61212100 | -0.17020600 |
| N  | 0.81257600  | -0.27607500 | 0.89891400  |
| S  | -1.29085800 | -2.40262800 | -1.51316500 |
| O  | -1.49249800 | -3.68677500 | -2.19696600 |
| O  | -0.78931500 | -1.23706800 | -2.25164300 |
| S  | 1.15517200  | 1.24425800  | 0.29916300  |
| O  | 1.80226300  | 1.22613900  | -1.02310300 |
| O  | 1.78456600  | 2.03032000  | 1.37952600  |
| C  | 1.84805000  | -2.86952500 | 2.26139100  |
| C  | 1.08123800  | -1.98504300 | 2.99270700  |
| C  | 1.41963400  | -0.63085100 | 3.04524700  |
| H  | 0.08197300  | -2.28282300 | 3.30525400  |
| H  | 2.42826900  | -0.34792200 | 2.75202200  |
| H  | 1.52120500  | -3.89451600 | 2.10333300  |
| H  | 2.90019700  | -2.68487900 | 2.08161600  |
| C  | 0.64287100  | 0.35517500  | 3.85609300  |
| H  | 0.75449800  | 1.36414000  | 3.45654200  |
| H  | -0.41772300 | 0.09095000  | 3.91686200  |
| H  | 1.04358800  | 0.36402100  | 4.88114800  |

|   |             |             |             |
|---|-------------|-------------|-------------|
| C | -0.46914500 | 1.99435500  | 0.03451100  |
| C | -1.13043200 | 1.76857400  | -1.17596700 |
| C | -1.00690800 | 2.83196400  | 1.01435100  |
| C | -2.35924200 | 2.38300600  | -1.40347400 |
| H | -0.69723600 | 1.11297600  | -1.92146000 |
| C | -2.23535100 | 3.44879400  | 0.79030700  |
| H | -0.45612200 | 3.01520000  | 1.92958600  |
| C | -2.89008700 | 3.21220000  | -0.41684300 |
| H | -2.90317800 | 2.23202400  | -2.32752300 |
| H | -2.68249900 | 4.11023900  | 1.52192700  |
| N | -4.18592900 | 3.87187900  | -0.66175100 |
| O | -4.75120100 | 3.63903700  | -1.72902500 |
| O | -4.62164700 | 4.61536400  | 0.21616900  |
| C | -2.86406400 | -1.94932700 | -0.76043500 |
| C | -2.88409700 | -1.07621900 | 0.33074200  |
| C | -4.03896900 | -2.45754900 | -1.31672700 |
| C | -4.10833100 | -0.70239900 | 0.87611300  |
| H | -1.95104900 | -0.71969000 | 0.75510800  |
| C | -5.26653500 | -2.08382100 | -0.77347600 |
| H | -3.98721100 | -3.14619700 | -2.15279300 |
| C | -5.27784300 | -1.21336700 | 0.31351600  |
| H | -4.17163700 | -0.03288700 | 1.72476500  |
| H | -6.20179400 | -2.45754500 | -1.17115100 |
| N | -6.57481400 | -0.82837300 | 0.90169900  |
| O | -7.59213000 | -1.29210500 | 0.38991600  |
| O | -6.55722200 | -0.07000400 | 1.86983100  |
| H | -0.18212600 | -3.60882600 | 0.00380500  |
| C | 4.65967600  | 0.50090600  | -0.53786700 |
| C | 4.87875200  | 1.75040500  | -2.38517100 |
| C | 5.18263000  | 2.53529900  | -1.31974200 |

|    |            |             |             |
|----|------------|-------------|-------------|
| H  | 4.85463900 | 1.97080700  | -3.44043600 |
| H  | 5.47972200 | 3.57050600  | -1.26663700 |
| N  | 4.57201000 | 0.49457500  | -1.89271400 |
| N  | 5.05127000 | 1.75228600  | -0.18502300 |
| C  | 4.06205500 | -0.63620500 | -2.65608200 |
| H  | 4.13406900 | -0.40222500 | -3.71932200 |
| H  | 4.65342200 | -1.52565800 | -2.42503100 |
| H  | 3.02021000 | -0.81355800 | -2.37909500 |
| C  | 5.17687500 | 2.20554200  | 1.19587700  |
| H  | 5.73697200 | 3.14263600  | 1.20441000  |
| H  | 4.18035200 | 2.35258200  | 1.62053400  |
| H  | 5.71008800 | 1.44709400  | 1.77190800  |
| Se | 4.32152100 | -0.90849500 | 0.59818600  |

TS-S21

1 imaginary frequency

H = -7573.489864

G = -7573.608309

Esol = -7574.057181

|   |             |             |             |
|---|-------------|-------------|-------------|
| N | -1.96963200 | -0.53129300 | 1.55539600  |
| N | 0.85755400  | 0.44796500  | 0.13898700  |
| S | -3.34601700 | -1.28358400 | 0.91449100  |
| O | -4.27221300 | -1.73528000 | 1.96296200  |
| O | -2.88625000 | -2.28008400 | -0.07402600 |
| S | 2.10995900  | 0.12836500  | 1.18931400  |
| O | 2.65346100  | -1.21984900 | 0.91588700  |
| O | 1.76391800  | 0.45570000  | 2.58282200  |
| C | -0.03516100 | -3.11431100 | 2.75458600  |
| C | -1.22166200 | -2.51559300 | 2.87052200  |

|   |             |             |             |
|---|-------------|-------------|-------------|
| C | -1.40316000 | -1.01626200 | 2.85998900  |
| H | -2.12625300 | -3.10846000 | 3.00210900  |
| H | -0.41445500 | -0.54783700 | 2.87888500  |
| H | 0.27751300  | 1.49560900  | 0.27982100  |
| H | 0.05463300  | -4.19761600 | 2.80667700  |
| H | 0.88659100  | -2.55043200 | 2.63634600  |
| C | -2.20035400 | -0.50784200 | 4.07047300  |
| H | -2.31117300 | 0.57996900  | 4.01198600  |
| H | -3.19301200 | -0.96281000 | 4.11698100  |
| H | -1.65748100 | -0.75020500 | 4.99071300  |
| C | 3.36179100  | 1.31889800  | 0.65733600  |
| C | 4.68569800  | 0.87536100  | 0.60763400  |
| C | 3.02659400  | 2.64939100  | 0.38556500  |
| C | 5.69848700  | 1.76786200  | 0.26744600  |
| H | 4.91332000  | -0.15938400 | 0.83647200  |
| C | 4.03828100  | 3.54219200  | 0.03964200  |
| H | 1.99365800  | 2.98438300  | 0.42650700  |
| C | 5.35487600  | 3.08774000  | -0.01427000 |
| H | 6.73608800  | 1.46190800  | 0.21852300  |
| H | 3.81998600  | 4.57830000  | -0.18758700 |
| C | -4.12394300 | 0.07536200  | 0.01724500  |
| C | -3.46149300 | 0.69230000  | -1.04844400 |
| C | -5.41923600 | 0.43496800  | 0.38992900  |
| C | -4.11350900 | 1.69957700  | -1.75242700 |
| H | -2.44664700 | 0.40729400  | -1.30605600 |
| C | -6.07532600 | 1.43873900  | -0.31910500 |
| H | -5.89897800 | -0.06759900 | 1.22211800  |
| C | -5.40918700 | 2.05096200  | -1.37726900 |
| H | -3.63651700 | 2.21089700  | -2.57899600 |
| H | -7.08099000 | 1.74941600  | -0.06533900 |

|    |             |             |             |
|----|-------------|-------------|-------------|
| N  | 6.42287600  | 4.03348000  | -0.38472000 |
| N  | -6.10237000 | 3.11368700  | -2.13142900 |
| O  | 7.57379900  | 3.60033100  | -0.43980800 |
| O  | -5.49780700 | 3.63431000  | -3.06720700 |
| O  | 6.09984300  | 5.19672100  | -0.61801700 |
| O  | -7.24227600 | 3.41112500  | -1.77884800 |
| O  | -0.13965300 | 2.71812300  | 0.41564600  |
| C  | -1.15610900 | 3.00311300  | 1.15745000  |
| O  | -1.97568300 | 2.18957100  | 1.62823300  |
| C  | -1.32838900 | 4.48562100  | 1.45419100  |
| H  | -2.27320100 | 4.66880100  | 1.96878300  |
| H  | -0.50032100 | 4.82854200  | 2.08529400  |
| H  | -1.28736900 | 5.06239300  | 0.52465200  |
| H  | -2.03054400 | 0.52125300  | 1.53634600  |
| Se | -0.21742700 | -0.95147100 | -0.36118800 |
| C  | 1.69845700  | -3.22968100 | -1.51098400 |
| C  | 1.86129300  | -5.16298400 | -0.41567400 |
| C  | 3.11519500  | -4.64930800 | -0.54107000 |
| H  | 1.51263700  | -6.06851700 | 0.05505800  |
| H  | 4.06919700  | -5.02383000 | -0.20528300 |
| N  | 0.99550200  | -4.28178000 | -1.03169600 |
| N  | 2.99906100  | -3.45357400 | -1.22116800 |
| C  | -0.46519100 | -4.40553400 | -1.07306700 |
| H  | -0.72389300 | -5.46548800 | -1.08088500 |
| H  | -0.91212500 | -3.90755200 | -0.20982800 |
| H  | -0.81949300 | -3.92418800 | -1.98519300 |
| C  | 4.10300800  | -2.55138400 | -1.54077000 |
| H  | 3.67820500  | -1.58065000 | -1.79189300 |
| H  | 4.74039000  | -2.45106800 | -0.66202300 |
| H  | 4.67539200  | -2.94387200 | -2.38599700 |

|    |            |             |             |
|----|------------|-------------|-------------|
| Se | 0.96766100 | -1.73192900 | -2.37797000 |
|----|------------|-------------|-------------|

TS-S22

l imaginary frequency

H = -4064.155412

G = -4064.242466

Esol = -4064.517954

|    |             |             |             |
|----|-------------|-------------|-------------|
| Se | 2.34714300  | -0.97050300 | -1.52829900 |
| I  | -2.53295700 | -0.24362700 | -1.12909600 |
| C  | -3.99749900 | -1.54696100 | -0.20521800 |
| C  | -4.27575800 | -1.39710500 | 1.14921000  |
| C  | -4.60888900 | -2.50613900 | -1.00879700 |
| C  | -5.23175200 | -2.24848500 | 1.71169800  |
| H  | -3.75396100 | -0.65794500 | 1.74871700  |
| C  | -5.57002800 | -3.33601900 | -0.42516000 |
| H  | -4.35138300 | -2.61519700 | -2.05716100 |
| C  | -5.87936900 | -3.20763900 | 0.93031000  |
| H  | -5.46602000 | -2.15470200 | 2.76829000  |
| H  | -6.06426500 | -4.08843000 | -1.03321600 |
| H  | -6.62227900 | -3.86074400 | 1.37913600  |
| N  | -0.71415800 | -0.51181400 | 0.00152100  |
| S  | -0.66855100 | 0.46772100  | 1.34984200  |
| O  | -1.96647700 | 0.64031900  | 2.04054700  |
| O  | 0.47337600  | -0.08299500 | 2.10194300  |
| C  | -0.18818100 | 2.12842300  | 0.81353500  |
| C  | -0.90086100 | 3.23045700  | 1.29221400  |
| C  | 0.90694300  | 2.27975300  | -0.04494900 |
| C  | -0.51731600 | 4.51395000  | 0.90797000  |
| H  | -1.74463400 | 3.07468800  | 1.95488800  |



|   |             |             |             |
|---|-------------|-------------|-------------|
| C | 1.29056300  | 3.56108500  | -0.43211800 |
| H | 1.44027200  | 1.40585400  | -0.42152100 |
| C | 0.57344200  | 4.65612600  | 0.05237800  |
| H | -1.04338000 | 5.39395700  | 1.25654500  |
| H | 2.12823700  | 3.71937100  | -1.10022500 |
| N | 0.97867800  | 6.01187200  | -0.35729400 |
| O | 1.94884700  | 6.11648400  | -1.10649300 |
| O | 0.32222900  | 6.95969500  | 0.07456400  |
| C | 4.22527100  | -2.01490300 | 0.13098500  |
| C | 4.36436500  | -3.95248500 | 1.23600200  |
| C | 4.18361000  | -2.96449300 | 2.15089600  |
| H | 4.48011400  | -5.01726000 | 1.36132100  |
| H | 4.10431100  | -3.00521200 | 3.22551000  |
| N | 4.39586500  | -3.35444000 | -0.01590600 |
| N | 4.10970800  | -1.76429400 | 1.45887400  |
| C | 4.48297400  | -3.99940000 | -1.32180600 |
| H | 4.27400400  | -5.06351100 | -1.19860300 |
| H | 3.73423600  | -3.54349300 | -1.97665200 |
| H | 5.48006700  | -3.86771700 | -1.75157500 |
| C | 3.79233000  | -0.44789400 | 2.01054500  |
| H | 2.71192800  | -0.34848800 | 2.14554900  |
| H | 4.31738100  | -0.32606800 | 2.96115000  |
| H | 4.13714300  | 0.30386500  | 1.30006800  |
| O | 4.23317100  | -1.14376200 | -0.81705500 |

TS-S23

l imaginary frequency

H = -5103.791198

G = -5103.901527

Esol = -5104.273507

|   |             |             |             |
|---|-------------|-------------|-------------|
| N | -1.12087700 | -0.31116200 | 0.76107200  |
| S | -1.24585400 | -0.90995500 | -0.77917700 |
| O | -0.19989300 | -0.34115600 | -1.68237700 |
| O | -1.45622000 | -2.36799600 | -0.87473200 |
| C | -2.80702600 | -0.12900400 | -1.24414800 |
| C | -2.84077100 | 0.71179800  | -2.35714600 |
| C | -3.96985300 | -0.42934800 | -0.52686600 |
| C | -4.04968100 | 1.28164900  | -2.75426300 |
| H | -1.92556100 | 0.90514400  | -2.90502400 |
| C | -5.17845600 | 0.13977700  | -0.91392500 |
| H | -3.92834300 | -1.10106000 | 0.32376700  |
| C | -5.19697900 | 0.98949500  | -2.02105300 |
| H | -4.11555800 | 1.93862500  | -3.61266200 |
| H | -6.09960700 | -0.06235900 | -0.38169200 |
| N | -6.47538000 | 1.59656600  | -2.42905400 |
| O | -7.47547000 | 1.31749400  | -1.76863200 |
| O | -6.46531600 | 2.34773000  | -3.40334200 |
| C | -1.84883800 | -3.03321500 | 2.53738100  |
| C | -3.85482100 | -3.83933900 | 1.87618700  |
| C | -4.09285700 | -2.76902900 | 2.67593900  |
| H | -4.53943100 | -4.50571700 | 1.37509900  |
| H | -5.02205100 | -2.33562100 | 3.01186600  |
| N | -2.47919600 | -4.00891600 | 1.79777300  |
| N | -2.85950400 | -2.27881100 | 3.09386400  |
| C | -1.75992300 | -4.96178600 | 0.96671300  |
| H | -2.22514700 | -5.94822100 | 1.04891400  |
| H | -1.74944800 | -4.62347300 | -0.07215100 |
| H | -0.73393100 | -5.00952500 | 1.33395000  |
| C | -2.61100100 | -1.09199400 | 3.89408800  |

|   |             |             |             |
|---|-------------|-------------|-------------|
| H | -1.60349900 | -1.17008200 | 4.30509600  |
| H | -2.66971600 | -0.18992100 | 3.27703300  |
| H | -3.33709300 | -1.03825200 | 4.71022000  |
| O | -0.61961700 | -2.87612600 | 2.68608500  |
| I | 0.95529400  | 2.11057900  | -0.53727900 |
| C | 1.29849400  | 3.98539300  | 0.42519900  |
| C | 2.59737300  | 4.46822800  | 0.58217800  |
| C | 0.17970100  | 4.69516300  | 0.86651400  |
| C | 2.77019400  | 5.71110600  | 1.19495300  |
| H | 3.45182800  | 3.88129000  | 0.26955200  |
| C | 0.37440700  | 5.93887700  | 1.46954600  |
| H | -0.82062300 | 4.29211200  | 0.74981000  |
| C | 1.66565600  | 6.44524000  | 1.63258500  |
| H | 3.77496900  | 6.09985200  | 1.33211200  |
| H | -0.48512700 | 6.50437400  | 1.81744100  |
| H | 1.81159300  | 7.41162900  | 2.10646600  |
| N | 1.57096000  | 0.84086400  | 1.21181100  |
| S | 3.25269300  | 0.46213600  | 1.22521700  |
| O | 4.01786900  | 1.66792000  | 0.88179300  |
| O | 3.40285700  | -0.20227300 | 2.52534700  |
| C | 3.61864000  | -0.75600700 | -0.05213700 |
| C | 4.06037300  | -0.31518300 | -1.30288400 |
| C | 3.45675400  | -2.11571400 | 0.23005200  |
| C | 4.33166000  | -1.24892000 | -2.29916500 |
| H | 4.21304500  | 0.74253000  | -1.48325600 |
| C | 3.72742200  | -3.05203000 | -0.76504900 |
| H | 3.14322600  | -2.43615700 | 1.21580700  |
| C | 4.15426700  | -2.60066000 | -2.01162700 |
| H | 4.67972900  | -0.95038600 | -3.27990100 |
| H | 3.61482300  | -4.11419200 | -0.58858400 |

|    |            |             |             |
|----|------------|-------------|-------------|
| N  | 4.44450100 | -3.59273100 | -3.06540600 |
| O  | 4.29416800 | -4.77973200 | -2.78468600 |
| O  | 4.82039200 | -3.16776100 | -4.15623600 |
| Se | 0.39893600 | -0.87172400 | 1.56443200  |

TS-S24

l imaginary frequency

H = -5017.988394

G = -5018.093217

Esol = -5018.485762

|    |            |             |             |
|----|------------|-------------|-------------|
| Se | 2.15773700 | -1.01841300 | 0.86441100  |
| N  | 2.47105600 | 0.44509300  | 1.76957500  |
| N  | 1.75103200 | -0.65414100 | -0.87265800 |
| S  | 2.88378100 | 1.88898900  | 1.09656000  |
| O  | 3.71904900 | 1.73427400  | -0.11429200 |
| O  | 3.36223600 | 2.72385900  | 2.20068400  |
| S  | 0.98841500 | -1.98155900 | -1.59758500 |
| O  | 1.19291600 | -3.19707000 | -0.77760900 |
| O  | 1.42066600 | -1.98268500 | -2.99976000 |
| C  | 4.17895100 | -1.86301600 | 0.44434000  |
| C  | 4.70806500 | -0.96807700 | -0.52007900 |
| C  | 4.28247300 | -0.97518300 | -1.86322000 |
| H  | 5.22240400 | -0.08482700 | -0.15080200 |
| H  | 4.01930300 | -1.95425400 | -2.27433200 |
| H  | 3.07633100 | -0.63034300 | -1.53105900 |
| H  | 4.59927500 | -1.83232700 | 1.44715000  |
| H  | 3.85009200 | -2.84821600 | 0.11468400  |
| C  | 4.83680200 | 0.01516100  | -2.86984500 |
| H  | 4.98931900 | 0.99492000  | -2.40876400 |

|   |             |             |             |
|---|-------------|-------------|-------------|
| H | 5.79336900  | -0.33476600 | -3.27679600 |
| H | 4.14507200  | 0.12987600  | -3.70989300 |
| C | -0.76821600 | -1.59884100 | -1.56629000 |
| C | -1.65693800 | -2.65590100 | -1.36613700 |
| C | -1.21206600 | -0.29847000 | -1.80737900 |
| C | -3.02606600 | -2.40394500 | -1.39409500 |
| H | -1.27909100 | -3.65449100 | -1.17803200 |
| C | -2.57849500 | -0.03677100 | -1.81414900 |
| H | -0.49936800 | 0.50444000  | -1.94891000 |
| C | -3.45988200 | -1.09666300 | -1.60143700 |
| H | -3.75247100 | -3.19239000 | -1.24143300 |
| H | -2.96008500 | 0.96551500  | -1.97040000 |
| N | -4.90678700 | -0.82214300 | -1.56095500 |
| O | -5.67186800 | -1.78385000 | -1.59586300 |
| O | -5.25868000 | 0.35498800  | -1.48042500 |
| C | 1.33120500  | 2.61846800  | 0.53975600  |
| C | 1.06604900  | 2.72347500  | -0.82578600 |
| C | 0.43073700  | 3.09492900  | 1.49583900  |
| C | -0.14106000 | 3.27661300  | -1.24776200 |
| H | 1.79914300  | 2.36912800  | -1.54034300 |
| C | -0.77173300 | 3.65873000  | 1.08175900  |
| H | 0.67588300  | 3.02962200  | 2.55013000  |
| C | -1.04545000 | 3.72008800  | -0.28503200 |
| H | -0.38749300 | 3.37071100  | -2.29849300 |
| H | -1.49445900 | 4.04345900  | 1.79070400  |
| N | -2.34254800 | 4.25844200  | -0.72629700 |
| O | -2.63745600 | 4.12893600  | -1.91557300 |
| O | -3.05925700 | 4.79035400  | 0.11952200  |
| C | -1.54347100 | -1.12647300 | 2.01760500  |
| C | -3.58796400 | -1.50218600 | 2.94767400  |

|   |             |             |            |
|---|-------------|-------------|------------|
| C | -2.85081200 | -2.61902700 | 3.13604600 |
| H | -4.60225700 | -1.27340500 | 3.23558000 |
| H | -3.09812700 | -3.55023400 | 3.62138500 |
| N | -2.79340400 | -0.58226300 | 2.26651300 |
| N | -1.59462400 | -2.39786500 | 2.56967600 |
| C | -3.17484000 | 0.75690000  | 1.85792500 |
| H | -3.54246300 | 1.32868100  | 2.71626900 |
| H | -2.28289600 | 1.24003600  | 1.45782500 |
| H | -3.94989900 | 0.73333700  | 1.08409200 |
| C | -0.49276300 | -3.34065900 | 2.55628800 |
| H | -0.74391000 | -4.23214200 | 1.97139700 |
| H | 0.36648000  | -2.85586900 | 2.09624500 |
| H | -0.23221900 | -3.64156700 | 3.57685400 |
| O | -0.60140000 | -0.58412000 | 1.42284700 |

TS-S25

1 imaginary frequency

H = -5018.016706

G = -5018.122839

Esol = -5018.518383

|    |             |             |             |
|----|-------------|-------------|-------------|
| Se | 0.03502100  | 0.48039400  | -0.68551700 |
| N  | 1.84353300  | 0.06528400  | -0.09808500 |
| N  | -0.56895300 | 1.52834800  | 0.63038700  |
| S  | 3.07319700  | 1.15093600  | -0.49408900 |
| O  | 3.21117500  | 2.24680700  | 0.47456300  |
| O  | 2.91598500  | 1.45613500  | -1.92108900 |
| S  | -0.73398500 | 0.82035300  | 2.10246900  |
| O  | -1.18071800 | 1.86534400  | 3.03292600  |
| O  | 0.44270000  | -0.00864200 | 2.45906200  |

|   |             |             |             |
|---|-------------|-------------|-------------|
| C | 0.03221500  | 2.75399300  | -2.03144100 |
| C | 0.35785500  | 3.57381100  | -0.96554300 |
| C | -0.55148300 | 3.77653800  | 0.06800800  |
| H | 1.39873600  | 3.84247700  | -0.80586600 |
| H | -1.59855200 | 3.56651800  | -0.12762100 |
| H | 0.77580800  | 2.50488600  | -2.78044500 |
| H | -1.00203100 | 2.50656300  | -2.25265200 |
| C | -0.23168300 | 4.53994600  | 1.30842900  |
| H | -0.69477200 | 4.07212100  | 2.18110300  |
| H | 0.84755700  | 4.60990200  | 1.46989900  |
| H | -0.63850500 | 5.55920800  | 1.22085000  |
| C | -2.11074100 | -0.33598200 | 1.90875800  |
| C | -1.88378500 | -1.59809000 | 1.35156300  |
| C | -3.39799900 | 0.08799100  | 2.24348800  |
| C | -2.96586100 | -2.43049400 | 1.08353600  |
| H | -0.87262700 | -1.92303000 | 1.13647800  |
| C | -4.48432000 | -0.74359300 | 1.98447200  |
| H | -3.53515500 | 1.06051500  | 2.70325700  |
| C | -4.25084300 | -1.97968500 | 1.38417200  |
| H | -2.83295800 | -3.41194400 | 0.64571100  |
| H | -5.49804200 | -0.44862400 | 2.22575400  |
| N | -5.39969000 | -2.82747100 | 1.03397100  |
| O | -6.52477400 | -2.41108800 | 1.30940700  |
| O | -5.17139200 | -3.89632200 | 0.46666800  |
| C | 4.51680600  | 0.08973400  | -0.29886900 |
| C | 5.31293500  | 0.22882900  | 0.83858600  |
| C | 4.82004500  | -0.83542000 | -1.30144500 |
| C | 6.43408200  | -0.58601400 | 0.98663200  |
| H | 5.05916500  | 0.97072000  | 1.58761200  |
| C | 5.93890800  | -1.64903800 | -1.15832300 |

|   |             |             |             |
|---|-------------|-------------|-------------|
| H | 4.19218300  | -0.90586000 | -2.18271800 |
| C | 6.72369400  | -1.51051000 | -0.01349200 |
| H | 7.07965000  | -0.51243400 | 1.85285500  |
| H | 6.21336000  | -2.37801200 | -1.91045000 |
| N | 7.91048100  | -2.37440700 | 0.14029200  |
| O | 8.14400000  | -3.18391800 | -0.75561500 |
| O | 8.59071300  | -2.23160700 | 1.15435600  |
| H | 1.77457300  | -0.04576900 | 0.92548700  |
| C | -3.54481800 | 0.17641600  | -1.85060900 |
| C | -5.67965000 | -0.60595900 | -1.76140000 |
| C | -4.90679200 | -1.60121400 | -2.25153900 |
| H | -6.73631200 | -0.58151800 | -1.54593600 |
| H | -5.16194700 | -2.60832000 | -2.54158100 |
| N | -4.85031000 | 0.48834600  | -1.51530900 |
| N | -3.59496300 | -1.12941800 | -2.30499600 |
| C | -5.24634200 | 1.77798500  | -0.98639000 |
| H | -5.68858200 | 1.67163700  | 0.00972700  |
| H | -4.34650400 | 2.39066800  | -0.91612200 |
| H | -5.96724300 | 2.26772100  | -1.64983600 |
| C | -2.44149900 | -1.84174200 | -2.82018100 |
| H | -1.54302600 | -1.36650400 | -2.42555500 |
| H | -2.47151200 | -2.88361800 | -2.48914400 |
| H | -2.40891200 | -1.81397700 | -3.91563600 |
| O | -2.55112600 | 0.91365200  | -1.76477700 |

TS-S26

l imaginary frequency

H = -5247.168868

G = -5247.285202



Esol = -5247.737832

|   |             |             |             |
|---|-------------|-------------|-------------|
| N | 0.04769900  | -1.41757400 | 1.21723900  |
| N | -0.40639100 | 1.10499700  | -0.24469300 |
| S | 1.37224000  | -2.19413100 | 2.07035600  |
| O | 1.11526400  | -3.62906000 | 2.19261900  |
| O | 1.63417700  | -1.36033600 | 3.24497700  |
| S | -1.85864800 | 1.94398100  | -0.20748300 |
| O | -1.82469500 | 2.87884900  | -1.33924700 |
| O | -2.13027300 | 2.43303200  | 1.15292600  |
| C | -2.14678400 | -2.15633200 | 4.03032000  |
| C | -1.54705900 | -1.39492100 | 3.11645800  |
| C | -1.35572200 | -1.75419000 | 1.66428100  |
| H | -1.17772600 | -0.40519400 | 3.37888800  |
| H | -1.93522600 | -1.03567400 | 1.07168800  |
| H | -0.01924500 | 0.60091500  | -1.31698600 |
| H | -2.27590400 | -1.80472100 | 5.04976000  |
| H | -2.52621200 | -3.14983200 | 3.80965900  |
| C | -1.79590700 | -3.15818400 | 1.23992500  |
| H | -1.30283800 | -3.93646100 | 1.82446900  |
| H | -2.87946700 | -3.24740900 | 1.37054900  |
| H | -1.56718700 | -3.31528600 | 0.18152000  |
| C | -3.13584100 | 0.73157600  | -0.60484200 |
| C | -4.11983600 | 0.44588200  | 0.34376300  |
| C | -3.13916300 | 0.13250300  | -1.86905300 |
| C | -5.12689100 | -0.46497500 | 0.02881900  |
| H | -4.09229700 | 0.93839600  | 1.30944600  |
| C | -4.13987900 | -0.78103000 | -2.18433000 |
| H | -2.36715900 | 0.37566600  | -2.59147700 |
| C | -5.11640700 | -1.06334300 | -1.22892200 |
| H | -5.91118500 | -0.71160600 | 0.73367600  |

|    |             |             |             |
|----|-------------|-------------|-------------|
| H  | -4.17861600 | -1.27059400 | -3.14939700 |
| C  | 2.72281600  | -1.96073700 | 0.90024900  |
| C  | 3.62499800  | -0.91769800 | 1.11974400  |
| C  | 2.87079800  | -2.86273100 | -0.15422600 |
| C  | 4.69643700  | -0.75853800 | 0.24548600  |
| H  | 3.48827100  | -0.24732000 | 1.95969400  |
| C  | 3.94294500  | -2.70462700 | -1.02978500 |
| H  | 2.15888300  | -3.66687700 | -0.29475900 |
| C  | 4.83051200  | -1.65301000 | -0.81506800 |
| H  | 5.42311900  | 0.03343200  | 0.37586800  |
| H  | 4.09735700  | -3.37747900 | -1.86378200 |
| N  | -6.17883700 | -2.02998200 | -1.56367700 |
| N  | 5.96206500  | -1.47835300 | -1.74909500 |
| O  | -6.15475600 | -2.53711900 | -2.68379600 |
| O  | 6.72301400  | -0.53384100 | -1.54793300 |
| O  | -7.02227800 | -2.27023200 | -0.70120700 |
| O  | 6.06796900  | -2.28500400 | -2.67027100 |
| O  | 0.31840000  | 0.10928900  | -2.40888900 |
| C  | 0.41169200  | -1.17821200 | -2.44062900 |
| O  | 0.24569300  | -1.94582100 | -1.46855000 |
| C  | 0.77841100  | -1.76127900 | -3.79455100 |
| H  | 0.27258200  | -1.21984300 | -4.59836300 |
| H  | 1.85795800  | -1.64647100 | -3.95214400 |
| H  | 0.53117100  | -2.82389500 | -3.83366800 |
| H  | 0.14135500  | -1.59763400 | 0.17986600  |
| Se | 0.53435800  | 0.80737600  | 1.25792600  |
| C  | 1.14799100  | 3.70036000  | 0.49496700  |
| C  | 0.35127100  | 5.50895300  | -0.57294100 |
| C  | 1.11906500  | 4.82077700  | -1.45208800 |
| H  | -0.21430200 | 6.41882600  | -0.69503500 |

|   |             |            |             |
|---|-------------|------------|-------------|
| H | 1.34689000  | 5.01328000 | -2.48828000 |
| N | 0.36952300  | 4.81424300 | 0.62908800  |
| N | 1.61415200  | 3.70527200 | -0.78930000 |
| C | -0.37607100 | 5.13375700 | 1.83861200  |
| H | -1.44733400 | 5.01767000 | 1.65959000  |
| H | -0.07015200 | 4.42515900 | 2.60805200  |
| H | -0.14801000 | 6.15399700 | 2.16016700  |
| C | 2.43672700  | 2.64653100 | -1.35895100 |
| H | 1.91184300  | 2.16647300 | -2.18863100 |
| H | 3.39576400  | 3.05115000 | -1.69625300 |
| H | 2.60418700  | 1.90370300 | -0.57922100 |
| O | 1.40695200  | 2.85472600 | 1.40428300  |

TS-S27

1 imaginary frequency

H = -7519.692759

G = -7519.809143

Esol = -7520.203663

|    |             |             |             |
|----|-------------|-------------|-------------|
| Se | 0.05051200  | -0.93105600 | -0.06409600 |
| N  | 0.99716400  | 0.02333000  | 1.15172700  |
| N  | 0.28511200  | 0.21478000  | -1.42248200 |
| S  | 1.10727300  | -0.76560600 | 2.56895900  |
| O  | 1.81991700  | 0.08333200  | 3.51460300  |
| O  | 1.45923500  | -2.18357900 | 2.41211200  |
| S  | -1.05558400 | 0.63945000  | -2.30842900 |
| O  | -2.29450500 | 0.29471100  | -1.61072600 |
| O  | -0.86065500 | 0.32306000  | -3.71331000 |
| C  | -2.34149800 | -3.01208000 | -1.97976600 |
| C  | -4.43507700 | -3.57761300 | -2.63638700 |

|   |             |             |             |
|---|-------------|-------------|-------------|
| C | -4.31247800 | -3.93416900 | -1.33768600 |
| H | -5.27132200 | -3.66333900 | -3.31231400 |
| H | -5.01952000 | -4.39079500 | -0.66309900 |
| N | -3.22707900 | -3.00861600 | -3.03415700 |
| N | -3.02742000 | -3.58349900 | -0.92682600 |
| C | -2.91566700 | -2.46193500 | -4.34391100 |
| H | -1.99756900 | -1.88031900 | -4.26035700 |
| H | -2.78075100 | -3.26232000 | -5.08031400 |
| H | -3.72242900 | -1.80045600 | -4.67203400 |
| C | -2.45153900 | -3.79021500 | 0.38979700  |
| H | -1.62718900 | -3.08977500 | 0.51327000  |
| H | -3.19952300 | -3.58440400 | 1.15945300  |
| H | -2.07615500 | -4.81292100 | 0.51073700  |
| O | -1.16337700 | -2.60478900 | -1.98184500 |
| C | 5.30070800  | 0.59117900  | 0.20597800  |
| C | 4.04009900  | 0.27892700  | -0.55358000 |
| C | 3.69602300  | -1.22075000 | -0.46373300 |
| C | 4.93935900  | -2.06272200 | -0.84340100 |
| C | 6.16249600  | -1.69410200 | 0.00212600  |
| C | 6.27207500  | -0.29759800 | 0.49337800  |
| H | 5.41540500  | 1.62211500  | 0.53888800  |
| H | 3.20644100  | 0.86554800  | -0.15402100 |
| H | 3.45599900  | -1.44113200 | 0.58187200  |
| H | 4.76632300  | -3.13674400 | -0.72734000 |
| H | 4.16764200  | 0.59169200  | -1.60111800 |
| H | 5.19770100  | -1.88829000 | -1.89849600 |
| C | 7.50891600  | 0.04277900  | 1.28025200  |
| H | 7.57518900  | -0.57315400 | 2.18411400  |
| H | 8.41256900  | -0.16681200 | 0.69692800  |
| H | 7.51255700  | 1.09629700  | 1.57451200  |

|    |             |             |             |
|----|-------------|-------------|-------------|
| O  | 7.03224000  | -2.52473500 | 0.21381800  |
| C  | 2.52937100  | -1.65820000 | -1.30803800 |
| C  | 2.28401400  | -1.14409000 | -2.60430100 |
| H  | 1.70784300  | -2.88587800 | 0.27068100  |
| H  | 3.08336400  | -0.61169600 | -3.11624300 |
| H  | 1.64845200  | -1.74252400 | -3.25925500 |
| C  | 1.48952300  | -2.43376200 | -0.69523700 |
| H  | 0.82654900  | -2.99865800 | -1.34696700 |
| H  | 1.43121600  | -0.30008500 | -2.22518600 |
| O  | -0.89259100 | 2.27725400  | -2.27013900 |
| C  | -0.98418300 | 2.88116000  | -0.97662000 |
| H  | -2.02906700 | 2.94878600  | -0.66246800 |
| H  | -0.40373400 | 2.30583500  | -0.24879000 |
| C  | -0.39975600 | 4.29422200  | -1.06191900 |
| Cl | -0.55853000 | 5.01692800  | 0.58438300  |
| Cl | 1.33291500  | 4.24144800  | -1.52946800 |
| Cl | -1.31339600 | 5.28904200  | -2.24412700 |
| O  | -0.48173700 | -0.90705500 | 3.12074600  |
| C  | -1.07315500 | 0.28770600  | 3.61297500  |
| H  | -0.61803700 | 1.17921500  | 3.17153500  |
| H  | -0.97913400 | 0.33454000  | 4.70187700  |
| C  | -2.56432100 | 0.28869100  | 3.25124200  |
| Cl | -3.38931600 | -1.14717400 | 3.95289900  |
| Cl | -2.77722000 | 0.28666500  | 1.46472800  |
| Cl | -3.28500400 | 1.79000700  | 3.94146700  |

TS-S28

1 imaginary frequency

H = -7519.692158

G = -7519.808993

Esol = -7520.202399

|    |             |             |             |
|----|-------------|-------------|-------------|
| Se | 0.02556600  | -0.97578200 | 0.84020500  |
| N  | -1.20131200 | 0.00100000  | 1.74277600  |
| N  | 1.02025800  | 0.40969400  | 0.29280300  |
| S  | -2.25268000 | -0.99422800 | 2.50284100  |
| O  | -2.60054800 | -0.49444900 | 3.82077000  |
| O  | -1.83216600 | -2.40846300 | 2.33526700  |
| S  | 1.26039000  | 0.51996500  | -1.34003000 |
| O  | 0.33509900  | -0.36151500 | -2.05692500 |
| O  | 2.67734000  | 0.55777600  | -1.66224300 |
| C  | 2.03657200  | -3.30757200 | -1.26555900 |
| C  | 1.38993100  | -4.88396500 | -2.76080400 |
| C  | 2.54398500  | -4.34006200 | -3.21071000 |
| H  | 0.76504800  | -5.65759600 | -3.17838600 |
| H  | 3.11736200  | -4.54658100 | -4.10067200 |
| N  | 1.07218500  | -4.24824700 | -1.56146200 |
| N  | 2.94981400  | -3.37783400 | -2.28929500 |
| C  | -0.07650100 | -4.50490900 | -0.71318500 |
| H  | -0.24487600 | -3.62235200 | -0.09729100 |
| H  | -0.96085100 | -4.68240400 | -1.33110400 |
| H  | 0.08680100  | -5.36980700 | -0.05996100 |
| C  | 4.09458600  | -2.48345900 | -2.41650800 |
| H  | 4.84862300  | -2.97101000 | -3.03890000 |
| H  | 3.79780600  | -1.53210400 | -2.86623600 |
| H  | 4.51814700  | -2.27690500 | -1.43291400 |
| O  | 2.07155500  | -2.56127200 | -0.26423700 |
| C  | 4.45862100  | 2.22793300  | 1.78078500  |
| C  | 3.49298400  | 1.59031300  | 2.74376200  |
| C  | 2.94985600  | 0.25442000  | 2.23197100  |

|    |             |             |             |
|----|-------------|-------------|-------------|
| C  | 4.02491000  | -0.62672800 | 1.57583000  |
| C  | 4.97771900  | 0.12247500  | 0.64815400  |
| C  | 5.11350700  | 1.59226800  | 0.79198100  |
| H  | 3.98485700  | 1.45322200  | 3.72214200  |
| H  | 4.61823700  | 3.29720400  | 1.91440900  |
| H  | 2.67060400  | 2.29246000  | 2.92129700  |
| C  | 6.03135000  | 2.28163700  | -0.17916300 |
| H  | 6.11790500  | 3.34884700  | 0.04506400  |
| H  | 7.02870900  | 1.82933400  | -0.16292600 |
| H  | 5.65106000  | 2.16760800  | -1.20057700 |
| O  | 5.65866900  | -0.50584100 | -0.15050400 |
| C  | 1.87474000  | -0.37271400 | 2.94564000  |
| C  | 1.05379900  | 0.37149400  | 3.94350300  |
| C  | 1.31940200  | -1.60584200 | 2.45265100  |
| H  | 1.95505700  | -2.28893600 | 1.89764400  |
| H  | 1.62046300  | 1.11329400  | 4.50811400  |
| H  | 0.55401900  | -0.31244600 | 4.63485800  |
| H  | 3.59472700  | -1.43503300 | 0.98204600  |
| H  | 0.58481400  | -2.09835000 | 3.08652900  |
| H  | 4.64342500  | -1.08597000 | 2.36245800  |
| H  | 2.18869300  | 0.52180200  | 1.28045100  |
| H  | 0.23557700  | 0.88025000  | 3.39672800  |
| O  | 0.78964100  | 2.07696300  | -1.60324400 |
| C  | -0.57943600 | 2.38353200  | -1.33020900 |
| H  | -0.90513200 | 1.90019100  | -0.40362000 |
| H  | -1.21221600 | 2.07035100  | -2.16513400 |
| C  | -0.70029000 | 3.90199300  | -1.16057400 |
| Cl | 0.28069700  | 4.46696200  | 0.23528900  |
| Cl | -2.44044400 | 4.26320100  | -0.85499900 |
| Cl | -0.16743500 | 4.75030500  | -2.65126600 |

|    |             |             |             |
|----|-------------|-------------|-------------|
| O  | -3.67075800 | -0.82193800 | 1.65019700  |
| C  | -3.65634600 | -1.35349100 | 0.33257000  |
| H  | -2.71058300 | -1.12259800 | -0.17075400 |
| H  | -3.81193900 | -2.43589500 | 0.35216200  |
| C  | -4.78561900 | -0.70730000 | -0.47775300 |
| Cl | -4.53128100 | 1.06067600  | -0.61834300 |
| Cl | -6.37715800 | -1.03915800 | 0.27709900  |
| Cl | -4.73078100 | -1.45811900 | -2.12354800 |

TS-S29

1 imaginary frequency

H = -5446.725711

G = -5446.847609

Esol = -5447.484423

|    |             |             |             |
|----|-------------|-------------|-------------|
| Se | 0.55022200  | 0.76244700  | -0.23944100 |
| N  | -0.68512600 | 2.03056700  | -0.19330300 |
| N  | -0.14928200 | -0.65450300 | -1.17290800 |
| S  | -1.55987600 | 2.49430000  | -1.50867200 |
| O  | -0.91483800 | 2.10576900  | -2.78436500 |
| O  | -1.91009700 | 3.90498900  | -1.28811500 |
| S  | 0.05988800  | -2.11208100 | -0.38906800 |
| O  | 1.08791200  | -2.00816200 | 0.67121900  |
| O  | 0.19597600  | -3.15524800 | -1.41201000 |
| C  | -1.51837700 | -2.36279700 | 0.45187900  |
| C  | -2.13167600 | -1.29573100 | 1.11370700  |
| C  | -2.05111100 | -3.65185400 | 0.48978900  |
| C  | -3.29275000 | -1.52517800 | 1.84354200  |
| H  | -1.72123300 | -0.29506100 | 1.04041900  |
| C  | -3.21473200 | -3.88593100 | 1.22003500  |



|   |             |             |             |
|---|-------------|-------------|-------------|
| H | -1.56183100 | -4.45447300 | -0.05087700 |
| C | -3.81004500 | -2.81924900 | 1.88874700  |
| H | -3.80083900 | -0.72546200 | 2.36752300  |
| H | -3.66133500 | -4.87077600 | 1.27721600  |
| N | -5.03355800 | -3.06595900 | 2.67530700  |
| O | -5.53828000 | -2.10598100 | 3.25533300  |
| O | -5.46741900 | -4.21556200 | 2.70673900  |
| C | -3.11995200 | 1.58811900  | -1.44589100 |
| C | -3.25223100 | 0.38815600  | -2.14756700 |
| C | -4.17837700 | 2.12173000  | -0.70554500 |
| C | -4.46311900 | -0.29799200 | -2.10227900 |
| H | -2.41590100 | 0.00068000  | -2.71612400 |
| C | -5.39045800 | 1.43871200  | -0.65560500 |
| H | -4.05381600 | 3.07019900  | -0.19519500 |
| C | -5.51013500 | 0.23904800  | -1.35572400 |
| H | -4.60794300 | -1.22961900 | -2.63488700 |
| H | -6.23710100 | 1.82062900  | -0.09879600 |
| N | -6.79517800 | -0.48286900 | -1.31300000 |
| O | -7.71488300 | 0.02797800  | -0.67613300 |
| O | -6.86805800 | -1.55231000 | -1.91692100 |
| C | 1.45582200  | 3.23435200  | 1.84123700  |
| C | 0.15977000  | 3.64487200  | 3.65701900  |
| C | 0.09722000  | 4.73399400  | 2.85738000  |
| H | -0.29956700 | 3.44573500  | 4.61251400  |
| H | -0.43609000 | 5.66373800  | 2.97817800  |
| N | 0.99650600  | 2.71847300  | 3.03572200  |
| N | 0.90335200  | 4.49147600  | 1.74724900  |
| C | 1.29052200  | 1.36240700  | 3.46378600  |
| H | 1.23715900  | 0.70063700  | 2.59699600  |
| H | 2.28967400  | 1.28411300  | 3.90496200  |

|   |            |             |             |
|---|------------|-------------|-------------|
| H | 0.54683600 | 1.05183800  | 4.20096200  |
| C | 0.98759200 | 5.30676000  | 0.54686100  |
| H | 0.10799900 | 5.15392800  | -0.08721500 |
| H | 1.07182700 | 6.36151000  | 0.82355700  |
| H | 1.88341000 | 5.00642700  | 0.00095400  |
| O | 2.20572900 | 2.66519300  | 1.02442300  |
| C | 3.74777800 | -0.16896800 | -2.08158000 |
| C | 3.84855100 | -0.41256600 | -0.54634400 |
| C | 5.28627900 | -0.78037000 | -0.06836100 |
| C | 5.77838000 | -1.96330200 | -0.91203700 |
| C | 5.63413100 | -1.81483000 | -2.41322200 |
| C | 4.20727300 | -1.42349900 | -2.83676300 |
| H | 3.50534900 | 0.46584200  | 0.00783400  |
| C | 5.18681900 | -1.18286100 | 1.44324200  |
| C | 6.29108300 | -3.08206900 | -0.38322600 |
| H | 6.32760200 | -1.04558500 | -2.78640300 |
| H | 3.52236300 | -2.25204200 | -2.61286700 |
| C | 6.50631100 | -3.31853400 | 1.08604700  |
| C | 6.40166000 | -2.01645500 | 1.88387800  |
| H | 6.58162000 | -3.89042600 | -1.05533000 |
| H | 5.76627400 | -4.04799400 | 1.45212900  |
| H | 7.32067900 | -1.42899000 | 1.75118400  |
| H | 4.17702900 | -1.25831200 | -3.92117500 |
| H | 7.48589400 | -3.79009900 | 1.24630300  |
| H | 6.32702300 | -2.23355300 | 2.95698100  |
| H | 4.30470200 | -1.83464200 | 1.52778000  |
| H | 3.17688300 | -1.23929200 | -0.29075800 |
| C | 4.97689100 | 0.00440500  | 2.39841500  |
| H | 5.88661200 | 0.60813200  | 2.49744100  |
| H | 4.16859200 | 0.67185000  | 2.08151800  |

|   |            |             |             |
|---|------------|-------------|-------------|
| H | 4.72696000 | -0.36901700 | 3.39884900  |
| C | 6.23647300 | 0.42834900  | -0.25691700 |
| H | 4.43813900 | 0.65783700  | -2.32466600 |
| C | 2.39695500 | 0.36630600  | -2.48056100 |
| C | 1.49522100 | -0.31500800 | -3.34015300 |
| H | 0.76546900 | 0.31633500  | -3.85297400 |
| H | 1.86377100 | -1.15302000 | -3.92566300 |
| C | 1.87205700 | 1.50915300  | -1.78376700 |
| H | 2.54546100 | 2.08861200  | -1.15766300 |
| H | 5.82171300 | 1.33469200  | 0.19729300  |
| H | 7.21132800 | 0.23351400  | 0.20193300  |
| H | 6.42436900 | 0.64685900  | -1.31281500 |
| H | 5.92164800 | -2.74919800 | -2.90774700 |
| H | 1.13962800 | 2.09494300  | -2.33659800 |
| H | 0.73362500 | -0.73783900 | -2.46491600 |

TS-S3

1 imaginary frequency

H = -8172.312382

G = -8172.447371

Esol = -8173.163999

|    |             |             |             |
|----|-------------|-------------|-------------|
| Se | 0.01295400  | -0.13317100 | -0.11797900 |
| N  | 0.53914900  | 1.47816700  | -0.71694500 |
| S  | 0.33469300  | 2.65902100  | 0.41392600  |
| O  | 1.18650500  | 2.46918200  | 1.62323200  |
| O  | -1.07884000 | 3.01022900  | 0.69096300  |
| C  | 1.04424300  | 4.04395900  | -0.50033100 |
| C  | 0.71378600  | 4.24507100  | -1.84443600 |
| C  | 1.86479400  | 4.94103600  | 0.18615200  |

|   |            |             |             |
|---|------------|-------------|-------------|
| C | 1.21780600 | 5.35610500  | -2.51366800 |
| H | 0.08827400 | 3.52473000  | -2.35884600 |
| C | 2.36856100 | 6.05834700  | -0.47647100 |
| H | 2.10653800 | 4.75314400  | 1.22636300  |
| C | 2.03622300 | 6.24584000  | -1.81657000 |
| H | 0.99201800 | 5.54221400  | -3.55625900 |
| H | 3.00877400 | 6.77576600  | 0.02165600  |
| N | 2.57220500 | 7.42115700  | -2.52281900 |
| O | 3.30067800 | 8.18517200  | -1.88979000 |
| O | 2.26052700 | 7.56931900  | -3.70399000 |
| I | 3.44154200 | 0.47090300  | 1.55519300  |
| C | 5.40140900 | -0.34155000 | 1.27331400  |
| C | 5.87230700 | -1.32684700 | 2.14224100  |
| C | 6.17605500 | 0.15500100  | 0.22319500  |
| C | 7.16785100 | -1.81353500 | 1.95424400  |
| H | 5.23943400 | -1.72159000 | 2.92743000  |
| C | 7.46938700 | -0.34316000 | 0.05253700  |
| H | 5.78603000 | 0.91167100  | -0.44919700 |
| C | 7.96373600 | -1.32313500 | 0.91602500  |
| H | 7.55084500 | -2.57985400 | 2.62208800  |
| H | 8.08516500 | 0.03482200  | -0.75843100 |
| H | 8.97016200 | -1.70775400 | 0.77774800  |
| N | 2.15877200 | -0.89185600 | 0.40101200  |
| S | 1.99365100 | -2.43113800 | 1.12307200  |
| O | 3.08742400 | -2.70003000 | 2.07444700  |
| O | 0.60359600 | -2.67115500 | 1.54653600  |
| C | 2.26838200 | -3.46462200 | -0.33285300 |
| C | 3.52183300 | -4.05282800 | -0.51298800 |
| C | 1.22359600 | -3.66890700 | -1.23791300 |
| C | 3.73940400 | -4.86401300 | -1.62380600 |

|    |             |             |             |
|----|-------------|-------------|-------------|
| H  | 4.30659100  | -3.88430300 | 0.21570000  |
| C  | 1.43876000  | -4.47608200 | -2.35135100 |
| H  | 0.25886100  | -3.20098200 | -1.07583600 |
| C  | 2.69366200  | -5.05898700 | -2.52433900 |
| H  | 4.69367500  | -5.34458900 | -1.79953900 |
| H  | 0.65767400  | -4.65942100 | -3.07843500 |
| N  | 2.92252300  | -5.91681700 | -3.70099800 |
| O  | 1.98217100  | -6.08348700 | -4.47576900 |
| O  | 4.04025600  | -6.41307200 | -3.83483100 |
| Se | -2.51263700 | -0.48408000 | -1.27478300 |
| P  | -4.16431700 | -0.38662400 | 0.17936700  |
| C  | -4.21427800 | 4.21910300  | 1.48856000  |
| C  | -4.49570700 | 3.14831600  | 2.55034200  |
| C  | -3.97835900 | 1.76216300  | 2.12140200  |
| C  | -4.59855500 | 1.34938000  | 0.76717500  |
| C  | -4.25804600 | 2.41686900  | -0.30120300 |
| C  | -4.78209500 | 3.79892600  | 0.12626400  |
| H  | -3.13023000 | 4.35508700  | 1.39677400  |
| H  | -4.64143500 | 5.18118700  | 1.79950800  |
| H  | -5.57912800 | 3.08773200  | 2.73800600  |
| H  | -2.88774400 | 1.79955200  | 2.02267300  |
| H  | -5.69319300 | 1.30254100  | 0.89004800  |
| H  | -3.17026500 | 2.45744400  | -0.41223600 |
| H  | -4.66748200 | 2.14847900  | -1.27913000 |
| H  | -5.88241600 | 3.78049400  | 0.17110800  |
| H  | -4.51330800 | 4.53500800  | -0.64155600 |
| H  | -4.02798800 | 3.42329700  | 3.50387300  |
| H  | -4.22116900 | 1.03591000  | 2.90275000  |
| C  | -3.59317900 | -2.72014800 | 4.32318600  |
| C  | -2.39659200 | -2.56562800 | 3.37490800  |

|   |             |             |             |
|---|-------------|-------------|-------------|
| C | -2.59828700 | -1.40267300 | 2.38951000  |
| C | -3.90685000 | -1.59538000 | 1.59294700  |
| C | -5.12549200 | -1.73803000 | 2.53554900  |
| C | -4.90237000 | -2.88620000 | 3.53894200  |
| H | -3.66639700 | -1.83070100 | 4.96654900  |
| H | -3.44579100 | -3.57758600 | 4.99168900  |
| H | -2.24858300 | -3.49653500 | 2.80944200  |
| H | -2.62741500 | -0.46007600 | 2.94632300  |
| H | -3.79707600 | -2.53962400 | 1.04140600  |
| H | -5.28311100 | -0.80293600 | 3.08806200  |
| H | -6.04501800 | -1.92948500 | 1.97026300  |
| H | -4.87843200 | -3.83905900 | 2.99009900  |
| H | -5.75942000 | -2.94082500 | 4.22214000  |
| H | -1.47091500 | -2.40072600 | 3.93725000  |
| H | -1.74274200 | -1.34436700 | 1.71418600  |
| C | -7.26006400 | -2.10510200 | -3.00649200 |
| C | -7.42730600 | -0.65316800 | -2.54324800 |
| C | -6.15583300 | -0.11596800 | -1.86273300 |
| C | -5.71448300 | -1.01711900 | -0.68807700 |
| C | -5.56362600 | -2.48430500 | -1.14981000 |
| C | -6.84094800 | -3.00075700 | -1.83456600 |
| H | -6.49319000 | -2.15132400 | -3.79301000 |
| H | -8.19216500 | -2.47269300 | -3.45313800 |
| H | -8.26994900 | -0.59134800 | -1.83849300 |
| H | -5.34016800 | -0.05800900 | -2.59511200 |
| H | -6.49515600 | -0.96992200 | 0.08603900  |
| H | -7.65774700 | -3.04340300 | -1.09870600 |
| H | -6.67502800 | -4.03009800 | -2.17569800 |
| H | -7.68213300 | -0.00459100 | -3.39047000 |
| H | -6.34367700 | 0.90347800  | -1.51207600 |

|   |             |             |             |
|---|-------------|-------------|-------------|
| H | -4.71828800 | -2.54886200 | -1.84659500 |
| H | -5.32396700 | -3.13563700 | -0.30217900 |

TS-S30

1 imaginary frequency

H = -5446.722102

G = -5446.846872

Esol = -5447.479214

|    |             |             |             |
|----|-------------|-------------|-------------|
| Se | -0.09779700 | -0.14361200 | -1.78646600 |
| N  | 0.88060100  | 1.09777400  | -1.00260000 |
| N  | -1.22261400 | -0.87656800 | -0.56917600 |
| S  | 0.31971600  | 2.00846800  | 0.24951900  |
| O  | 0.27873000  | 1.29132600  | 1.53303800  |
| O  | -0.88757200 | 2.78158800  | -0.13292700 |
| S  | -1.22752000 | -2.54807100 | -0.55658800 |
| O  | -0.72698300 | -3.09561000 | -1.83429700 |
| O  | -2.55372600 | -2.96984000 | -0.08524000 |
| C  | -0.04104300 | -2.96135200 | 0.73708900  |
| C  | -0.29346300 | -4.09451800 | 1.51349700  |
| C  | 1.10939200  | -2.19031000 | 0.91049700  |
| C  | 0.63681800  | -4.47832900 | 2.47588200  |
| H  | -1.21123500 | -4.65498300 | 1.37427700  |
| C  | 2.04055900  | -2.57236600 | 1.87074300  |
| H  | 1.26845000  | -1.29955800 | 0.31875400  |
| C  | 1.78993800  | -3.71166800 | 2.63287600  |
| H  | 0.48081000  | -5.34821000 | 3.10152700  |
| H  | 2.94489500  | -2.00166300 | 2.03800000  |
| N  | 2.78025900  | -4.11906000 | 3.64640000  |
| O  | 3.78936600  | -3.42616600 | 3.76800800  |

|   |            |             |             |
|---|------------|-------------|-------------|
| O | 2.53946700 | -5.12982600 | 4.30473500  |
| C | 1.68501400 | 3.18545300  | 0.34125200  |
| C | 1.83749000 | 4.14723500  | -0.66075500 |
| C | 2.53836100 | 3.13703800  | 1.44319900  |
| C | 2.87551900 | 5.06841400  | -0.56982200 |
| H | 1.14771800 | 4.17560800  | -1.49685900 |
| C | 3.58019500 | 4.05806300  | 1.54098500  |
| H | 2.37650100 | 2.38913400  | 2.21141700  |
| C | 3.73134300 | 5.00383000  | 0.53008400  |
| H | 3.03068500 | 5.82924400  | -1.32450100 |
| H | 4.26523300 | 4.05562000  | 2.37969700  |
| N | 4.83625000 | 5.97607000  | 0.62633500  |
| O | 5.58199700 | 5.89668400  | 1.60108800  |
| O | 4.94585700 | 6.80472500  | -0.27616400 |
| C | 3.38941900 | -2.04443200 | -1.84499000 |
| C | 5.47024400 | -2.23399300 | -0.94426800 |
| C | 4.99863700 | -3.48737900 | -1.13727300 |
| H | 6.41011700 | -1.89361900 | -0.53837000 |
| H | 5.45018800 | -4.44498300 | -0.92969900 |
| N | 4.48496900 | -1.34253400 | -1.36816700 |
| N | 3.72045100 | -3.37933800 | -1.68295600 |
| C | 4.55287500 | 0.10653000  | -1.37429400 |
| H | 4.86402600 | 0.47774200  | -0.39245400 |
| H | 5.25793000 | 0.46754000  | -2.13231600 |
| H | 3.55302200 | 0.48270400  | -1.59879200 |
| C | 2.82843800 | -4.46130900 | -2.05656600 |
| H | 2.72926100 | -5.17334500 | -1.23101800 |
| H | 1.85157300 | -4.02611400 | -2.27578000 |
| H | 3.19726700 | -4.99002000 | -2.94313200 |
| O | 2.34187400 | -1.58235500 | -2.31186600 |



|   |             |             |             |
|---|-------------|-------------|-------------|
| C | -3.63724400 | 0.09678700  | -1.53377800 |
| C | -3.93151300 | 1.33120500  | -0.65480600 |
| C | -4.57385300 | 1.05726400  | 0.74042000  |
| C | -5.74767300 | 0.09134300  | 0.55023700  |
| C | -5.43607500 | -1.16827000 | -0.22528700 |
| C | -4.80600800 | -0.88926900 | -1.60084500 |
| H | -3.02987700 | 1.92630900  | -0.51055400 |
| C | -5.08187900 | 2.43370800  | 1.29477100  |
| C | -6.97884600 | 0.31694700  | 1.02831200  |
| H | -4.74282800 | -1.80354600 | 0.33865300  |
| H | -5.57170200 | -0.45645800 | -2.26359600 |
| C | -7.37029200 | 1.50433500  | 1.86486800  |
| C | -6.13713500 | 2.23918100  | 2.39607000  |
| H | -7.76106700 | -0.41440400 | 0.81982000  |
| H | -7.99342500 | 2.19113700  | 1.26880600  |
| H | -5.70024700 | 1.66981000  | 3.22753500  |
| H | -4.49268300 | -1.83807900 | -2.04602300 |
| H | -8.01085900 | 1.17711700  | 2.69590000  |
| H | -6.42297900 | 3.21607100  | 2.80655500  |
| H | -5.59467300 | 2.93265400  | 0.45668700  |
| H | -4.63836000 | 1.94431700  | -1.23345900 |
| C | -3.96715100 | 3.37495900  | 1.77980200  |
| H | -3.51767800 | 3.01475600  | 2.71197600  |
| H | -3.15801100 | 3.49517700  | 1.05336100  |
| H | -4.38590400 | 4.36817200  | 1.98238800  |
| C | -3.52728600 | 0.42668800  | 1.69310800  |
| C | -2.82948600 | 0.24942000  | -2.70119200 |
| C | -2.88803700 | -0.76604500 | -3.80922000 |
| H | -3.91325500 | -0.93422900 | -4.15164000 |
| H | -2.27375500 | -0.46258300 | -4.66079700 |

|   |             |             |             |
|---|-------------|-------------|-------------|
| H | -2.50552700 | -1.73605300 | -3.45391800 |
| C | -1.69418900 | 1.11593800  | -2.70032600 |
| H | -1.21273300 | 1.27793600  | -3.66215300 |
| H | -1.66584800 | 1.97354100  | -2.03406300 |
| H | -3.26082500 | -0.58914600 | 1.39159800  |
| H | -2.60054600 | 1.00675600  | 1.71266400  |
| H | -3.92195300 | 0.36780200  | 2.71327100  |
| H | -6.35046800 | -1.75571600 | -0.36713800 |
| H | -2.61119800 | -0.46918300 | -0.96516800 |

TS-S4

1 imaginary frequency

H = -8086.515932

G = -8086.645462

Esol = -8087.382728

|    |             |            |             |
|----|-------------|------------|-------------|
| Se | -0.20809600 | 2.20027900 | 0.70974300  |
| N  | -1.78486700 | 2.06437300 | -0.12032400 |
| N  | 0.50882900  | 3.15982200 | -0.65339600 |
| S  | -2.91467100 | 1.42480800 | 0.86601400  |
| O  | -3.80597800 | 2.43923700 | 1.46737100  |
| O  | -2.31114500 | 0.45608400 | 1.82806800  |
| S  | 2.17126900  | 3.36630700 | -0.50464900 |
| O  | 2.61734100  | 3.09416700 | 0.87885700  |
| O  | 2.47720300  | 4.66062300 | -1.12211100 |
| C  | -0.62965300 | 4.06328700 | 2.00980800  |
| C  | -1.26612500 | 4.86547000 | 1.04177700  |
| C  | -0.55855900 | 5.55828000 | 0.03632100  |
| H  | -2.33492800 | 4.70371900 | 0.90565700  |
| H  | 0.42559900  | 5.94144200 | 0.32394400  |

|   |             |             |             |
|---|-------------|-------------|-------------|
| H | -0.11055700 | 4.44733000  | -0.50111500 |
| H | -1.24776800 | 3.61429000  | 2.78397100  |
| H | 0.39596200  | 4.28825800  | 2.29831000  |
| C | -1.28135900 | 6.38631800  | -1.00936300 |
| H | -0.67117000 | 6.48379900  | -1.91260900 |
| H | -2.23524200 | 5.92759500  | -1.28925300 |
| H | -1.48433700 | 7.39878500  | -0.63887900 |
| C | 2.83481000  | 2.05876100  | -1.54763800 |
| C | 3.95458900  | 1.36016800  | -1.09830700 |
| C | 2.24592300  | 1.79144500  | -2.78604200 |
| C | 4.49234600  | 0.35469800  | -1.89661500 |
| H | 4.38295400  | 1.59140400  | -0.12976100 |
| C | 2.77399300  | 0.78019000  | -3.58195300 |
| H | 1.37007400  | 2.34475200  | -3.10567300 |
| C | 3.88270900  | 0.07477200  | -3.11704900 |
| H | 5.35772300  | -0.21659600 | -1.58524700 |
| H | 2.33877100  | 0.52582200  | -4.54017000 |
| N | 4.42373600  | -1.01886500 | -3.94302400 |
| O | 5.34216400  | -1.69039100 | -3.47024600 |
| O | 3.92578800  | -1.19754100 | -5.05207800 |
| C | -3.89588300 | 0.52735700  | -0.35160100 |
| C | -5.28681400 | 0.56566400  | -0.24842700 |
| C | -3.25042200 | -0.20229700 | -1.35396200 |
| C | -6.05747100 | -0.14685600 | -1.16477800 |
| H | -5.75104500 | 1.16145200  | 0.52961700  |
| C | -4.01758900 | -0.91065100 | -2.27428000 |
| H | -2.16559400 | -0.20582900 | -1.40099500 |
| C | -5.40742500 | -0.87212700 | -2.16096700 |
| H | -7.13950600 | -0.14294000 | -1.12356600 |
| H | -3.56052900 | -1.48467600 | -3.07065300 |

|   |             |             |             |
|---|-------------|-------------|-------------|
| N | -6.21953300 | -1.62638300 | -3.13318600 |
| O | -5.62425200 | -2.26751700 | -3.99833500 |
| O | -7.44330000 | -1.57213000 | -3.01907700 |
| P | 0.71526100  | -1.83665900 | 1.15624200  |
| C | 4.50556800  | -4.08583500 | -0.54882600 |
| C | 3.16378300  | -4.82634900 | -0.53566100 |
| C | 1.98460100  | -3.86811200 | -0.30241000 |
| C | 2.15142800  | -3.03531900 | 0.99318900  |
| C | 3.51774200  | -2.31596400 | 0.99525000  |
| C | 4.68589200  | -3.28526700 | 0.74549700  |
| H | 4.54432300  | -3.40553300 | -1.41088400 |
| H | 5.33165100  | -4.79643400 | -0.67449900 |
| H | 3.17564700  | -5.58981600 | 0.25662300  |
| H | 1.89447800  | -3.17156100 | -1.14624400 |
| H | 2.09149400  | -3.70228600 | 1.86533400  |
| H | 3.49503400  | -1.54211800 | 0.21711900  |
| H | 3.67875800  | -1.80564300 | 1.94880100  |
| H | 4.76726000  | -3.97972500 | 1.59511700  |
| H | 5.62447200  | -2.71716600 | 0.71988700  |
| H | 3.00915900  | -5.36073300 | -1.48107700 |
| H | 1.05371000  | -4.44303500 | -0.27245100 |
| C | -2.84240900 | -5.05370600 | 1.16073400  |
| C | -2.96385800 | -3.77486500 | 0.31983100  |
| C | -1.59117900 | -3.14110500 | 0.04577700  |
| C | -0.85831100 | -2.84697500 | 1.37079800  |
| C | -0.68590300 | -4.15795900 | 2.17420300  |
| C | -2.05844100 | -4.79795400 | 2.45566400  |
| H | -2.32478200 | -5.82608700 | 0.57284800  |
| H | -3.83679100 | -5.45378700 | 1.39411900  |
| H | -3.59571700 | -3.04633100 | 0.84752900  |

|    |             |             |             |
|----|-------------|-------------|-------------|
| H  | -0.99215900 | -3.82535500 | -0.56919400 |
| H  | -1.49577500 | -2.15847000 | 1.94430900  |
| H  | -0.07863000 | -4.86526600 | 1.59442300  |
| H  | -0.15626000 | -3.99423600 | 3.11800700  |
| H  | -2.63808400 | -4.13079500 | 3.10978200  |
| H  | -1.91733400 | -5.73476700 | 3.00939100  |
| H  | -3.46447000 | -3.99161800 | -0.63194100 |
| H  | -1.69688800 | -2.22059300 | -0.52914900 |
| C  | 1.58039400  | 0.62568700  | 5.19466300  |
| C  | 0.48589900  | -0.45096700 | 5.18697200  |
| C  | 0.67351800  | -1.48383800 | 4.05685900  |
| C  | 0.78580700  | -0.76712700 | 2.69598000  |
| C  | 1.95280900  | 0.24158800  | 2.72284900  |
| C  | 1.71821700  | 1.29069400  | 3.81840600  |
| H  | 2.54245400  | 0.16706700  | 5.46730000  |
| H  | 1.36327300  | 1.37537000  | 5.96566800  |
| H  | -0.49375100 | 0.02972900  | 5.05556100  |
| H  | 1.57877600  | -2.07991700 | 4.24295900  |
| H  | -0.14033000 | -0.19333100 | 2.54499100  |
| H  | 2.89222200  | -0.27962100 | 2.94175500  |
| H  | 2.07505400  | 0.71491700  | 1.74662800  |
| H  | 0.80232300  | 1.85108200  | 3.58258700  |
| H  | 2.53966800  | 2.01640400  | 3.81430800  |
| H  | 0.45325800  | -0.97057700 | 6.15279800  |
| H  | -0.17614200 | -2.17207000 | 4.07383000  |
| Se | 0.65920600  | -0.51627300 | -0.56755300 |

TS-S5

1 imaginary frequency

H = -8086.538042

G = -8086.667723

Esol = -8087.409133

|    |             |             |             |
|----|-------------|-------------|-------------|
| Se | 0.03278500  | -0.32187300 | -1.04693200 |
| N  | -1.97593500 | 0.08012500  | -1.34589700 |
| N  | -0.14151500 | -1.99997100 | -1.67010400 |
| S  | -2.21537300 | 1.71715600  | -1.42779400 |
| O  | -2.22465600 | 2.23470700  | -2.80819600 |
| O  | -1.26732700 | 2.29065500  | -0.45222300 |
| S  | -0.10904300 | -3.21735800 | -0.54088300 |
| O  | 0.88688300  | -3.03547300 | 0.52606000  |
| O  | -0.11396200 | -4.47411700 | -1.30508400 |
| C  | 0.66062700  | 0.23333700  | -3.55003500 |
| C  | 0.06555400  | -0.88886800 | -4.08779700 |
| C  | 0.51332300  | -2.17051300 | -3.74177600 |
| H  | -0.90988100 | -0.79705200 | -4.56371900 |
| H  | 1.53251400  | -2.26501200 | -3.37617600 |
| H  | 0.21679500  | 1.21489500  | -3.69380000 |
| H  | 1.68243500  | 0.21016100  | -3.18303100 |
| C  | -0.11133400 | -3.41555300 | -4.28569100 |
| H  | 0.42272200  | -3.70539300 | -5.20299800 |
| H  | -0.03325800 | -4.23889300 | -3.57391400 |
| H  | -1.16339600 | -3.25819700 | -4.54400200 |
| C  | -1.72645300 | -3.06433700 | 0.25354200  |
| C  | -2.83372900 | -3.69759700 | -0.31267100 |
| C  | -1.85141900 | -2.25560500 | 1.38477400  |
| C  | -4.09359300 | -3.51095200 | 0.25072200  |
| H  | -2.70165100 | -4.33639400 | -1.17920400 |
| C  | -3.10708900 | -2.05688900 | 1.94843400  |
| H  | -0.96724800 | -1.81438700 | 1.82843000  |

|   |             |             |             |
|---|-------------|-------------|-------------|
| C | -4.21012400 | -2.67662700 | 1.36129200  |
| H | -4.97697600 | -3.98614200 | -0.15778300 |
| H | -3.24527100 | -1.43819000 | 2.82680900  |
| N | -5.54377200 | -2.43237400 | 1.93142900  |
| O | -6.48187700 | -3.10226400 | 1.50599600  |
| O | -5.64136100 | -1.55979400 | 2.79811300  |
| C | -3.88701100 | 1.93692700  | -0.78754000 |
| C | -4.73242500 | 2.83828800  | -1.43680500 |
| C | -4.29203900 | 1.25165900  | 0.36128400  |
| C | -6.00836900 | 3.06425600  | -0.92516200 |
| H | -4.39194600 | 3.34475900  | -2.33287700 |
| C | -5.56894800 | 1.46677800  | 0.87269400  |
| H | -3.62361400 | 0.54067500  | 0.83256100  |
| C | -6.40125500 | 2.37644700  | 0.22036800  |
| H | -6.69587900 | 3.75480400  | -1.39735200 |
| H | -5.92353900 | 0.93704000  | 1.74897900  |
| N | -7.75340200 | 2.61885400  | 0.76044400  |
| O | -8.06896700 | 2.02794700  | 1.79044600  |
| O | -8.47876400 | 3.40099900  | 0.14685600  |
| P | 3.54927800  | 0.50837300  | 0.63746900  |
| C | 1.90379700  | -0.48180200 | 5.01749400  |
| C | 3.41821000  | -0.53191500 | 4.76599500  |
| C | 3.82670100  | 0.28403500  | 3.52439400  |
| C | 3.03607200  | -0.20289500 | 2.29135100  |
| C | 1.52052200  | -0.04489800 | 2.54794800  |
| C | 1.10525000  | -0.88340100 | 3.76762100  |
| H | 1.62125200  | 0.54016900  | 5.31038800  |
| H | 1.64221900  | -1.13109800 | 5.86191600  |
| H | 3.73027700  | -1.57594800 | 4.62039500  |
| H | 3.61466600  | 1.34720100  | 3.70381200  |

|   |            |             |             |
|---|------------|-------------|-------------|
| H | 3.23172800 | -1.27335700 | 2.14252300  |
| H | 1.29323200 | 1.01019800  | 2.75592300  |
| H | 0.94327700 | -0.32502000 | 1.66178300  |
| H | 1.26317100 | -1.94646100 | 3.54075700  |
| H | 0.03125800 | -0.75593800 | 3.95556200  |
| H | 3.96234600 | -0.16216100 | 5.64402800  |
| H | 4.90802400 | 0.19785600  | 3.37049100  |
| C | 2.70115000 | 5.09860300  | -0.28241300 |
| C | 3.09202000 | 4.70149300  | 1.14739900  |
| C | 3.76340800 | 3.31720500  | 1.18263600  |
| C | 2.85261500 | 2.24952500  | 0.53525800  |
| C | 2.42075800 | 2.63843600  | -0.89430800 |
| C | 1.79145200 | 4.04041300  | -0.92051400 |
| H | 3.61330700 | 5.21558200  | -0.88683700 |
| H | 2.20200100 | 6.07530800  | -0.27871600 |
| H | 2.19318900 | 4.68472300  | 1.78031900  |
| H | 4.71560100 | 3.37403200  | 0.63988200  |
| H | 1.93299900 | 2.18822200  | 1.13184200  |
| H | 3.27943500 | 2.59261500  | -1.57645700 |
| H | 1.69144900 | 1.90588000  | -1.24475100 |
| H | 0.82973900 | 4.00541900  | -0.39253200 |
| H | 1.56034700 | 4.31083000  | -1.95810200 |
| H | 3.77034700 | 5.44496400  | 1.58460100  |
| H | 4.00611300 | 3.04759700  | 2.21772000  |
| C | 8.00825400 | -0.34261000 | -0.63382700 |
| C | 7.53147500 | -0.87661000 | 0.72278600  |
| C | 5.99774900 | -0.86587600 | 0.83099600  |
| C | 5.41825000 | 0.54483600  | 0.56766700  |
| C | 5.90941700 | 1.08395600  | -0.79645000 |
| C | 7.44328100 | 1.05852200  | -0.89871500 |



|    |             |             |             |
|----|-------------|-------------|-------------|
| H  | 7.67527000  | -1.02467300 | -1.42912800 |
| H  | 9.10441100  | -0.32468000 | -0.67228400 |
| H  | 7.95941500  | -0.26121900 | 1.52817600  |
| H  | 5.56629400  | -1.56054800 | 0.09905900  |
| H  | 5.74820100  | 1.22553200  | 1.36514900  |
| H  | 5.46504100  | 0.46808500  | -1.58867900 |
| H  | 5.54904000  | 2.10605600  | -0.95929200 |
| H  | 7.86945100  | 1.76672400  | -0.17262800 |
| H  | 7.74472300  | 1.41279200  | -1.89228300 |
| H  | 7.89707700  | -1.89823700 | 0.88357100  |
| H  | 5.69825700  | -1.23047200 | 1.82016200  |
| H  | -2.26150700 | -0.37011700 | -2.21880300 |
| Se | 2.87204000  | -0.80457400 | -0.94704500 |

TS-S6

1 imaginary frequency

H = -8315.709033

G = -8315.850551

Esol = -8316.647819

|   |             |             |            |
|---|-------------|-------------|------------|
| N | -2.37137300 | 0.94190700  | 1.73346200 |
| N | 0.29990900  | 1.89594600  | 0.16554500 |
| S | -3.37920800 | -0.41886500 | 1.61719900 |
| O | -4.29418200 | -0.53135200 | 2.76059200 |
| O | -2.52178900 | -1.58239400 | 1.30724800 |
| S | 1.40565400  | 2.47541400  | 1.27620900 |
| O | 2.19681200  | 1.35979000  | 1.82584600 |
| O | 0.76275400  | 3.40745900  | 2.21719100 |
| C | -0.34954900 | 0.65894200  | 4.64232600 |
| C | -1.55220500 | 0.55348400  | 4.07525000 |

|   |             |             |             |
|---|-------------|-------------|-------------|
| C | -2.07868400 | 1.55277500  | 3.07686100  |
| H | -2.24018500 | -0.23202900 | 4.38483600  |
| H | -1.27612200 | 2.25775700  | 2.84000400  |
| H | -0.46905400 | 2.68306600  | -0.30609600 |
| H | -0.02629400 | -0.03400800 | 5.41529100  |
| H | 0.34933300  | 1.44259700  | 4.36020700  |
| C | -3.27531600 | 2.35050800  | 3.62319100  |
| H | -3.63486900 | 3.05010500  | 2.86136100  |
| H | -4.09554000 | 1.69185000  | 3.91935200  |
| H | -2.95373800 | 2.92453800  | 4.49861700  |
| C | 2.49767000  | 3.45424400  | 0.22653300  |
| C | 3.86959000  | 3.20823700  | 0.29611900  |
| C | 1.97106900  | 4.46570900  | -0.58424000 |
| C | 4.74266900  | 3.98569000  | -0.46113700 |
| H | 4.23941400  | 2.41356600  | 0.93373500  |
| C | 2.84219300  | 5.23895100  | -1.34615200 |
| H | 0.89866800  | 4.62798900  | -0.64372100 |
| C | 4.21203500  | 4.98789000  | -1.26933600 |
| H | 5.81365200  | 3.82821900  | -0.43521200 |
| H | 2.47753000  | 6.02619600  | -1.99409000 |
| C | -4.35307600 | -0.05416500 | 0.14106200  |
| C | -3.72580900 | 0.12090300  | -1.09679000 |
| C | -5.74064200 | -0.01604900 | 0.27868000  |
| C | -4.51218300 | 0.34102300  | -2.22289700 |
| H | -2.64286400 | 0.11297000  | -1.17197800 |
| C | -6.52863100 | 0.19820500  | -0.85017500 |
| H | -6.18917200 | -0.15313500 | 1.25613600  |
| C | -5.89844000 | 0.37020600  | -2.07958200 |
| H | -4.07020500 | 0.49095600  | -3.19982100 |
| H | -7.60914400 | 0.23376300  | -0.79049000 |

|    |             |             |             |
|----|-------------|-------------|-------------|
| N  | 5.13280000  | 5.80759100  | -2.07708700 |
| N  | -6.73082400 | 0.59117500  | -3.27820900 |
| O  | 6.33566700  | 5.55778100  | -2.00105300 |
| O  | -6.15297000 | 0.72283300  | -4.35573300 |
| O  | 4.64432800  | 6.69107200  | -2.77973800 |
| O  | -7.95050100 | 0.62579600  | -3.12581900 |
| O  | -1.14129700 | 3.67379500  | -0.82893000 |
| C  | -2.36688000 | 3.85859100  | -0.48398200 |
| O  | -3.06590400 | 3.07740700  | 0.19723100  |
| C  | -2.97976700 | 5.16342000  | -0.97140000 |
| H  | -4.05391900 | 5.18198700  | -0.77875900 |
| H  | -2.50542300 | 6.00274200  | -0.44957800 |
| H  | -2.78502600 | 5.29508700  | -2.04038800 |
| H  | -2.66401000 | 1.70421400  | 1.06408200  |
| Se | -0.29851700 | 0.18423500  | 0.32866700  |
| Se | 1.40057200  | -0.77742600 | -1.26122800 |
| P  | 1.60304300  | -2.76744200 | -0.31505100 |
| C  | 3.35649400  | -1.27576500 | 3.80557000  |
| C  | 4.32933700  | -1.66871100 | 2.68604100  |
| C  | 3.62703000  | -1.73191700 | 1.31981100  |
| C  | 2.40417700  | -2.67788800 | 1.36629200  |
| C  | 1.42151300  | -2.27840800 | 2.49348800  |
| C  | 2.15367600  | -2.22713800 | 3.84467100  |
| H  | 3.00207900  | -0.25321000 | 3.62979000  |
| H  | 3.87430900  | -1.28135300 | 4.77282400  |
| H  | 4.77862300  | -2.64772500 | 2.91247700  |
| H  | 3.28131400  | -0.73613300 | 1.02371700  |
| H  | 2.75137500  | -3.70348200 | 1.55984500  |
| H  | 0.97749100  | -1.30429900 | 2.27004400  |
| H  | 0.59517700  | -2.99570100 | 2.55378600  |

|   |             |             |             |
|---|-------------|-------------|-------------|
| H | 2.49057900  | -3.23958300 | 4.11621600  |
| H | 1.44257600  | -1.91501900 | 4.61783600  |
| H | 5.15696000  | -0.95125300 | 2.62825800  |
| H | 4.33842600  | -2.06752300 | 0.55359400  |
| C | 5.02243500  | -5.12147500 | -2.67592700 |
| C | 4.29468800  | -3.96698000 | -3.37827700 |
| C | 3.59602900  | -3.03352300 | -2.37560100 |
| C | 2.62929400  | -3.83170500 | -1.47166800 |
| C | 3.37820200  | -4.97080300 | -0.74162200 |
| C | 4.07211400  | -5.89862300 | -1.75499600 |
| H | 5.85473700  | -4.71841800 | -2.08088900 |
| H | 5.46658700  | -5.79670900 | -3.41696200 |
| H | 3.54576400  | -4.37469600 | -4.07273300 |
| H | 4.34941600  | -2.53041900 | -1.75552900 |
| H | 1.86941800  | -4.28687500 | -2.12241600 |
| H | 4.13735300  | -4.53983900 | -0.07590500 |
| H | 2.69596200  | -5.55356900 | -0.11245600 |
| H | 3.30859100  | -6.40861500 | -2.35998300 |
| H | 4.61607500  | -6.68199200 | -1.21353000 |
| H | 4.99704500  | -3.38391400 | -3.98565800 |
| H | 3.05310500  | -2.24732500 | -2.91041500 |
| C | -2.37764900 | -5.31553900 | -0.73728800 |
| C | -2.30275300 | -3.92238400 | -1.37897500 |
| C | -0.84825300 | -3.45253600 | -1.54627500 |
| C | -0.10899700 | -3.48774000 | -0.18871300 |
| C | -0.15493500 | -4.90247300 | 0.42671300  |
| C | -1.61694200 | -5.35655800 | 0.59571800  |
| H | -1.94844400 | -6.06035500 | -1.42448300 |
| H | -3.42422900 | -5.60251700 | -0.58002900 |
| H | -2.83879000 | -3.20153200 | -0.75006000 |

|   |             |             |             |
|---|-------------|-------------|-------------|
| H | -0.33848800 | -4.11224700 | -2.26407700 |
| H | -0.62676200 | -2.79049500 | 0.48394300  |
| H | 0.36583900  | -5.60854000 | -0.23558100 |
| H | 0.35883000  | -4.93157900 | 1.39463300  |
| H | -2.11225400 | -4.69641900 | 1.31995900  |
| H | -1.63566700 | -6.36859800 | 1.01846000  |
| H | -2.79553500 | -3.92633500 | -2.35897900 |
| H | -0.80307800 | -2.44099900 | -1.96126900 |

TS-S7

1 imaginary frequency

H = -4806.378658

G = -4806.488508

Esol = -4807.112077

|    |             |             |             |
|----|-------------|-------------|-------------|
| Se | 1.05058500  | 0.31388300  | -2.23464600 |
| I  | -3.61806600 | -1.02217400 | -1.18051700 |
| C  | -4.29126800 | -2.78681000 | -0.12520100 |
| C  | -4.49766100 | -3.94879700 | -0.86595900 |
| C  | -4.48886000 | -2.71799800 | 1.25069700  |
| C  | -4.95508000 | -5.08523200 | -0.19372100 |
| H  | -4.31068400 | -3.97923700 | -1.93417200 |
| C  | -4.93488300 | -3.87203400 | 1.90169400  |
| H  | -4.27984900 | -1.80593400 | 1.79954400  |
| C  | -5.17280800 | -5.04668900 | 1.18500300  |
| H  | -5.12911700 | -6.00051000 | -0.75235100 |
| H  | -5.09450500 | -3.84472900 | 2.97587700  |
| H  | -5.52228100 | -5.93574400 | 1.70203600  |
| N  | -1.66977800 | -0.46695400 | -0.34228800 |
| S  | -1.82680800 | 0.41545700  | 1.06226900  |

|   |             |             |             |
|---|-------------|-------------|-------------|
| O | -2.95919600 | 0.02562400  | 1.93142900  |
| O | -0.45798600 | 0.38216500  | 1.62315300  |
| C | -2.13953200 | 2.13743100  | 0.60147700  |
| C | -3.19785500 | 2.82453800  | 1.19919600  |
| C | -1.30043000 | 2.75453000  | -0.33399700 |
| C | -3.42914400 | 4.15657800  | 0.85905500  |
| H | -3.82618700 | 2.31498400  | 1.92093300  |
| C | -1.52937200 | 4.08424400  | -0.67642700 |
| H | -0.48882800 | 2.19499900  | -0.79852600 |
| C | -2.58960300 | 4.76287900  | -0.07278500 |
| H | -4.23876400 | 4.72457700  | 1.30019500  |
| H | -0.90590700 | 4.59601500  | -1.39916900 |
| N | -2.83335500 | 6.16994900  | -0.43520300 |
| O | -2.07580200 | 6.68774600  | -1.25449400 |
| O | -3.78034600 | 6.74262300  | 0.10362700  |
| O | 2.89838000  | -0.12667200 | -1.66742500 |
| P | 3.13177100  | -0.38196300 | -0.12743100 |
| C | 7.58512000  | -1.52094900 | -1.20617600 |
| C | 6.68796900  | -2.61076600 | -0.60697200 |
| C | 5.19797800  | -2.23610400 | -0.68368400 |
| C | 4.91740100  | -0.87001100 | -0.01321700 |
| C | 5.83425800  | 0.22546000  | -0.61245800 |
| C | 7.31846700  | -0.16911900 | -0.53285400 |
| H | 7.38531300  | -1.43634400 | -2.28410400 |
| H | 8.64179700  | -1.79732700 | -1.10232100 |
| H | 6.96650000  | -2.77276900 | 0.44509200  |
| H | 4.88160900  | -2.18936500 | -1.73347000 |
| H | 5.12998100  | -0.95895200 | 1.06295200  |
| H | 5.54929600  | 0.38854100  | -1.65905800 |
| H | 5.68525200  | 1.17739200  | -0.09348300 |

|   |             |             |             |
|---|-------------|-------------|-------------|
| H | 7.62525000  | -0.22124900 | 0.52251800  |
| H | 7.92665400  | 0.61790700  | -0.99585800 |
| H | 6.84680600  | -3.56645800 | -1.12192300 |
| H | 4.60588100  | -3.02313700 | -0.20756400 |
| C | 0.95424700  | -4.32948100 | 1.39082900  |
| C | 0.59815000  | -3.74070700 | 0.01791800  |
| C | 1.70927600  | -2.82101200 | -0.51530000 |
| C | 1.99564200  | -1.69891600 | 0.51157800  |
| C | 2.39339000  | -2.28507500 | 1.88619300  |
| C | 1.28588200  | -3.22269300 | 2.40174100  |
| H | 1.82236900  | -4.99845300 | 1.28682000  |
| H | 0.12875500  | -4.94662400 | 1.76847100  |
| H | -0.33136000 | -3.16045400 | 0.09183900  |
| H | 2.61184100  | -3.41676200 | -0.70021700 |
| H | 1.05860500  | -1.14244000 | 0.64357000  |
| H | 3.33678200  | -2.84432600 | 1.80312900  |
| H | 2.55543700  | -1.49188500 | 2.62357600  |
| H | 0.38717800  | -2.62232400 | 2.59708500  |
| H | 1.59356700  | -3.65811600 | 3.36134300  |
| H | 0.41505400  | -4.54628200 | -0.70509700 |
| H | 1.40165000  | -2.37553200 | -1.46546000 |
| C | 3.31002600  | 3.76251500  | 2.21215800  |
| C | 3.15095500  | 2.46348500  | 3.01466900  |
| C | 3.59960000  | 1.23442200  | 2.20354700  |
| C | 2.81834300  | 1.15729500  | 0.86948600  |
| C | 3.02144400  | 2.45309400  | 0.04576800  |
| C | 2.57851600  | 3.67730900  | 0.86475900  |
| H | 4.37981400  | 3.94903500  | 2.03358500  |
| H | 2.93810200  | 4.61413900  | 2.79565100  |
| H | 2.09748900  | 2.33427700  | 3.29932000  |

|   |            |            |             |
|---|------------|------------|-------------|
| H | 4.67718300 | 1.31217200 | 2.00225900  |
| H | 1.74870700 | 1.08128600 | 1.10653100  |
| H | 4.07868400 | 2.56761400 | -0.22608500 |
| H | 2.45326800 | 2.39110900 | -0.88691000 |
| H | 1.49512600 | 3.61835100 | 1.04037900  |
| H | 3.72688900 | 2.51590100 | 3.94753300  |
| H | 3.45541600 | 0.33162600 | 2.80670800  |
| H | 2.75171500 | 4.58919100 | 0.27936600  |

TS-S8

1 imaginary frequency

H = -5846.002595

G = -5846.135111

Esol = -5846.855843

|    |             |             |            |
|----|-------------|-------------|------------|
| Se | -0.63089600 | 0.95064100  | 0.11014400 |
| N  | 0.13045600  | 1.70440500  | 1.50200800 |
| S  | 0.42868600  | 0.72223300  | 2.83859100 |
| O  | 0.21433000  | -0.72511100 | 2.60676600 |
| O  | -0.16293200 | 1.33891200  | 4.03479400 |
| C  | 2.21922200  | 0.96871700  | 2.96050000 |
| C  | 3.07400000  | 0.21010400  | 2.15550600 |
| C  | 2.71312900  | 1.94380900  | 3.82904900 |
| C  | 4.44291100  | 0.45612300  | 2.19061300 |
| H  | 2.66758600  | -0.54960400 | 1.49753500 |
| C  | 4.08388000  | 2.19079100  | 3.87623800 |
| H  | 2.02149100  | 2.49897700  | 4.45305000 |
| C  | 4.92361600  | 1.45415400  | 3.04122500 |
| H  | 5.13528200  | -0.10235800 | 1.57324100 |
| H  | 4.50435600  | 2.94442500  | 4.53071800 |



|   |             |             |             |
|---|-------------|-------------|-------------|
| N | 6.36202400  | 1.75517500  | 3.03567300  |
| O | 6.79290900  | 2.52934800  | 3.88727700  |
| O | 7.05440900  | 1.22293500  | 2.16233000  |
| I | 2.25921900  | 1.83315600  | -1.86959100 |
| C | 4.34458400  | 1.36054000  | -2.14416900 |
| C | 4.73215000  | 0.66563100  | -3.28791800 |
| C | 5.23531600  | 1.72706400  | -1.13668300 |
| C | 6.08653000  | 0.35312700  | -3.42943200 |
| H | 4.00479200  | 0.35258900  | -4.02757800 |
| C | 6.58392300  | 1.39847600  | -1.29688700 |
| H | 4.89926800  | 2.24237800  | -0.24423800 |
| C | 7.00522100  | 0.71827600  | -2.44179300 |
| H | 6.41714900  | -0.18703500 | -4.31185900 |
| H | 7.28752800  | 1.65886300  | -0.51228700 |
| H | 8.05395400  | 0.46152500  | -2.55961800 |
| N | 1.46864700  | 0.07803500  | -1.03494500 |
| S | 0.98168400  | -1.02184600 | -2.23503600 |
| O | -0.45403800 | -0.88797200 | -2.55353000 |
| O | 1.92852600  | -1.05126800 | -3.36819400 |
| C | 1.21260300  | -2.52958100 | -1.27092400 |
| C | 0.63127000  | -2.66771900 | -0.00584000 |
| C | 1.96096100  | -3.55378900 | -1.85651500 |
| C | 0.81119000  | -3.86158600 | 0.68966400  |
| H | 0.08243600  | -1.85325900 | 0.45522200  |
| C | 2.12313600  | -4.75409700 | -1.16886000 |
| H | 2.40564900  | -3.40553500 | -2.83391900 |
| C | 1.54459500  | -4.88563100 | 0.09211700  |
| H | 0.39705500  | -3.99560400 | 1.68114900  |
| H | 2.68764800  | -5.57741000 | -1.58837300 |
| N | 1.72251200  | -6.15551700 | 0.82171100  |

|   |             |             |             |
|---|-------------|-------------|-------------|
| O | 2.39508100  | -7.03234500 | 0.28070000  |
| O | 1.18603000  | -6.25904900 | 1.92260500  |
| O | -2.85383700 | 1.33036900  | 0.57716600  |
| P | -4.00848100 | 0.46642300  | 0.02474400  |
| C | -7.17169200 | 3.51122500  | 1.73508500  |
| C | -6.95230700 | 2.18471200  | 2.47335000  |
| C | -5.65138500 | 1.49650500  | 2.02935300  |
| C | -5.61235300 | 1.27590500  | 0.49596600  |
| C | -5.84443700 | 2.61334900  | -0.24459100 |
| C | -7.14223500 | 3.29948100  | 0.21627000  |
| H | -6.38069700 | 4.22000900  | 2.01936900  |
| H | -8.12419800 | 3.96407600  | 2.03750900  |
| H | -7.80435900 | 1.51547800  | 2.28108400  |
| H | -4.78859200 | 2.11024400  | 2.31555500  |
| H | -6.41356200 | 0.57669400  | 0.21446300  |
| H | -4.98980100 | 3.27673100  | -0.05869000 |
| H | -5.89192500 | 2.44870200  | -1.32590400 |
| H | -8.00248900 | 2.68111100  | -0.08088500 |
| H | -7.25143400 | 4.25727600  | -0.30791600 |
| H | -6.92280600 | 2.34920800  | 3.55756400  |
| H | -5.54434000 | 0.54406400  | 2.55917700  |
| C | -4.44780800 | -3.54425600 | 2.57924900  |
| C | -3.09345700 | -2.82525400 | 2.50523200  |
| C | -3.23998900 | -1.36113800 | 2.06048200  |
| C | -3.98492500 | -1.27435200 | 0.70719400  |
| C | -5.36343000 | -1.97119200 | 0.80131200  |
| C | -5.20738000 | -3.43560300 | 1.24932800  |
| H | -5.05440700 | -3.09409600 | 3.37908900  |
| H | -4.30843400 | -4.59856500 | 2.84902900  |
| H | -2.44131100 | -3.35334400 | 1.79319800  |

|   |             |             |             |
|---|-------------|-------------|-------------|
| H | -3.79493400 | -0.80442600 | 2.82682800  |
| H | -3.38260100 | -1.82808800 | -0.02996300 |
| H | -5.99143300 | -1.44330600 | 1.53123600  |
| H | -5.89801200 | -1.93584300 | -0.15503900 |
| H | -4.66491500 | -3.99312900 | 0.47170200  |
| H | -6.19831800 | -3.89995300 | 1.33275000  |
| H | -2.58391100 | -2.85802800 | 3.47526700  |
| H | -2.25455600 | -0.89649800 | 1.99070500  |
| C | -4.21611200 | 0.67196800  | -4.73671100 |
| C | -4.72623900 | -0.59357500 | -4.03294400 |
| C | -5.04845000 | -0.33747900 | -2.54893300 |
| C | -3.82992500 | 0.26811200  | -1.81786600 |
| C | -3.34128600 | 1.55713400  | -2.52138900 |
| C | -3.01194200 | 1.27221600  | -3.99633400 |
| H | -5.02650400 | 1.41543700  | -4.77915000 |
| H | -3.94925700 | 0.44132400  | -5.77568200 |
| H | -3.95944300 | -1.37825500 | -4.09911200 |
| H | -5.90349900 | 0.34967400  | -2.47707100 |
| H | -3.00191400 | -0.45487500 | -1.89039000 |
| H | -4.11427700 | 2.33369100  | -2.46929000 |
| H | -2.46219300 | 1.95158300  | -2.00331600 |
| H | -2.16268900 | 0.57787100  | -4.04414500 |
| H | -5.61914200 | -0.98180900 | -4.53939100 |
| H | -5.35943700 | -1.27850700 | -2.08138300 |
| H | -2.69223800 | 2.20178400  | -4.48497700 |

TS-S9

1 imaginary frequency

H = -5760.199046

G = -5760.326222

Esol = -5761.067230

|    |             |             |             |
|----|-------------|-------------|-------------|
| Se | 0.15549900  | -2.02791000 | -0.77619200 |
| N  | 0.18795000  | -2.47065300 | 0.91881700  |
| N  | 1.83987400  | -1.60083000 | -1.34032100 |
| S  | 1.52875800  | -2.83998800 | 1.78948600  |
| O  | 2.49673100  | -3.67982500 | 1.05113400  |
| O  | 1.03642200  | -3.32320000 | 3.08525400  |
| S  | 1.77384900  | -0.80582700 | -2.84546500 |
| O  | 0.42868800  | -0.99377900 | -3.43461900 |
| O  | 2.95636500  | -1.22730700 | -3.60285000 |
| C  | 0.07582900  | -4.02828400 | -1.79285200 |
| C  | 1.36038900  | -4.55328000 | -1.51561900 |
| C  | 2.51705000  | -4.10441000 | -2.18811600 |
| H  | 1.49232800  | -5.08699100 | -0.57776800 |
| H  | 2.37419700  | -3.81361800 | -3.23296800 |
| H  | 2.42243500  | -2.91854100 | -1.68172500 |
| H  | -0.77422800 | -4.45686300 | -1.26691500 |
| H  | -0.13657000 | -3.66350900 | -2.79700200 |
| C  | 3.88622700  | -4.67142100 | -1.86212000 |
| H  | 4.66920100  | -3.97554200 | -2.17765500 |
| H  | 3.98866200  | -4.84352900 | -0.78761300 |
| H  | 4.05184600  | -5.61795800 | -2.39121000 |
| C  | 1.96945900  | 0.93943700  | -2.45350700 |
| C  | 1.05763000  | 1.55791900  | -1.59576200 |
| C  | 2.98889700  | 1.64650500  | -3.09268000 |
| C  | 1.15989000  | 2.93066800  | -1.39393100 |
| H  | 0.27703500  | 0.99935300  | -1.08621900 |
| C  | 3.09388900  | 3.02048600  | -2.88221600 |
| H  | 3.68176700  | 1.12603500  | -3.74388400 |

|   |             |             |             |
|---|-------------|-------------|-------------|
| C | 2.17097500  | 3.63775900  | -2.04206600 |
| H | 0.47099100  | 3.45609700  | -0.74483100 |
| H | 3.86717900  | 3.61036400  | -3.35822900 |
| N | 2.25858100  | 5.09663000  | -1.83576700 |
| O | 3.17588200  | 5.69581300  | -2.39234600 |
| O | 1.40279300  | 5.62247300  | -1.12532800 |
| C | 2.36336500  | -1.26672500 | 2.08373500  |
| C | 3.65393200  | -1.30990100 | 2.62044000  |
| C | 1.71929300  | -0.05601300 | 1.82626200  |
| C | 4.30920600  | -0.12164700 | 2.92462400  |
| H | 4.14161700  | -2.26395700 | 2.78949800  |
| C | 2.37047700  | 1.13601300  | 2.13791000  |
| H | 0.71945000  | -0.03707700 | 1.40482800  |
| C | 3.65180700  | 1.08391800  | 2.68039900  |
| H | 5.30881600  | -0.11330400 | 3.34080700  |
| H | 1.90425300  | 2.09697200  | 1.96042500  |
| N | 4.33912700  | 2.34611100  | 3.00211800  |
| O | 3.74100300  | 3.39703700  | 2.77228500  |
| O | 5.47015600  | 2.27496300  | 3.48130000  |
| P | -2.75445000 | 0.54178300  | 0.44596900  |
| C | -2.49911300 | 5.22881100  | 1.22472100  |
| C | -2.07576300 | 4.25521300  | 2.33152500  |
| C | -1.84061800 | 2.83904500  | 1.78245500  |
| C | -3.08645400 | 2.29228000  | 1.04101300  |
| C | -3.49796700 | 3.27931600  | -0.07654300 |
| C | -3.72579300 | 4.69859700  | 0.47247600  |
| H | -1.66597000 | 5.36328900  | 0.51946800  |
| H | -2.71147100 | 6.21867000  | 1.64680400  |
| H | -2.85577400 | 4.21994300  | 3.10664200  |
| H | -0.99878100 | 2.85188900  | 1.07895800  |

|   |             |             |             |
|---|-------------|-------------|-------------|
| H | -3.91891100 | 2.22363200  | 1.75790500  |
| H | -2.70748000 | 3.31303900  | -0.84035700 |
| H | -4.41002200 | 2.94237100  | -0.58079400 |
| H | -4.59143700 | 4.68404700  | 1.15133400  |
| H | -3.98989800 | 5.36984500  | -0.35428200 |
| H | -1.16260100 | 4.61050700  | 2.82458000  |
| H | -1.54266300 | 2.16979600  | 2.59459900  |
| C | -2.96817300 | -2.78445900 | 3.77444800  |
| C | -3.77384600 | -3.02175700 | 2.49228700  |
| C | -3.34698300 | -2.07194400 | 1.35993100  |
| C | -3.40767300 | -0.58355600 | 1.78108500  |
| C | -2.64706900 | -0.35445100 | 3.11061400  |
| C | -3.09648800 | -1.32278300 | 4.21702300  |
| H | -1.91097100 | -3.02307900 | 3.59639000  |
| H | -3.31743500 | -3.45422000 | 4.57026600  |
| H | -4.84481400 | -2.87819500 | 2.70228200  |
| H | -2.32209700 | -2.31164100 | 1.05538700  |
| H | -4.46219700 | -0.30152400 | 1.92889200  |
| H | -1.57345800 | -0.48915600 | 2.93065800  |
| H | -2.79180800 | 0.67533400  | 3.45594200  |
| H | -4.14259100 | -1.11033700 | 4.48551700  |
| H | -2.49826300 | -1.13929600 | 5.11798200  |
| H | -3.65896600 | -4.05866000 | 2.15204700  |
| H | -3.99485300 | -2.24240400 | 0.49322000  |
| C | -5.51334100 | -0.96856900 | -3.14075700 |
| C | -3.99075200 | -0.89448200 | -3.33003700 |
| C | -3.24978700 | -0.88103000 | -1.98296100 |
| C | -3.75677000 | 0.28668800  | -1.10359600 |
| C | -5.28365000 | 0.19395000  | -0.88864500 |
| C | -6.02438300 | 0.16359900  | -2.23736900 |

|   |             |             |             |
|---|-------------|-------------|-------------|
| H | -5.77524100 | -1.93674100 | -2.68847300 |
| H | -6.01997300 | -0.93230200 | -4.11311100 |
| H | -3.73524800 | 0.01612300  | -3.89090400 |
| H | -3.42243000 | -1.83733900 | -1.47323700 |
| H | -3.55803100 | 1.20389600  | -1.67633900 |
| H | -5.52203400 | -0.71970100 | -0.32771600 |
| H | -5.64919100 | 1.03378300  | -0.28387400 |
| H | -5.88199600 | 1.12803800  | -2.74652200 |
| H | -7.10283900 | 0.05794400  | -2.06520400 |
| H | -3.64049500 | -1.73905800 | -3.93636400 |
| H | -2.17157400 | -0.79817600 | -2.14289800 |
| O | -1.26807700 | 0.33073100  | 0.16409100  |

TS1

1 imaginary frequency

H = -1740.781874

G = -1740.868435

Esol = -1741.135578

|   |             |            |             |
|---|-------------|------------|-------------|
| C | 4.77388000  | 1.45538700 | -0.28760600 |
| O | 3.83361500  | 1.26762900 | 0.66518400  |
| O | 4.67474800  | 1.09211300 | -1.43893600 |
| C | 5.96350700  | 2.18640600 | 0.30171900  |
| H | 6.29592200  | 1.69882000 | 1.22224100  |
| H | 6.76969000  | 2.20600200 | -0.43282300 |
| H | 5.66621500  | 3.20892900 | 0.55611300  |
| I | 2.01600800  | 0.50238700 | 0.01371300  |
| O | -0.94809700 | 2.37647000 | -0.23318400 |
| C | -0.02930300 | 3.23248000 | 0.00355700  |
| O | 1.20817700  | 3.00687400 | 0.04301900  |

|   |             |             |             |
|---|-------------|-------------|-------------|
| C | -0.50212800 | 4.66023100  | 0.26030900  |
| H | -1.13286400 | 4.99619700  | -0.56947900 |
| H | -1.11985900 | 4.68118500  | 1.16546000  |
| H | 0.34499300  | 5.33740800  | 0.38295700  |
| C | 2.73599800  | -1.52631100 | 0.02561300  |
| C | 2.32849500  | -2.37191300 | 1.05851100  |
| C | 3.57474900  | -1.96347400 | -1.00183100 |
| C | 2.77615200  | -3.69481200 | 1.05654700  |
| H | 1.65846100  | -2.01949800 | 1.83562900  |
| C | 4.02108900  | -3.28590100 | -0.98218700 |
| H | 3.89031600  | -1.28282500 | -1.78466800 |
| C | 3.62159500  | -4.14815000 | 0.04227000  |
| H | 2.46055800  | -4.36728100 | 1.84882100  |
| H | 4.67927100  | -3.64063200 | -1.77031300 |
| H | 3.96872500  | -5.17759300 | 0.04796000  |
| N | -0.41412400 | -0.12611700 | -0.72029000 |
| S | -1.26850100 | -1.21302200 | 0.27029600  |
| O | -1.08569300 | -2.55138200 | -0.29486000 |
| O | -0.85395000 | -0.90380700 | 1.63950500  |
| C | -3.00507800 | -0.76739500 | 0.08155200  |
| C | -3.90014700 | -1.78723600 | -0.25118400 |
| C | -3.42759800 | 0.54545200  | 0.31919500  |
| C | -5.25874100 | -1.49353900 | -0.34534800 |
| H | -3.53217900 | -2.79077100 | -0.43215500 |
| C | -4.78563800 | 0.83785300  | 0.21571500  |
| H | -2.71456300 | 1.33623400  | 0.53636400  |
| C | -5.67495500 | -0.18570500 | -0.10841600 |
| H | -5.98847600 | -2.25253100 | -0.59794900 |
| H | -5.15911700 | 1.84078800  | 0.38028000  |
| N | -7.11402900 | 0.12877200  | -0.21235500 |



|   |             |             |             |
|---|-------------|-------------|-------------|
| O | -7.45846200 | 1.28855400  | 0.00339200  |
| O | -7.87529600 | -0.79027900 | -0.50818700 |
| H | -0.67031500 | 0.93846400  | -0.54888400 |
| H | -0.50372200 | -0.39926900 | -1.70054100 |

TS10

1 imaginary frequency

H = -7139.583524

G = -7139.681706

Esol = -7139.949654

|    |             |             |             |
|----|-------------|-------------|-------------|
| Se | -0.47221300 | -1.11953500 | -0.76816700 |
| N  | -0.79103700 | 0.37876200  | 0.20207200  |
| N  | -0.23380300 | -2.14771400 | 0.68107100  |
| S  | -0.59834200 | 1.78750800  | -0.69180300 |
| O  | -1.34570200 | 2.81301000  | 0.02518400  |
| O  | -0.78529100 | 1.54869500  | -2.11937800 |
| S  | 0.13972300  | -3.67535400 | 0.23362100  |
| O  | -0.54105100 | -4.07738700 | -1.00464100 |
| O  | 0.09740400  | -4.50774100 | 1.42811200  |
| C  | -5.57207700 | 0.23000900  | 1.82391100  |
| C  | -4.06649200 | 0.11560400  | 1.85950900  |
| C  | -3.47964000 | -0.05282000 | 0.45984300  |
| C  | -4.04565500 | 1.02838200  | -0.47069100 |
| C  | -5.57729400 | 0.94567200  | -0.51990000 |
| C  | -6.28640400 | 0.58130700  | 0.73815100  |
| H  | -3.64919400 | 1.03208500  | 2.30536700  |
| H  | -6.09351800 | 0.01663400  | 2.75653600  |
| H  | -3.76703100 | -0.69551600 | 2.52911400  |
| C  | -7.78861100 | 0.65721700  | 0.70922100  |

|    |             |             |             |
|----|-------------|-------------|-------------|
| H  | -8.19485800 | -0.01205900 | -0.05734100 |
| H  | -8.21888300 | 0.38584100  | 1.67757700  |
| H  | -8.12247200 | 1.66666000  | 0.44399100  |
| O  | -6.18009100 | 1.22048700  | -1.54330700 |
| C  | -3.22201200 | -1.36480900 | -0.04092800 |
| C  | -3.31479200 | -2.57604300 | 0.83492300  |
| C  | -2.54609400 | -1.51046100 | -1.30230700 |
| H  | -4.28025900 | -2.61471300 | 1.34951000  |
| H  | -2.51764600 | -2.55414500 | 1.59320900  |
| H  | -3.67452300 | 0.98747500  | -1.49573100 |
| H  | -3.77495700 | 2.01695600  | -0.07892700 |
| H  | -3.17512900 | -3.49328800 | 0.25972600  |
| O  | 1.73411400  | -3.59722500 | -0.27237300 |
| C  | 2.68921200  | -3.26474000 | 0.73000200  |
| H  | 3.26177000  | -4.15689200 | 0.99853500  |
| H  | 2.21521700  | -2.85279100 | 1.62471600  |
| C  | 3.66507700  | -2.21488900 | 0.17865400  |
| Cl | 2.79706400  | -0.68556200 | -0.22846500 |
| Cl | 4.50008700  | -2.82766300 | -1.28261000 |
| Cl | 4.87308700  | -1.88079100 | 1.47510000  |
| O  | 1.00889300  | 2.09375800  | -0.54686000 |
| C  | 1.48354300  | 2.70115500  | 0.66423900  |
| H  | 0.65158800  | 3.06906400  | 1.26722400  |
| H  | 2.06378800  | 1.96057600  | 1.21877200  |
| C  | 2.39451000  | 3.88783900  | 0.31511800  |
| Cl | 2.98754200  | 4.54326900  | 1.89082700  |
| Cl | 1.48131000  | 5.15293900  | -0.56304800 |
| Cl | 3.78849100  | 3.34444500  | -0.67294800 |
| H  | -2.20303800 | 0.22969500  | 0.50666400  |
| H  | -2.45583200 | -2.51615300 | -1.70614000 |

|   |             |             |             |
|---|-------------|-------------|-------------|
| H | -2.67269900 | -0.73914700 | -2.05908800 |
|---|-------------|-------------|-------------|

TS11

l imaginary frequency

H = -7139.583811

G = -7139.681453

Esol = -7139.950578

|    |             |             |             |
|----|-------------|-------------|-------------|
| Se | -0.87354000 | -0.06665400 | 0.55992500  |
| N  | -0.17664500 | -0.18067700 | -1.08433700 |
| N  | -1.91820500 | -1.53432800 | 0.36695300  |
| S  | 0.45237300  | 1.23700000  | -1.56055200 |
| O  | -0.37378800 | 2.40901500  | -1.24122600 |
| O  | 1.01624500  | 1.08160500  | -2.89266500 |
| S  | -3.04386700 | -1.65722100 | 1.60743600  |
| O  | -2.50451600 | -1.16572700 | 2.87361100  |
| O  | -3.62863800 | -2.98315900 | 1.48728200  |
| C  | 3.16530300  | -3.09079600 | -2.05599800 |
| C  | 1.91494300  | -3.08423900 | -1.21716900 |
| C  | 2.07865300  | -2.18402300 | 0.01520900  |
| C  | 3.39426700  | -2.55114500 | 0.75388000  |
| C  | 4.59926500  | -2.42939400 | -0.18310800 |
| C  | 4.39827100  | -2.77614800 | -1.61240600 |
| H  | 3.03796100  | -3.37112300 | -3.10082800 |
| H  | 1.06822300  | -2.73302200 | -1.81740800 |
| H  | 2.18756600  | -1.15340100 | -0.33903400 |
| H  | 3.58112000  | -1.91204200 | 1.62101400  |
| H  | 1.68460900  | -4.12103100 | -0.92579200 |
| H  | 3.34180200  | -3.58954500 | 1.11331100  |
| C  | 5.62130300  | -2.75356000 | -2.48904900 |

|    |             |             |             |
|----|-------------|-------------|-------------|
| H  | 5.37692800  | -3.03939900 | -3.51613900 |
| H  | 6.07017000  | -1.75414400 | -2.50060600 |
| H  | 6.39057200  | -3.43310200 | -2.10515400 |
| O  | 5.68782200  | -2.08968400 | 0.25509400  |
| C  | 0.95467100  | -2.20363800 | 1.01243900  |
| C  | 0.01938700  | -3.25420400 | 1.12924500  |
| H  | 1.44033100  | -0.21363400 | 1.73275000  |
| H  | 0.20110000  | -4.18314200 | 0.59462100  |
| H  | -0.45049900 | -3.39090500 | 2.10581200  |
| C  | 0.67614100  | -0.98896800 | 1.74023000  |
| H  | 0.14526100  | -1.08494800 | 2.68740800  |
| H  | -0.95917800 | -2.63615300 | 0.56828600  |
| O  | -4.15436900 | -0.52291300 | 1.19731400  |
| C  | -4.87315900 | -0.72100700 | -0.03116900 |
| H  | -4.34468700 | -1.40923000 | -0.69434200 |
| H  | -5.86824900 | -1.10821600 | 0.19777700  |
| C  | -5.01084800 | 0.63195000  | -0.74149300 |
| Cl | -3.40086200 | 1.29718700  | -1.16309100 |
| Cl | -5.95569900 | 0.32248000  | -2.24659000 |
| Cl | -5.89761100 | 1.79610800  | 0.29769500  |
| O  | 1.75447500  | 1.32374400  | -0.46217200 |
| C  | 2.53409100  | 2.51249300  | -0.55832800 |
| H  | 1.89120500  | 3.39783100  | -0.53440100 |
| H  | 3.13093500  | 2.50737300  | -1.47607300 |
| C  | 3.48830800  | 2.57353800  | 0.63867500  |
| Cl | 4.58786000  | 1.15373400  | 0.65608800  |
| Cl | 2.55344200  | 2.62389900  | 2.18287500  |
| Cl | 4.45179000  | 4.08391100  | 0.47768600  |

TS12

1 imaginary frequency

H = -5066.620240

G = -5066.724149

Esol = -5067.234696

|    |             |             |             |
|----|-------------|-------------|-------------|
| Se | 0.57744500  | -1.21810300 | -1.14426100 |
| N  | -0.74249200 | -2.25397300 | -1.67936000 |
| N  | 0.14000100  | -0.42137900 | 0.41929000  |
| S  | -1.57982600 | -3.24471300 | -0.64616800 |
| O  | -0.79084600 | -3.55239800 | 0.56994100  |
| O  | -2.10107300 | -4.34180300 | -1.46388600 |
| S  | 0.41673900  | 1.23745400  | 0.43564900  |
| O  | 1.24528200  | 1.64137000  | -0.71708600 |
| O  | 0.84774800  | 1.59137200  | 1.79224600  |
| C  | -1.22597600 | 1.92863100  | 0.16761000  |
| C  | -2.04576700 | 1.40089600  | -0.83316400 |
| C  | -1.60101500 | 3.04668900  | 0.91311400  |
| C  | -3.26241900 | 2.01598000  | -1.10723400 |
| H  | -1.74956100 | 0.50986800  | -1.37518100 |
| C  | -2.82020500 | 3.66476900  | 0.64111100  |
| H  | -0.94841400 | 3.42072200  | 1.69411100  |
| C  | -3.62415200 | 3.14154400  | -0.36794600 |
| H  | -3.92845700 | 1.63964800  | -1.87334900 |
| H  | -3.15131100 | 4.53573600  | 1.19280700  |
| N  | -4.90941700 | 3.80364900  | -0.66807100 |
| O  | -5.60650500 | 3.31132600  | -1.55276100 |
| O  | -5.19614900 | 4.80641300  | -0.01820800 |
| C  | -3.02139800 | -2.31565500 | -0.08665400 |
| C  | -4.15328500 | -2.28124800 | -0.90642300 |
| C  | -3.00114900 | -1.68383300 | 1.15773500  |

|   |             |             |             |
|---|-------------|-------------|-------------|
| C | -5.28459700 | -1.59170800 | -0.47905500 |
| H | -4.15035300 | -2.80795100 | -1.85433400 |
| C | -4.13131500 | -0.99453200 | 1.59064800  |
| H | -2.11321700 | -1.73714100 | 1.77532400  |
| C | -5.25179400 | -0.95992400 | 0.76355000  |
| H | -6.18463900 | -1.54647800 | -1.07962200 |
| H | -4.15914200 | -0.49499100 | 2.55098500  |
| N | -6.45244500 | -0.23756700 | 1.22543600  |
| O | -6.38133200 | 0.35231800  | 2.30279800  |
| O | -7.44796600 | -0.26975400 | 0.50528600  |
| C | 3.98823800  | -1.55831500 | 0.70477900  |
| C | 3.93324900  | -0.18915200 | -0.03670000 |
| C | 5.33614000  | 0.40444300  | -0.36837900 |
| C | 6.18205600  | 0.39723800  | 0.91393000  |
| C | 6.18718700  | -0.88981200 | 1.71561900  |
| C | 4.76659000  | -1.39620300 | 2.01755000  |
| H | 3.35154100  | -0.27994400 | -0.96021300 |
| C | 5.12261800  | 1.87603600  | -0.86700000 |
| C | 6.88219000  | 1.45951500  | 1.33373700  |
| H | 6.72614700  | -1.67903500 | 1.16892700  |
| H | 4.25873100  | -0.66991900 | 2.66463600  |
| C | 6.97500700  | 2.77476700  | 0.61171000  |
| C | 6.43664200  | 2.67411500  | -0.81806200 |
| H | 7.43541900  | 1.37948800  | 2.27036800  |
| H | 6.41444400  | 3.53822100  | 1.17448900  |
| H | 7.18720800  | 2.19796300  | -1.46340700 |
| H | 4.80836800  | -2.34782800 | 2.56214400  |
| H | 8.01746500  | 3.12237800  | 0.60833300  |
| H | 6.26950600  | 3.67683100  | -1.23026900 |
| H | 4.43814800  | 2.34501800  | -0.14509600 |

|   |            |             |             |
|---|------------|-------------|-------------|
| H | 3.39556200 | 0.51733400  | 0.60470200  |
| C | 4.46544300 | 1.99331300  | -2.25081800 |
| H | 4.26802800 | 3.04816600  | -2.47245800 |
| H | 5.11353100 | 1.60969100  | -3.04738000 |
| H | 3.50365600 | 1.47493800  | -2.30267400 |
| C | 6.02739800 | -0.46099600 | -1.45108600 |
| H | 4.53766000 | -2.26078900 | 0.06090300  |
| C | 2.60282100 | -2.13207100 | 0.84094600  |
| C | 1.77686500 | -1.93328800 | 1.97408400  |
| H | 0.98368400 | -2.67033100 | 2.11984900  |
| H | 2.22731700 | -1.55455400 | 2.88781300  |
| C | 1.97170800 | -2.69100500 | -0.32419100 |
| H | 2.60681700 | -2.88111000 | -1.18833700 |
| H | 6.95253700 | 0.00998700  | -1.79719300 |
| H | 6.29993700 | -1.45218500 | -1.07467500 |
| H | 5.37651000 | -0.60617900 | -2.32048200 |
| H | 6.73473500 | -0.73976900 | 2.65247000  |
| H | 1.22604900 | -3.46016300 | -0.12792300 |
| H | 1.03907700 | -1.05300900 | 1.47373300  |

TS13

1 imaginary frequency

H = -5066.617721

G = -5066.723203

Esol = -5067.232005

|    |             |             |            |
|----|-------------|-------------|------------|
| Se | 0.19196600  | -1.38074700 | 2.01250800 |
| N  | 0.47465400  | 0.33803800  | 2.41331300 |
| N  | 0.30622100  | -1.32167800 | 0.20288500 |
| S  | -0.94202500 | 1.03967100  | 2.88836800 |

|   |             |             |             |
|---|-------------|-------------|-------------|
| O | -0.75998900 | 1.77105500  | 4.14509700  |
| O | -2.04017800 | 0.03357400  | 2.80695600  |
| S | -0.31938800 | -2.71627300 | -0.52974500 |
| O | -0.33542900 | -3.82941000 | 0.44600200  |
| O | 0.39986500  | -2.89171500 | -1.79806700 |
| C | -2.02607900 | -2.27967200 | -0.91297000 |
| C | -2.85071000 | -1.72279700 | 0.06840700  |
| C | -2.49827200 | -2.58503800 | -2.19083900 |
| C | -4.18614200 | -1.47589000 | -0.23570500 |
| H | -2.47271200 | -1.45797400 | 1.04933400  |
| C | -3.83519200 | -2.33798100 | -2.49476200 |
| H | -1.82608100 | -3.00302300 | -2.93152400 |
| C | -4.65399300 | -1.79135300 | -1.50999200 |
| H | -4.85557800 | -1.03981000 | 0.49507600  |
| H | -4.24508700 | -2.55899100 | -3.47232000 |
| N | -6.07171600 | -1.53023400 | -1.83192600 |
| O | -6.45768400 | -1.81504900 | -2.96392700 |
| O | -6.77415400 | -1.04682400 | -0.94728000 |
| C | -1.27526500 | 2.28275700  | 1.62115800  |
| C | -1.71010200 | 3.54694000  | 2.02132400  |
| C | -1.15468400 | 1.94310800  | 0.27138200  |
| C | -2.03677100 | 4.49411800  | 1.05263300  |
| H | -1.77993900 | 3.78074000  | 3.07765000  |
| C | -1.48092600 | 2.88476300  | -0.69935500 |
| H | -0.78877200 | 0.96245400  | -0.01338800 |
| C | -1.91754500 | 4.14473200  | -0.29036700 |
| H | -2.37545500 | 5.48719000  | 1.32048500  |
| H | -1.39739400 | 2.66432000  | -1.75623400 |
| N | -2.25645200 | 5.14576300  | -1.31837600 |
| O | -2.13641900 | 4.81448300  | -2.49726300 |



|   |             |             |             |
|---|-------------|-------------|-------------|
| O | -2.63714100 | 6.25065600  | -0.93524200 |
| C | 3.08953100  | -1.66475000 | 0.18998000  |
| C | 3.50711100  | -0.18205000 | 0.37170600  |
| C | 3.63103700  | 0.68523200  | -0.92083300 |
| C | 4.32780700  | -0.12538100 | -2.01762000 |
| C | 3.76891400  | -1.50755700 | -2.26288700 |
| C | 3.76052800  | -2.36948700 | -0.99186400 |
| H | 2.80980300  | 0.31420700  | 1.04944800  |
| C | 4.48885100  | 1.94429000  | -0.54846200 |
| C | 5.35710500  | 0.34065200  | -2.73764000 |
| H | 2.73954400  | -1.44843700 | -2.64062100 |
| H | 4.79847100  | -2.59960700 | -0.70745300 |
| C | 5.94563500  | 1.71905200  | -2.60777000 |
| C | 5.02925000  | 2.64659800  | -1.80463800 |
| H | 5.80201800  | -0.31102500 | -3.49067300 |
| H | 6.93545200  | 1.65471400  | -2.12746000 |
| H | 4.19213900  | 2.97535600  | -2.43464300 |
| H | 3.26177200  | -3.31943300 | -1.20445100 |
| H | 6.13375300  | 2.13566900  | -3.60684900 |
| H | 5.57023800  | 3.55520500  | -1.51215300 |
| H | 5.36730500  | 1.56370200  | -0.00357600 |
| H | 4.48909400  | -0.20074400 | 0.86421300  |
| C | 3.77718300  | 2.94823800  | 0.37279800  |
| H | 3.32901300  | 2.47541600  | 1.25327300  |
| H | 4.49407500  | 3.69604200  | 0.73079700  |
| H | 2.98222800  | 3.48719000  | -0.15444500 |
| C | 2.22240700  | 1.09747900  | -1.41505500 |
| C | 2.85716400  | -2.44363000 | 1.36983600  |
| C | 2.92900400  | -3.94035400 | 1.33168300  |
| H | 2.11091800  | -4.34181000 | 0.71572900  |

|   |            |             |             |
|---|------------|-------------|-------------|
| H | 3.86920800 | -4.27929400 | 0.88528700  |
| H | 2.82934600 | -4.37082700 | 2.33077100  |
| C | 2.26274100 | -1.83615000 | 2.52491500  |
| H | 2.13834100 | -2.47765000 | 3.39511300  |
| H | 2.52765200 | -0.81303000 | 2.77623200  |
| H | 1.62747100 | 0.23145700  | -1.71630000 |
| H | 1.66379600 | 1.61151400  | -0.62780000 |
| H | 2.29566800 | 1.76440500  | -2.28018400 |
| H | 4.35316400 | -2.01741900 | -3.03676600 |
| H | 1.86492100 | -1.56209200 | -0.03165200 |

TS14

1 imaginary frequency

H = -4716.491952

G = -4716.584205

Esol = -4716.904424

|    |             |             |             |
|----|-------------|-------------|-------------|
| Se | -1.94802500 | -0.37554200 | -1.08771200 |
| N  | -1.97747800 | 1.30346300  | -1.59909800 |
| N  | -1.23379100 | -0.48249000 | 0.57700500  |
| S  | -1.73297600 | 2.56371600  | -0.54262000 |
| O  | -2.49742100 | 2.40175600  | 0.70948500  |
| O  | -1.89791300 | 3.78287600  | -1.33560200 |
| S  | -0.58930200 | -2.04598900 | 0.83488600  |
| O  | -1.27353300 | -3.00763700 | -0.05411200 |
| O  | -0.57735000 | -2.25394000 | 2.28362400  |
| C  | 1.11225600  | -1.88233800 | 0.27097500  |
| C  | 2.13124700  | -1.81283400 | 1.22126200  |
| C  | 1.37840600  | -1.86526200 | -1.10080600 |
| C  | 3.45411300  | -1.71883100 | 0.79009900  |

|   |             |             |             |
|---|-------------|-------------|-------------|
| H | 1.88790400  | -1.84067100 | 2.27740500  |
| C | 2.69721300  | -1.76755000 | -1.53233100 |
| H | 0.56999900  | -1.92783000 | -1.82140500 |
| C | 3.71047000  | -1.69433400 | -0.57752300 |
| H | 4.27858900  | -1.66424000 | 1.49024900  |
| H | 2.95216600  | -1.75196400 | -2.58466000 |
| N | 5.11146900  | -1.59758700 | -1.03862100 |
| O | 5.29826300  | -1.47708000 | -2.24782800 |
| O | 5.99209100  | -1.65317800 | -0.18658200 |
| C | 0.00978200  | 2.41711800  | -0.09372300 |
| C | 0.94527600  | 2.08031800  | -1.07448500 |
| C | 0.39066100  | 2.66423500  | 1.22506000  |
| C | 2.28667900  | 1.96177900  | -0.72586100 |
| H | 0.62310400  | 1.90128100  | -2.09476500 |
| C | 1.73370000  | 2.56008300  | 1.57811400  |
| H | -0.36283900 | 2.90845600  | 1.96506400  |
| C | 2.65516200  | 2.19536000  | 0.59875100  |
| H | 3.04173300  | 1.68799500  | -1.45212100 |
| H | 2.07032700  | 2.73598000  | 2.59232100  |
| N | 4.06584800  | 2.02018900  | 0.98244400  |
| O | 4.39708900  | 2.36295800  | 2.11566900  |
| O | 4.82567800  | 1.52590100  | 0.14834200  |
| C | -4.09430400 | -1.25693000 | 0.75615900  |
| C | -4.38513800 | -0.77159900 | -0.53373600 |
| H | -3.99471300 | -2.34121900 | 0.83808800  |
| C | -4.72141100 | -1.78929400 | -1.60742200 |
| H | -4.17408900 | -2.72626700 | -1.46744500 |
| H | -5.79646700 | -2.01416100 | -1.58536000 |
| H | -4.50035400 | -1.40124300 | -2.60736800 |
| C | -4.91101300 | 0.62273400  | -0.76897000 |

|   |             |             |             |
|---|-------------|-------------|-------------|
| H | -6.00909900 | 0.58141300  | -0.75001700 |
| H | -4.57750600 | 1.34243700  | -0.02109700 |
| H | -4.61480700 | 1.00250100  | -1.75143400 |
| C | -3.62318000 | -0.51818200 | 1.86722300  |
| H | -3.80174500 | 0.55936400  | 1.85087300  |
| C | -3.59387600 | -1.14672100 | 3.25005600  |
| H | -3.32689400 | -2.20676300 | 3.20672500  |
| H | -2.86323900 | -0.64417300 | 3.88958100  |
| H | -4.57683400 | -1.05574500 | 3.72908700  |
| H | -2.38976300 | -0.48511600 | 1.42912200  |

TS15

1 imaginary frequency

H = -4716.496995

G = -4716.588575

Esol = -4716.909762

|    |             |             |             |
|----|-------------|-------------|-------------|
| Se | -1.95534600 | -0.50719200 | -0.74458000 |
| N  | -2.15571000 | 1.13429700  | -1.35089700 |
| N  | -1.16655900 | -0.48517300 | 0.90109200  |
| S  | -1.81291900 | 2.45405000  | -0.40865300 |
| O  | -2.37580400 | 2.34704900  | 0.95090700  |
| O  | -2.13660500 | 3.62220100  | -1.23062600 |
| S  | -0.48101000 | -2.01076100 | 1.23366500  |
| O  | -1.17359700 | -3.03955100 | 0.42891400  |
| O  | -0.42428100 | -2.12133200 | 2.69124000  |
| C  | 1.19810400  | -1.87032500 | 0.60233800  |
| C  | 2.24505800  | -1.67837600 | 1.50386100  |
| C  | 1.41937400  | -1.98741900 | -0.77265400 |
| C  | 3.55030500  | -1.60006300 | 1.01911200  |

|   |             |             |             |
|---|-------------|-------------|-------------|
| H | 2.03750100  | -1.60441100 | 2.56549300  |
| C | 2.72066000  | -1.90745600 | -1.25789200 |
| H | 0.58938900  | -2.14646600 | -1.45281000 |
| C | 3.76230600  | -1.71388900 | -0.35184100 |
| H | 4.39534100  | -1.45715400 | 1.68129800  |
| H | 2.94170600  | -1.99879200 | -2.31401900 |
| N | 5.14618400  | -1.64708000 | -0.86789400 |
| O | 5.29508400  | -1.69658200 | -2.08680300 |
| O | 6.05193300  | -1.55924400 | -0.04506800 |
| C | -0.01878300 | 2.38256600  | -0.20346600 |
| C | 0.53213900  | 2.79766400  | 1.00945900  |
| C | 0.78458100  | 1.93172500  | -1.25307400 |
| C | 1.91271700  | 2.75263700  | 1.18418000  |
| H | -0.11970400 | 3.12334900  | 1.81201600  |
| C | 2.16410200  | 1.87343000  | -1.08148000 |
| H | 0.33085000  | 1.62116100  | -2.18813500 |
| C | 2.70288300  | 2.27758100  | 0.13946600  |
| H | 2.37856200  | 3.05777600  | 2.11303000  |
| H | 2.82131200  | 1.51821000  | -1.86538400 |
| N | 4.15742300  | 2.17116900  | 0.34156800  |
| O | 4.81221600  | 1.59504600  | -0.52832000 |
| O | 4.62840500  | 2.65115000  | 1.37064000  |
| C | -4.00065400 | -1.15435600 | -0.05630300 |
| C | -4.19721500 | -0.28492400 | 1.07173400  |
| H | -3.67653200 | -2.16591700 | 0.19741100  |
| C | -3.47514500 | -0.55311600 | 2.25329800  |
| H | -3.62702900 | 0.10869500  | 3.10349800  |
| H | -3.30257000 | -1.59714600 | 2.52022500  |
| C | -5.01793200 | 0.95830000  | 0.91885800  |
| H | -4.79879300 | 1.48481500  | -0.01347500 |

|   |             |             |             |
|---|-------------|-------------|-------------|
| H | -6.07933800 | 0.66849300  | 0.88743100  |
| H | -4.86599000 | 1.64705800  | 1.74976500  |
| C | -4.86735200 | -1.05939300 | -1.30258900 |
| H | -5.91934000 | -1.14558500 | -0.99621800 |
| C | -4.54719000 | -2.14594700 | -2.33595900 |
| H | -5.16469800 | -2.02354400 | -3.23057400 |
| H | -3.49671800 | -2.10606700 | -2.64610000 |
| H | -4.73265800 | -3.14651000 | -1.92950500 |
| H | -4.76248500 | -0.06467300 | -1.75306700 |
| H | -2.26007100 | -0.33558700 | 1.77818700  |

TS16

1 imaginary frequency

H = -4716.511222

G = -4716.604277

Esol = -4716.928633

|    |             |             |             |
|----|-------------|-------------|-------------|
| Se | -2.03729300 | -0.48369500 | -0.70654700 |
| N  | -1.12211200 | 0.86374500  | -1.62665100 |
| N  | -1.13911000 | -0.56816200 | 0.85159400  |
| S  | -1.00595100 | 2.49601000  | -1.22707200 |
| O  | -2.03574100 | 2.73528600  | -0.21339200 |
| O  | -0.98102600 | 3.24736500  | -2.48074800 |
| S  | -0.84441800 | -2.13553700 | 1.31212200  |
| O  | -1.87218400 | -3.04518400 | 0.75844800  |
| O  | -0.57825600 | -2.11696200 | 2.75444100  |
| C  | 0.70871500  | -2.56002400 | 0.49059700  |
| C  | 1.89968300  | -2.51673800 | 1.21693000  |
| C  | 0.69328800  | -2.90950800 | -0.86404600 |
| C  | 3.10203000  | -2.81697800 | 0.57903700  |

|   |             |             |             |
|---|-------------|-------------|-------------|
| H | 1.87455900  | -2.26464000 | 2.27133700  |
| C | 1.89083500  | -3.20735000 | -1.50603100 |
| H | -0.24722700 | -2.96349100 | -1.40140300 |
| C | 3.07616300  | -3.15200300 | -0.77264200 |
| H | 4.04658400  | -2.79879100 | 1.10862500  |
| H | 1.92248000  | -3.48933300 | -2.55120500 |
| N | 4.34592500  | -3.46542000 | -1.45338600 |
| O | 4.29553600  | -3.74215300 | -2.65119100 |
| O | 5.37597600  | -3.42737200 | -0.78324000 |
| C | 0.61370500  | 2.70377200  | -0.46203700 |
| C | 1.44605400  | 3.70777000  | -0.96264300 |
| C | 0.98040800  | 1.91041600  | 0.62801700  |
| C | 2.67913700  | 3.93120800  | -0.35364500 |
| H | 1.12937700  | 4.29954300  | -1.81379700 |
| C | 2.21339900  | 2.13406300  | 1.23494200  |
| H | 0.32332600  | 1.12047700  | 0.98528900  |
| C | 3.03830600  | 3.13988800  | 0.73415000  |
| H | 3.35625000  | 4.69868100  | -0.70719100 |
| H | 2.54127000  | 1.54372800  | 2.08147700  |
| N | 4.34639800  | 3.37363700  | 1.38014400  |
| O | 5.05110300  | 4.27192100  | 0.92515200  |
| O | 4.64534100  | 2.65458800  | 2.33106900  |
| C | -4.14059800 | 0.53971400  | 0.39167600  |
| C | -3.97038200 | -0.16966500 | 1.60632500  |
| H | -3.71835100 | 1.53878700  | 0.33970900  |
| C | -2.93688100 | 0.23844700  | 2.41265300  |
| H | -2.42987600 | 1.17973300  | 2.23506900  |
| C | -4.71330000 | -1.46025200 | 1.86357200  |
| H | -4.49522500 | -1.84281400 | 2.86383400  |
| H | -5.79777300 | -1.32745500 | 1.77628100  |

|   |             |             |             |
|---|-------------|-------------|-------------|
| H | -4.40718800 | -2.23250900 | 1.14686100  |
| C | -5.20849500 | 0.21966400  | -0.61626300 |
| H | -5.29641300 | -0.86522200 | -0.75412300 |
| C | -5.03449200 | 0.92628200  | -1.96460600 |
| H | -4.99046800 | 2.01340300  | -1.83951400 |
| H | -4.10625300 | 0.61567400  | -2.45717500 |
| H | -6.16590000 | 0.53322400  | -0.16580200 |
| H | -2.65784100 | -0.30683000 | 3.30846700  |
| H | -5.86681400 | 0.69307700  | -2.63568900 |
| H | -0.38981100 | 0.53408000  | -2.25139400 |

TS17

1 imaginary frequency

H = -4716.504083

G = -4716.597767

Esol = -4716.921516

|    |             |             |             |
|----|-------------|-------------|-------------|
| Se | -0.44342900 | -1.83139200 | 0.60349400  |
| N  | 0.32479200  | -0.55640100 | 1.73557700  |
| N  | -0.44987100 | -0.97945000 | -0.97684800 |
| S  | 1.92383300  | -0.39605000 | 2.18960000  |
| O  | 2.57564600  | -1.66728400 | 1.86655500  |
| O  | 1.93333700  | 0.13659500  | 3.55110000  |
| S  | -1.94231300 | -1.04459800 | -1.70949700 |
| O  | -2.62120600 | -2.32007800 | -1.38482100 |
| O  | -1.73882100 | -0.66027500 | -3.10911100 |
| C  | -2.90658700 | 0.26388700  | -0.92202900 |
| C  | -3.00648000 | 1.50533900  | -1.55160500 |
| C  | -3.51784000 | 0.01858000  | 0.31215600  |
| C  | -3.72240200 | 2.52899000  | -0.93402700 |



|   |             |             |             |
|---|-------------|-------------|-------------|
| H | -2.53787300 | 1.65534300  | -2.51791600 |
| C | -4.23001700 | 1.03927000  | 0.93460800  |
| H | -3.44701600 | -0.96260700 | 0.76869600  |
| C | -4.31663200 | 2.27868700  | 0.30070900  |
| H | -3.82725300 | 3.50520700  | -1.39101600 |
| H | -4.72442400 | 0.89029000  | 1.88659200  |
| N | -5.07088400 | 3.36096600  | 0.96015900  |
| O | -5.57791500 | 3.11577500  | 2.05373300  |
| O | -5.14284900 | 4.44128100  | 0.37754300  |
| C | 2.59817900  | 0.88856100  | 1.12081200  |
| C | 3.62332100  | 1.68240800  | 1.64408200  |
| C | 2.13376100  | 1.04993800  | -0.18643600 |
| C | 4.21276100  | 2.65038800  | 0.83592200  |
| H | 3.94376000  | 1.55142100  | 2.67173700  |
| C | 2.72104400  | 2.02250400  | -0.99350300 |
| H | 1.31117000  | 0.45065100  | -0.56870500 |
| C | 3.75119800  | 2.80019900  | -0.47014600 |
| H | 5.00878400  | 3.28713900  | 1.20113400  |
| H | 2.38762500  | 2.18640600  | -2.01077900 |
| N | 4.37227600  | 3.82886600  | -1.32861600 |
| O | 5.27652700  | 4.50399900  | -0.84122100 |
| O | 3.94635500  | 3.94277000  | -2.47601500 |
| C | 1.16477300  | -3.64789300 | -0.24248600 |
| C | 1.65683900  | -2.96775000 | -1.38612000 |
| H | 1.83840600  | -3.71531600 | 0.60970500  |
| C | 3.05512100  | -2.38635500 | -1.35961100 |
| H | 3.32402400  | -2.03018200 | -0.36220900 |
| C | 0.80472800  | -2.70793800 | -2.42693200 |
| H | 1.11277700  | -2.09513000 | -3.26777700 |
| H | -0.16409000 | -3.18194600 | -2.52265200 |

|   |             |             |             |
|---|-------------|-------------|-------------|
| C | 0.03343200  | -4.65287000 | -0.26432200 |
| H | -0.87713800 | -4.21431300 | -0.69620100 |
| C | -0.27547400 | -5.25132600 | 1.11212300  |
| H | 0.60040300  | -5.75955300 | 1.53037800  |
| H | -0.58036600 | -4.47526200 | 1.82342800  |
| H | 0.32566600  | -5.45521300 | -0.95812000 |
| H | 3.78963300  | -3.15130300 | -1.64320300 |
| H | -1.08954800 | -5.97902000 | 1.04283400  |
| H | -0.29811000 | 0.16122500  | 2.09804500  |
| H | 3.15471000  | -1.55799500 | -2.06761300 |

TS18

1 imaginary frequency

H = -4716.517158

G = -4716.610484

Esol = -4716.934168

|    |             |             |             |
|----|-------------|-------------|-------------|
| Se | 1.11268100  | -1.37416300 | -0.83232100 |
| N  | -0.50947200 | -0.93442500 | 0.11552000  |
| N  | 2.24937100  | -1.19360900 | 0.55055300  |
| S  | -1.17616800 | 0.60260200  | -0.24841900 |
| O  | -0.91603400 | 0.82842900  | -1.67053800 |
| O  | -0.80653000 | 1.58963000  | 0.77130400  |
| S  | 3.53137600  | -0.15541500 | 0.23463100  |
| O  | 4.14565400  | -0.46445900 | -1.06919800 |
| O  | 4.35232700  | -0.15748700 | 1.45403700  |
| C  | 2.79917800  | 1.48799700  | 0.10050300  |
| C  | 2.67057400  | 2.25977900  | 1.25694500  |
| C  | 2.36744900  | 1.95381800  | -1.14340300 |
| C  | 2.09090600  | 3.52187800  | 1.17283700  |

|   |             |             |             |
|---|-------------|-------------|-------------|
| H | 3.03524800  | 1.87645500  | 2.20321700  |
| C | 1.77957100  | 3.21237500  | -1.23024100 |
| H | 2.49497000  | 1.34275400  | -2.02895900 |
| C | 1.65016300  | 3.97178900  | -0.06969600 |
| H | 1.97355100  | 4.15355400  | 2.04421500  |
| H | 1.42298400  | 3.60722200  | -2.17291900 |
| N | 1.02646600  | 5.30391500  | -0.15968400 |
| O | 0.65299000  | 5.68645100  | -1.26755200 |
| O | 0.91816300  | 5.95488900  | 0.87896400  |
| C | -2.93346600 | 0.25998900  | -0.04682000 |
| C | -3.57681900 | 0.67521200  | 1.11976300  |
| C | -3.61931900 | -0.39316000 | -1.07438000 |
| C | -4.93741900 | 0.41495500  | 1.27386000  |
| H | -3.02137700 | 1.20630300  | 1.88476500  |
| C | -4.97736100 | -0.65432400 | -0.92386700 |
| H | -3.09803800 | -0.67758100 | -1.98176400 |
| C | -5.60943600 | -0.24956200 | 0.25148000  |
| H | -5.47758500 | 0.72037600  | 2.16128600  |
| H | -5.54973500 | -1.15552900 | -1.69438900 |
| N | -7.04962900 | -0.53288100 | 0.41540900  |
| O | -7.61943200 | -1.12166400 | -0.50105800 |
| O | -7.58506800 | -0.16547100 | 1.45888200  |
| C | 2.46314000  | -3.99162100 | 0.08601400  |
| C | 1.10792300  | -4.15527100 | -0.14591400 |
| H | 3.14158900  | -4.24068000 | -0.72927600 |
| C | 0.63690900  | -4.78998500 | -1.42687600 |
| H | 1.42303100  | -4.81697900 | -2.18617500 |
| H | 0.31012200  | -5.82259900 | -1.23590200 |
| H | -0.22819700 | -4.25595000 | -1.83416900 |
| C | 0.05467400  | -4.00735900 | 0.91772100  |

|   |             |             |            |
|---|-------------|-------------|------------|
| H | -0.23703500 | -5.00772000 | 1.26982900 |
| H | 0.38982200  | -3.43818100 | 1.78660700 |
| H | -0.84679100 | -3.53232800 | 0.51971500 |
| C | 3.01444600  | -3.31400600 | 1.17649600 |
| H | 2.40227600  | -3.11605100 | 2.04796700 |
| C | 4.49196600  | -3.24814300 | 1.38882100 |
| H | 5.04182100  | -3.28212000 | 0.44386400 |
| H | 4.78250600  | -2.34917300 | 1.93331700 |
| H | 4.78892500  | -4.12259600 | 1.98933000 |
| H | -0.25474800 | -0.95234800 | 1.10818800 |

TS19

1 imaginary frequency

H = -4871.293841

G = -4871.391755

Esol = -4871.779306

|    |             |             |             |
|----|-------------|-------------|-------------|
| Se | -1.39008600 | -0.21324200 | -1.51478800 |
| N  | -1.22392300 | 1.53200500  | -1.56616100 |
| N  | -1.03842700 | -0.87116200 | 0.14548700  |
| S  | -0.87325000 | 2.53165200  | -0.28177700 |
| O  | -1.50948400 | 2.09901700  | 0.97082300  |
| O  | -1.09815500 | 3.88636500  | -0.79176900 |
| S  | -0.33832100 | -2.42387600 | 0.05825600  |
| O  | -0.61353300 | -3.03691000 | -1.25550500 |
| O  | -0.72822600 | -3.11844500 | 1.28790700  |
| C  | 1.43285400  | -2.10442500 | 0.12305200  |
| C  | 2.17182700  | -2.67592600 | 1.15851900  |
| C  | 2.04277300  | -1.38727700 | -0.90962500 |
| C  | 3.55943800  | -2.53432500 | 1.15897800  |

|   |             |             |             |
|---|-------------|-------------|-------------|
| H | 1.66513800  | -3.22773400 | 1.94219900  |
| C | 3.42584100  | -1.24926400 | -0.91374400 |
| H | 1.44779100  | -0.93158300 | -1.69382400 |
| C | 4.15965400  | -1.82743300 | 0.12175200  |
| H | 4.17423700  | -2.96462100 | 1.93975900  |
| H | 3.94021800  | -0.70617200 | -1.69647100 |
| N | 5.63099200  | -1.69059200 | 0.10914400  |
| O | 6.26090300  | -2.27923500 | 0.98294900  |
| O | 6.12472600  | -1.00485600 | -0.78295500 |
| C | 0.90420200  | 2.36159400  | -0.02982200 |
| C | 1.36798900  | 1.66593200  | 1.08775700  |
| C | 1.78326700  | 2.97291500  | -0.92910900 |
| C | 2.74028100  | 1.56127700  | 1.30325300  |
| H | 0.65616500  | 1.22355900  | 1.77458800  |
| C | 3.15483000  | 2.87429000  | -0.71593300 |
| H | 1.39357400  | 3.53417400  | -1.77153400 |
| C | 3.60816600  | 2.16170400  | 0.39445800  |
| H | 3.14213100  | 1.02863500  | 2.15606100  |
| H | 3.87058600  | 3.33887300  | -1.38293300 |
| N | 5.06076200  | 2.03768500  | 0.61518900  |
| O | 5.43526300  | 1.26523800  | 1.49808900  |
| O | 5.80444600  | 2.70849100  | -0.09554500 |
| C | -4.02276800 | 0.03552700  | 1.51201400  |
| C | -3.62904300 | -1.26700500 | 0.88963900  |
| C | -3.86745700 | -1.48973600 | -0.49261800 |
| C | -3.89676800 | -0.37883800 | -1.35920000 |
| C | -4.30708200 | 0.99604900  | -0.90856400 |
| C | -4.39846800 | 1.18622000  | 0.60280900  |
| H | -4.02156400 | -0.58747900 | -2.42124700 |
| H | -3.60077600 | 1.73102800  | -1.32170500 |

|   |             |             |             |
|---|-------------|-------------|-------------|
| H | -5.26828900 | 1.22409600  | -1.39541200 |
| H | -4.04902400 | 2.15941300  | 0.93058100  |
| C | -3.82231900 | -2.87831300 | -1.06676700 |
| H | -3.25195800 | -2.90830400 | -2.00055600 |
| H | -3.37740900 | -3.59322100 | -0.37033200 |
| H | -4.84473500 | -3.21339200 | -1.28891300 |
| H | -3.67983700 | -2.14857700 | 1.53315200  |
| C | -5.46926800 | 0.55185400  | 1.46701600  |
| H | -3.45967400 | 0.28719300  | 2.40661000  |
| C | -6.59404600 | -0.26806300 | 0.86264600  |
| H | -6.28049300 | -0.87942700 | 0.01208500  |
| H | -7.02942700 | -0.94023500 | 1.61257500  |
| H | -7.39658000 | 0.39273800  | 0.51051800  |
| C | -5.90834900 | 1.35121300  | 2.68537200  |
| H | -6.71270300 | 2.05042600  | 2.42272600  |
| H | -6.28652800 | 0.68964800  | 3.47515000  |
| H | -5.08183500 | 1.93588000  | 3.10278100  |
| H | -2.32759800 | -1.12979400 | 0.71440000  |

TS2

1 imaginary frequency

H = -1511.666421

G = -1511.741358

Esol = -1511.948730

|   |             |            |            |
|---|-------------|------------|------------|
| C | 0.56860300  | 3.50430900 | 0.55962400 |
| O | 1.68066300  | 3.15136000 | 0.08325200 |
| O | -0.32512600 | 2.70513600 | 1.00738300 |
| C | 0.23952700  | 4.98706800 | 0.58732600 |
| H | 1.15136200  | 5.58661300 | 0.55551800 |

|   |             |             |             |
|---|-------------|-------------|-------------|
| H | -0.36525500 | 5.22675300  | -0.29547400 |
| H | -0.35098600 | 5.22844600  | 1.47501300  |
| I | 2.44540700  | 0.69907200  | 0.07274600  |
| C | 2.89960900  | -1.38733400 | 0.31597100  |
| C | 3.31139800  | -1.82019300 | 1.57791500  |
| C | 2.83707700  | -2.25789400 | -0.77253400 |
| C | 3.67794100  | -3.15689300 | 1.74904400  |
| H | 3.34757400  | -1.13440000 | 2.41857900  |
| C | 3.20423200  | -3.59206700 | -0.58539800 |
| H | 2.48366200  | -1.91484500 | -1.73760800 |
| C | 3.62478900  | -4.03993000 | 0.66909900  |
| H | 3.99885000  | -3.50450900 | 2.72685300  |
| H | 3.15647600  | -4.28091800 | -1.42393800 |
| H | 3.90932100  | -5.07942100 | 0.80556300  |
| N | 0.36214600  | 0.39671300  | 0.21501400  |
| S | -0.37463400 | 0.18933800  | -1.32151000 |
| O | -0.45671600 | 1.43922600  | -2.08231700 |
| O | 0.19261500  | -1.00372200 | -1.96527000 |
| H | 0.01266700  | 1.43197500  | 0.64745800  |
| C | -2.00786500 | -0.20575500 | -0.67645500 |
| C | -2.78304400 | 0.81226700  | -0.11114700 |
| C | -2.47380500 | -1.51579600 | -0.80115500 |
| C | -4.06181700 | 0.50374300  | 0.34545500  |
| H | -2.38394100 | 1.81592800  | -0.00560800 |
| C | -3.75683500 | -1.82082200 | -0.35330400 |
| H | -1.84037900 | -2.27299200 | -1.24908300 |
| C | -4.52479300 | -0.80467800 | 0.21214600  |
| H | -4.69796800 | 1.25449200  | 0.79709500  |
| H | -4.16568800 | -2.82014400 | -0.43421300 |
| N | -5.88323800 | -1.12894100 | 0.69168800  |

|   |             |             |            |
|---|-------------|-------------|------------|
| O | -6.26579100 | -2.29099800 | 0.56903100 |
| O | -6.54446900 | -0.21696800 | 1.18317700 |

TS20

l imaginary frequency

H = -4871.289063

G = -4871.385552

Esol = -4871.774786

|    |             |             |             |
|----|-------------|-------------|-------------|
| Se | 1.30521900  | 0.57405500  | -1.08948500 |
| N  | 0.92055700  | -0.27581500 | 0.43570500  |
| N  | 1.30424700  | 2.33815400  | -0.70510300 |
| S  | 0.62909000  | -1.87872000 | 0.11494500  |
| O  | 1.09178900  | -2.67424100 | 1.25454800  |
| O  | 1.09502900  | -2.20971800 | -1.25803000 |
| S  | 0.50521000  | 3.02688200  | 0.65253300  |
| O  | 0.58420500  | 4.46354600  | 0.38595200  |
| O  | 1.01737600  | 2.48024500  | 1.91154600  |
| C  | -1.20379700 | 2.50983500  | 0.46778600  |
| C  | -2.00671900 | 3.15165400  | -0.47924500 |
| C  | -1.70742200 | 1.53550700  | 1.33005400  |
| C  | -3.34828200 | 2.79575300  | -0.57998300 |
| H  | -1.59045600 | 3.92929400  | -1.11030200 |
| C  | -3.05032900 | 1.17831100  | 1.22989500  |
| H  | -1.05315900 | 1.07319300  | 2.05889200  |
| C  | -3.84175100 | 1.81042200  | 0.27462300  |
| H  | -4.01115500 | 3.26777700  | -1.29440600 |
| H  | -3.48514000 | 0.42486900  | 1.87429300  |
| N  | -5.26289800 | 1.42267000  | 0.16360900  |
| O  | -5.96718300 | 2.06564000  | -0.61043400 |



|   |             |             |             |
|---|-------------|-------------|-------------|
| O | -5.64741400 | 0.47853300  | 0.85158300  |
| C | -1.16910300 | -2.03722800 | 0.04861800  |
| C | -1.86059000 | -1.45533100 | -1.01823100 |
| C | -1.82816900 | -2.78851700 | 1.02078500  |
| C | -3.23370900 | -1.64134800 | -1.12565100 |
| H | -1.32927900 | -0.86678900 | -1.75932400 |
| C | -3.20818700 | -2.96961500 | 0.92338200  |
| H | -1.26002900 | -3.23426100 | 1.82965600  |
| C | -3.88452700 | -2.39687400 | -0.14975700 |
| H | -3.80467500 | -1.22056200 | -1.94399100 |
| H | -3.75833200 | -3.55010400 | 1.65361900  |
| N | -5.34085700 | -2.60599100 | -0.26960400 |
| O | -5.88770700 | -3.29112400 | 0.59129500  |
| O | -5.90920100 | -2.08857200 | -1.22837600 |
| C | 4.26879900  | -1.09008300 | 0.99534200  |
| C | 4.04816000  | 0.41057700  | 1.09870000  |
| C | 3.99812400  | 1.17023400  | -0.19788700 |
| C | 3.65748300  | 0.48423500  | -1.39526100 |
| C | 3.99965500  | -0.97185900 | -1.62343200 |
| C | 4.23329700  | -1.78093200 | -0.35550500 |
| H | 3.63687200  | 1.09718700  | -2.29826600 |
| H | 3.20863100  | -1.45039600 | -2.20893900 |
| H | 4.89268300  | -0.97960900 | -2.26797300 |
| H | 3.73955700  | -2.74789500 | -0.36950300 |
| C | 3.92313600  | 2.57814100  | -0.19874600 |
| H | 4.15482000  | 3.11216500  | 0.72119500  |
| H | 4.19094700  | 3.10793700  | -1.11440300 |
| H | 4.78151700  | 0.88391000  | 1.76387100  |
| C | 5.53193200  | -1.71155100 | 0.43414500  |
| H | 3.79126300  | -1.63728300 | 1.80397400  |

|   |            |             |             |
|---|------------|-------------|-------------|
| C | 6.67897800 | -0.83703200 | -0.04545000 |
| H | 7.28578100 | -1.36738600 | -0.79071000 |
| H | 6.35058400 | 0.10316200  | -0.50003600 |
| H | 7.34197900 | -0.58008600 | 0.79039400  |
| C | 6.00090900 | -3.00553800 | 1.08253200  |
| H | 6.59226800 | -3.60677100 | 0.37977200  |
| H | 6.63085600 | -2.80137900 | 1.95807500  |
| H | 5.15470700 | -3.61632600 | 1.41499000  |
| H | 3.06553200 | 0.57035400  | 1.57465500  |
| H | 2.59815600 | 2.62040500  | -0.37987800 |

TS21

1 imaginary frequency

H = -4871.292077

G = -4871.388875

Esol = -4871.778497

|    |             |             |             |
|----|-------------|-------------|-------------|
| Se | -1.42312700 | 0.50410700  | -1.27846600 |
| N  | -0.66506300 | 2.08236700  | -1.39921600 |
| N  | -0.99290100 | -0.29737000 | 0.28771700  |
| S  | -0.25622100 | 3.03084700  | -0.09810300 |
| O  | -1.08944900 | 2.73837900  | 1.08538000  |
| O  | -0.17592800 | 4.39975300  | -0.61256100 |
| S  | -0.79166100 | -1.97090100 | 0.10585100  |
| O  | -1.46525600 | -2.44531600 | -1.11864600 |
| O  | -1.11367500 | -2.58204300 | 1.39811400  |
| C  | 0.98850900  | -2.14231500 | -0.14931100 |
| C  | 1.62418900  | -3.21168200 | 0.48435200  |
| C  | 1.67706500  | -1.29062100 | -1.01712600 |
| C  | 2.97454000  | -3.44626400 | 0.23323300  |

|   |             |             |             |
|---|-------------|-------------|-------------|
| H | 1.06834100  | -3.84412800 | 1.16732400  |
| C | 3.02534500  | -1.52182000 | -1.26884500 |
| H | 1.18046400  | -0.44241800 | -1.47322800 |
| C | 3.64800700  | -2.60041600 | -0.64341300 |
| H | 3.50511800  | -4.26537700 | 0.70242800  |
| H | 3.59507400  | -0.88374000 | -1.93261000 |
| N | 5.07620100  | -2.85371300 | -0.92135100 |
| O | 5.59826100  | -3.81877900 | -0.36845400 |
| O | 5.64701700  | -2.08537300 | -1.69225500 |
| C | 1.42549200  | 2.54870600  | 0.33582400  |
| C | 1.63923000  | 1.67897100  | 1.40683300  |
| C | 2.48881400  | 3.08201500  | -0.39861200 |
| C | 2.94311600  | 1.32421500  | 1.74550000  |
| H | 0.79377100  | 1.29414500  | 1.96412900  |
| C | 3.79299300  | 2.72906500  | -0.06458300 |
| H | 2.29248900  | 3.77865700  | -1.20620600 |
| C | 3.99560000  | 1.85362900  | 1.00196600  |
| H | 3.15375900  | 0.65647200  | 2.57154900  |
| H | 4.64564900  | 3.12379400  | -0.60300400 |
| N | 5.37689900  | 1.48184000  | 1.36317500  |
| O | 5.52717200  | 0.67432900  | 2.27903400  |
| O | 6.29094500  | 2.00080000  | 0.72573200  |
| C | -4.52282400 | -1.49226600 | -0.05634400 |
| C | -4.37917900 | -0.49833500 | -1.20763900 |
| C | -3.53755900 | 1.19762100  | 0.48637900  |
| C | -4.01866000 | -1.12492300 | 1.32515300  |
| H | -3.24360900 | 2.21773800  | 0.71354000  |
| H | -3.25651800 | 0.59200000  | 2.50635500  |
| H | -3.54299200 | -1.91827700 | 1.89400200  |
| C | -4.03521800 | 1.96708300  | -1.86666200 |

|   |             |             |             |
|---|-------------|-------------|-------------|
| H | -3.88461700 | 1.61374200  | -2.89267300 |
| H | -5.07840000 | 2.30061500  | -1.78946500 |
| H | -3.38708700 | 2.83161900  | -1.69865300 |
| H | -3.78365400 | -0.96698800 | -2.00105800 |
| C | -5.51814900 | -1.29843800 | 1.07403500  |
| H | -4.35038000 | -2.52059500 | -0.36250100 |
| C | -6.47637000 | -0.12101300 | 1.08616700  |
| H | -7.33107000 | -0.31499300 | 0.42544200  |
| H | -6.87364800 | 0.03696600  | 2.09625200  |
| H | -6.01814000 | 0.81881000  | 0.76545200  |
| C | -6.13026200 | -2.56546700 | 1.65434800  |
| H | -6.43264300 | -2.41288600 | 2.69798500  |
| H | -7.02291000 | -2.86179100 | 1.08863900  |
| H | -5.42472200 | -3.40277300 | 1.62853400  |
| H | -5.36165300 | -0.30602200 | -1.66633400 |
| H | -2.12983800 | -0.03367600 | 1.14275800  |
| C | -3.36425400 | 0.21349900  | 1.48785100  |
| C | -3.78692600 | 0.86283600  | -0.86207600 |

TS3

1 imaginary frequency

H = -4731.155909

G = -4731.263889

Esol = -4731.884115

|    |             |             |             |
|----|-------------|-------------|-------------|
| Se | 1.40343400  | -0.28199300 | -1.58346800 |
| I  | -2.65659100 | -2.77784300 | -0.46785200 |
| C  | -4.65727600 | -1.99942100 | -0.60031500 |
| C  | -5.28822700 | -1.60683600 | 0.57974800  |
| C  | -5.26813500 | -1.88891000 | -1.84882800 |

|   |             |             |             |
|---|-------------|-------------|-------------|
| C | -6.59096700 | -1.10873000 | 0.49719000  |
| H | -4.77206700 | -1.67121500 | 1.53135000  |
| C | -6.57390600 | -1.39560200 | -1.90720400 |
| H | -4.74800600 | -2.18000800 | -2.75505800 |
| C | -7.23317500 | -1.00744500 | -0.73885100 |
| H | -7.10075500 | -0.79904100 | 1.40512700  |
| H | -7.06889000 | -1.30963500 | -2.87037400 |
| H | -8.24622500 | -0.61944800 | -0.79301500 |
| N | -1.04277600 | -1.20685700 | -0.07538100 |
| S | -1.36570300 | -0.32800900 | 1.30495600  |
| O | -2.31623800 | -0.95983000 | 2.24494300  |
| O | -0.04769700 | 0.09919000  | 1.82461400  |
| C | -2.18419500 | 1.19469400  | 0.75558500  |
| C | -3.21996700 | 1.72408100  | 1.52891000  |
| C | -1.74926700 | 1.83427400  | -0.41004400 |
| C | -3.83528400 | 2.91100300  | 1.13628500  |
| H | -3.53776500 | 1.20246100  | 2.42475000  |
| C | -2.36006800 | 3.02008000  | -0.80777500 |
| H | -0.94715300 | 1.39564500  | -0.99695600 |
| C | -3.39431600 | 3.53879400  | -0.02709000 |
| H | -4.64206200 | 3.35138500  | 1.70896100  |
| H | -2.05425500 | 3.54203300  | -1.70605700 |
| N | -4.04706500 | 4.78838900  | -0.44950300 |
| O | -3.63839000 | 5.32810200  | -1.47733000 |
| O | -4.96403700 | 5.21977100  | 0.24974400  |
| P | 2.96092700  | 0.05300000  | -0.11780000 |
| C | 6.50265900  | -0.23734700 | -3.26426600 |
| C | 6.26934000  | -1.41269700 | -2.30645200 |
| C | 4.87944300  | -1.34112200 | -1.65244900 |
| C | 4.66035700  | 0.00170700  | -0.91807200 |

|   |            |             |             |
|---|------------|-------------|-------------|
| C | 4.90311700 | 1.18365300  | -1.88136400 |
| C | 6.28911100 | 1.10061900  | -2.54518700 |
| H | 5.80124500 | -0.31271300 | -4.10769700 |
| H | 7.51327000 | -0.28442000 | -3.68938000 |
| H | 7.04431400 | -1.40560400 | -1.52523400 |
| H | 4.10110300 | -1.44687800 | -2.41861000 |
| H | 5.37782000 | 0.07390200  | -0.08773200 |
| H | 4.11979500 | 1.17877300  | -2.65070500 |
| H | 4.81843100 | 2.13601500  | -1.34853900 |
| H | 7.06690200 | 1.22712500  | -1.77710800 |
| H | 6.40587800 | 1.93660400  | -3.24648700 |
| H | 6.37180400 | -2.36713900 | -2.83829500 |
| H | 4.75262800 | -2.18412600 | -0.96474800 |
| C | 3.47816100 | -3.72421000 | 2.81314600  |
| C | 2.14165200 | -3.48192000 | 2.09748900  |
| C | 2.29973200 | -2.56923600 | 0.86960100  |
| C | 2.95189400 | -1.23020400 | 1.27402300  |
| C | 4.32196600 | -1.48700100 | 1.94400900  |
| C | 4.15914900 | -2.39757600 | 3.17574600  |
| H | 4.14385500 | -4.30258100 | 2.15486600  |
| H | 3.32699600 | -4.33058000 | 3.71541100  |
| H | 1.43029700 | -3.01765800 | 2.79532100  |
| H | 2.91932200 | -3.07442000 | 0.11546600  |
| H | 2.28214100 | -0.76414700 | 2.00849800  |
| H | 4.99780300 | -1.97696800 | 1.23063400  |
| H | 4.80999000 | -0.55451000 | 2.24581400  |
| H | 3.55822800 | -1.87299400 | 3.93251600  |
| H | 5.14277200 | -2.58094800 | 3.62748500  |
| H | 1.69798300 | -4.43734300 | 1.78870500  |
| H | 1.32705900 | -2.38068800 | 0.40989400  |

|   |            |            |             |
|---|------------|------------|-------------|
| C | 3.01796400 | 4.53936600 | 1.59374500  |
| C | 3.52235900 | 3.39458300 | 2.48226400  |
| C | 3.89632300 | 2.14488900 | 1.66153900  |
| C | 2.71304800 | 1.69260700 | 0.77743200  |
| C | 2.24323000 | 2.84597300 | -0.13477900 |
| C | 1.85613000 | 4.07520600 | 0.70400300  |
| H | 3.84182900 | 4.89622100 | 0.95748400  |
| H | 2.71070600 | 5.39109200 | 2.21370200  |
| H | 2.73815700 | 3.12274300 | 3.20318400  |
| H | 4.76838400 | 2.37392200 | 1.03254000  |
| H | 1.86644300 | 1.44108300 | 1.43093700  |
| H | 3.04007200 | 3.12968900 | -0.83387400 |
| H | 1.39816300 | 2.51219600 | -0.74290800 |
| H | 0.98991500 | 3.82458500 | 1.33291300  |
| H | 1.53667700 | 4.88769900 | 0.03902600  |
| H | 4.39080900 | 3.71804600 | 3.07055600  |
| H | 4.20095800 | 1.35018400 | 2.34959800  |

TS4

1 imaginary frequency

H = -5770.742226

G = -5770.873088

Esol = -5771.590943

|    |             |             |             |
|----|-------------|-------------|-------------|
| Se | -1.22198800 | -0.28370600 | -0.68808600 |
| N  | -1.28729100 | -1.94501400 | 0.07012900  |
| S  | -1.46976700 | -3.20621800 | -0.96636800 |
| O  | -1.68301500 | -2.83456900 | -2.38475600 |
| O  | -2.39773900 | -4.17823000 | -0.35249200 |
| C  | 0.15472200  | -4.00600900 | -0.90359600 |

|   |             |             |             |
|---|-------------|-------------|-------------|
| C | 1.09105100  | -3.73991500 | -1.90639400 |
| C | 0.46067900  | -4.85826100 | 0.16229800  |
| C | 2.36137200  | -4.30419900 | -1.83035300 |
| H | 0.81241300  | -3.10588600 | -2.74110000 |
| C | 1.72397500  | -5.43640400 | 0.24097700  |
| H | -0.29543000 | -5.07079000 | 0.90990000  |
| C | 2.66055300  | -5.13745300 | -0.75104900 |
| H | 3.11130400  | -4.11945000 | -2.58958400 |
| H | 1.99481800  | -6.10559300 | 1.04850800  |
| N | 4.00513200  | -5.71732000 | -0.65373900 |
| O | 4.19996000  | -6.58409300 | 0.19586700  |
| O | 4.87078900  | -5.29262600 | -1.42682800 |
| I | 2.45049300  | 0.19542300  | 2.47282000  |
| C | 4.04551600  | -0.30140000 | 1.12914100  |
| C | 4.07434500  | -1.57397400 | 0.56002100  |
| C | 5.01551700  | 0.66211400  | 0.85249900  |
| C | 5.12669200  | -1.89400300 | -0.30248500 |
| H | 3.30183700  | -2.30275500 | 0.77849200  |
| C | 6.05771400  | 0.32425700  | -0.01405500 |
| H | 4.96753300  | 1.65029900  | 1.29634600  |
| C | 6.11408000  | -0.94802500 | -0.58695700 |
| H | 5.17015400  | -2.88387400 | -0.74817700 |
| H | 6.82374000  | 1.06115400  | -0.23813600 |
| H | 6.92879100  | -1.20394900 | -1.25792200 |
| N | 0.67825400  | 0.79440300  | 1.04428200  |
| S | 0.58083100  | 2.46132800  | 1.03599000  |
| O | -0.65981800 | 2.75926900  | 0.27516900  |
| O | 0.74811800  | 3.10196700  | 2.35433900  |
| C | 1.93321100  | 3.09324600  | 0.00840000  |
| C | 2.17461300  | 2.51077100  | -1.24008300 |



|   |             |             |             |
|---|-------------|-------------|-------------|
| C | 2.69801200  | 4.16831100  | 0.46586000  |
| C | 3.19273500  | 3.00992600  | -2.04593800 |
| H | 1.57911000  | 1.66426100  | -1.56599900 |
| C | 3.72184100  | 4.67300400  | -0.33507100 |
| H | 2.48587600  | 4.59601000  | 1.43949700  |
| C | 3.95035000  | 4.08438200  | -1.57725300 |
| H | 3.41171200  | 2.58406700  | -3.01717400 |
| H | 4.33634600  | 5.50595600  | -0.01630400 |
| N | 5.03716600  | 4.60885900  | -2.42260500 |
| O | 5.70076000  | 5.54615200  | -1.98131500 |
| O | 5.21638700  | 4.07487100  | -3.51629100 |
| P | -3.27262700 | 0.58376800  | -0.04618900 |
| C | -5.96682400 | -3.10375900 | -1.30473600 |
| C | -5.86465500 | -1.90453900 | -2.25634800 |
| C | -4.65500000 | -1.01684900 | -1.91591900 |
| C | -4.69798300 | -0.56221600 | -0.43623500 |
| C | -4.83287700 | -1.76096500 | 0.53270400  |
| C | -6.04405100 | -2.63120800 | 0.15248500  |
| H | -5.08402200 | -3.74440200 | -1.42693600 |
| H | -6.84618800 | -3.71082400 | -1.55411500 |
| H | -6.78910100 | -1.30926800 | -2.19882500 |
| H | -3.73263200 | -1.57505000 | -2.10783600 |
| H | -5.57956600 | 0.08301600  | -0.29803400 |
| H | -3.92669800 | -2.37252000 | 0.50706500  |
| H | -4.95571600 | -1.40057800 | 1.55951800  |
| H | -6.97252600 | -2.05914000 | 0.30571600  |
| H | -6.08726800 | -3.49052700 | 0.83230600  |
| H | -5.77267900 | -2.24365600 | -3.29522600 |
| H | -4.63985600 | -0.14583500 | -2.58218400 |
| C | -4.32339700 | 4.11904600  | -3.09582000 |

|   |             |             |             |
|---|-------------|-------------|-------------|
| C | -2.85718100 | 3.71581200  | -2.89052400 |
| C | -2.72248400 | 2.30988600  | -2.28090000 |
| C | -3.51542500 | 2.21367300  | -0.95678600 |
| C | -5.00000500 | 2.58560700  | -1.18446000 |
| C | -5.11655400 | 3.99727600  | -1.78787700 |
| H | -4.77837300 | 3.46837100  | -3.85705100 |
| H | -4.38607800 | 5.14377600  | -3.48216400 |
| H | -2.36638200 | 4.43791900  | -2.22288500 |
| H | -3.08726900 | 1.55898700  | -2.99361300 |
| H | -3.07092900 | 2.93900200  | -0.26436800 |
| H | -5.46032600 | 1.86664200  | -1.87408200 |
| H | -5.57137400 | 2.53859400  | -0.25084000 |
| H | -4.74198700 | 4.73251300  | -1.06131100 |
| H | -6.17503000 | 4.23236500  | -1.95554400 |
| H | -2.31398300 | 3.75015000  | -3.84290200 |
| H | -1.66573200 | 2.09875500  | -2.09939300 |
| C | -3.56777600 | 1.04218100  | 4.69890800  |
| C | -4.21943200 | 2.09950900  | 3.79706300  |
| C | -4.46733600 | 1.57069700  | 2.37085400  |
| C | -3.15276900 | 1.02779900  | 1.76449300  |
| C | -2.53174000 | -0.06979100 | 2.65859100  |
| C | -2.28025100 | 0.49281400  | 4.06809500  |
| H | -4.27520900 | 0.21506400  | 4.85936700  |
| H | -3.35847300 | 1.47108700  | 5.68678000  |
| H | -3.56535400 | 2.98093000  | 3.73912600  |
| H | -5.22198700 | 0.77309200  | 2.40384700  |
| H | -2.42836400 | 1.85221000  | 1.71439500  |
| H | -3.20447400 | -0.93205200 | 2.72708300  |
| H | -1.59731600 | -0.43016500 | 2.22262000  |
| H | -1.52777700 | 1.29220400  | 4.00709800  |

|   |             |             |            |
|---|-------------|-------------|------------|
| H | -1.85395100 | -0.29583400 | 4.70070700 |
| H | -5.16997200 | 2.44041900  | 4.22656400 |
| H | -4.88154000 | 2.37909000  | 1.75785100 |

TS5

1 imaginary frequency

H = -5684.905309

G = -5685.031982

Esol = -5685.767228

|    |             |             |             |
|----|-------------|-------------|-------------|
| Se | -0.17750700 | -1.03006000 | -1.74240900 |
| N  | -1.69665600 | -0.79056300 | -0.88733800 |
| N  | 0.59452700  | -2.54912700 | -1.13013000 |
| S  | -2.17376500 | -1.86827800 | 0.26091900  |
| O  | -1.32257400 | -1.84232300 | 1.46757700  |
| O  | -2.48565800 | -3.19242200 | -0.32056600 |
| S  | 2.26350200  | -2.57464600 | -1.35683600 |
| O  | 2.67152800  | -1.45461300 | -2.22965800 |
| O  | 2.63808400  | -3.93966500 | -1.73819300 |
| C  | -0.95927700 | -2.03005700 | -3.67369600 |
| C  | -1.38311100 | -3.28048900 | -3.18729500 |
| C  | -0.47950900 | -4.31828800 | -2.86106300 |
| H  | -2.39111300 | -3.34716400 | -2.78340900 |
| H  | 0.43097700  | -4.36315000 | -3.46659300 |
| H  | 0.01698100  | -3.63980900 | -1.87170300 |
| H  | -1.70969500 | -1.28920100 | -3.93692000 |
| H  | -0.02676800 | -1.96696100 | -4.23310000 |
| C  | -0.97391900 | -5.65321900 | -2.33675100 |
| H  | -1.29890700 | -6.30214900 | -3.15973400 |
| H  | -0.17213200 | -6.17243000 | -1.80351000 |

|   |             |             |             |
|---|-------------|-------------|-------------|
| H | -1.81032600 | -5.51283400 | -1.64637800 |
| C | 2.88196100  | -2.27972600 | 0.30852400  |
| C | 4.21465500  | -2.61656600 | 0.56537900  |
| C | 2.05785200  | -1.71987500 | 1.28619800  |
| C | 4.74251300  | -2.37637200 | 1.83004800  |
| H | 4.82425800  | -3.07508900 | -0.20596800 |
| C | 2.58501600  | -1.48781700 | 2.55562900  |
| H | 1.01753500  | -1.50199000 | 1.07588600  |
| C | 3.91629800  | -1.81279400 | 2.80206900  |
| H | 5.76811900  | -2.62317600 | 2.07412600  |
| H | 1.97563600  | -1.06907000 | 3.34650300  |
| N | 4.47393400  | -1.55818400 | 4.14427300  |
| O | 3.73213400  | -1.04686600 | 4.98093900  |
| O | 5.64745600  | -1.86929500 | 4.34098400  |
| C | -3.74060200 | -1.09510900 | 0.70642500  |
| C | -4.02563700 | -0.92015200 | 2.06092300  |
| C | -4.67528500 | -0.77365600 | -0.28173400 |
| C | -5.26249400 | -0.40013200 | 2.43918000  |
| H | -3.27965800 | -1.18325700 | 2.80234700  |
| C | -5.90896000 | -0.24927100 | 0.08863800  |
| H | -4.43217400 | -0.91771900 | -1.32817200 |
| C | -6.18079200 | -0.07272300 | 1.44532400  |
| H | -5.52028700 | -0.24673200 | 3.47966600  |
| H | -6.65706900 | 0.02060300  | -0.64619700 |
| N | -7.48846700 | 0.48301900  | 1.83989800  |
| O | -8.28046100 | 0.76684900  | 0.94232800  |
| O | -7.70640700 | 0.62932900  | 3.04123900  |
| P | 0.96137600  | 1.91652600  | -0.44997600 |
| C | -2.06966900 | 2.61376000  | 3.13128500  |
| C | -2.34621200 | 3.33280200  | 1.80418400  |

|   |             |            |             |
|---|-------------|------------|-------------|
| C | -1.53953800 | 2.72308500 | 0.64426100  |
| C | -0.02432400 | 2.71550200 | 0.94676000  |
| C | 0.23514900  | 1.96905300 | 2.27553700  |
| C | -0.56676600 | 2.57923600 | 3.43783400  |
| H | -2.44886200 | 1.58363900 | 3.06824700  |
| H | -2.61539500 | 3.10013800 | 3.94984800  |
| H | -2.08513200 | 4.39674900 | 1.90683400  |
| H | -1.87522600 | 1.69433500 | 0.45926000  |
| H | 0.30631700  | 3.75732100 | 1.06631400  |
| H | -0.05174400 | 0.91443500 | 2.15293100  |
| H | 1.30240700  | 1.98158100 | 2.52666600  |
| H | -0.20954700 | 3.60271700 | 3.62535700  |
| H | -0.37640000 | 2.01014500 | 4.35671900  |
| H | -3.41739800 | 3.29729400 | 1.56725200  |
| H | -1.74786200 | 3.28625600 | -0.27234500 |
| C | -0.55822700 | 4.83882900 | -3.96247100 |
| C | -0.40857700 | 3.33111600 | -4.21041600 |
| C | -0.36496300 | 2.54434600 | -2.89034100 |
| C | 0.75677500  | 3.05669400 | -1.95440200 |
| C | 0.58667300  | 4.57061800 | -1.70408300 |
| C | 0.54127600  | 5.35881200 | -3.02607900 |
| H | -1.54160500 | 5.03478500 | -3.50983800 |
| H | -0.53843700 | 5.38495300 | -4.91401900 |
| H | 0.51965500  | 3.14571400 | -4.77098200 |
| H | -1.33685000 | 2.63256200 | -2.38551000 |
| H | 1.70368100  | 2.91724800 | -2.49722700 |
| H | -0.34504800 | 4.75202100 | -1.15207700 |
| H | 1.39724400  | 4.95367000 | -1.07623500 |
| H | 1.51591600  | 5.27541300 | -3.52942700 |
| H | 0.38971600  | 6.42552200 | -2.81629800 |

|   |             |            |             |
|---|-------------|------------|-------------|
| H | -1.23129400 | 2.96453100 | -4.83824200 |
| H | -0.22647000 | 1.47543200 | -3.09565200 |
| C | 5.62845800  | 2.97349500 | 0.12216600  |
| C | 5.18700100  | 1.63098500 | -0.47794600 |
| C | 3.74320500  | 1.68862800 | -1.00712600 |
| C | 2.76185700  | 2.14808700 | 0.09407800  |
| C | 3.20020700  | 3.51747500 | 0.65339000  |
| C | 4.64118700  | 3.45835700 | 1.19345200  |
| H | 5.68728500  | 3.72484100 | -0.67959500 |
| H | 6.63767200  | 2.89004900 | 0.54511800  |
| H | 5.25651400  | 0.84688300 | 0.29048200  |
| H | 3.70855100  | 2.39776700 | -1.84716300 |
| H | 2.84863500  | 1.41806700 | 0.91373700  |
| H | 3.15386300  | 4.27159100 | -0.14356600 |
| H | 2.52465000  | 3.85575300 | 1.44751800  |
| H | 4.67433600  | 2.77608300 | 2.05570300  |
| H | 4.93859000  | 4.44652600 | 1.56770000  |
| H | 5.86588500  | 1.33336500 | -1.28732700 |
| H | 3.45027900  | 0.71189500 | -1.40621300 |

TS6

1 imaginary frequency

H = -5684.933818

G = -5685.059823

Esol = -5685.800297

|    |             |             |            |
|----|-------------|-------------|------------|
| Se | 0.18499200  | -1.59502100 | 0.76449800 |
| N  | -0.04116600 | -1.17785800 | 2.50331300 |
| N  | -0.94123600 | -3.21968300 | 0.68131200 |
| S  | -1.56218800 | -0.69250500 | 2.96773700 |

|   |             |             |             |
|---|-------------|-------------|-------------|
| O | -2.61294900 | -1.52459300 | 2.33783800  |
| S | -1.35954200 | -3.58364800 | -0.89655700 |
| C | 2.17631500  | -3.15550900 | 1.78113600  |
| C | 1.44961100  | -3.40267600 | 2.91252300  |
| C | 1.19336300  | -2.36080000 | 3.82721800  |
| H | 0.86892200  | -4.31878100 | 2.99142600  |
| H | 1.87349100  | -1.51394700 | 3.81262500  |
| H | -1.76844500 | -3.05428300 | 1.27129400  |
| H | 2.81260600  | -2.27964100 | 1.70778300  |
| C | 0.49028100  | -2.61681800 | 5.12319400  |
| H | 0.07818600  | -1.70846600 | 5.55874300  |
| H | -0.31337300 | -3.35081400 | 5.01448600  |
| H | 1.23275600  | -3.03360700 | 5.82150600  |
| C | -1.78460500 | 0.98141300  | 2.32975600  |
| C | -1.05978900 | 2.02149400  | 2.91854300  |
| C | -2.71662200 | 1.22325300  | 1.32096500  |
| C | -1.26572400 | 3.32635900  | 2.48538300  |
| H | -0.35994500 | 1.81217500  | 3.72000700  |
| C | -2.92131500 | 2.52816400  | 0.87327500  |
| H | -3.28455000 | 0.39786900  | 0.90921100  |
| C | -2.18849000 | 3.55493800  | 1.46435300  |
| H | -0.73262500 | 4.16184700  | 2.92158900  |
| H | -3.63221800 | 2.75062600  | 0.08591900  |
| N | -2.39196200 | 4.93796100  | 0.99648600  |
| O | -1.83533700 | 5.83889100  | 1.62192400  |
| O | -3.10130200 | 5.10541700  | 0.00506500  |
| C | -2.60934700 | -2.36950000 | -1.36715400 |
| C | -2.20160500 | -1.11331500 | -1.82561600 |
| C | -3.95909200 | -2.67960400 | -1.18644700 |
| C | -3.16154300 | -0.13815700 | -2.08113800 |

|   |             |             |             |
|---|-------------|-------------|-------------|
| H | -1.15095800 | -0.90673800 | -1.98954800 |
| C | -4.92411600 | -1.71152700 | -1.45411900 |
| H | -4.24557300 | -3.66943400 | -0.84821900 |
| C | -4.50457000 | -0.45253400 | -1.87944700 |
| H | -2.88739000 | 0.85027200  | -2.42909200 |
| H | -5.98094800 | -1.91228700 | -1.32920000 |
| N | -5.51842300 | 0.59221800  | -2.11481700 |
| O | -6.69831600 | 0.25127600  | -2.11670900 |
| O | -5.11635000 | 1.74389400  | -2.28510300 |
| O | -0.14854000 | -3.29174700 | -1.68080100 |
| O | -2.00010900 | -4.89697200 | -0.91820700 |
| O | -1.53933200 | -0.56223100 | 4.42855000  |
| H | 2.27983100  | -3.89510400 | 0.99372600  |
| P | 2.48041500  | 0.51739000  | -0.74147400 |
| C | 3.40844400  | -3.23644700 | -3.54556600 |
| C | 4.18148900  | -3.07004100 | -2.23189800 |
| C | 3.50184300  | -2.04174800 | -1.31454100 |
| C | 3.31968600  | -0.66217600 | -1.99167000 |
| C | 2.55090000  | -0.84940400 | -3.31818300 |
| C | 3.22891100  | -1.88046500 | -4.23871600 |
| H | 2.42093900  | -3.66768400 | -3.32979100 |
| H | 3.92617400  | -3.93931600 | -4.21049500 |
| H | 5.20979000  | -2.74318100 | -2.44843700 |
| H | 2.50922600  | -2.41036800 | -1.02552700 |
| H | 4.31176400  | -0.25133500 | -2.23417300 |
| H | 1.52809800  | -1.19282400 | -3.10334600 |
| H | 2.46542000  | 0.10087700  | -3.85576300 |
| H | 4.21197000  | -1.49495700 | -4.54833900 |
| H | 2.63596600  | -1.99396300 | -5.15529000 |
| H | 4.26385200  | -4.03288400 | -1.71087900 |



|   |             |             |             |
|---|-------------|-------------|-------------|
| H | 4.07760100  | -1.93849800 | -0.38715600 |
| C | 5.70092900  | 2.43494900  | 2.17948500  |
| C | 4.67563200  | 3.36450600  | 1.51834100  |
| C | 3.49701700  | 2.57705400  | 0.92094500  |
| C | 3.96162400  | 1.49358700  | -0.07693700 |
| C | 4.99819500  | 0.56923100  | 0.59770400  |
| C | 6.17614500  | 1.35882600  | 1.19483700  |
| H | 5.24104400  | 1.95002300  | 3.05357500  |
| H | 6.55478400  | 3.01221600  | 2.55586300  |
| H | 5.16851700  | 3.93853900  | 0.71992100  |
| H | 2.93268700  | 2.09467200  | 1.73285400  |
| H | 4.45729300  | 1.98895900  | -0.92462700 |
| H | 4.50586800  | -0.00291600 | 1.39924100  |
| H | 5.38432100  | -0.16313500 | -0.11954500 |
| H | 6.73851600  | 1.83676000  | 0.37926200  |
| H | 6.87116900  | 0.66696500  | 1.68781700  |
| H | 4.30023700  | 4.09900100  | 2.24236700  |
| H | 2.80533200  | 3.27459500  | 0.43655100  |
| C | 0.40844700  | 4.28976600  | -2.88523100 |
| C | -0.44424300 | 3.27704000  | -2.10690000 |
| C | 0.40765500  | 2.45568800  | -1.12265900 |
| C | 1.57005600  | 1.75095500  | -1.85607000 |
| C | 2.43072700  | 2.76772200  | -2.63235800 |
| C | 1.57648400  | 3.60081400  | -3.60492400 |
| H | 0.80479900  | 5.04008000  | -2.18515100 |
| H | -0.21404000 | 4.83532600  | -3.60498300 |
| H | -0.92594600 | 2.59195600  | -2.82252400 |
| H | 0.79676900  | 3.12330500  | -0.34216200 |
| H | 1.09357800  | 1.09494200  | -2.59769700 |
| H | 2.92569600  | 3.44789500  | -1.92588700 |

|   |             |            |             |
|---|-------------|------------|-------------|
| H | 3.23064700  | 2.25631200 | -3.18288600 |
| H | 1.17974700  | 2.94192500 | -4.39163100 |
| H | 2.20618100  | 4.34431400 | -4.11044600 |
| H | -1.25491000 | 3.79174100 | -1.57791900 |
| H | -0.20989900 | 1.70907900 | -0.60774400 |

TS7

1 imaginary frequency

H = -4637.884798

G = -4637.970799

Esol = -4638.238405

|    |             |             |             |
|----|-------------|-------------|-------------|
| Se | -2.10791500 | -0.81061500 | -1.25005900 |
| N  | -2.29683200 | 0.80698600  | -1.89048200 |
| N  | -1.39506500 | -0.75837500 | 0.41154300  |
| S  | -2.30007000 | 2.15303900  | -0.92327500 |
| O  | -3.12869800 | 1.96812200  | 0.28726400  |
| O  | -2.57234700 | 3.28437400  | -1.80945400 |
| S  | -0.63912100 | -2.23775600 | 0.78849800  |
| O  | -1.17295900 | -3.29740500 | -0.09127500 |
| O  | -0.71022200 | -2.37499000 | 2.24379400  |
| C  | -4.17752300 | -1.47139200 | -0.61449600 |
| C  | -4.39076500 | -0.67784600 | 0.53447800  |
| C  | -3.75871400 | -0.95880100 | 1.76898300  |
| H  | -4.81347100 | 0.31316200  | 0.38892600  |
| H  | -3.59844700 | -2.02075300 | 1.98204900  |
| H  | -2.59822400 | -0.70325200 | 1.30955900  |
| H  | -4.72597700 | -1.22581800 | -1.52092600 |
| H  | -3.93298500 | -2.52568400 | -0.49016000 |
| C  | -4.00829900 | -0.09078300 | 2.98923600  |

|   |             |             |             |
|---|-------------|-------------|-------------|
| H | -4.07529000 | 0.96390400  | 2.70831100  |
| H | -4.93945900 | -0.38196000 | 3.48988900  |
| H | -3.19456800 | -0.20691800 | 3.71099200  |
| C | 1.07372600  | -1.93934800 | 0.32611300  |
| C | 2.00916900  | -1.67904300 | 1.32756500  |
| C | 1.42660000  | -1.97107500 | -1.02556200 |
| C | 3.33550800  | -1.44030900 | 0.96944200  |
| H | 1.70018100  | -1.67116400 | 2.36679300  |
| C | 2.74879300  | -1.73013500 | -1.38491900 |
| H | 0.68340700  | -2.18978600 | -1.78531500 |
| C | 3.67765100  | -1.46540700 | -0.37930700 |
| H | 4.09742900  | -1.23357400 | 1.71074300  |
| H | 3.07021100  | -1.74632300 | -2.41893100 |
| N | 5.08170500  | -1.20922500 | -0.76280800 |
| O | 5.90466300  | -1.10414800 | 0.14077000  |
| O | 5.33013300  | -1.12613500 | -1.96419400 |
| C | -0.59400900 | 2.27753500  | -0.34643800 |
| C | -0.34829900 | 2.75481000  | 0.94121900  |
| C | 0.44779200  | 1.90087300  | -1.19677400 |
| C | 0.96460900  | 2.84462600  | 1.39686800  |
| H | -1.17824400 | 3.02471100  | 1.58434100  |
| C | 1.76066700  | 1.97823200  | -0.74425600 |
| H | 0.22910700  | 1.53919700  | -2.19555400 |
| C | 1.99450400  | 2.43872700  | 0.55074600  |
| H | 1.19763200  | 3.20005400  | 2.39298800  |
| H | 2.59536700  | 1.68239000  | -1.36723400 |
| N | 3.37865500  | 2.46720300  | 1.05262700  |
| O | 4.24689000  | 1.93663000  | 0.35843300  |
| O | 3.58151500  | 3.00456200  | 2.13946500  |

TS8

1 imaginary frequency

H = -4637.907863

G = -4637.994147

Esol = -4638.266052

|    |             |             |             |
|----|-------------|-------------|-------------|
| Se | -1.70519400 | -0.14985700 | -1.03589200 |
| N  | -2.04952800 | -1.56278800 | 0.00488700  |
| N  | -2.33006600 | 1.25176600  | 0.14164200  |
| S  | -1.06059100 | -1.72368300 | 1.33853100  |
| O  | -0.93275200 | -0.43530000 | 2.05755300  |
| S  | -1.91367300 | 2.79571700  | -0.37550000 |
| C  | -4.25106500 | -0.57716200 | -1.83989600 |
| C  | -4.62000300 | -0.93468100 | -0.57019800 |
| C  | -4.13290600 | -2.12896700 | 0.00026100  |
| H  | -5.06004700 | -0.18911000 | 0.08762500  |
| H  | -3.83422200 | -2.92074300 | -0.68076500 |
| H  | -1.98020500 | 1.03614900  | 1.08624000  |
| H  | -3.86231600 | -1.31644600 | -2.53424800 |
| C  | -4.52378800 | -2.55806800 | 1.37892800  |
| H  | -3.79311000 | -3.23657700 | 1.81860700  |
| H  | -4.66214700 | -1.70217500 | 2.04619600  |
| H  | -5.48622700 | -3.08739500 | 1.30650300  |
| C  | 0.57762800  | -2.10730700 | 0.68285400  |
| C  | 0.88660000  | -3.43798400 | 0.39416900  |
| C  | 1.49968700  | -1.08037100 | 0.46948600  |
| C  | 2.13812400  | -3.74832600 | -0.13118300 |
| H  | 0.16051300  | -4.21814900 | 0.59399100  |
| C  | 2.75440900  | -1.38450100 | -0.05326800 |
| H  | 1.24458500  | -0.06196000 | 0.73650000  |

|   |             |             |             |
|---|-------------|-------------|-------------|
| C | 3.04569800  | -2.71440300 | -0.35258500 |
| H | 2.41937400  | -4.76707800 | -0.36694200 |
| H | 3.50001700  | -0.61694100 | -0.22560200 |
| N | 4.36903700  | -3.04308800 | -0.91802100 |
| O | 4.60819100  | -4.22666100 | -1.15198800 |
| O | 5.14532900  | -2.11293900 | -1.12351000 |
| C | -0.13121100 | 2.91593100  | -0.12432600 |
| C | 0.72897300  | 2.50354000  | -1.14603700 |
| C | 0.35319100  | 3.34152600  | 1.11514200  |
| C | 2.10171400  | 2.48441500  | -0.91219000 |
| H | 0.32897800  | 2.21902200  | -2.11264900 |
| C | 1.72643100  | 3.33784400  | 1.34794400  |
| H | -0.33665800 | 3.67927600  | 1.88105700  |
| C | 2.57265500  | 2.89068300  | 0.33498500  |
| H | 2.80341300  | 2.16616900  | -1.67339600 |
| H | 2.14404300  | 3.66220500  | 2.29306800  |
| N | 4.02471800  | 2.83660300  | 0.59397200  |
| O | 4.43982300  | 3.37446600  | 1.61684100  |
| O | 4.72296100  | 2.24596700  | -0.22954800 |
| O | -2.15786900 | 2.78041300  | -1.82207100 |
| O | -2.55268100 | 3.74968300  | 0.52641100  |
| O | -1.52193300 | -2.91224800 | 2.06224200  |
| H | -4.48566400 | 0.39882000  | -2.25368500 |

TS9

1 imaginary frequency

H = -5914.134507

G = -5914.272416

Esol = -5915.069847

|    |             |             |             |
|----|-------------|-------------|-------------|
| Se | 0.24874300  | 0.76576200  | 0.93666400  |
| N  | 2.23078400  | -0.85035300 | 2.31729900  |
| N  | -0.79923500 | -0.74286600 | 0.72336400  |
| S  | 3.62738000  | 0.00411900  | 1.94163100  |
| O  | 4.70602800  | -0.19035000 | 2.92352000  |
| O  | 3.24905400  | 1.39345200  | 1.61337100  |
| S  | -1.82683800 | -1.17440100 | 1.97320400  |
| O  | -2.21999200 | 0.01709500  | 2.74510300  |
| O  | -1.29437800 | -2.34567900 | 2.68185100  |
| C  | 0.63156900  | 1.06700500  | 4.63484600  |
| C  | 1.75637000  | 0.38614300  | 4.41349200  |
| C  | 1.79907000  | -0.97035100 | 3.74863300  |
| H  | 2.71765200  | 0.80386600  | 4.71212400  |
| H  | 0.77632000  | -1.34870600 | 3.65868300  |
| H  | -0.23484400 | -1.66729500 | 0.21102300  |
| H  | 0.65030300  | 2.03988600  | 5.12081600  |
| H  | -0.34489500 | 0.67747600  | 4.35747200  |
| C  | 2.62168500  | -1.99782600 | 4.53999700  |
| H  | 2.62301500  | -2.96041500 | 4.01721700  |
| H  | 3.65524600  | -1.66777100 | 4.67114500  |
| H  | 2.16970300  | -2.14512100 | 5.52734300  |
| C  | -3.28497000 | -1.74323600 | 1.07238100  |
| C  | -4.52806300 | -1.20983000 | 1.41570600  |
| C  | -3.15497400 | -2.73898700 | 0.09706100  |
| C  | -5.67206300 | -1.67080800 | 0.76652700  |
| H  | -4.59047000 | -0.44755900 | 2.18429400  |
| C  | -4.29596100 | -3.19543000 | -0.55663700 |
| H  | -2.17515300 | -3.13159600 | -0.16182800 |
| C  | -5.53433700 | -2.65299200 | -0.21085700 |
| H  | -6.65577000 | -1.28548700 | 1.00442800  |

|   |             |             |             |
|---|-------------|-------------|-------------|
| H | -4.24182800 | -3.96041900 | -1.32131400 |
| C | 4.11964800  | -0.78613700 | 0.39712800  |
| C | 3.24750300  | -0.75958100 | -0.69328300 |
| C | 5.39567600  | -1.33963500 | 0.31017100  |
| C | 3.66169500  | -1.30431800 | -1.90265200 |
| H | 2.25658800  | -0.33823200 | -0.57030300 |
| C | 5.81714500  | -1.88081800 | -0.90340400 |
| H | 6.04098400  | -1.34252200 | 1.18162600  |
| C | 4.94228200  | -1.85044100 | -1.98656600 |
| H | 3.01520600  | -1.31977500 | -2.77085300 |
| H | 6.79987000  | -2.32046300 | -1.01933400 |
| N | -6.74091300 | -3.13185600 | -0.90949900 |
| N | 5.38511100  | -2.41666700 | -3.27406900 |
| O | -7.82012400 | -2.63505600 | -0.58952100 |
| O | 4.60126400  | -2.35904600 | -4.22144900 |
| O | -6.59458000 | -3.99513600 | -1.77339400 |
| O | 6.51084200  | -2.90830900 | -3.32524400 |
| O | 0.11351900  | -2.71033200 | -0.49536500 |
| C | 1.04623500  | -3.48842000 | -0.03505400 |
| O | 1.85394900  | -3.20524700 | 0.86404400  |
| C | 1.10380400  | -4.86122600 | -0.69083500 |
| H | 2.01926900  | -5.38392300 | -0.40799200 |
| H | 0.24077500  | -5.45421000 | -0.36528100 |
| H | 1.04166500  | -4.76753400 | -1.77962600 |
| H | 2.14696000  | -1.74721700 | 1.78877700  |
| P | -0.58059400 | 2.13927000  | -0.70691600 |
| C | -1.50089700 | -1.17771300 | -3.95987400 |
| C | -0.22211800 | -0.34233500 | -4.09956200 |
| C | 0.14097100  | 0.34282200  | -2.77073400 |
| C | -1.02727400 | 1.22381400  | -2.26955600 |

|   |             |             |             |
|---|-------------|-------------|-------------|
| C | -2.32282100 | 0.38863600  | -2.13351800 |
| C | -2.66519100 | -0.31220500 | -3.45965100 |
| H | -1.31710200 | -1.99241300 | -3.24592100 |
| H | -1.75849300 | -1.64208100 | -4.91923300 |
| H | -0.35711700 | 0.41853900  | -4.88254600 |
| H | 0.35192900  | -0.43087900 | -2.02332900 |
| H | -1.20218700 | 2.02507900  | -3.00408500 |
| H | -2.17819800 | -0.36069800 | -1.35057900 |
| H | -3.16240700 | 1.01954700  | -1.82284000 |
| H | -2.91661700 | 0.44188400  | -4.22052300 |
| H | -3.56433500 | -0.92339200 | -3.31625500 |
| H | 0.61594800  | -0.97377700 | -4.41828100 |
| H | 1.05226500  | 0.93906300  | -2.89819000 |
| C | 2.73050800  | 5.52617700  | -1.16422300 |
| C | 2.19859000  | 4.84277200  | -2.43227000 |
| C | 0.84343600  | 4.15507700  | -2.18355700 |
| C | 0.95851400  | 3.15179000  | -1.01680400 |
| C | 1.45596300  | 3.85407300  | 0.27114500  |
| C | 2.80460500  | 4.54670500  | 0.01527300  |
| H | 2.06787200  | 6.36421700  | -0.90148100 |
| H | 3.71844200  | 5.96036900  | -1.35907300 |
| H | 2.92321300  | 4.09073800  | -2.77548100 |
| H | 0.09377300  | 4.91984600  | -1.93975000 |
| H | 1.70873200  | 2.39568000  | -1.28345000 |
| H | 0.71881700  | 4.60389100  | 0.59097000  |
| H | 1.57273900  | 3.13594200  | 1.08816600  |
| H | 3.56345200  | 3.77676300  | -0.17537700 |
| H | 3.11767900  | 5.06781400  | 0.92727000  |
| H | 2.09277000  | 5.56989700  | -3.24660300 |
| H | 0.50697800  | 3.65703900  | -3.10108600 |



|   |             |            |             |
|---|-------------|------------|-------------|
| C | -4.68027100 | 4.34383000 | 0.30256500  |
| C | -3.76023300 | 4.96068900 | -0.76052900 |
| C | -2.75852100 | 3.93146900 | -1.31762700 |
| C | -1.94790500 | 3.29640200 | -0.16444300 |
| C | -2.86901700 | 2.65910100 | 0.89692600  |
| C | -3.86971200 | 3.69387100 | 1.43311400  |
| H | -5.31991000 | 3.58400300 | -0.16983800 |
| H | -5.35274600 | 5.11001500 | 0.70672400  |
| H | -3.20512200 | 5.80209000 | -0.32101600 |
| H | -3.31170400 | 3.15217400 | -1.85572000 |
| H | -1.38725000 | 4.10124600 | 0.33310000  |
| H | -3.41946200 | 1.82020500 | 0.44996400  |
| H | -2.26988400 | 2.23460300 | 1.70605900  |
| H | -3.32373300 | 4.47259400 | 1.98568600  |
| H | -4.53695600 | 3.21106500 | 2.15671900  |
| H | -4.35027800 | 5.37413800 | -1.58759400 |
| H | -2.09925800 | 4.41390000 | -2.04799200 |
